# Supplementary material for: Gold(I)-Catalyzed Aromatization: Expeditious Synthesis of Polyfunctionalized Naphthalenes
Source: PubMed Central journal article supplement — iScience. 2019 Oct 25;21:499–508. doi: 10.1016/j.isci.2019.10.042 (PMC6849331; doi:10.1016/j.isci.2019.10.042), 2019-10-25
Supplement: mmc1.pdf [file mmc1.pdf]

**ISCI, Volume 21**

**Supplemental Information**

**Gold(I)-Catalyzed Aromatization: Expeditious**

**Synthesis of Polyfunctionalized Naphthalenes**

**Cheng Zhang, Kemiao Hong, Shanliang Dong, Chao Pei, Xiaolu Zhang, Ciwang He, Wenhao Hu, and Xinfang Xu**

## Supplemental Figures

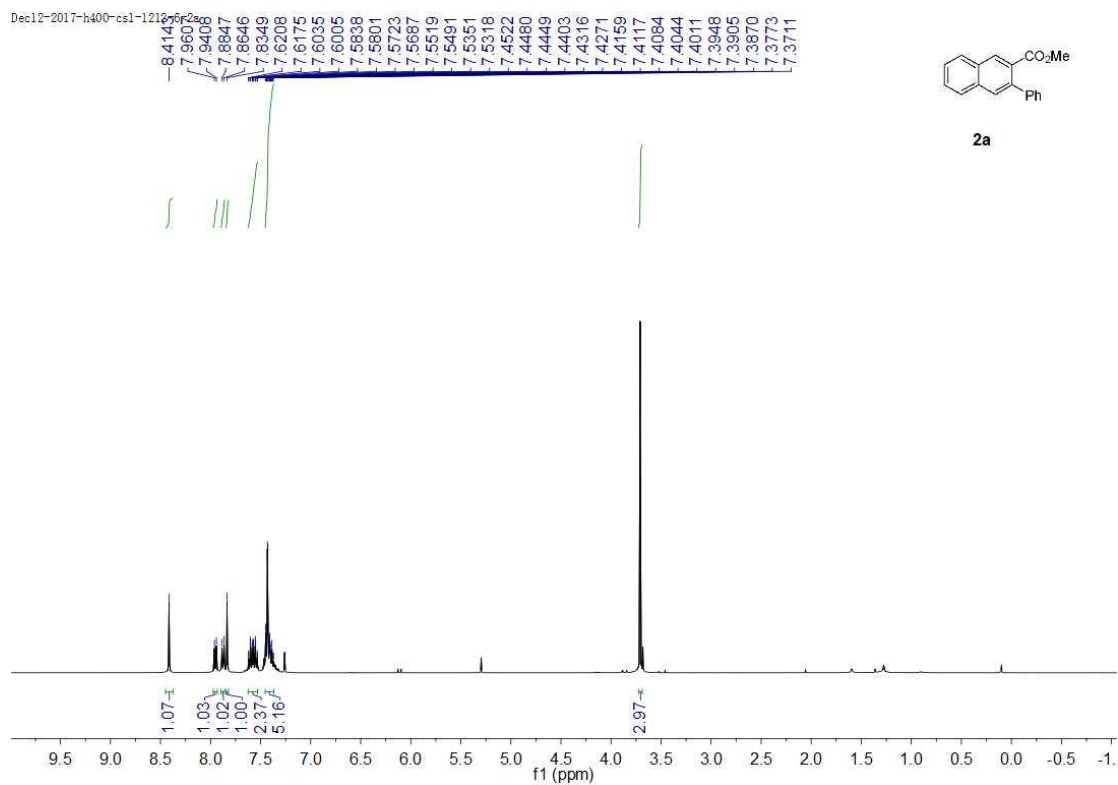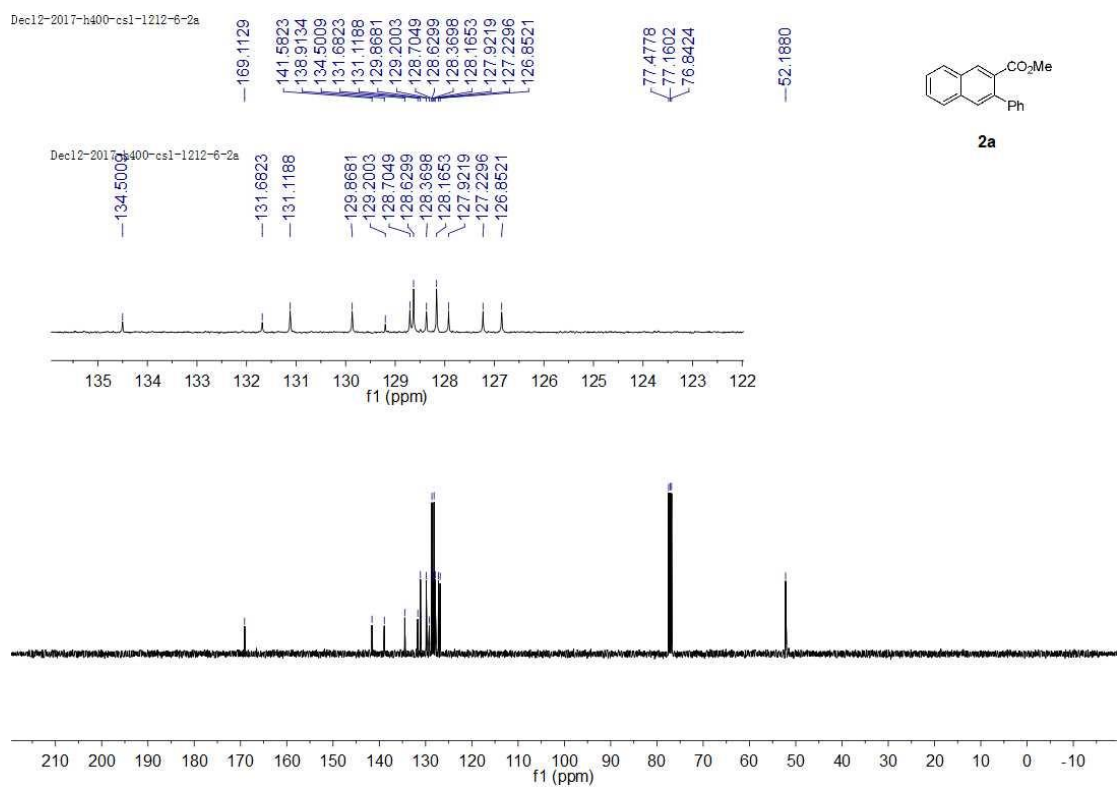

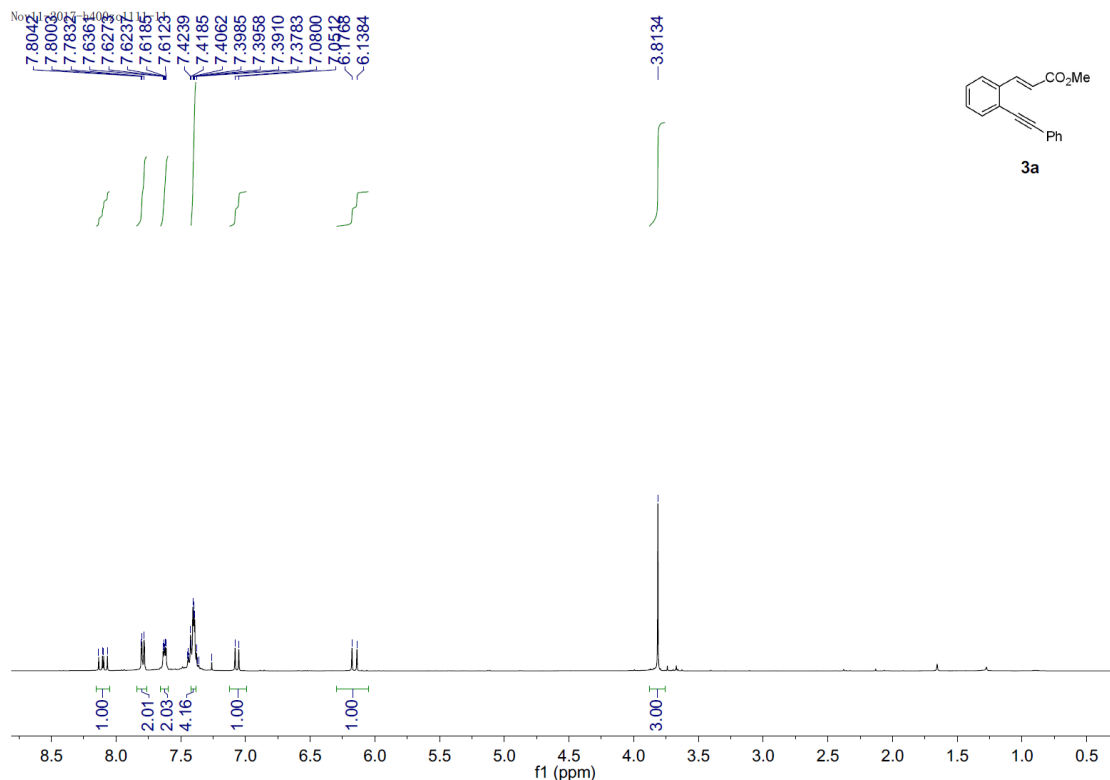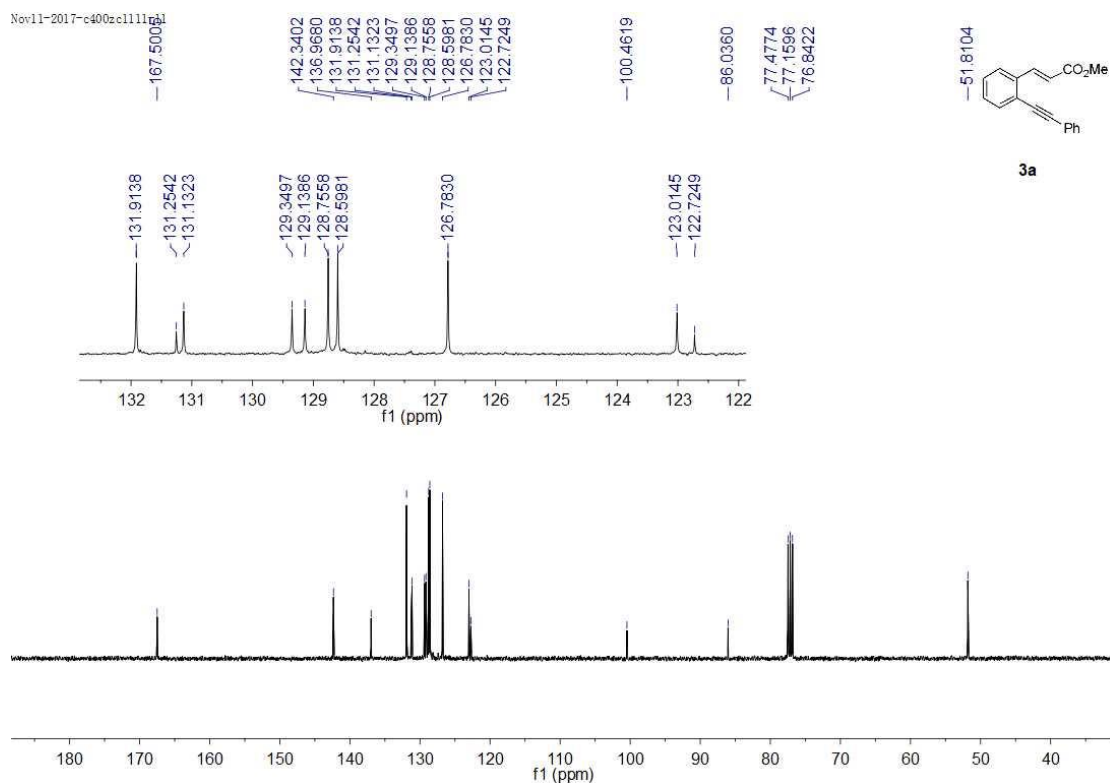

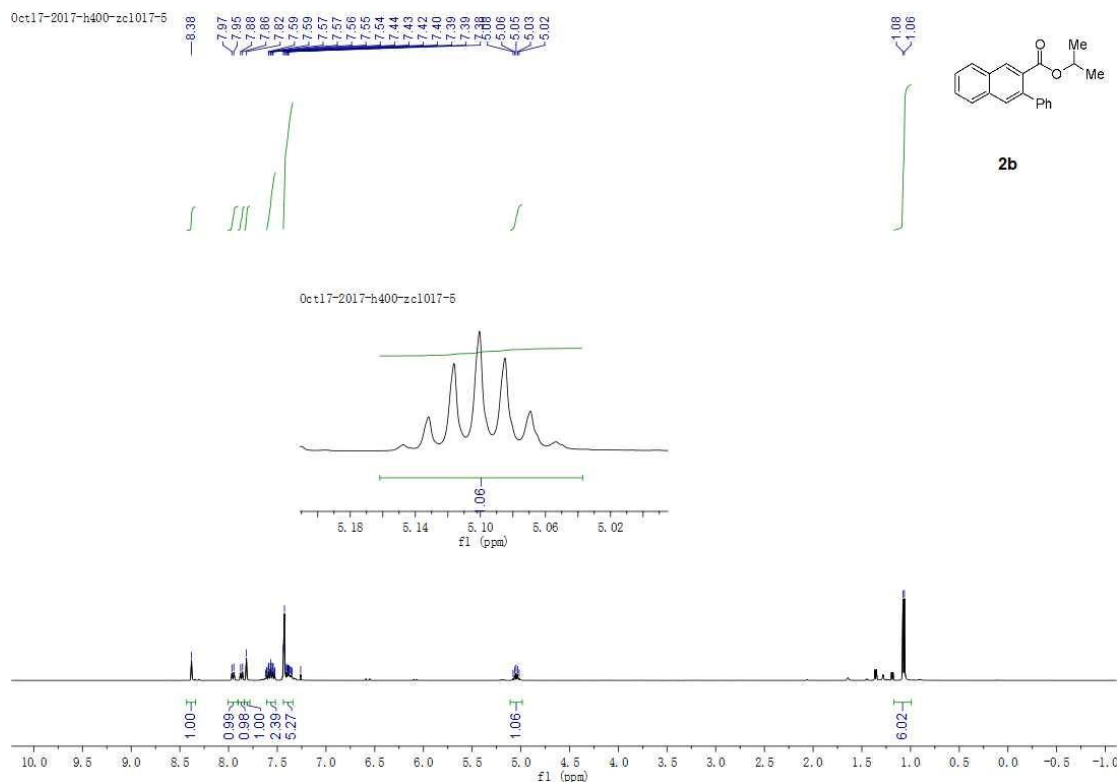

**Figure S5.**  $^1\text{H}$  NMR spectra (400 MHz) of **2b** in  $\text{CDCl}_3$ , related to **Scheme 1**.

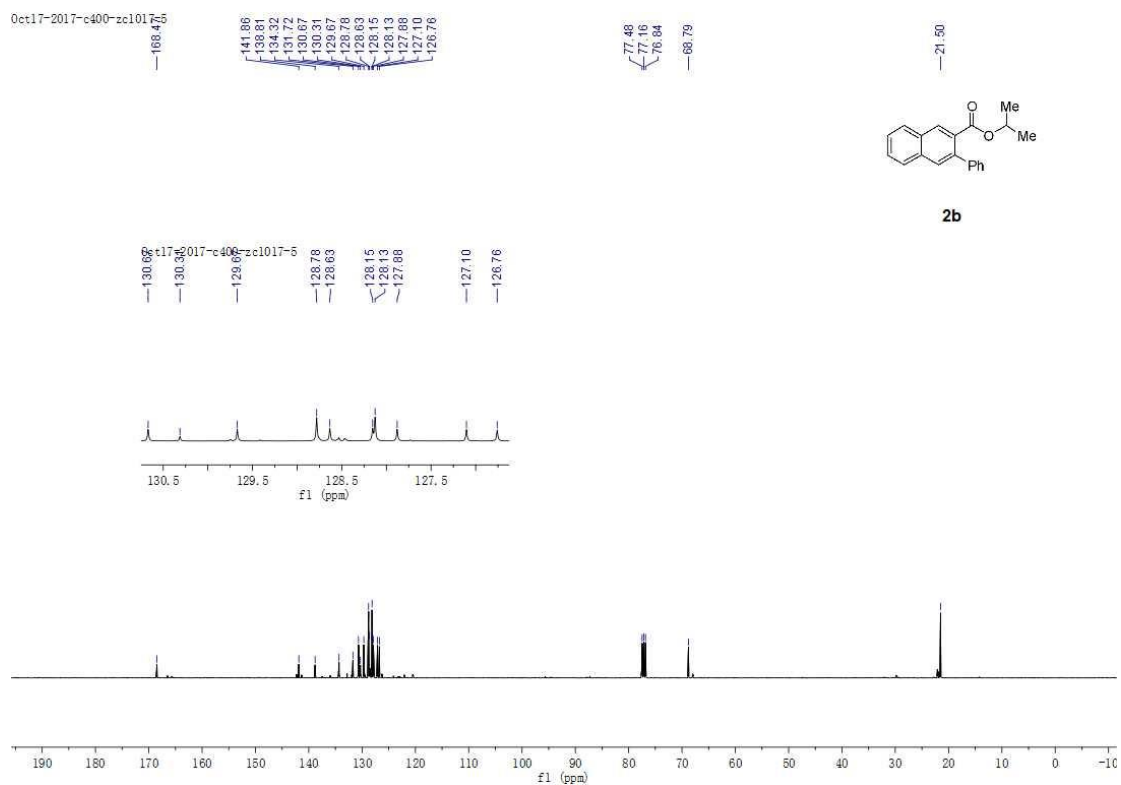

**Figure S6.**  $^{13}\text{C}$  NMR spectra (400 MHz) of **2b** in  $\text{CDCl}_3$ , related to **Scheme 1**.



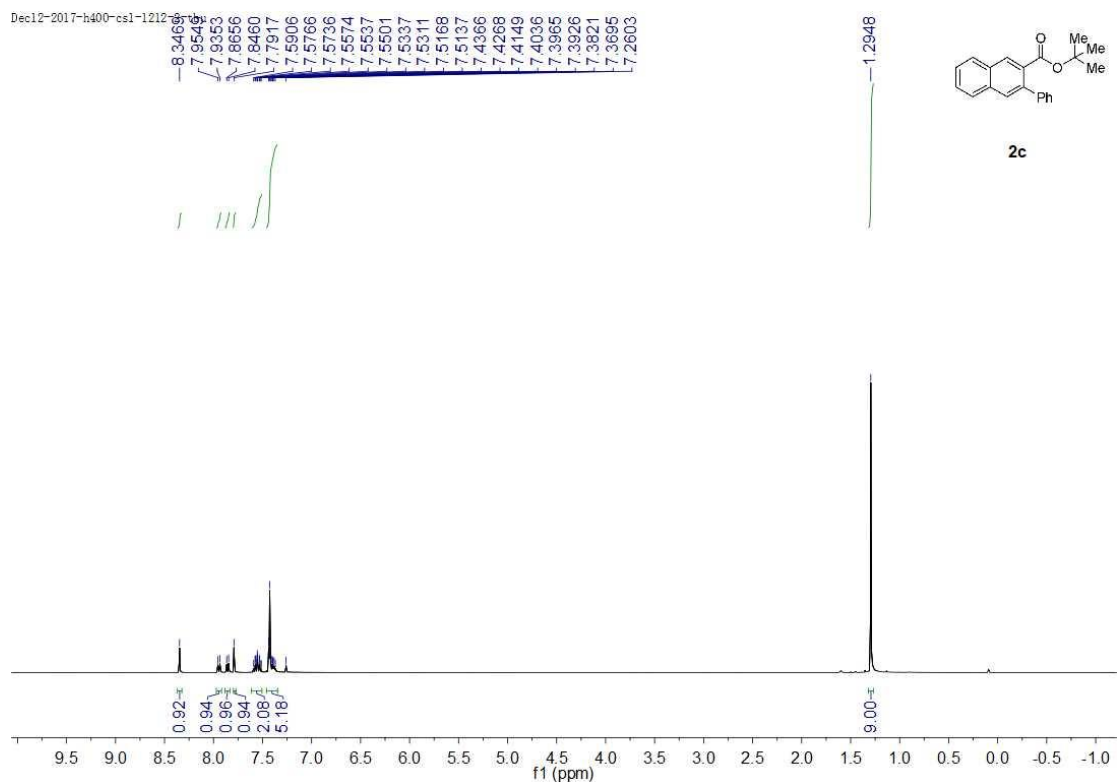

**Figure S7.**  $^1\text{H}$  NMR spectra (400 MHz) of **2c** in  $\text{CDCl}_3$ , related to **Scheme 1**.

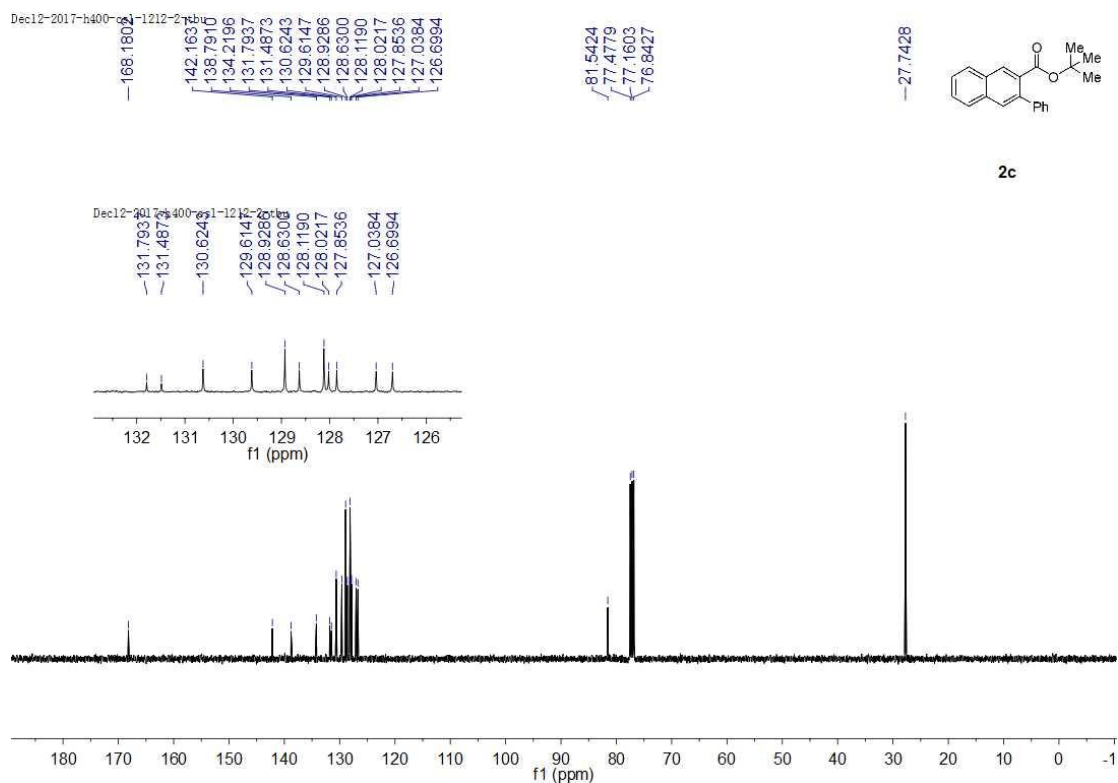

**Figure S8.**  $^{13}\text{C}$  NMR spectra (400 MHz) of **2c** in  $\text{CDCl}_3$ , related to **Scheme 1**.

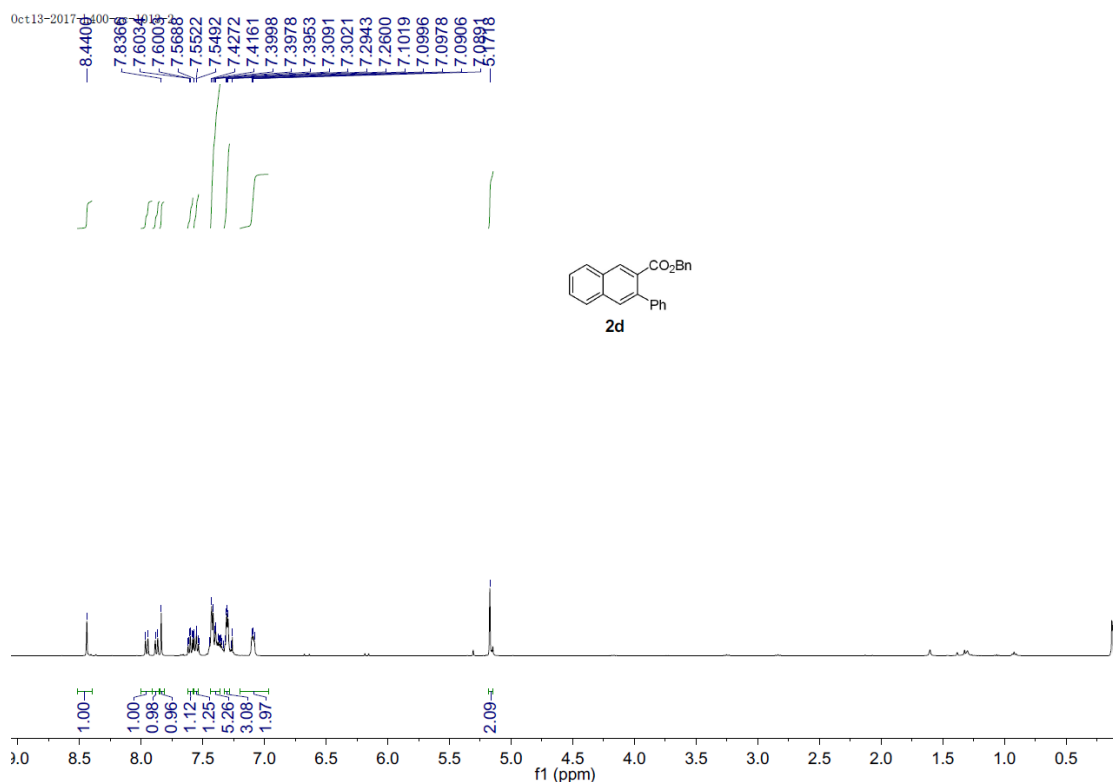

**Figure S9.**  $^1\text{H}$  NMR spectra (400 MHz) of **2d** in  $\text{CDCl}_3$ , related to **Scheme 1**.

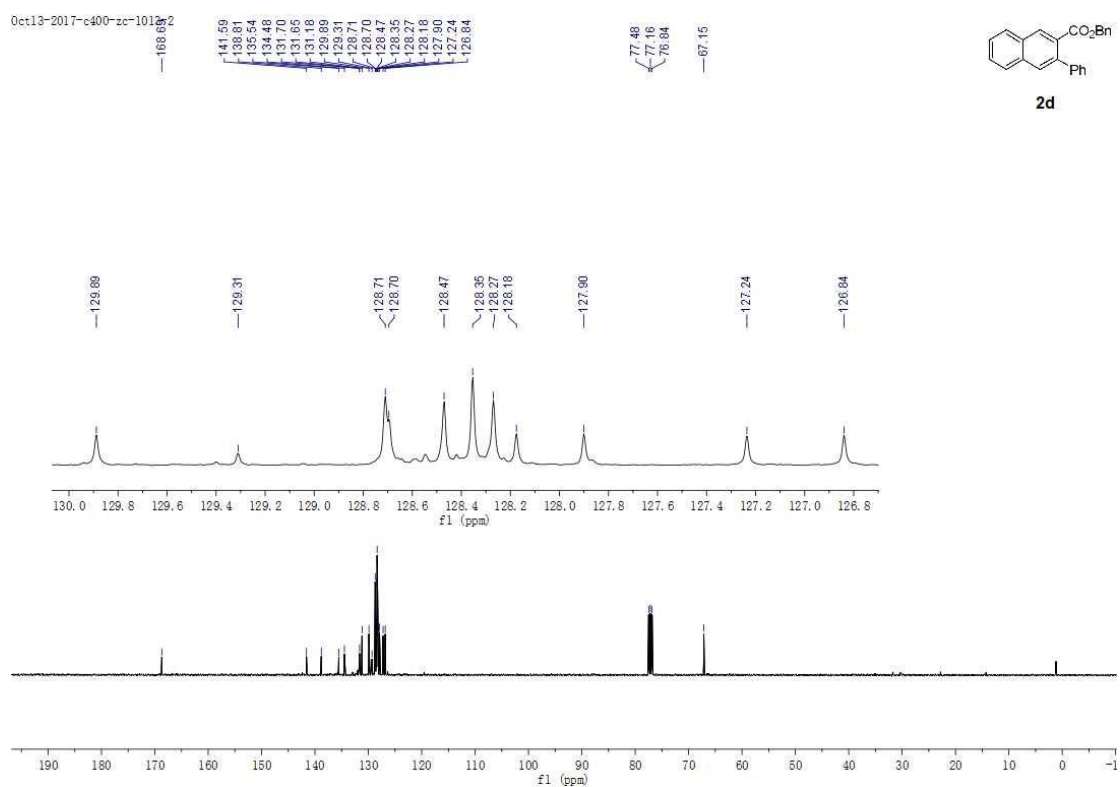

**Figure S10.**  $^{13}\text{C}$  NMR spectra (400 MHz) of **2d** in  $\text{CDCl}_3$ , related to **Scheme 1**.

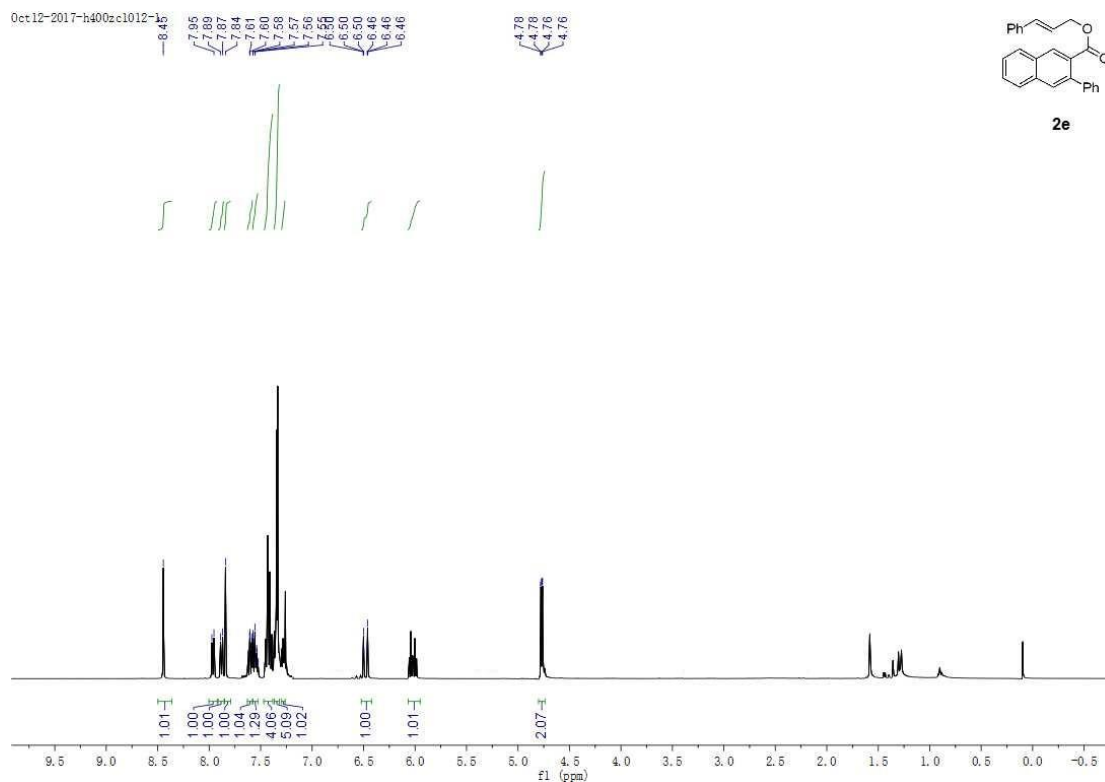

**Figure S11.**  $^1\text{H}$  NMR spectra (400 MHz) of **2e** in  $\text{CDCl}_3$ , related to **Scheme 1**.

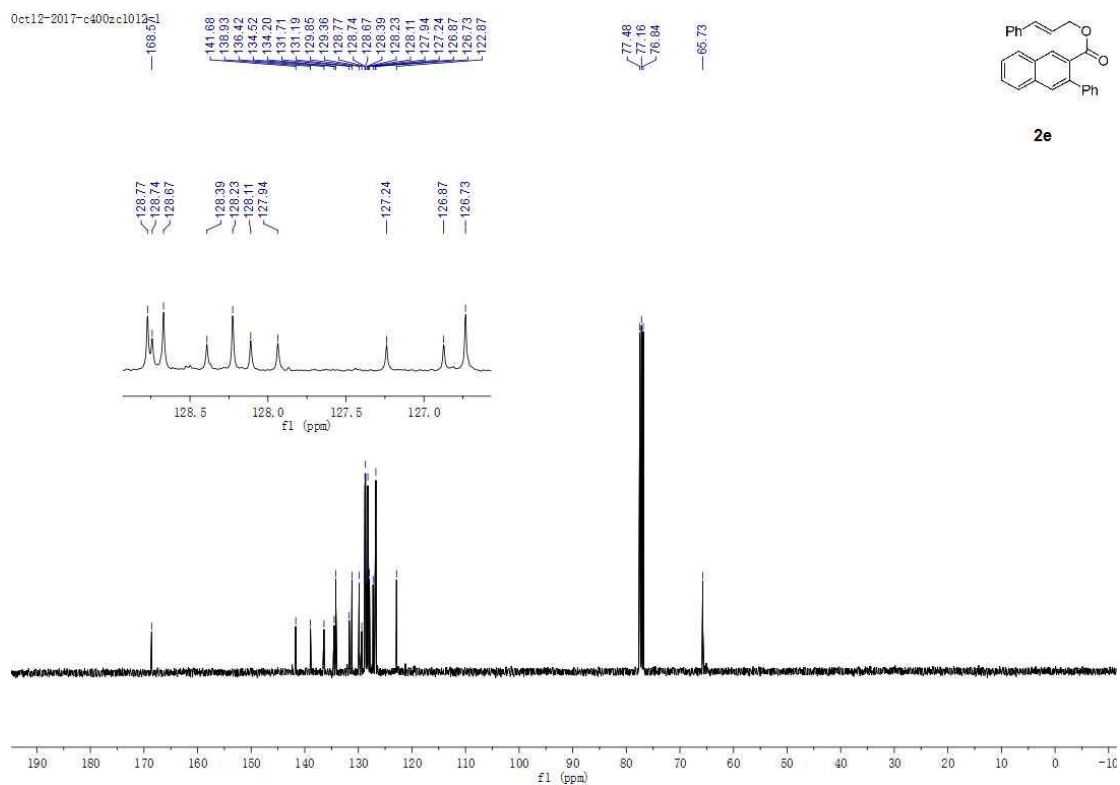

**Figure S12.**  $^{13}\text{C}$  NMR spectra (400 MHz) of **2e** in  $\text{CDCl}_3$ , related to **Scheme 1**.

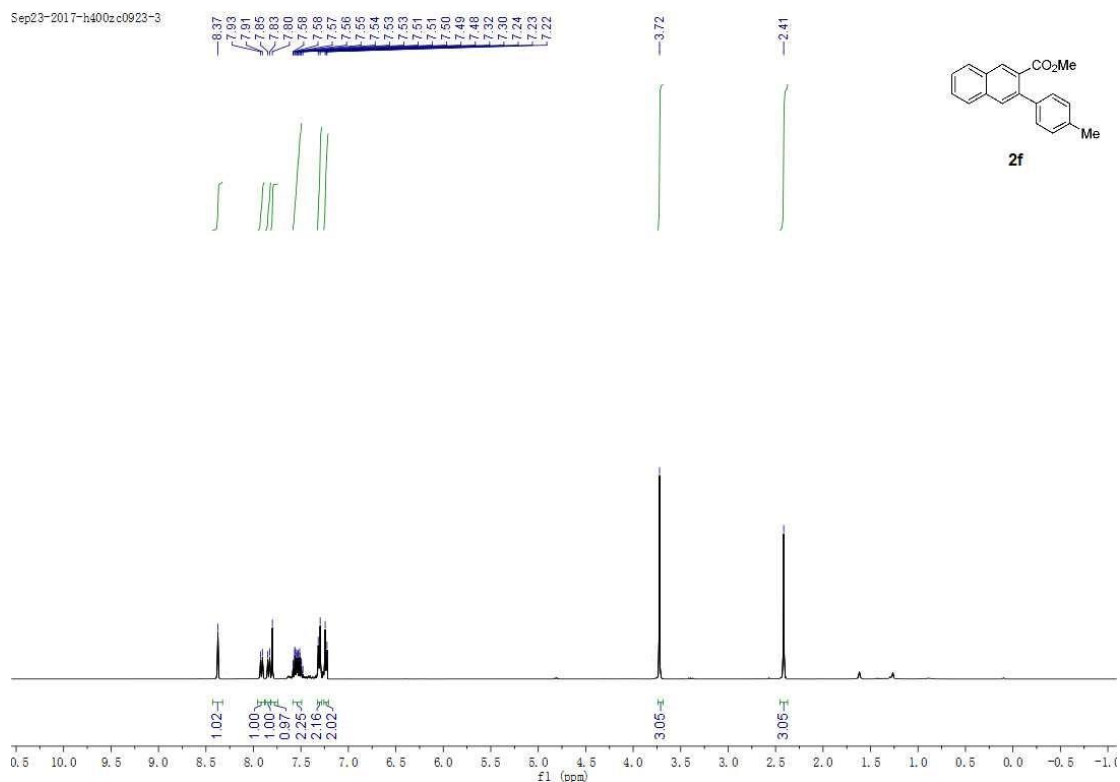

**Figure S13.** <sup>1</sup>H NMR spectra (400 MHz) of **2f** in CDCl<sub>3</sub>, related to **Scheme 1**.

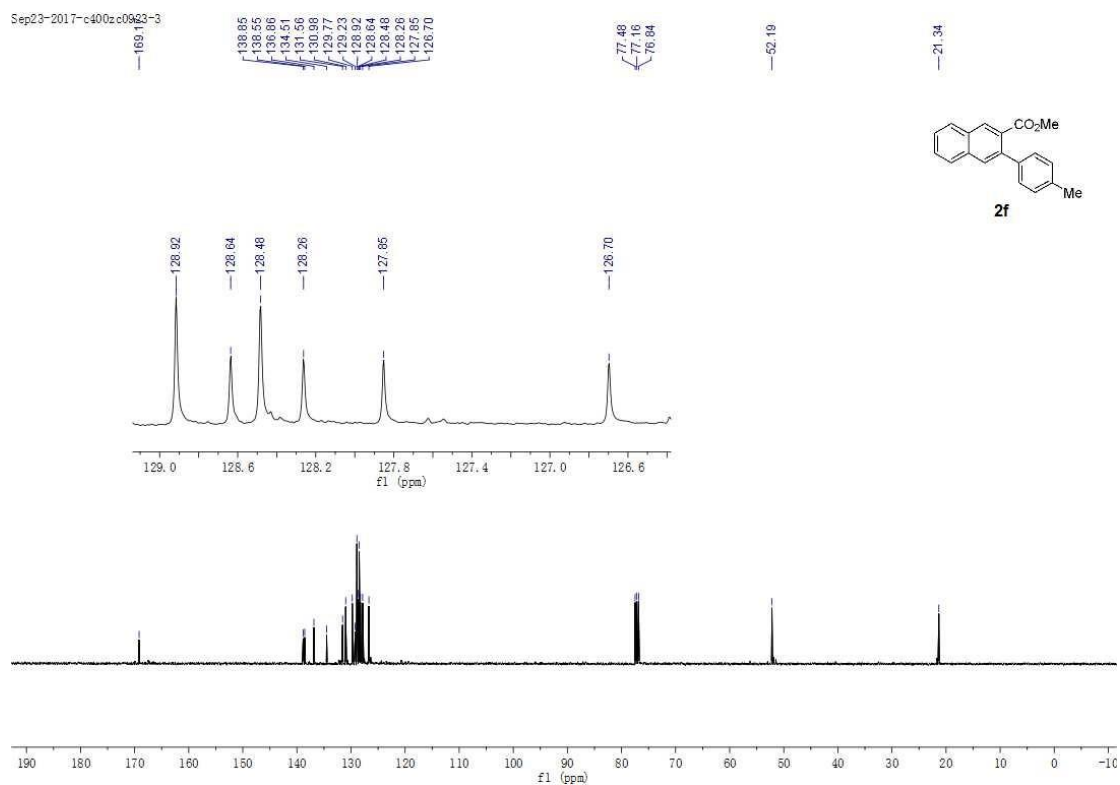

**Figure S14.** <sup>13</sup>C NMR spectra (400 MHz) of **2f** in CDCl<sub>3</sub>, related to **Scheme 1**.

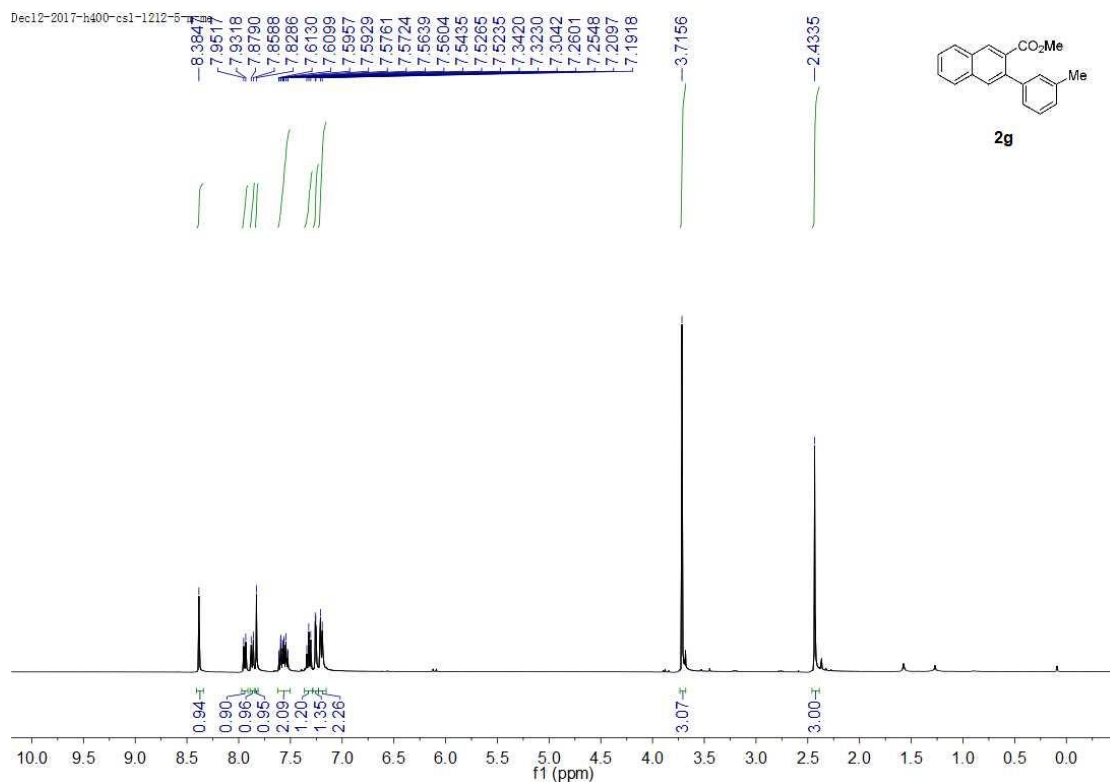

**Figure S15.** <sup>1</sup>H NMR spectra (400 MHz) of **2g** in CDCl<sub>3</sub>, related to **Scheme 1**.

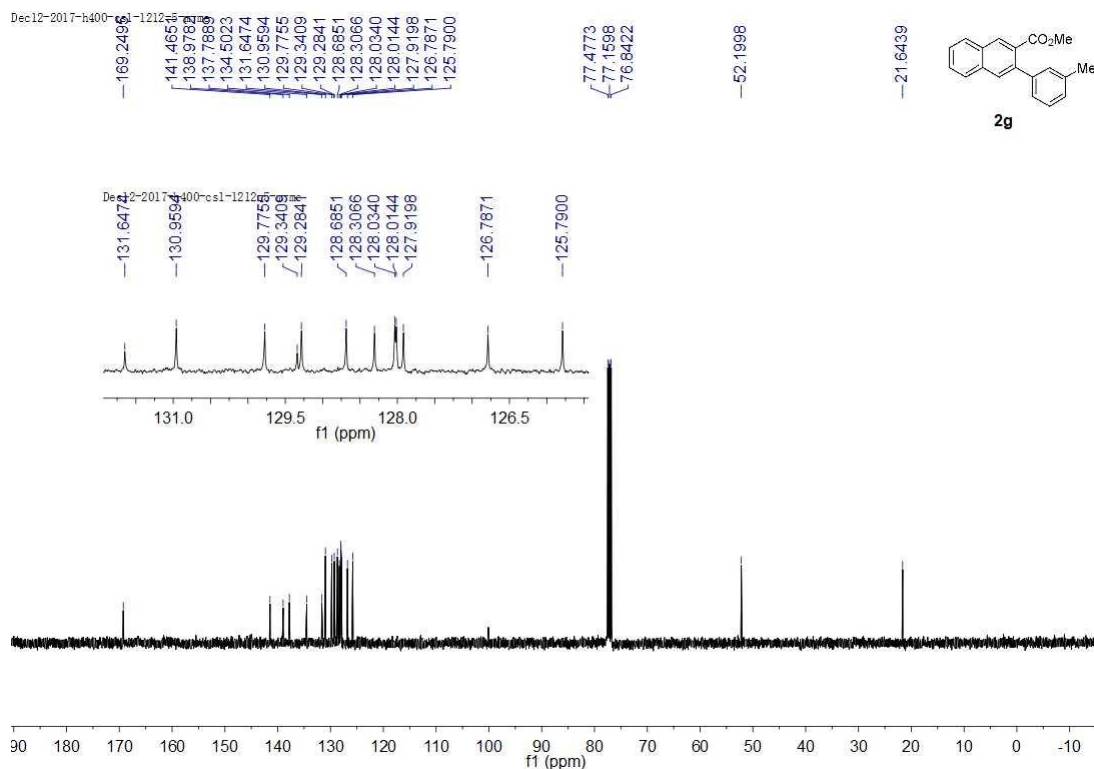

**Figure S16.** <sup>13</sup>C NMR spectra (400 MHz) of **2g** in CDCl<sub>3</sub>, related to **Scheme 1**.

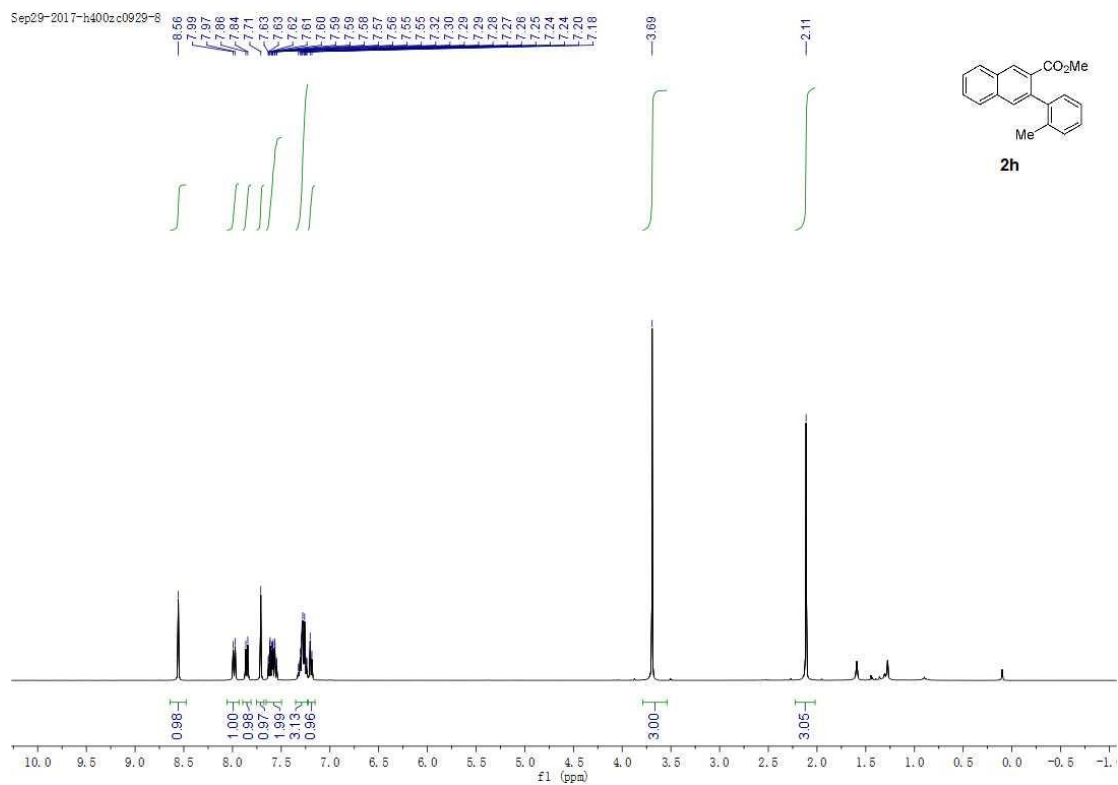

**Figure S17.** <sup>1</sup>H NMR spectra (400 MHz) of **2h** in CDCl<sub>3</sub>, related to **Scheme 1**.

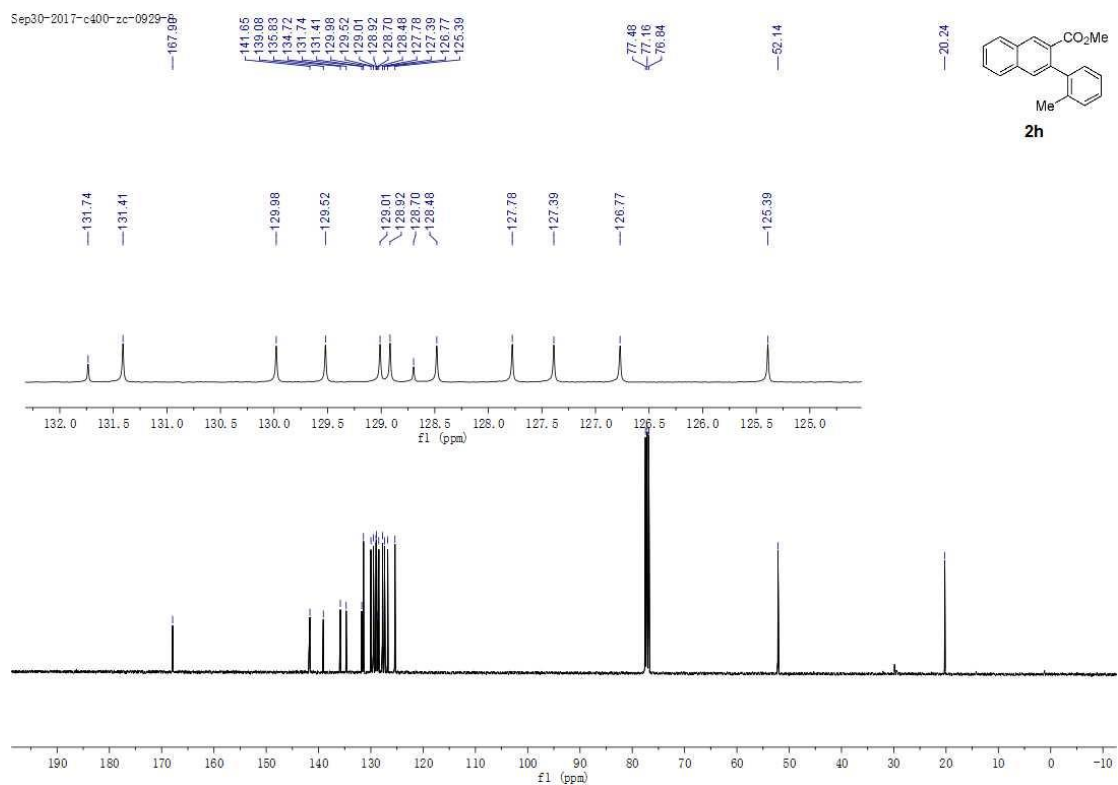

**Figure S18.** <sup>13</sup>C NMR spectra (400 MHz) of **2h** in CDCl<sub>3</sub>, related to **Scheme 1**.

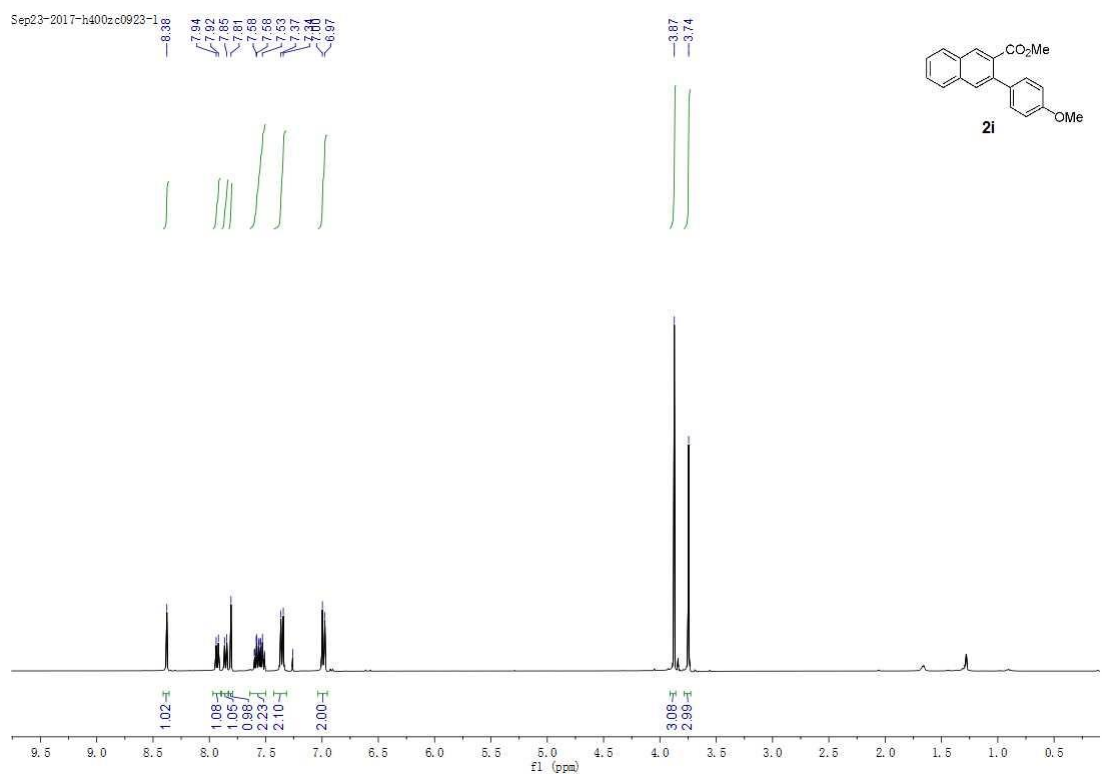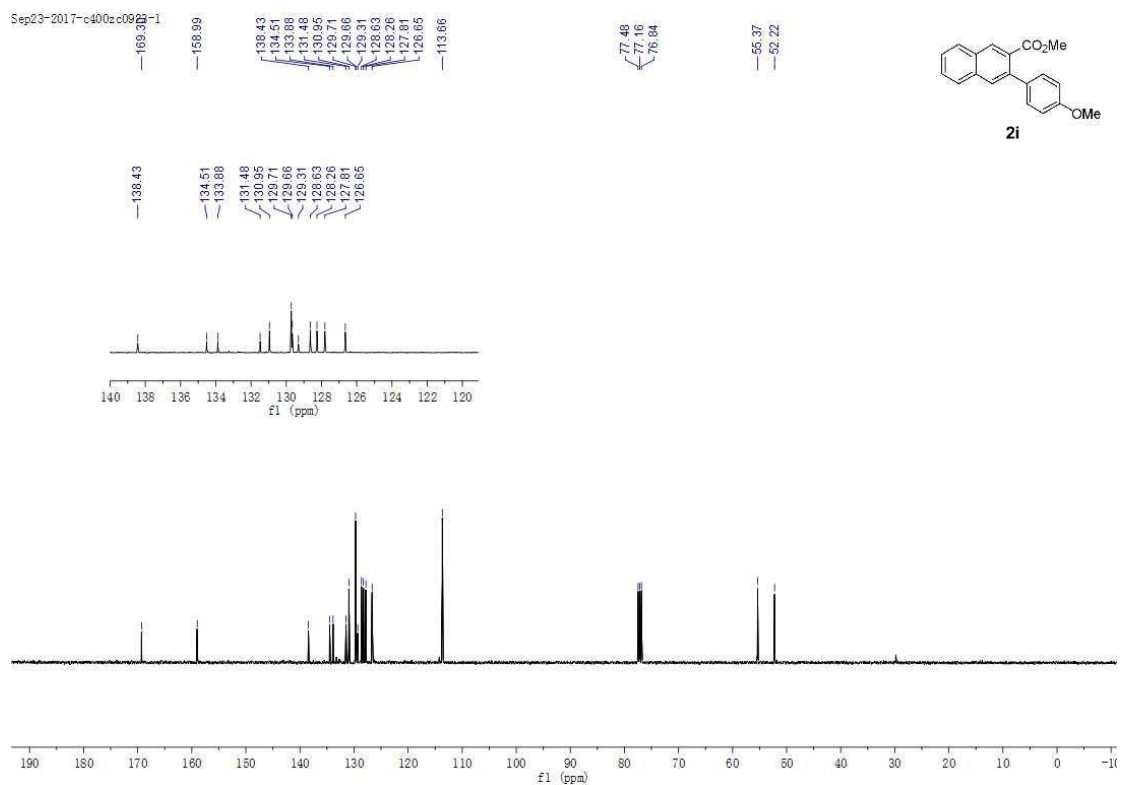

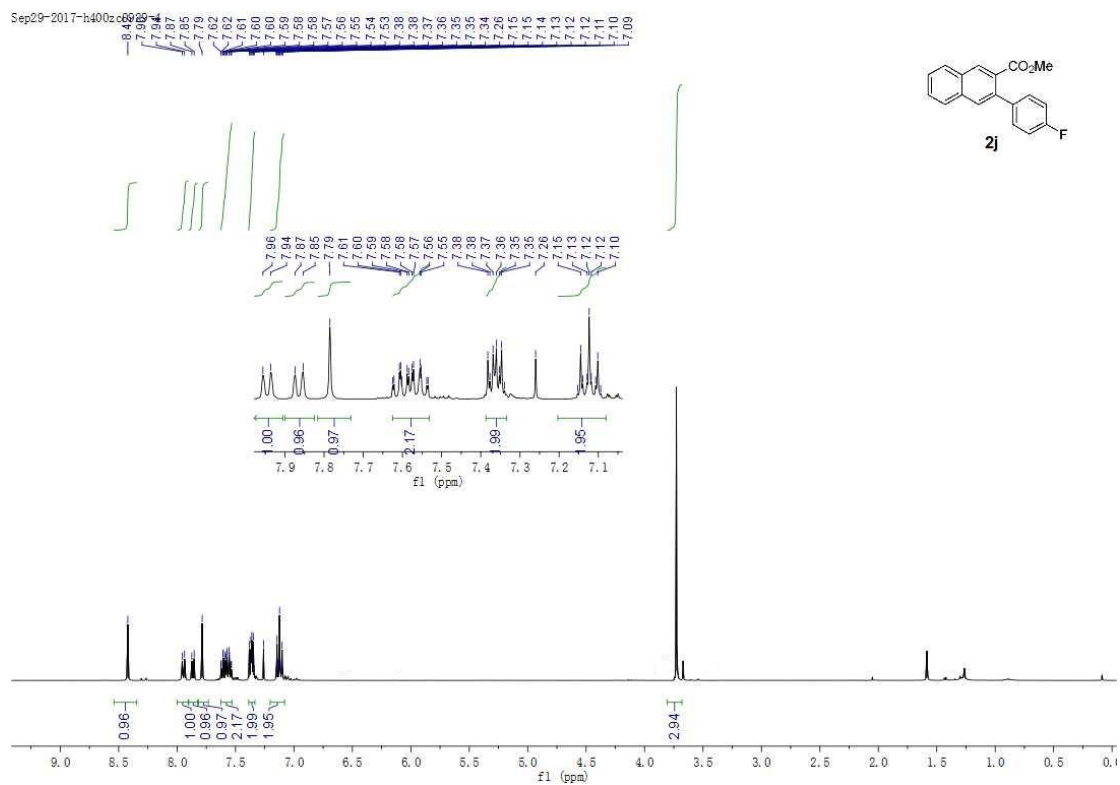

**Figure S21.**  $^1\text{H}$  NMR spectra (400 MHz) of **2j** in  $\text{CDCl}_3$ , related to **Scheme 1**.

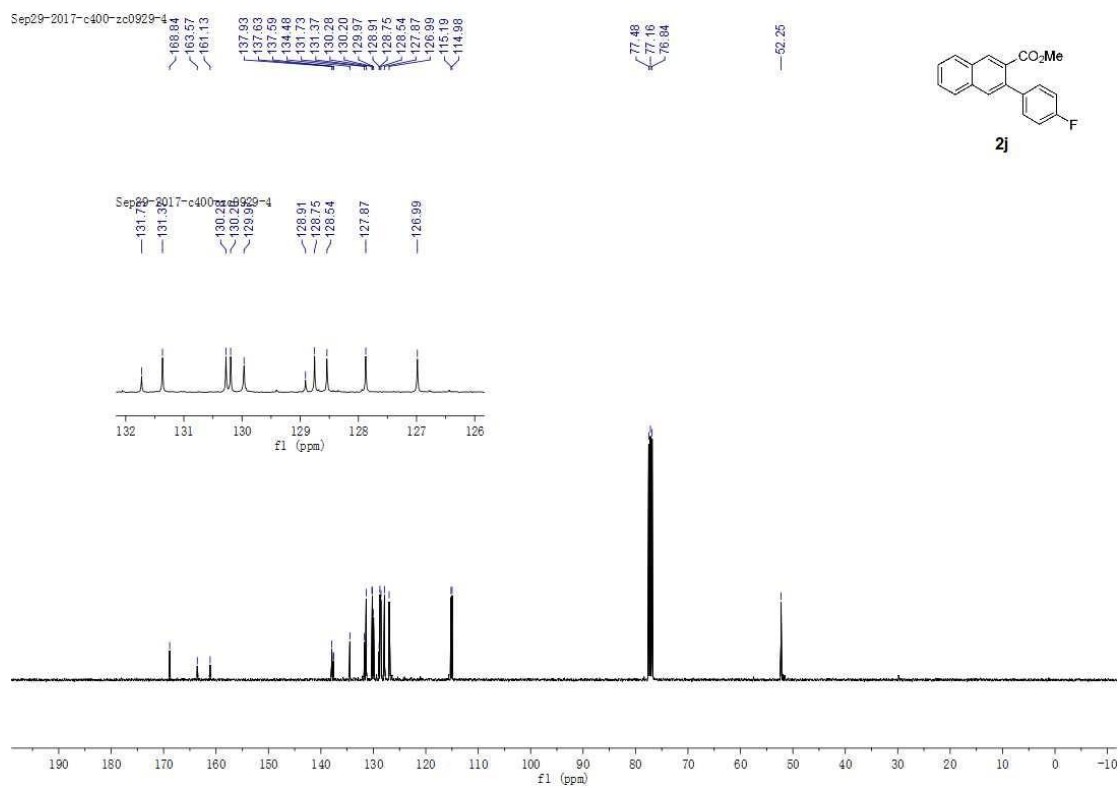

**Figure S22.**  $^{13}\text{C}$  NMR spectra (400 MHz) of **2j** in  $\text{CDCl}_3$ , related to **Scheme 1**.



Dec12-2017-f400-zc-0929-4

-115.6919

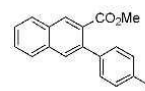

**2j**

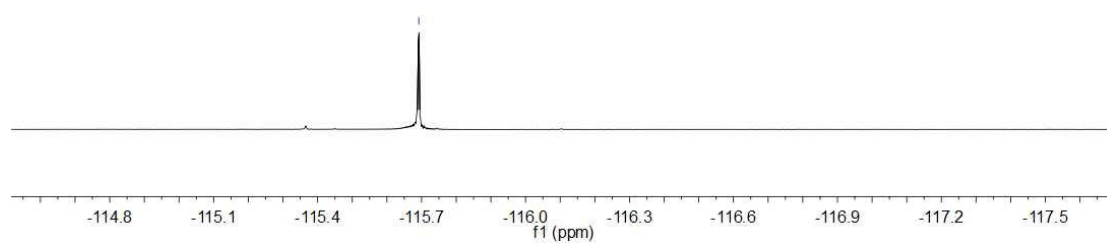

**Figure S23.** <sup>19</sup>F NMR spectra (400 MHz) of **2j** in CDCl<sub>3</sub>, related to **Scheme 1**.

Dec12-2017-h400-cs1-121-3-p

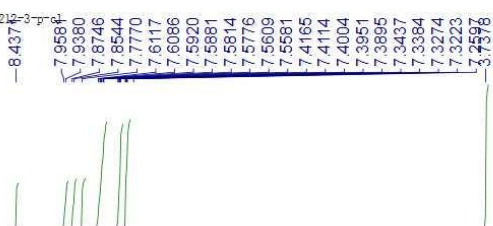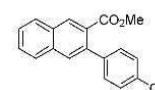

**2k**

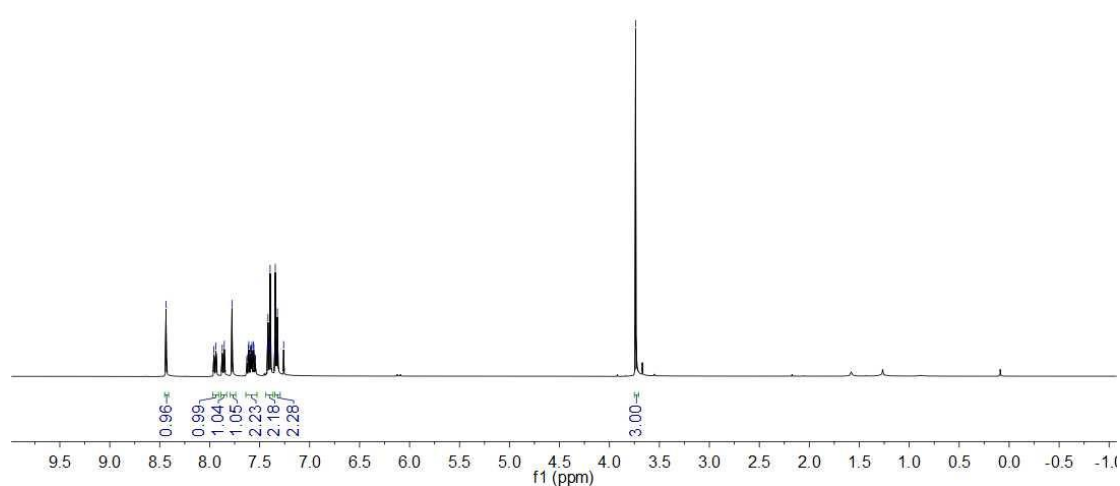

**Figure S24.** <sup>1</sup>H NMR spectra (400 MHz) of **2k** in CDCl<sub>3</sub>, related to **Scheme 1**.

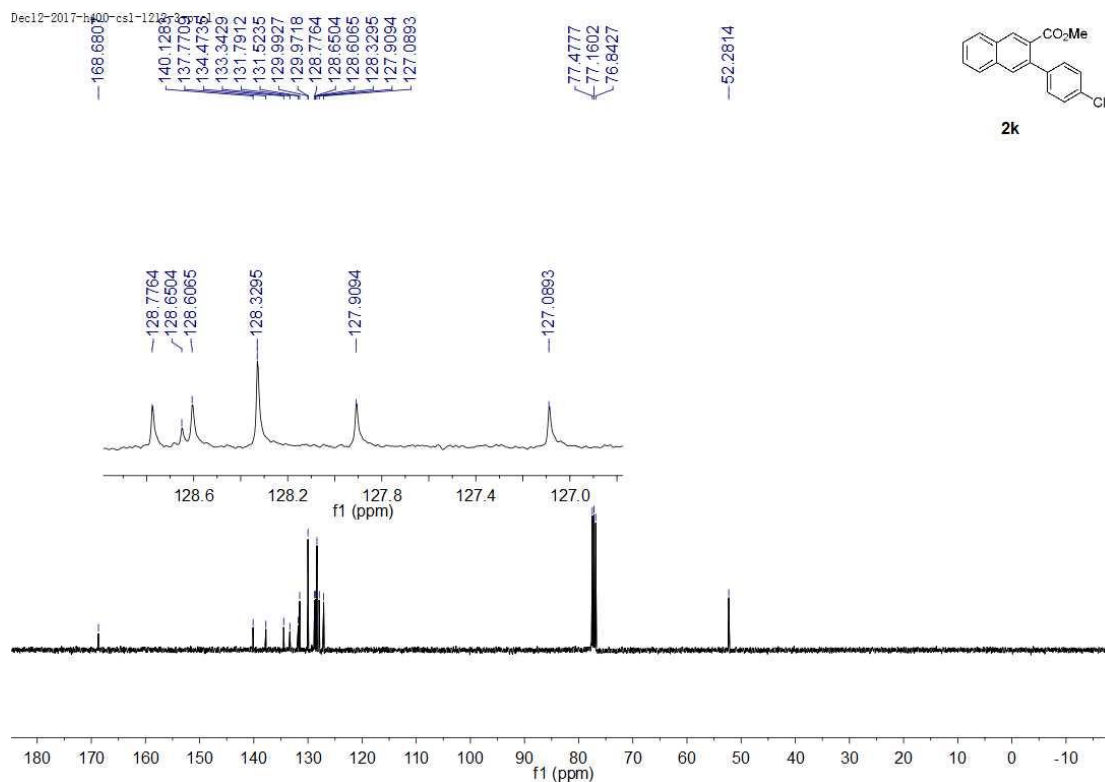

**Figure S25.**  $^{13}\text{C}$  NMR spectra (400 MHz) of **2k** in  $\text{CDCl}_3$ , related to **Scheme 1**.

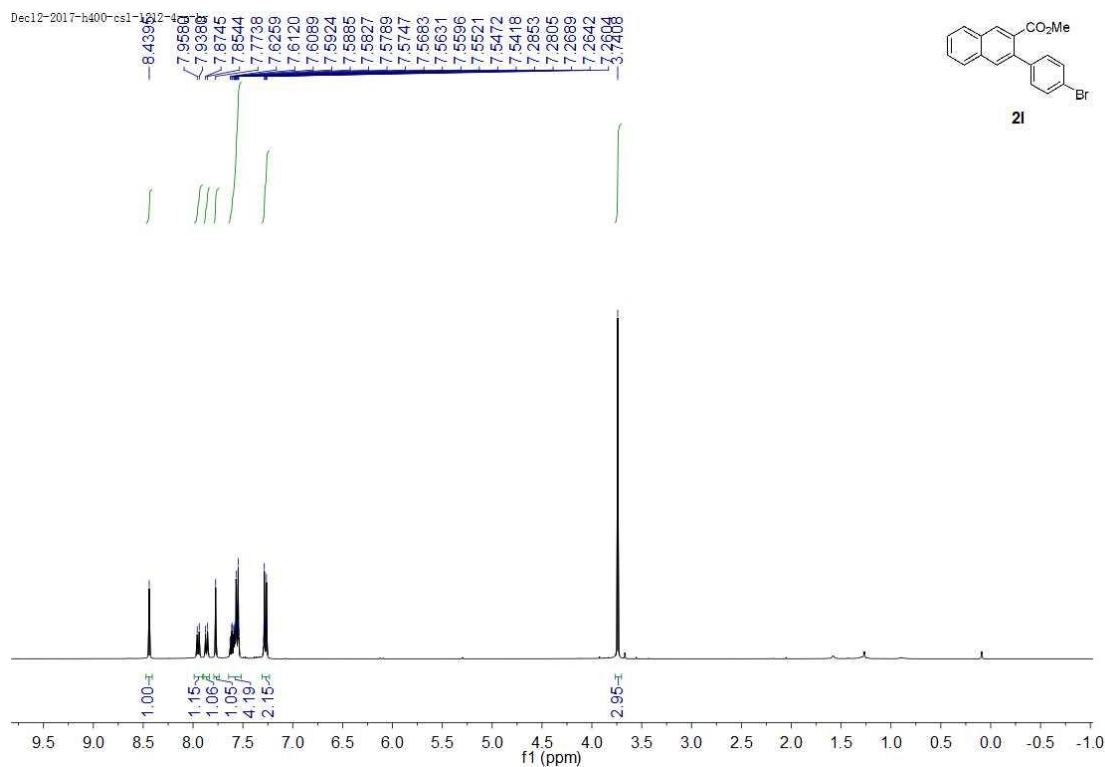

**Figure S26.**  $^1\text{H}$  NMR spectra (400 MHz) of **2l** in  $\text{CDCl}_3$ , related to **Scheme 1**.

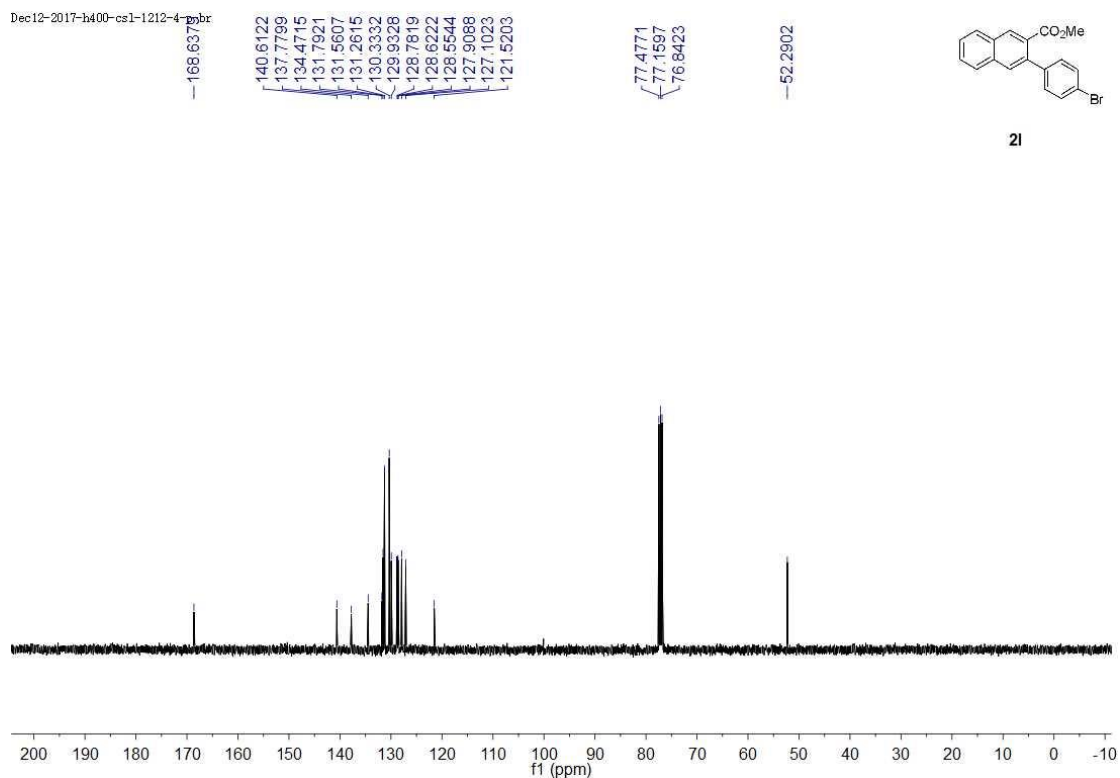

**Figure S27.**  $^{13}\text{C}$  NMR spectra (400 MHz) of **2l** in  $\text{CDCl}_3$ , related to **Scheme 1**.

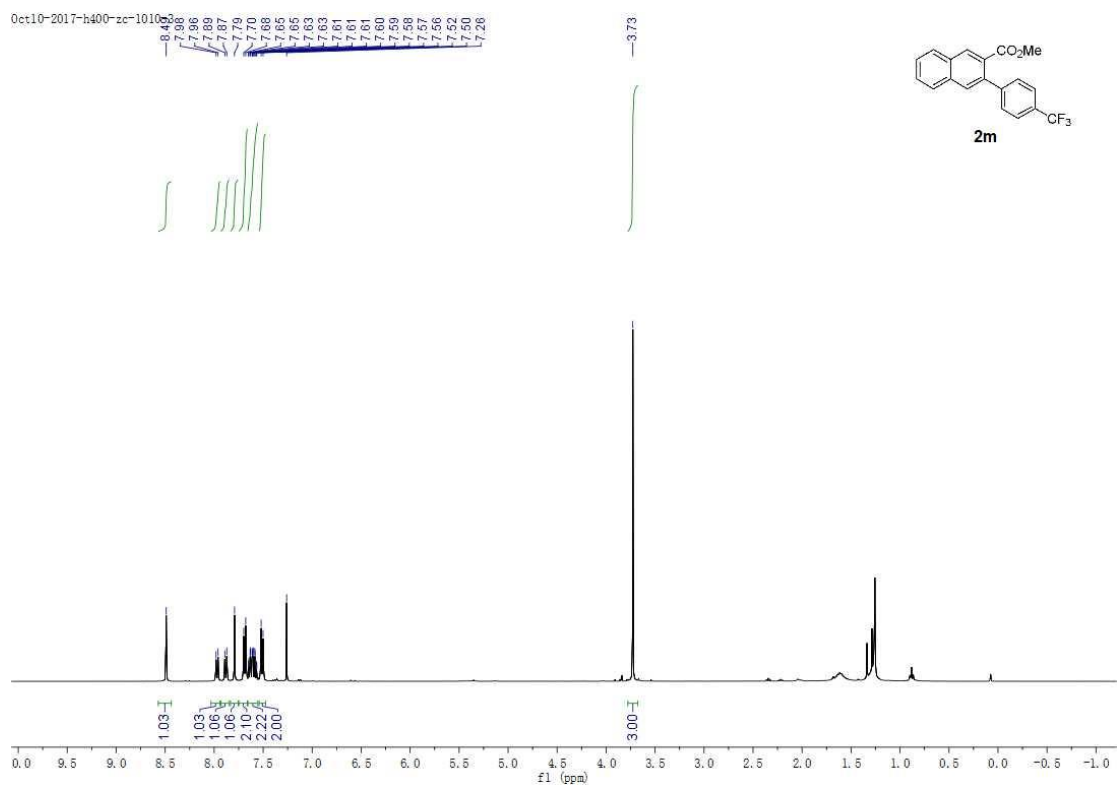

**Figure S28.**  $^1\text{H}$  NMR spectra (400 MHz) of **2m** in  $\text{CDCl}_3$ , related to **Scheme 1**.

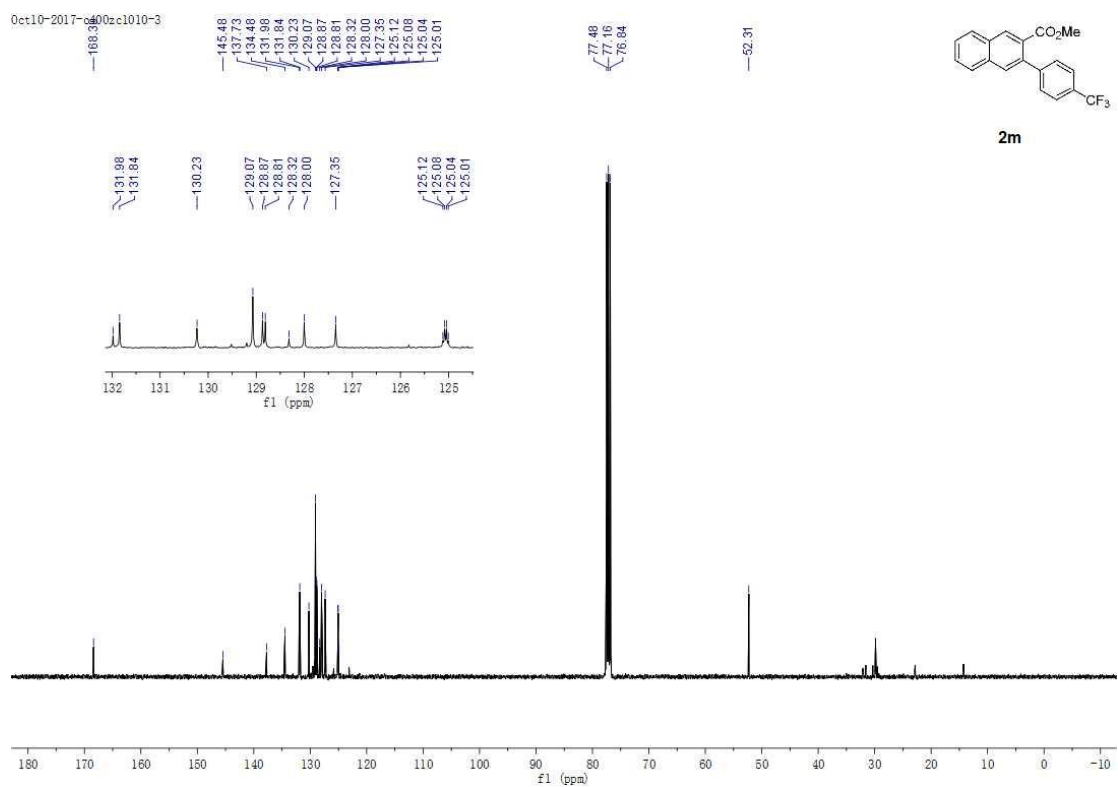

**Figure S29.** <sup>13</sup>C NMR spectra (400 MHz) of **2m** in CDCl<sub>3</sub>, related to **Scheme 1**.

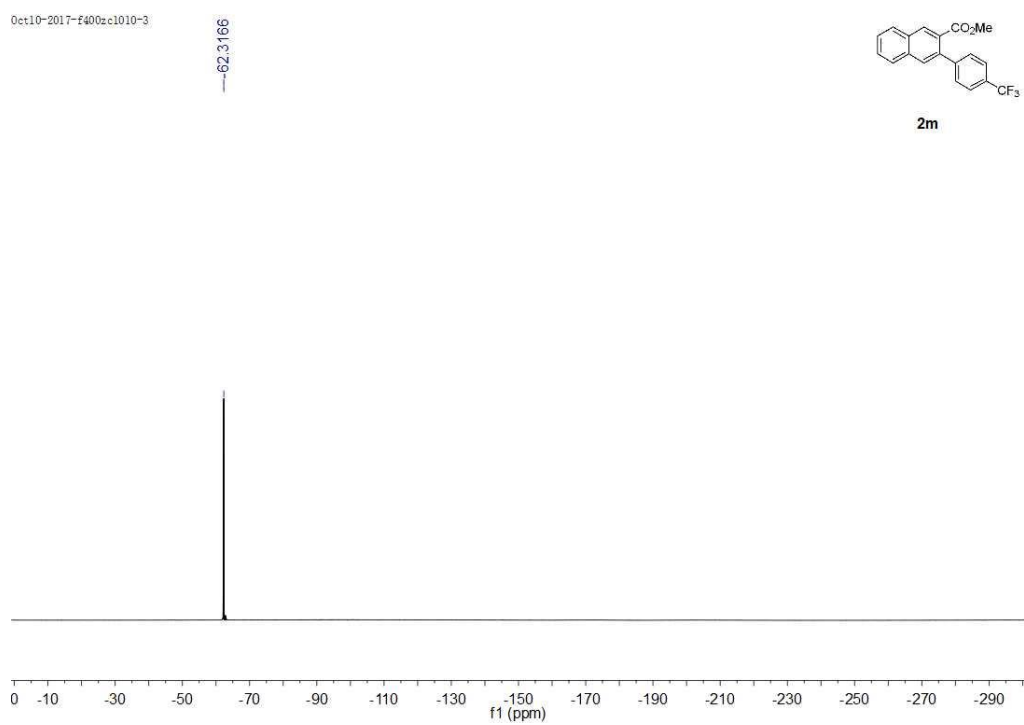

**Figure S30.** <sup>19</sup>F NMR spectra (400 MHz) of **2m** in CDCl<sub>3</sub>, related to **Scheme 1**.

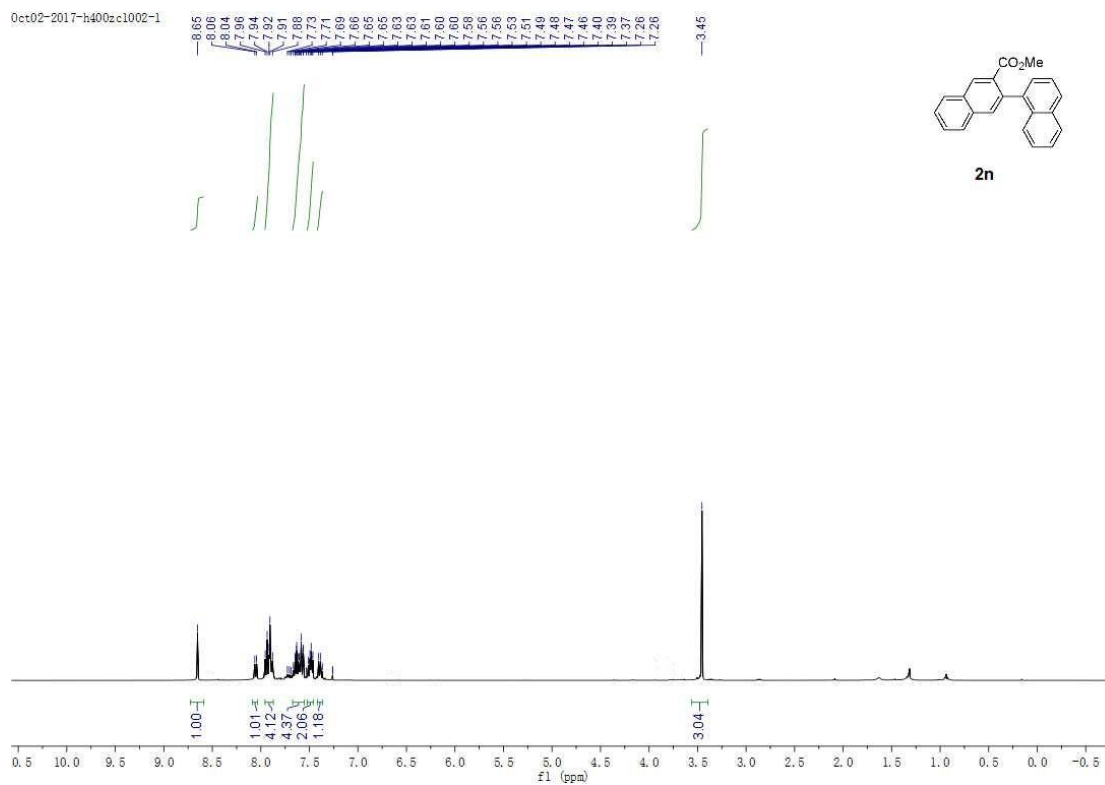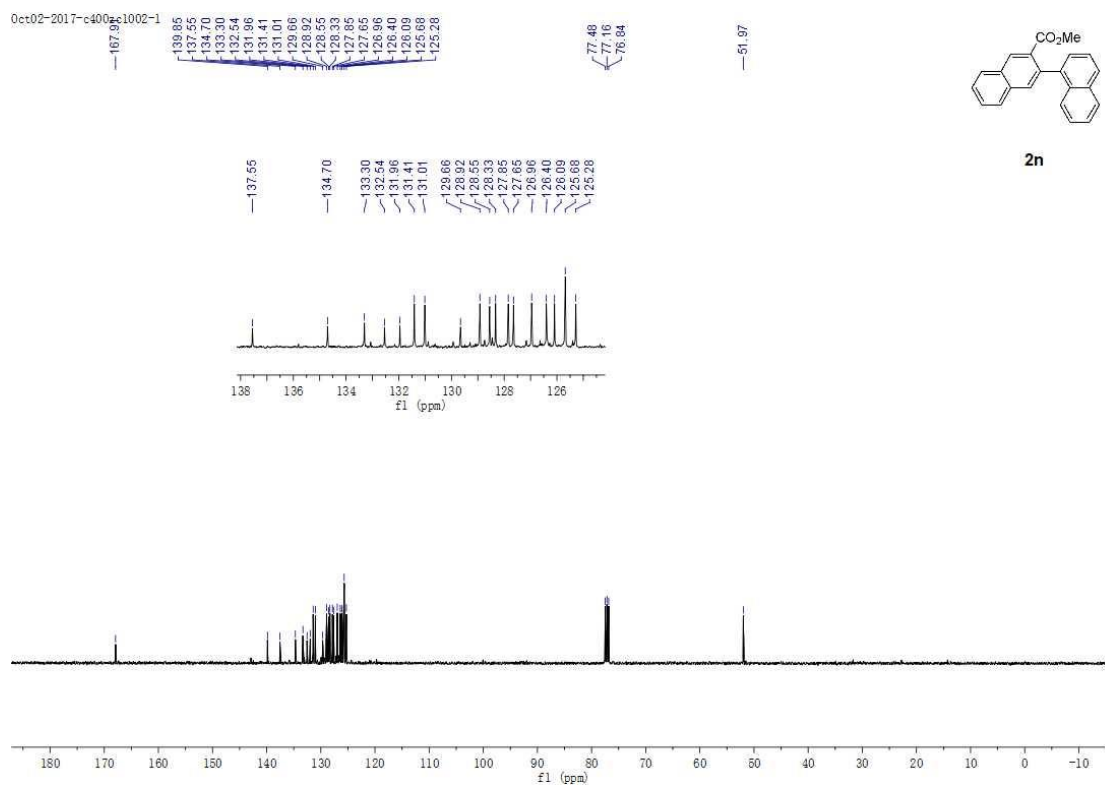

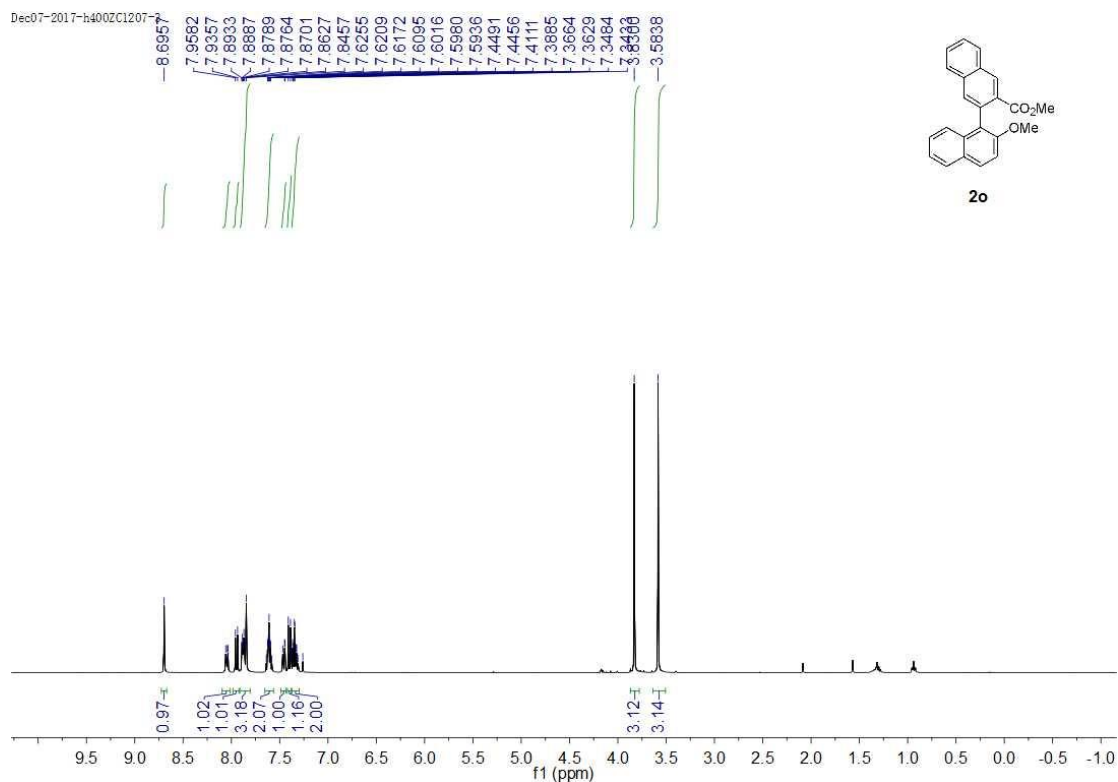

**Figure S33.** <sup>1</sup>H NMR spectra (400 MHz) of **2o** in CDCl<sub>3</sub>, related to **Scheme 1**.

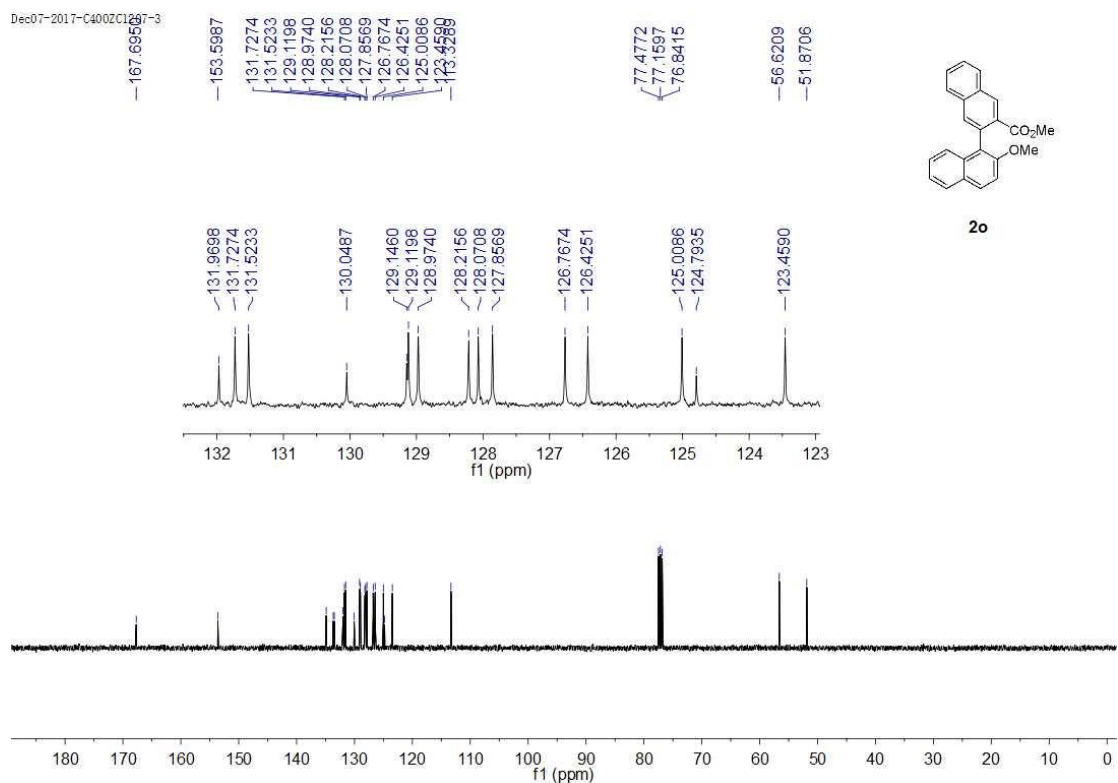

**Figure S34.** <sup>13</sup>C NMR spectra (400 MHz) of **2o** in CDCl<sub>3</sub>, related to **Scheme 1**.

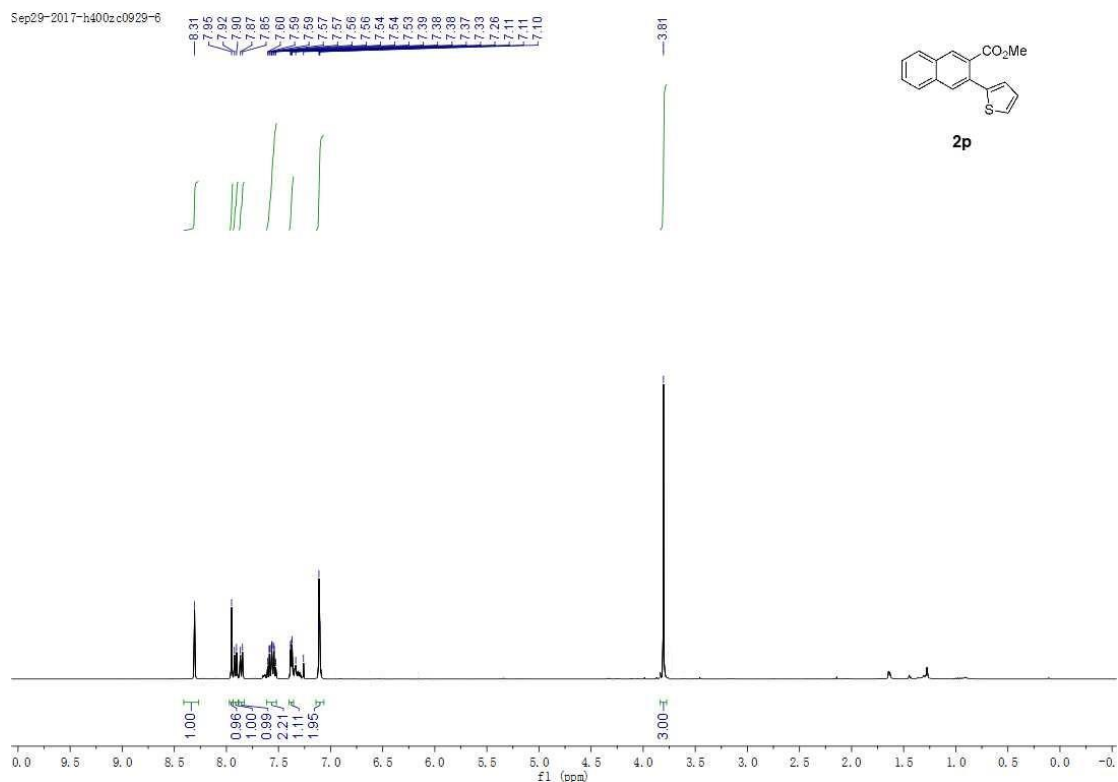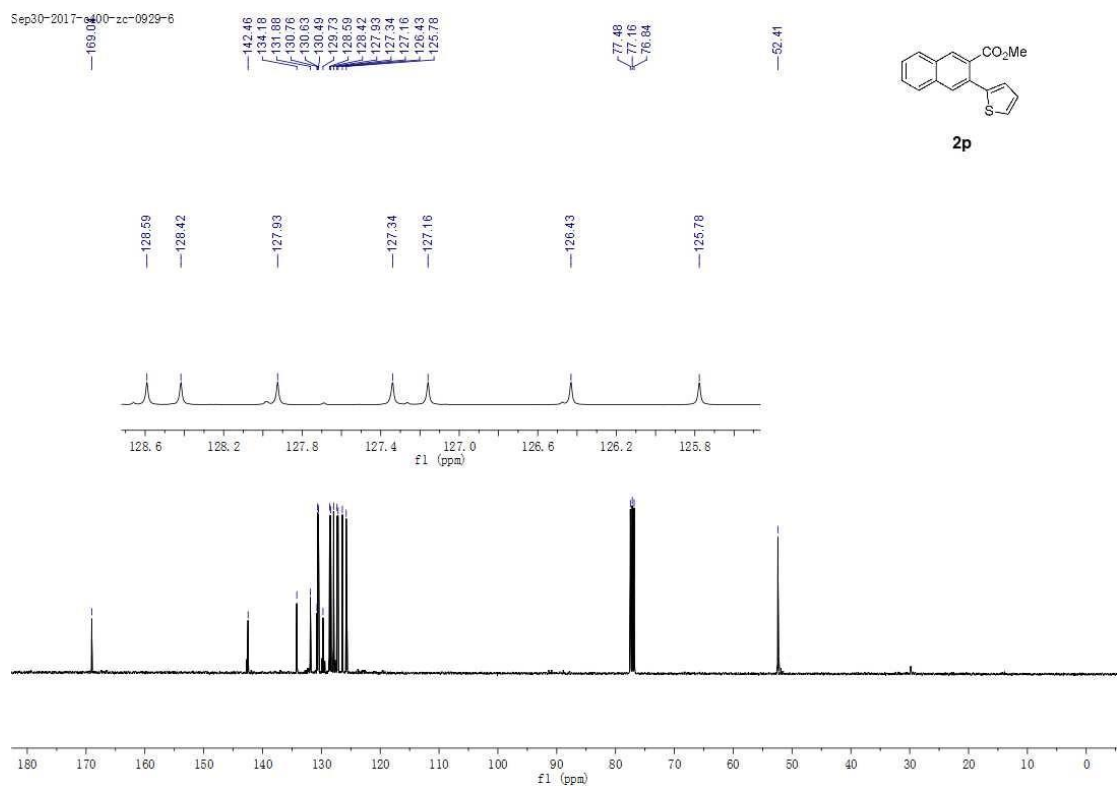

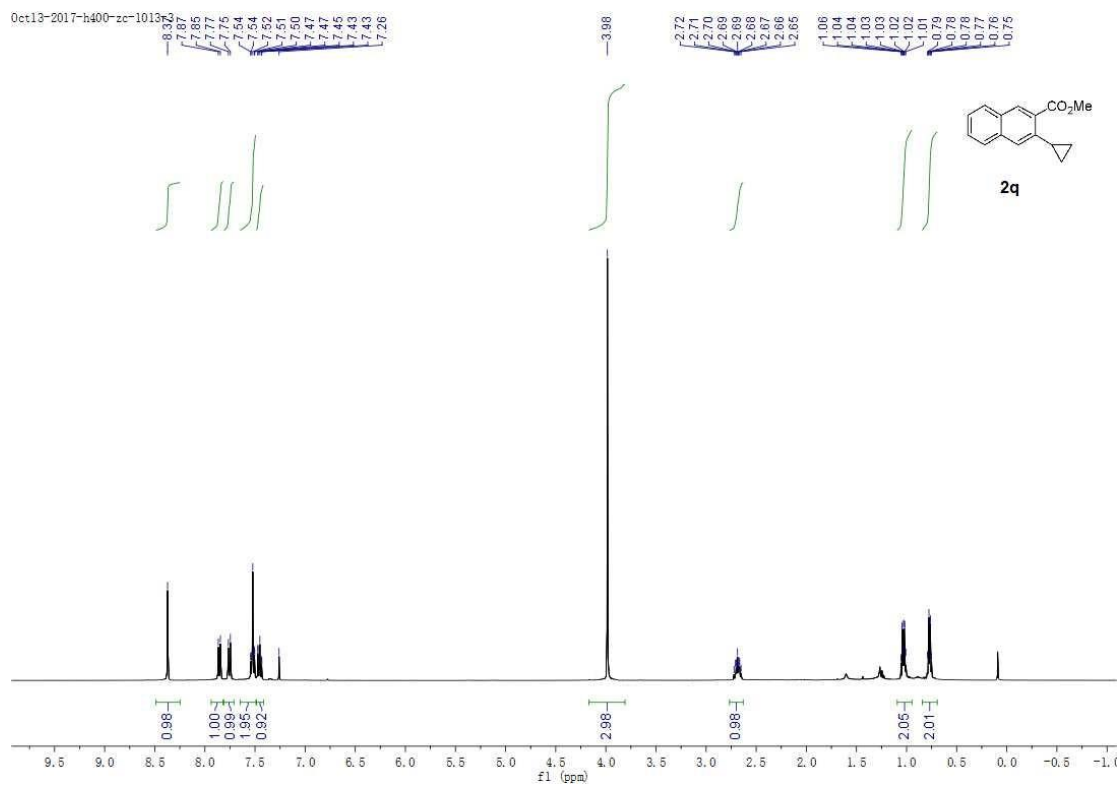

**Figure S37.** <sup>1</sup>H NMR spectra (400 MHz) of **2q** in CDCl<sub>3</sub>, related to **Scheme 1**.

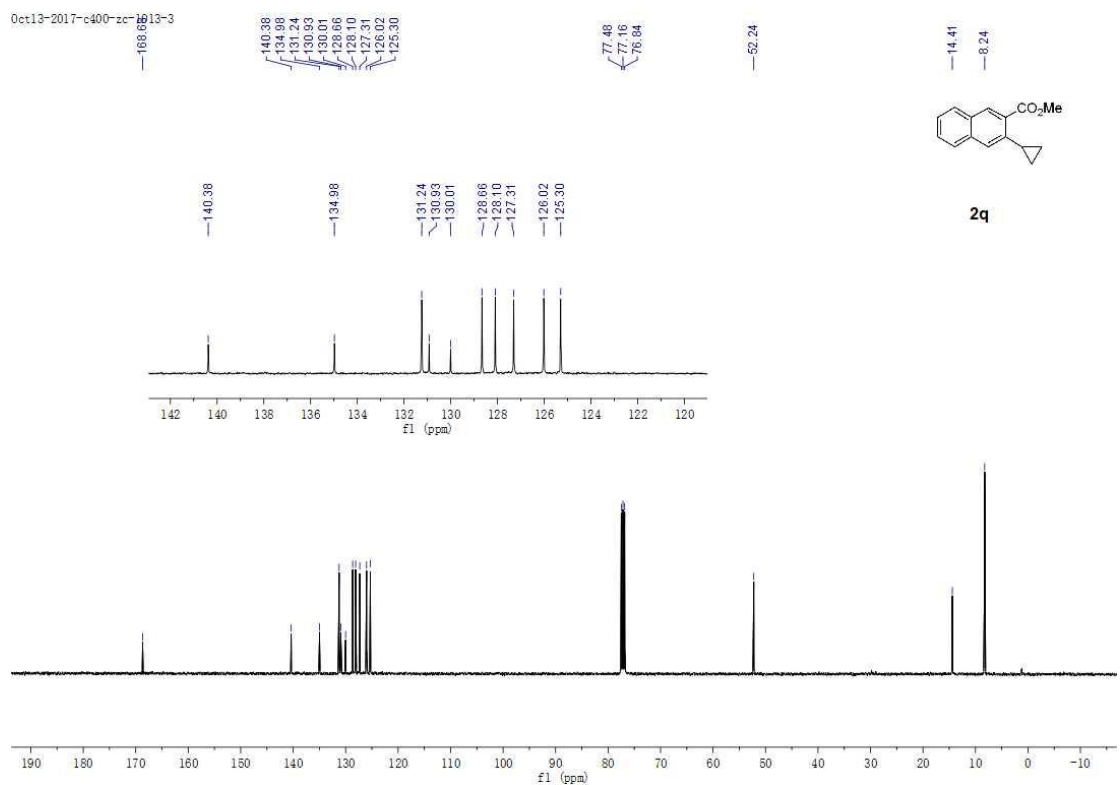

**Figure S38.** <sup>13</sup>C NMR spectra (400 MHz) of **2q** in CDCl<sub>3</sub>, related to **Scheme 1**.



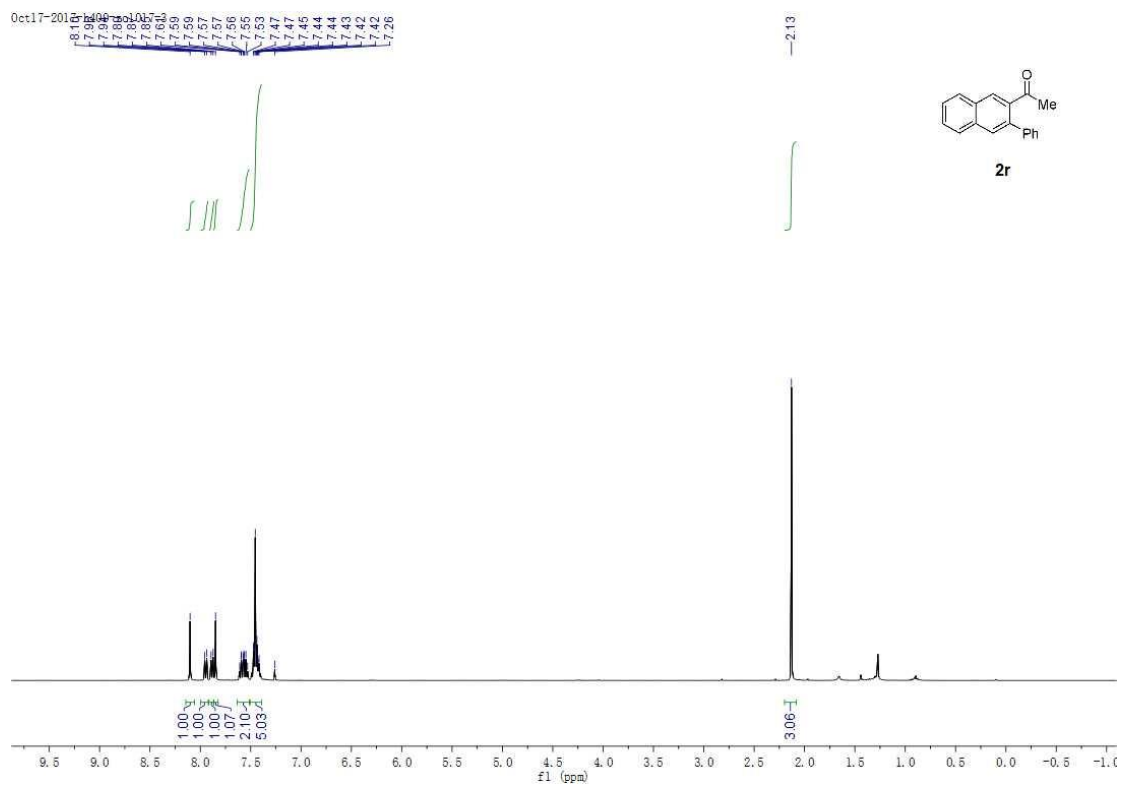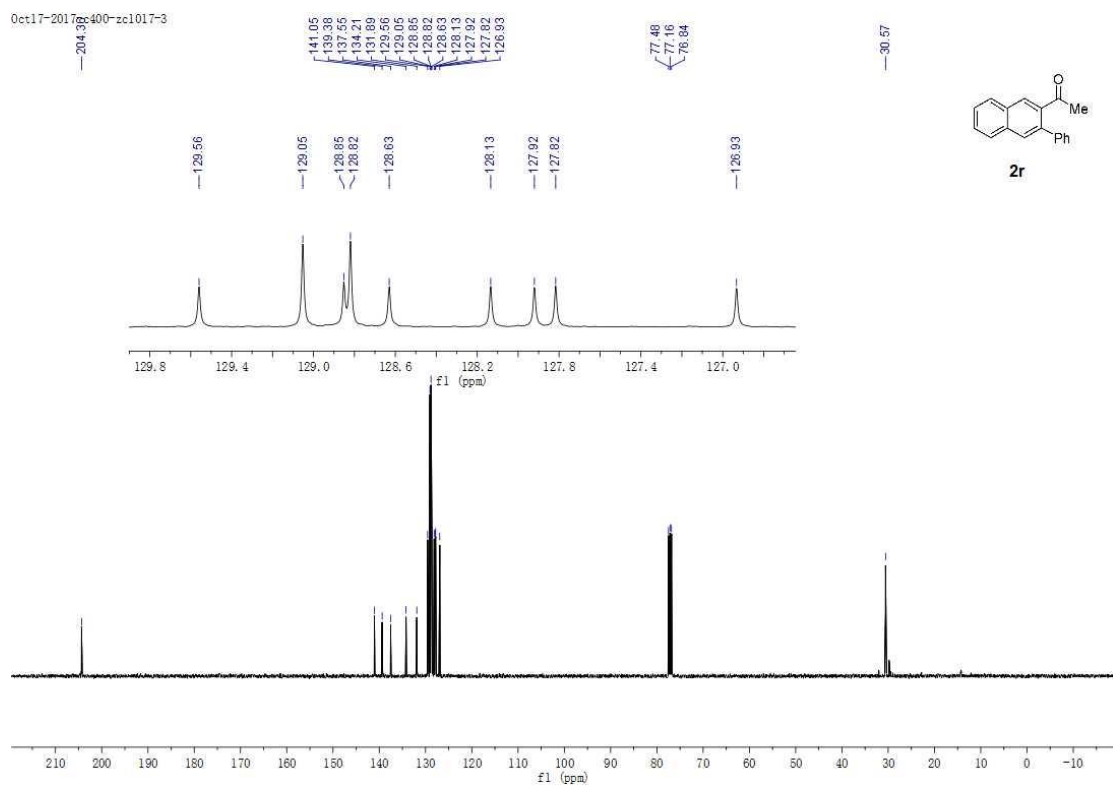

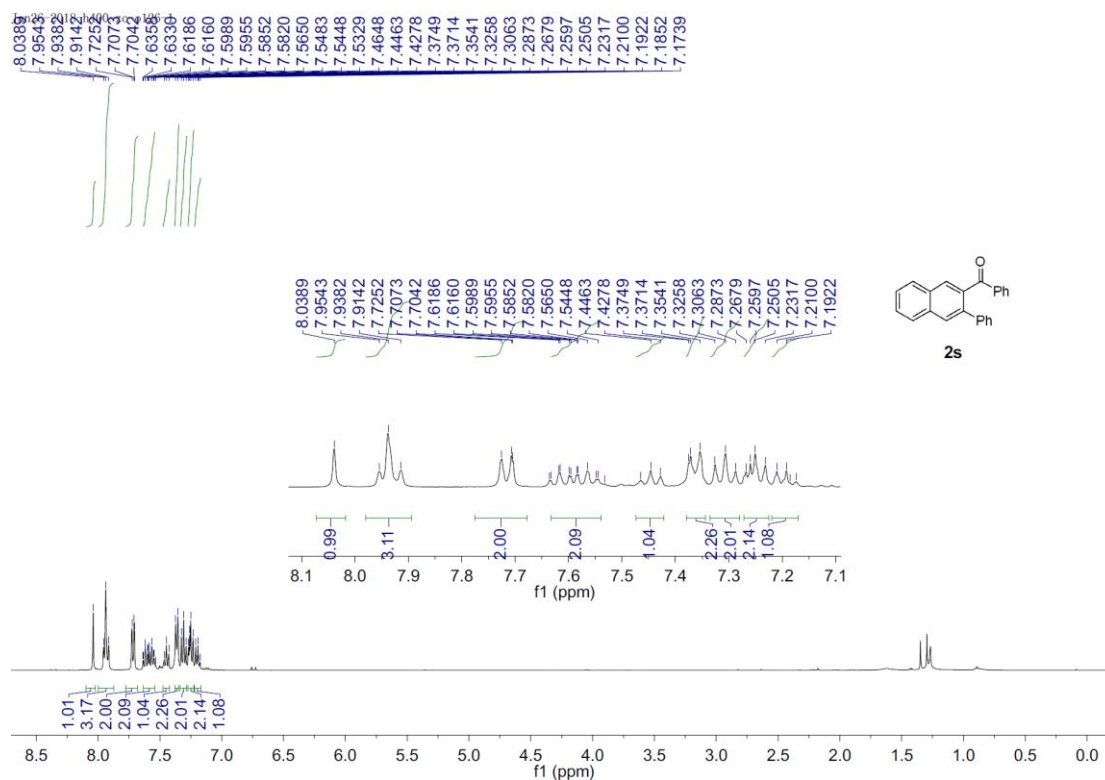

**Figure S41.**  $^1\text{H}$  NMR spectra (400 MHz) of **2s** in  $\text{CDCl}_3$ , related to **Scheme 1**.

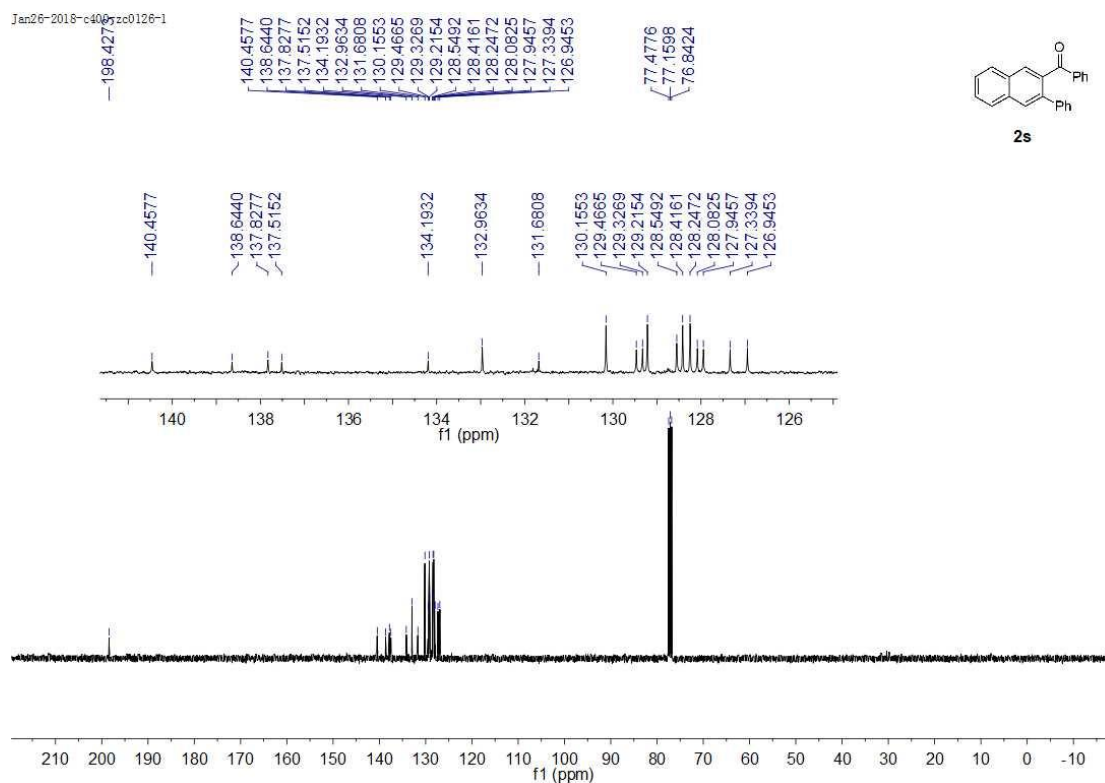

**Figure S42.**  $^{13}\text{C}$  NMR spectra (400 MHz) of **2s** in  $\text{CDCl}_3$ , related to **Scheme 1**.

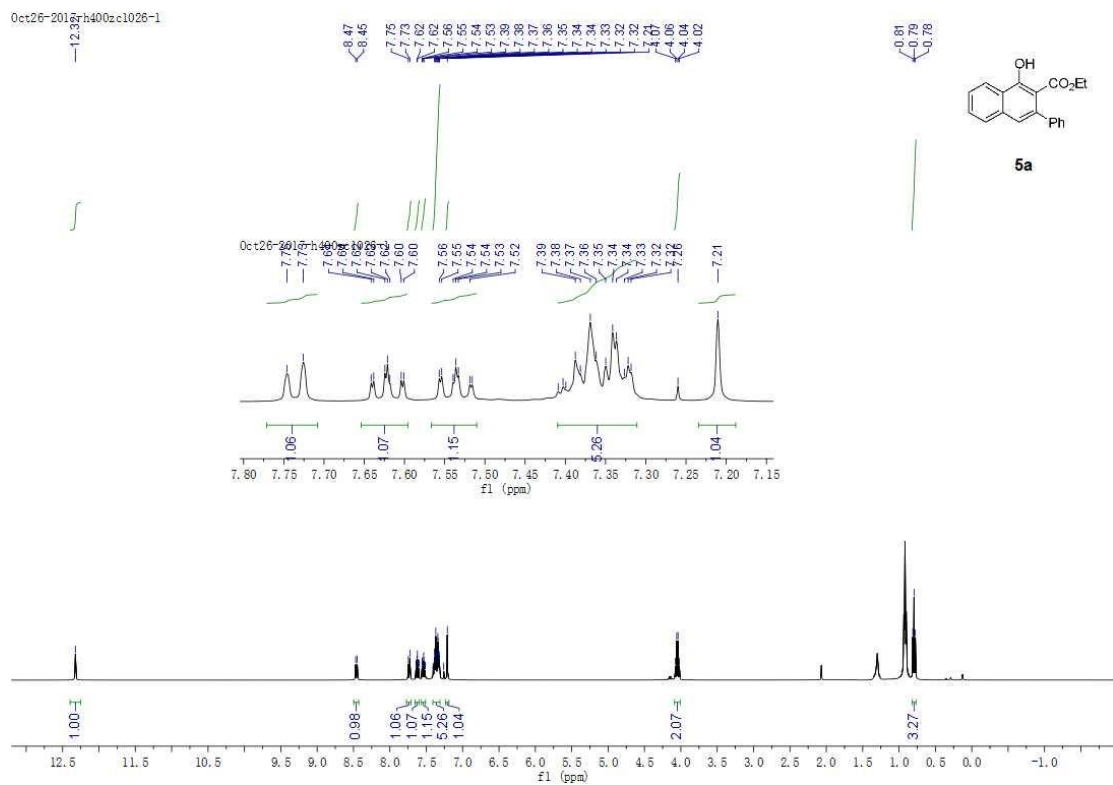

**Figure S43.** <sup>1</sup>H NMR spectra (400 MHz) of **5a** in CDCl<sub>3</sub>, related to **Scheme 1**.

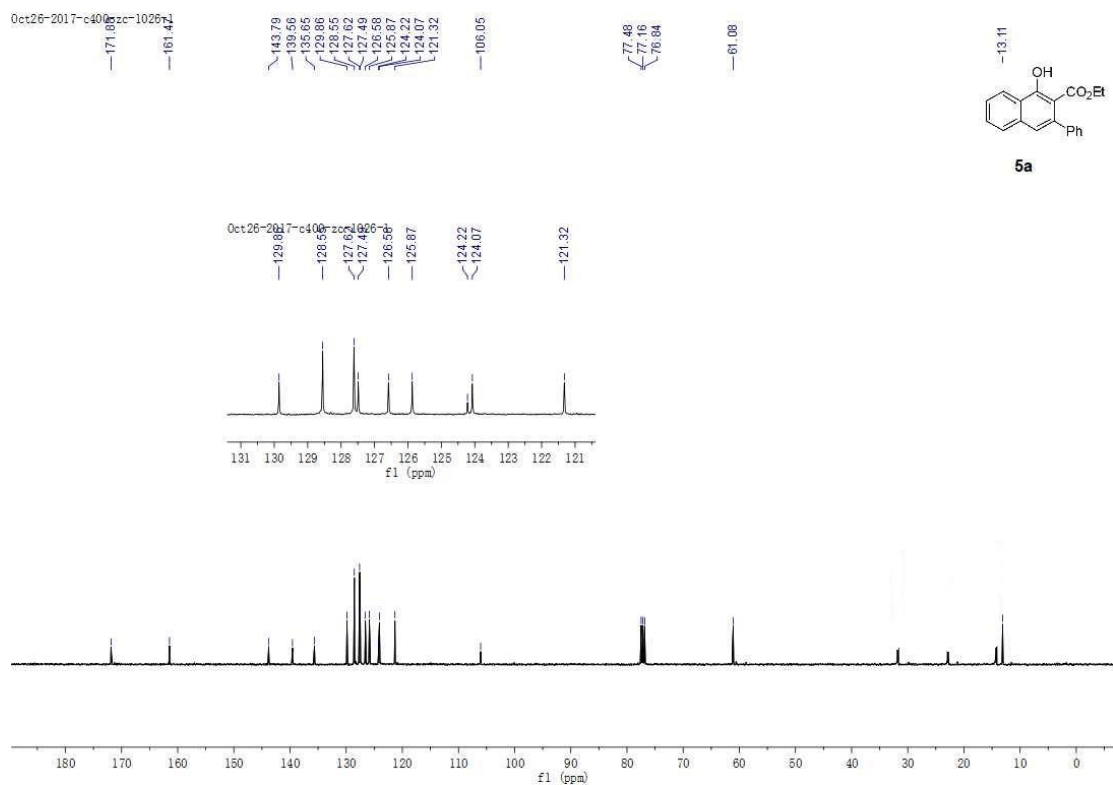

**Figure S44.** <sup>13</sup>C NMR spectra (400 MHz) of **5a** in CDCl<sub>3</sub>, related to **Scheme 1**.

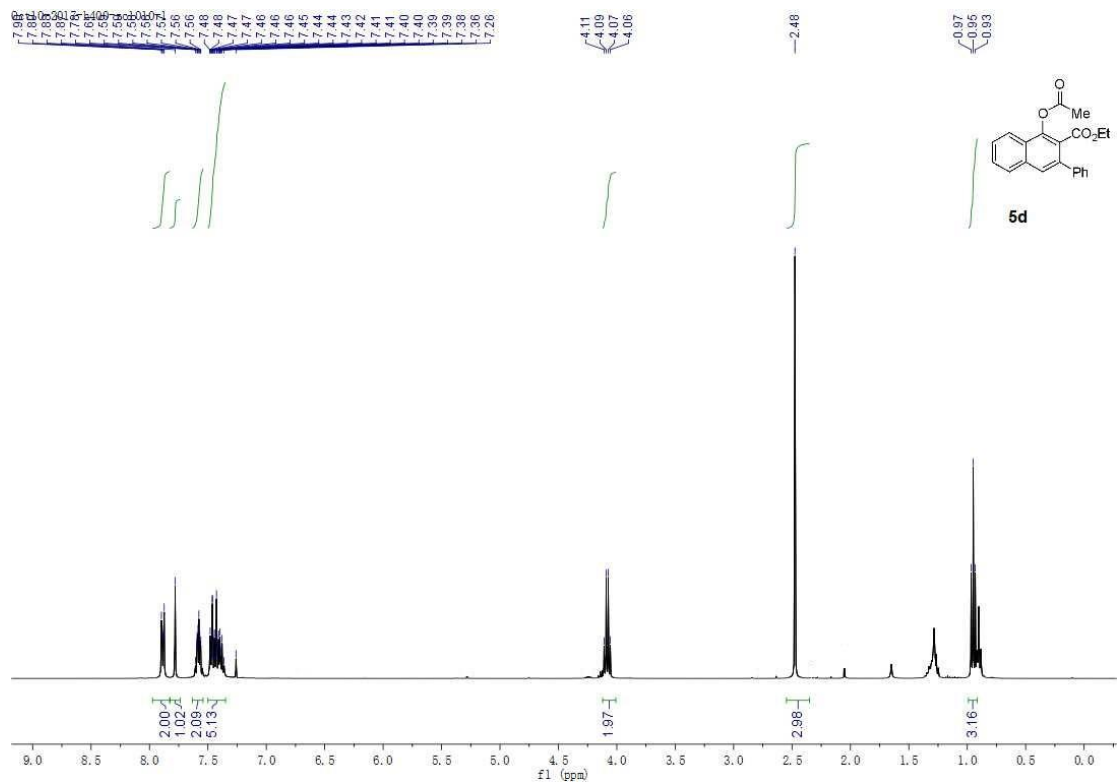

**Figure S45.** <sup>1</sup>H NMR spectra (400 MHz) of **5d** in CDCl<sub>3</sub>, related to **Scheme 1**.

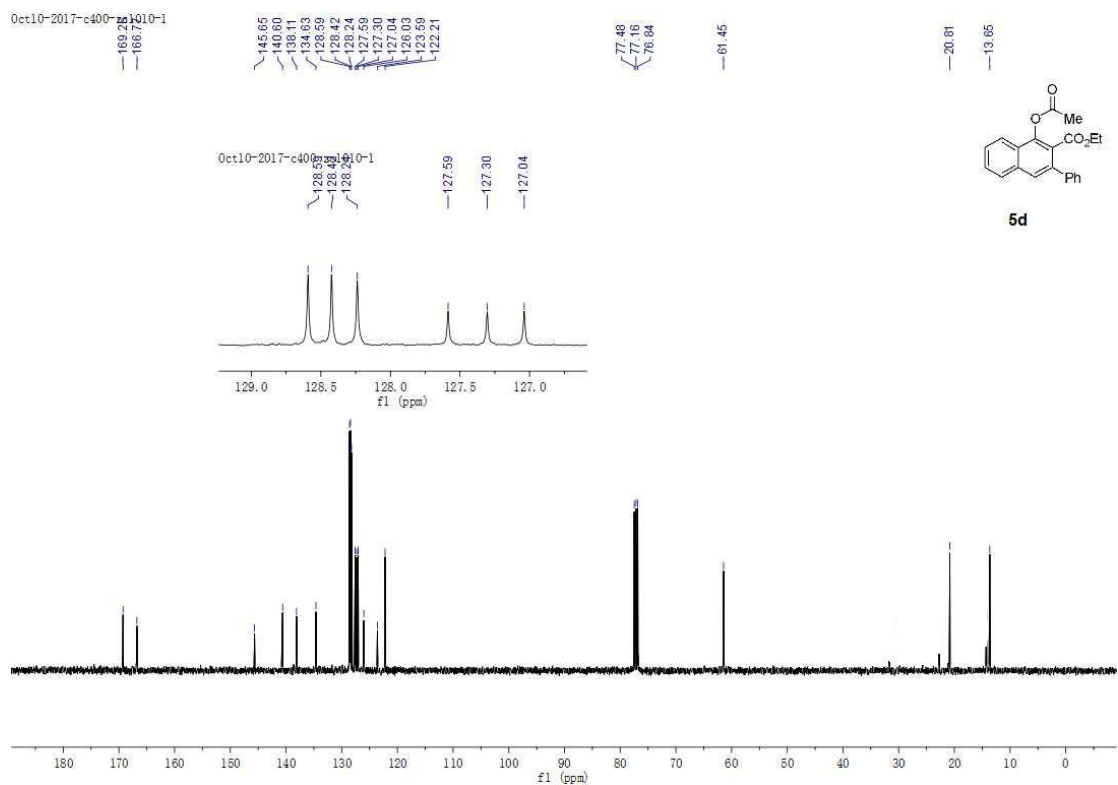

**Figure S46.** <sup>13</sup>C NMR spectra (400 MHz) of **5d** in CDCl<sub>3</sub>, related to **Scheme 1**.

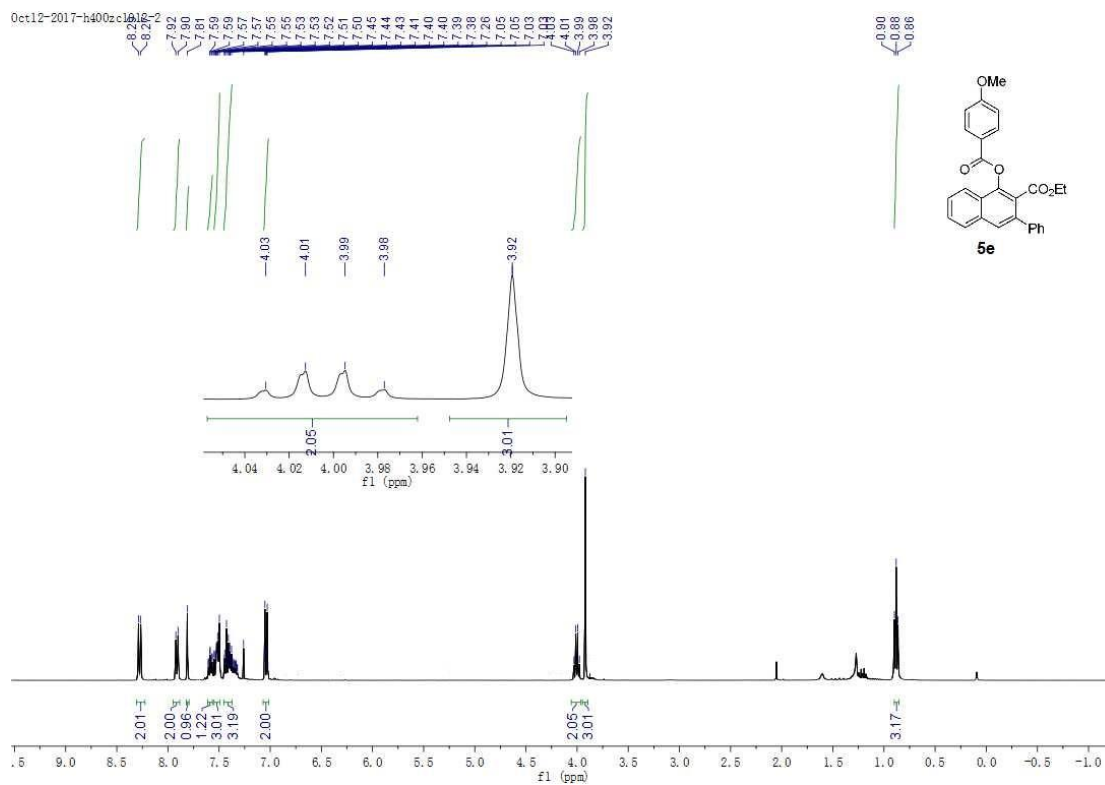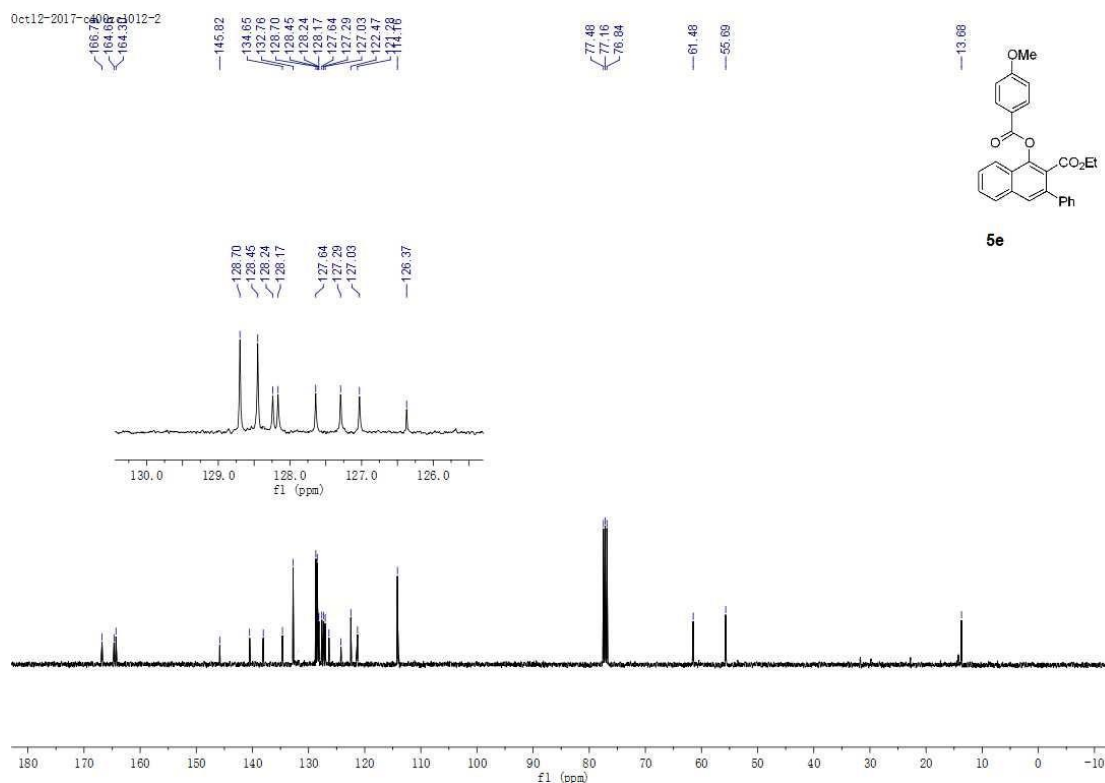

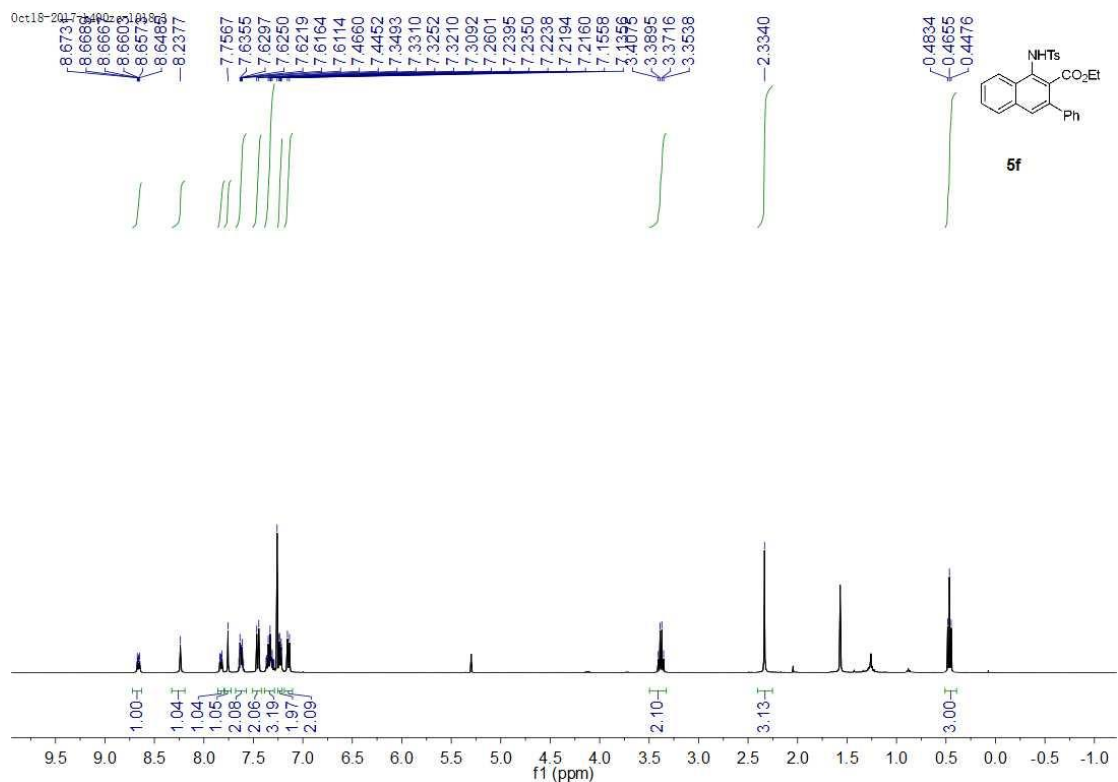

**Figure S49.** <sup>1</sup>H NMR spectra (400 MHz) of **5f** in CDCl<sub>3</sub>, related to **Scheme 1**.

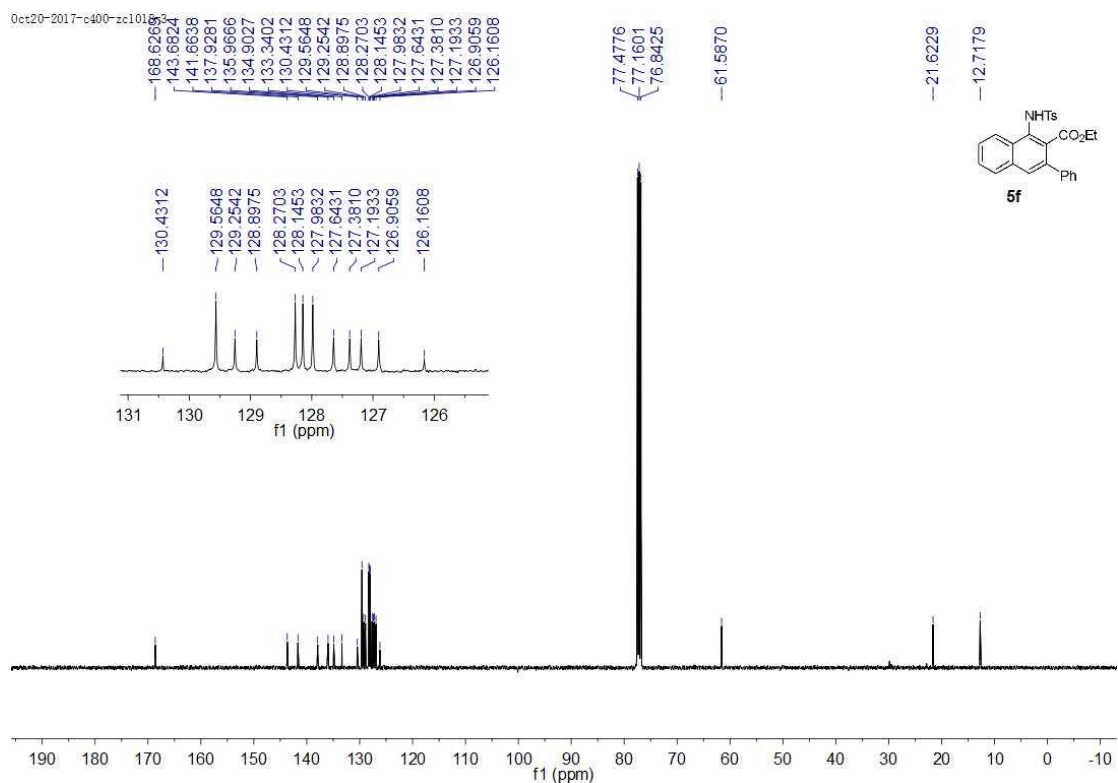

**Figure S50.** <sup>13</sup>C NMR spectra (400 MHz) of **5f** in CDCl<sub>3</sub>, related to **Scheme 1**.

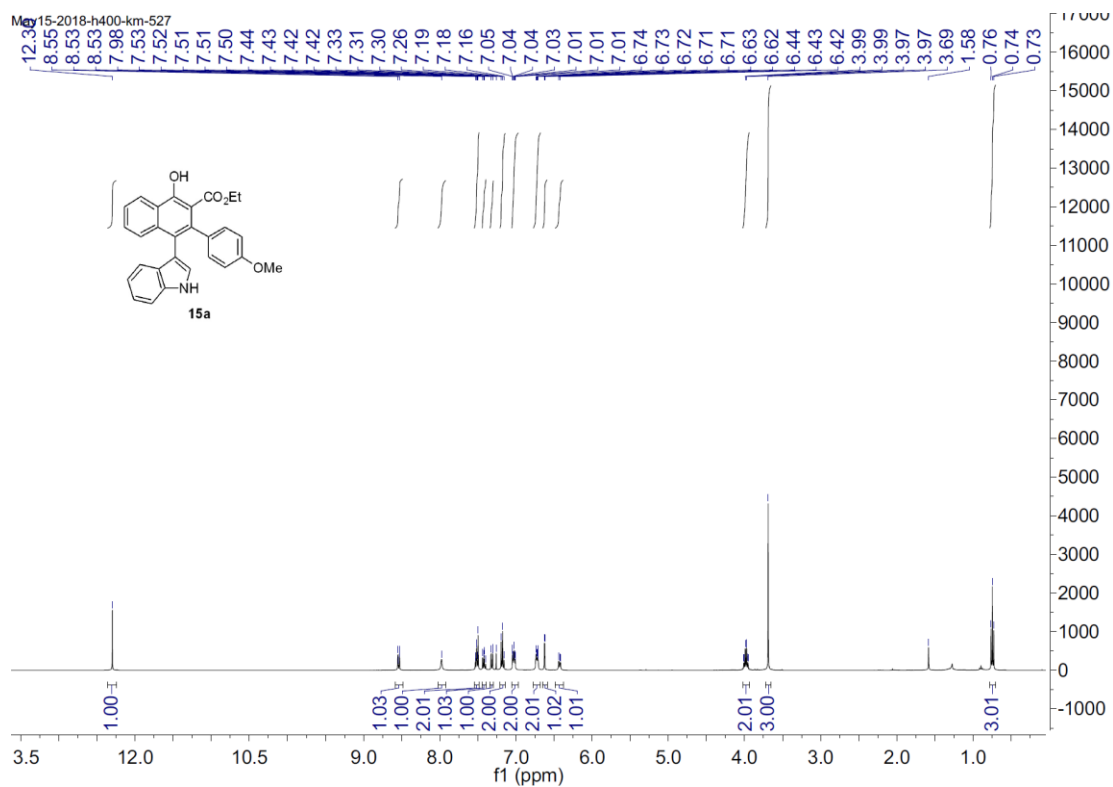

**Figure S51.**  $^1\text{H}$  NMR spectra (400 MHz) of **15a** in  $\text{CDCl}_3$ , related to **Scheme 1**.

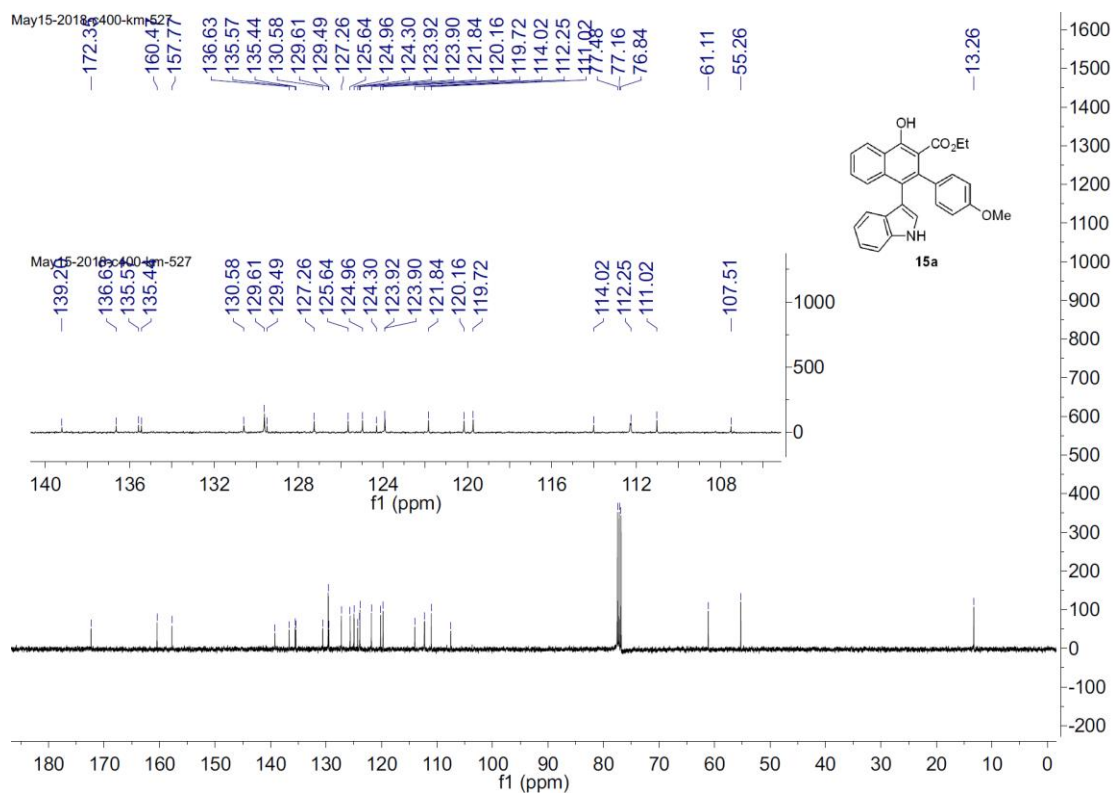

**Figure S52.**  $^{13}\text{C}$  NMR spectra (400 MHz) of **15a** in  $\text{CDCl}_3$ , related to **Scheme 1**.



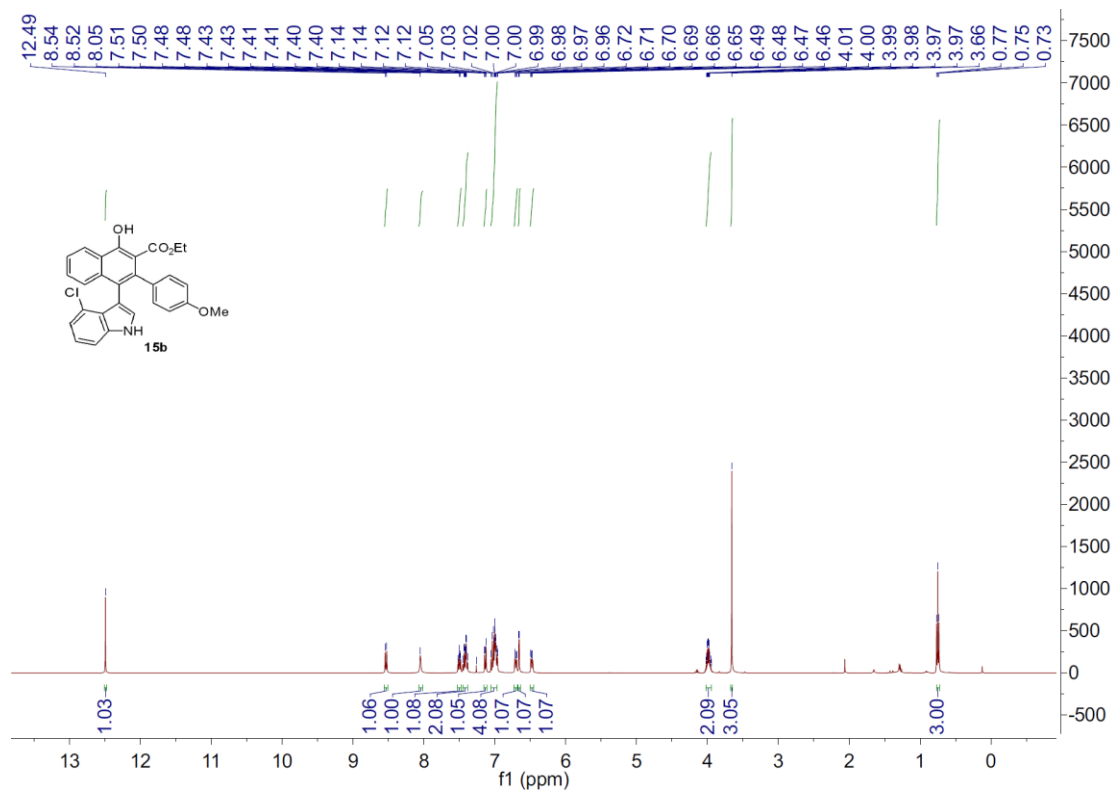

**Figure S53.** <sup>1</sup>H NMR spectra (400 MHz) of **15b** in CDCl<sub>3</sub>, related to **Scheme 1**.

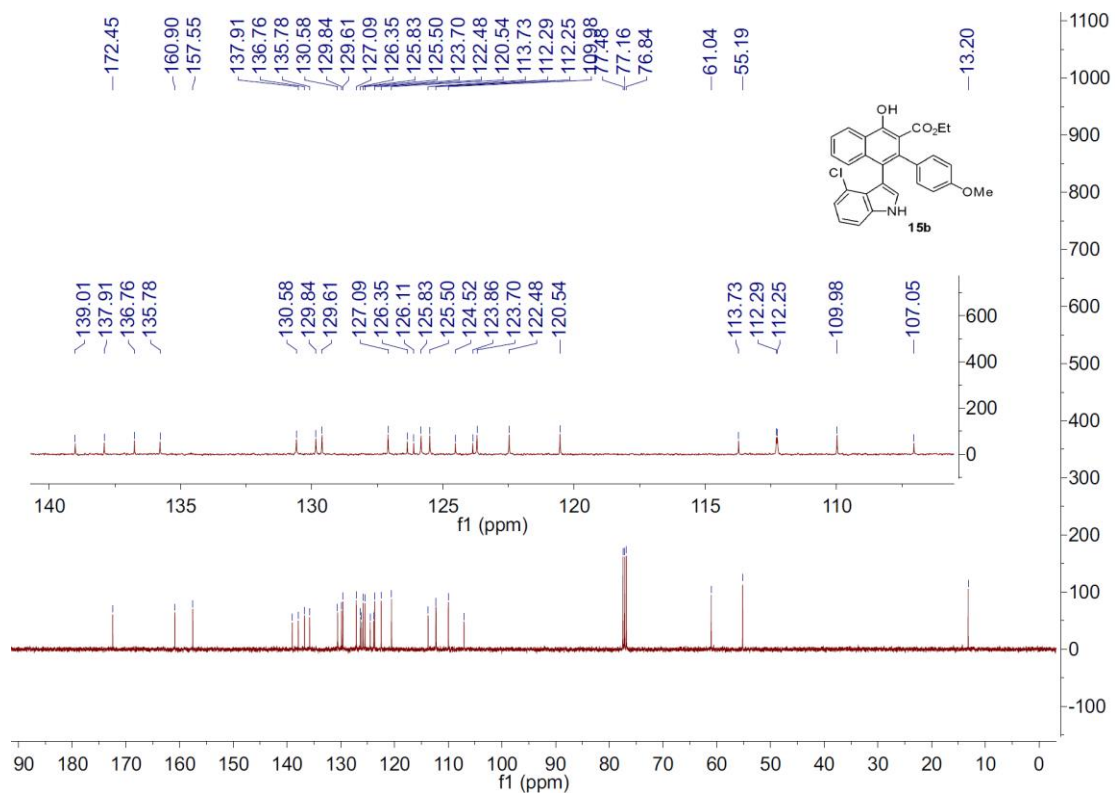

**Figure S54.** <sup>13</sup>C NMR spectra (400 MHz) of **15b** in CDCl<sub>3</sub>, related to **Scheme 1**.



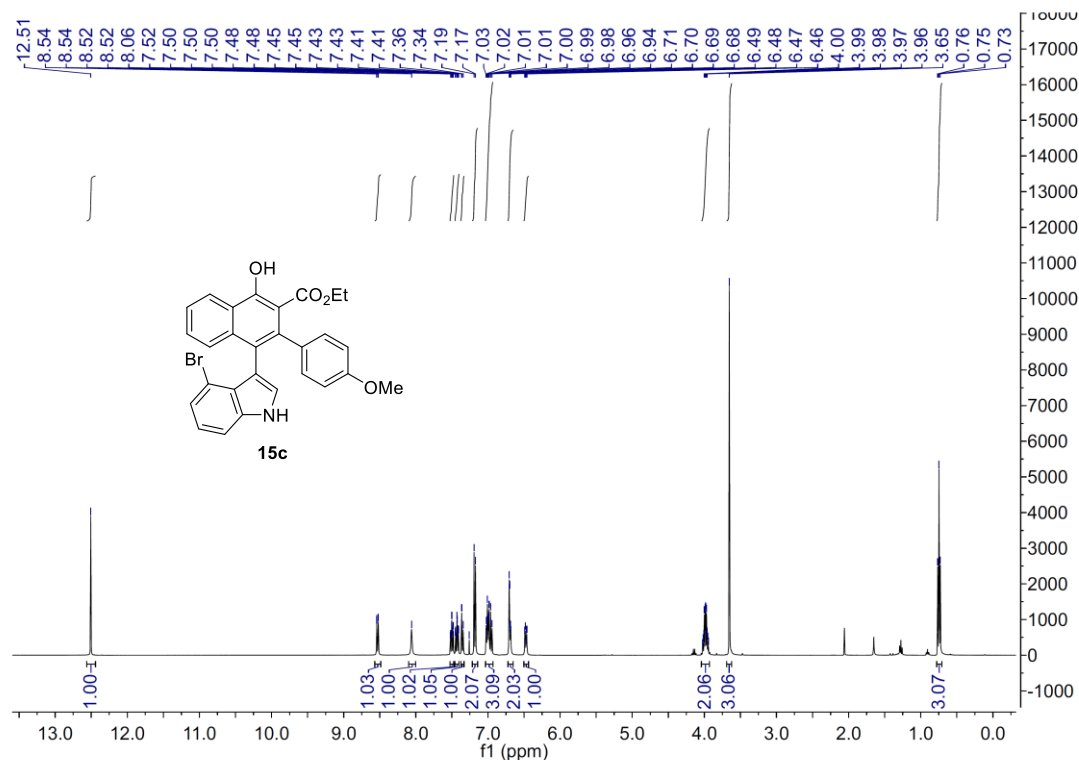

**Figure S55.** <sup>1</sup>H NMR spectra (400 MHz) of **15c** in CDCl<sub>3</sub>, related to **Scheme 1**.

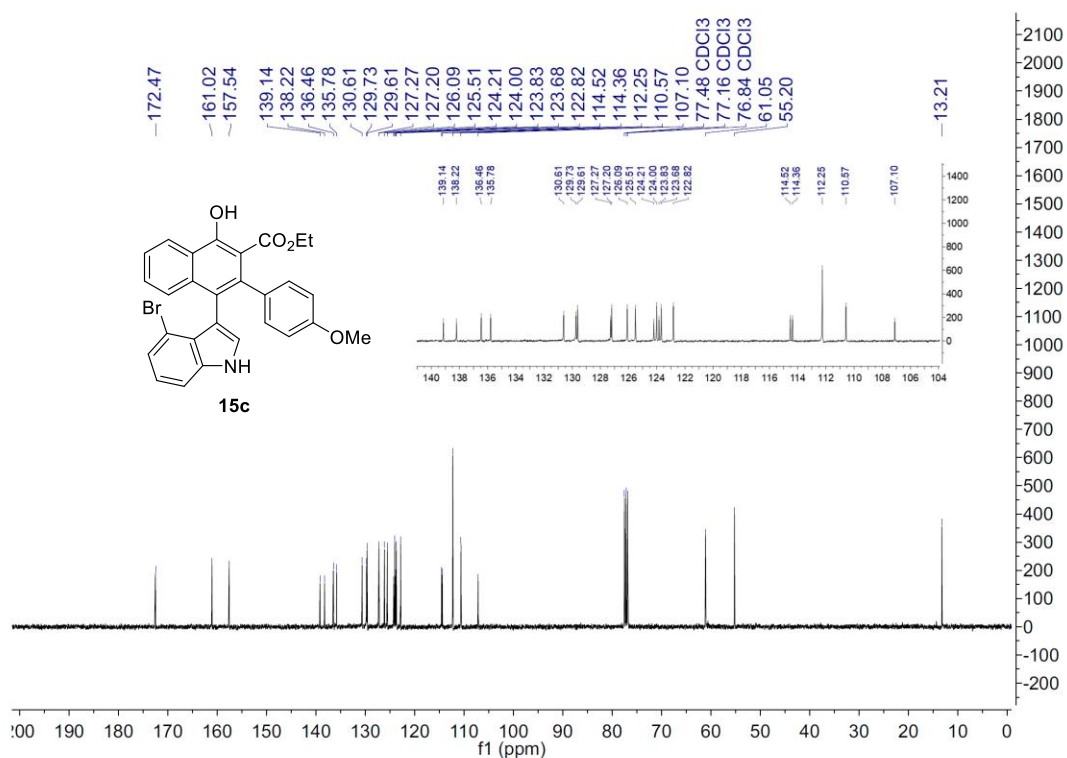

**Figure S56.** <sup>13</sup>C NMR spectra (400 MHz) of **15c** in CDCl<sub>3</sub>, related to **Scheme 1**.

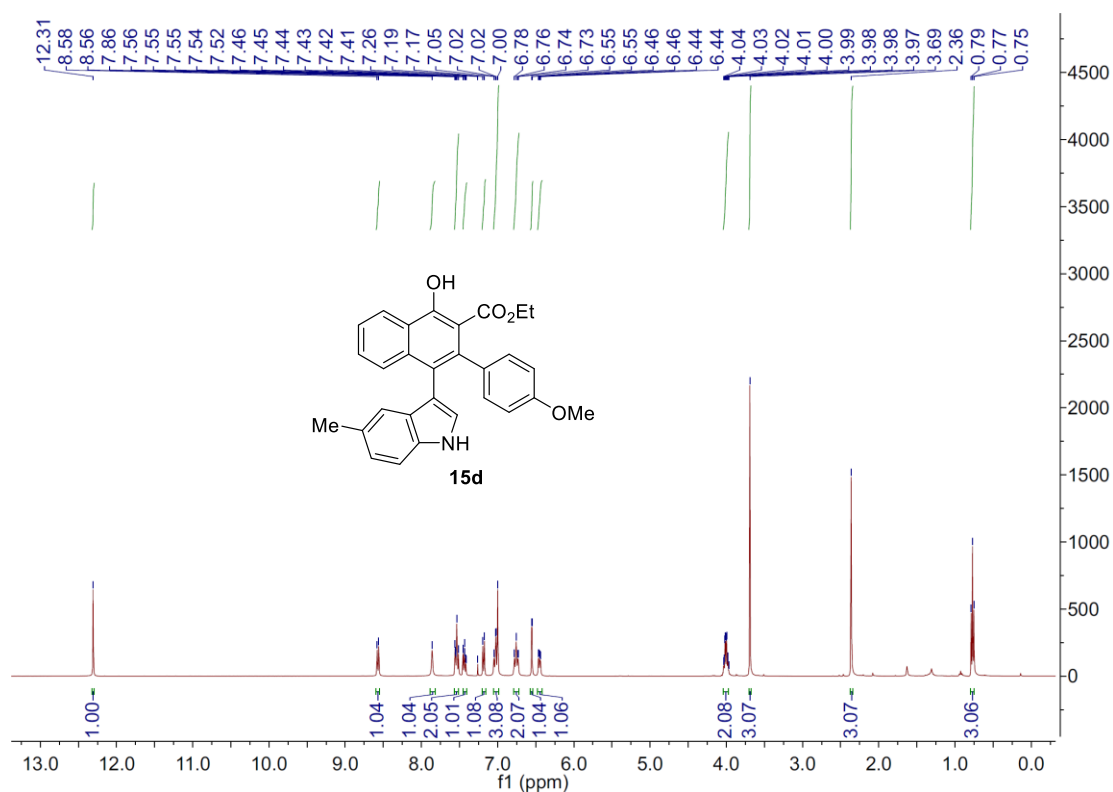

**Figure S57.** <sup>1</sup>H NMR spectra (400 MHz) of **15d** in CDCl<sub>3</sub>, related to **Scheme 1**.

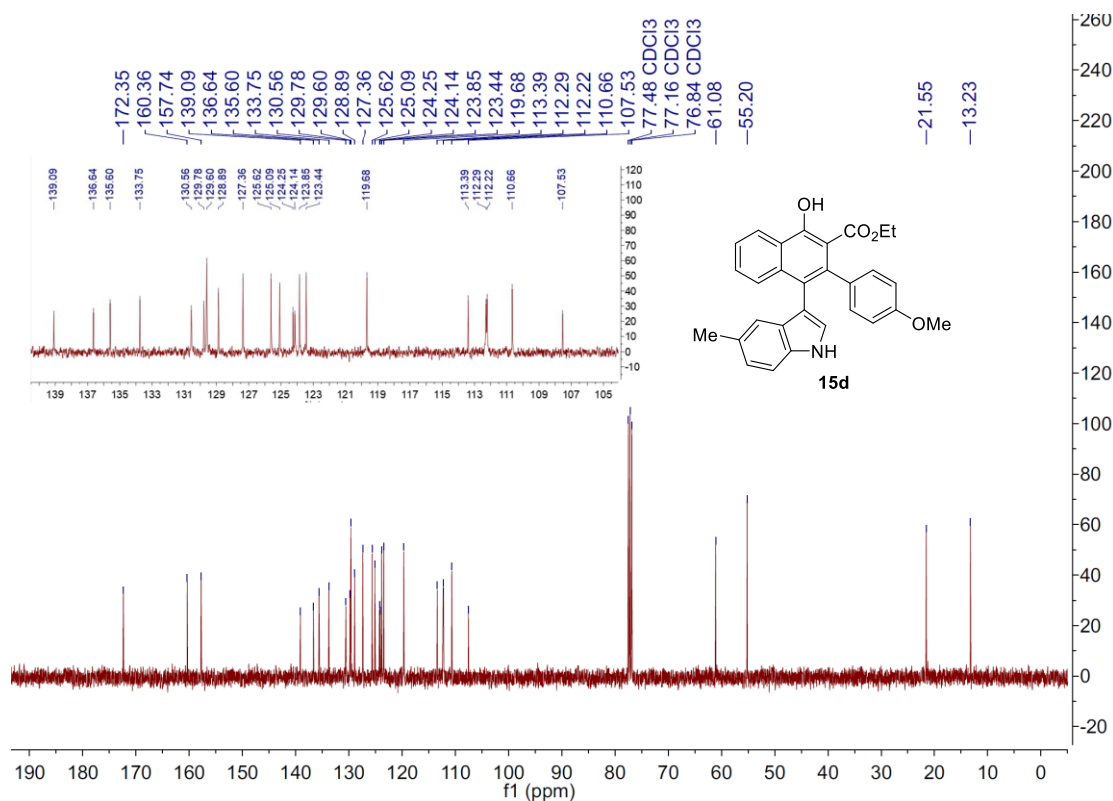

**Figure S58.** <sup>13</sup>C NMR spectra (400 MHz) of **15d** in CDCl<sub>3</sub>, related to **Scheme 1**.

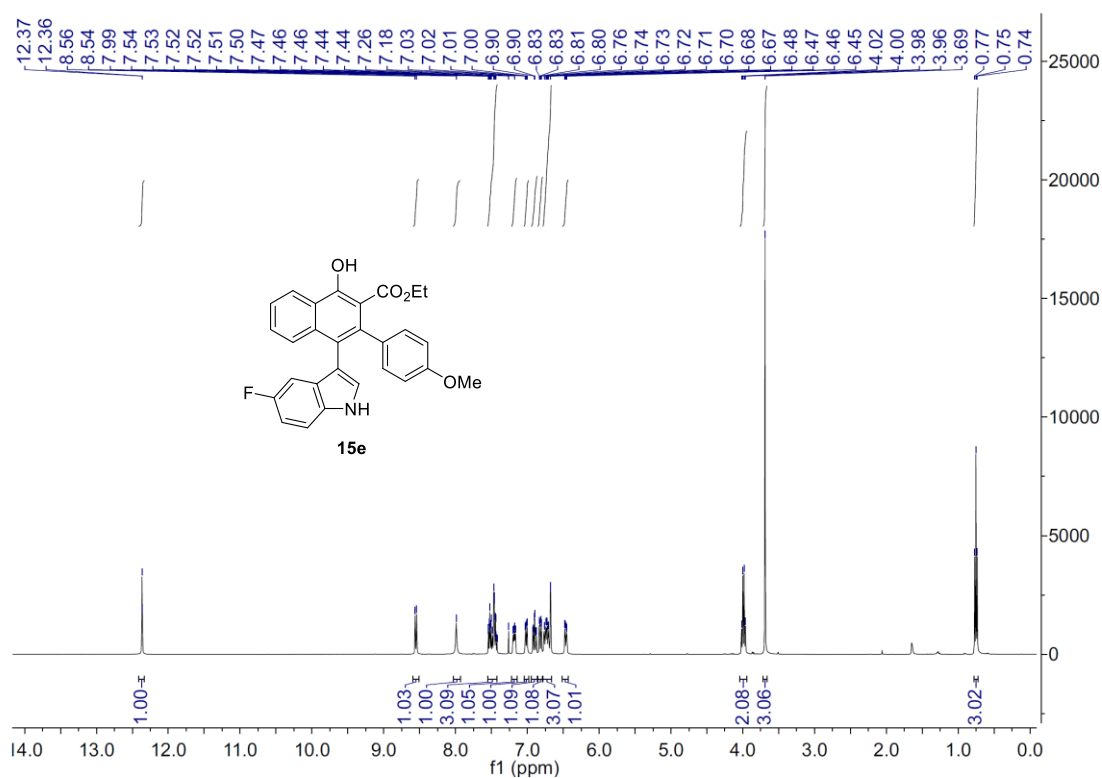

**Figure S59.** <sup>1</sup>H NMR spectra (400 MHz) of **15e** in CDCl<sub>3</sub>, related to **Scheme 1**.

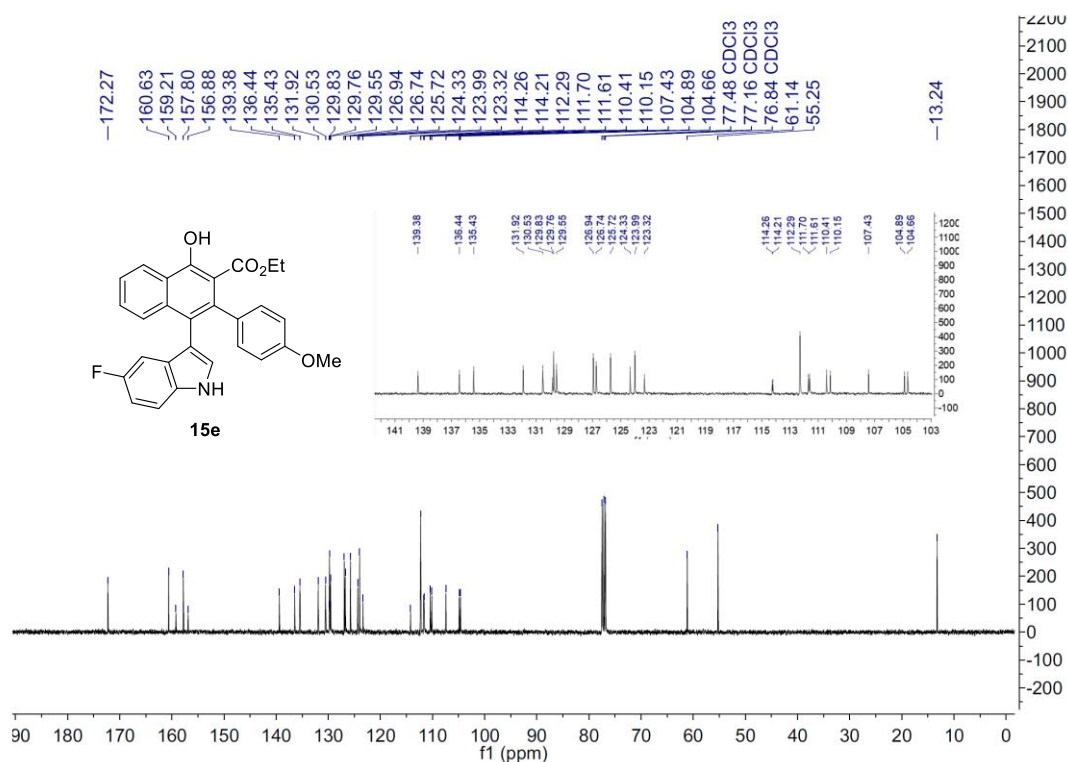

**Figure S60.** <sup>13</sup>C NMR spectra (400 MHz) of **15e** in CDCl<sub>3</sub>, related to **Scheme 1**.

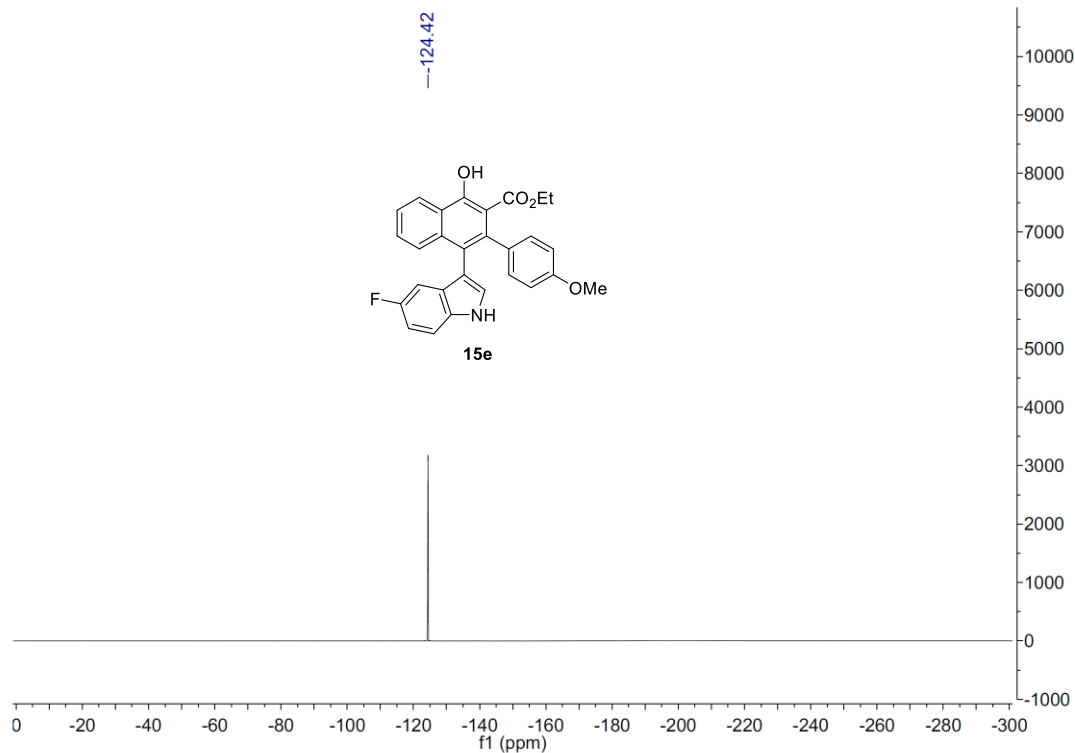

**Figure S61.** <sup>19</sup>F NMR spectra (400 MHz) of **15e** in CDCl<sub>3</sub>, related to **Scheme 1**.

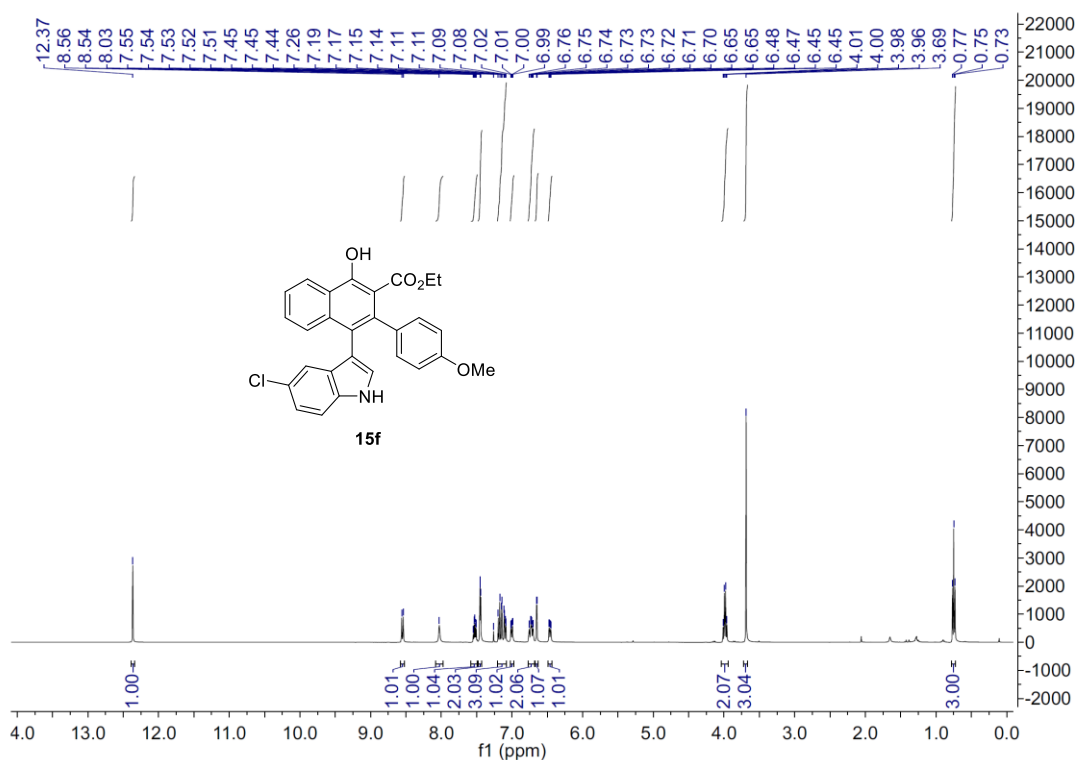

**Figure S62.** <sup>1</sup>H NMR spectra (400 MHz) of **15f** in CDCl<sub>3</sub>, related to **Scheme 1**.

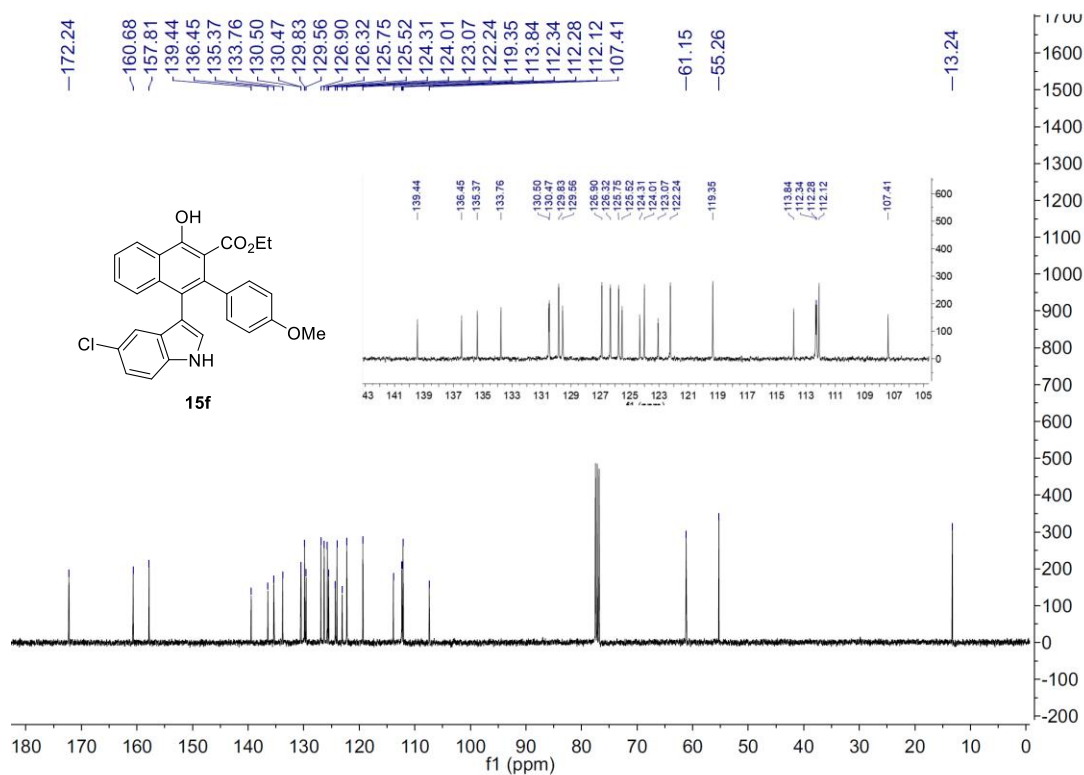

**Figure S63.** <sup>13</sup>C NMR spectra (400 MHz) of **15f** in CDCl<sub>3</sub>, related to **Scheme 1**.

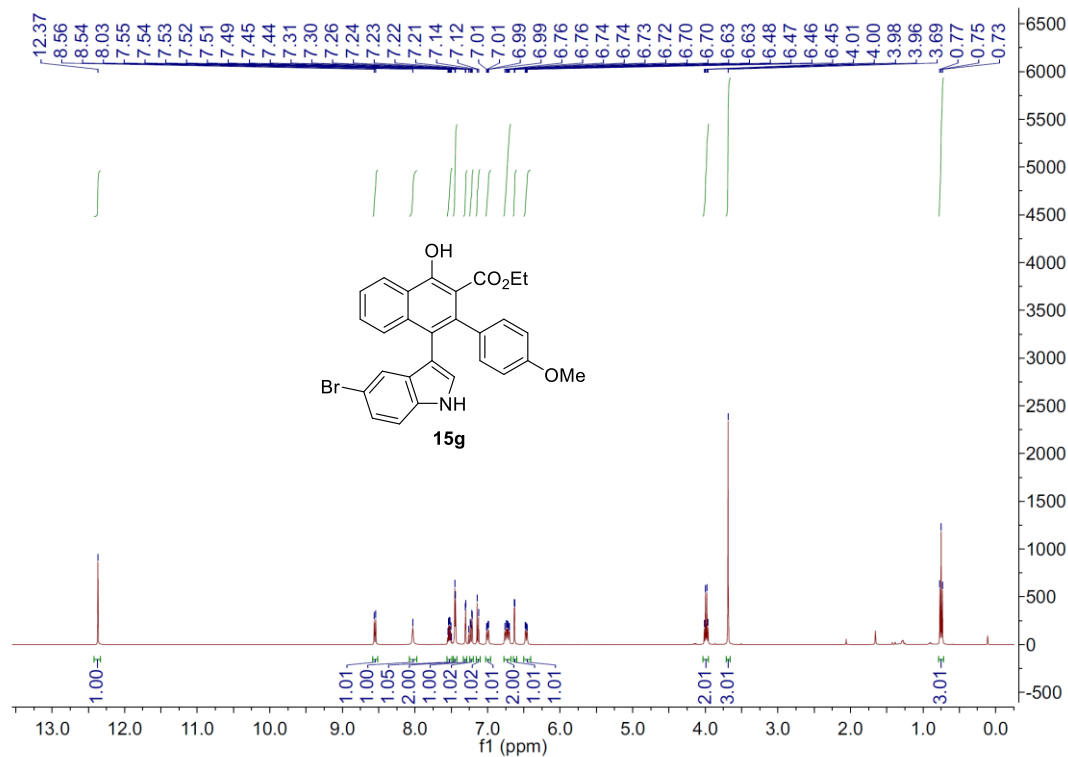

**Figure S64.** <sup>1</sup>H NMR spectra (400 MHz) of **15g** in CDCl<sub>3</sub>, related to **Scheme 1**.

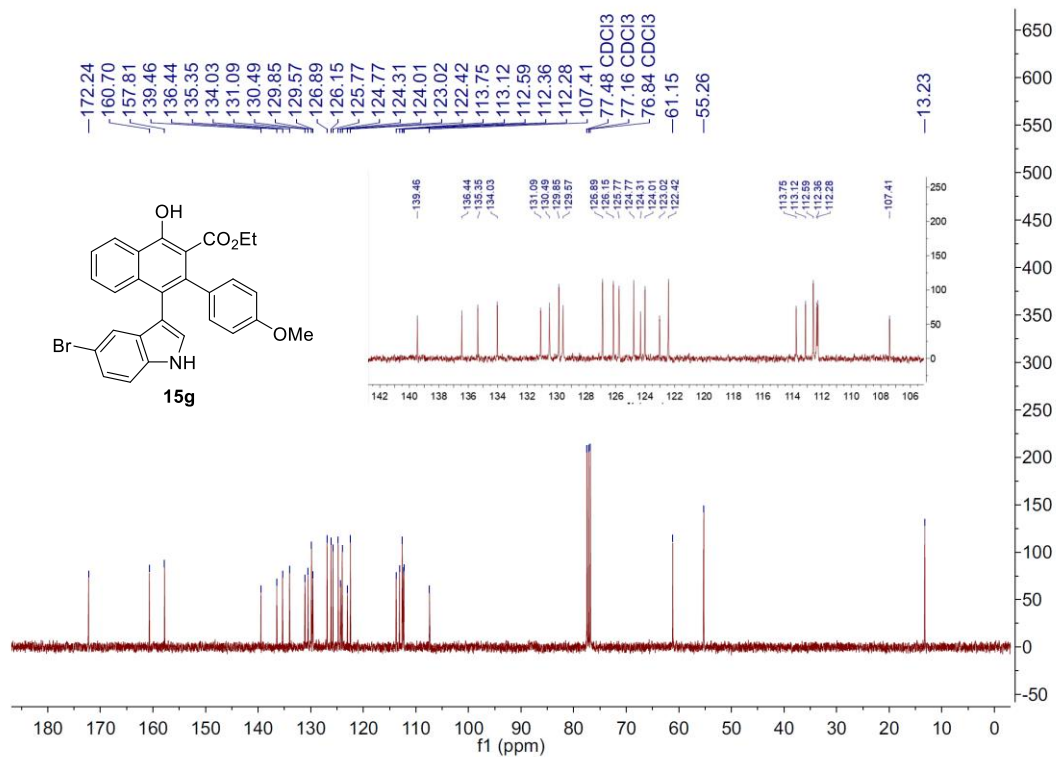

**Figure S65.** <sup>13</sup>C NMR spectra (400 MHz) of **15g** in CDCl<sub>3</sub>, related to **Scheme 1**.

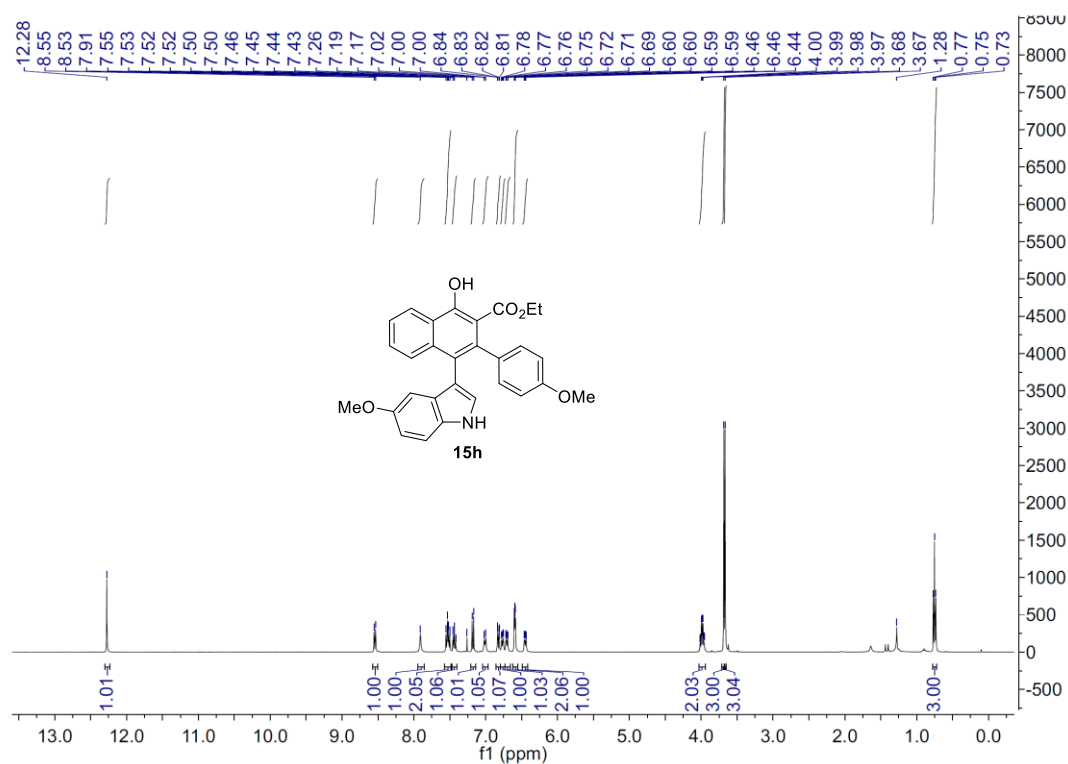

**Figure S66.** <sup>1</sup>H NMR spectra (400 MHz) of **15h** in CDCl<sub>3</sub>, related to **Scheme 1**.

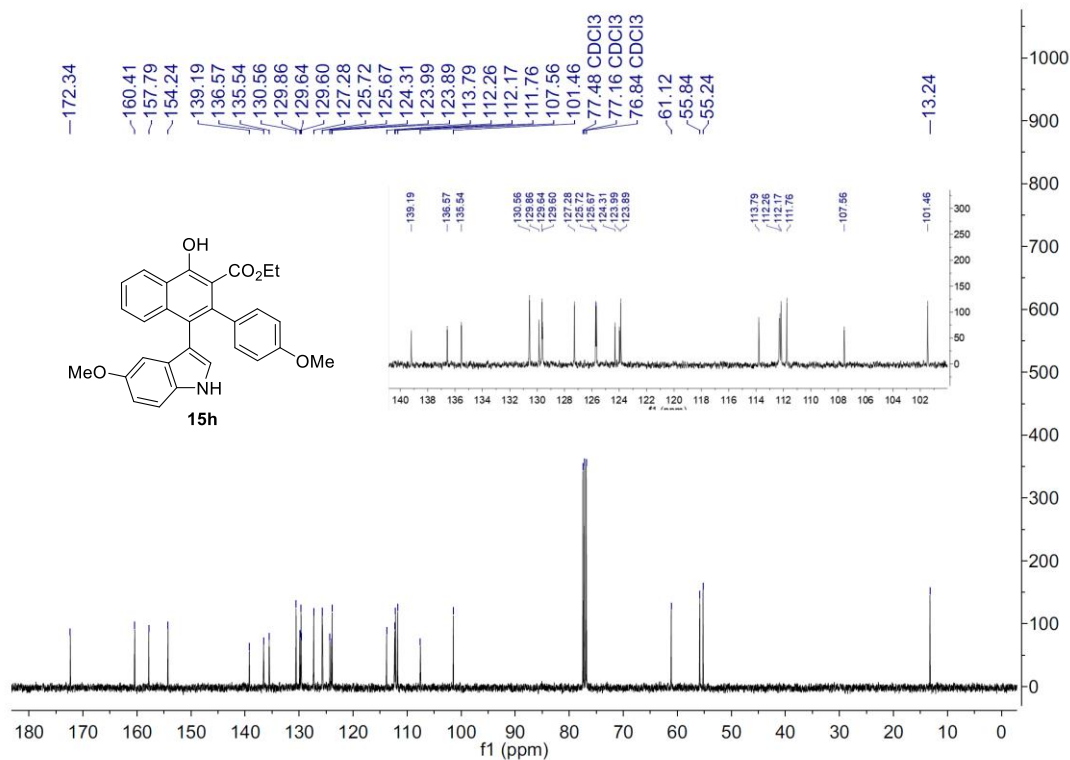

**Figure S67.** <sup>13</sup>C NMR spectra (400 MHz) of **15h** in CDCl<sub>3</sub>, related to **Scheme 1**.

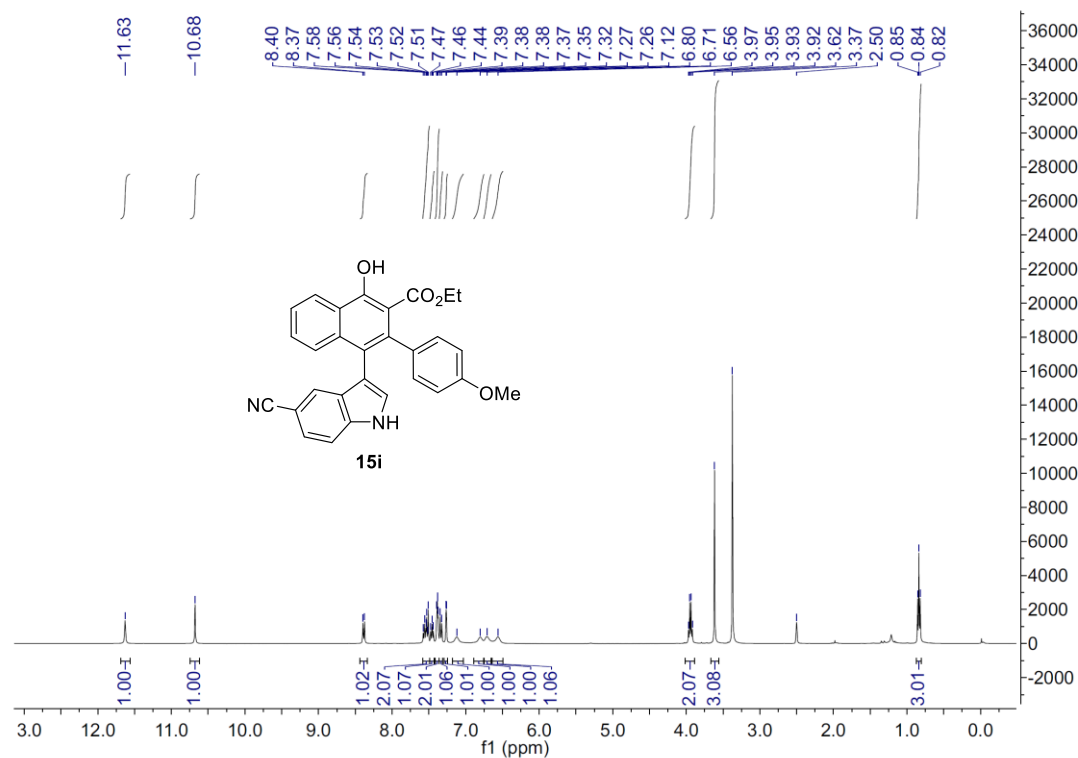

**Figure S68.** <sup>1</sup>H NMR spectra (400 MHz) of **15i** in DMSO-*d*<sub>6</sub>, related to **Scheme 1**.

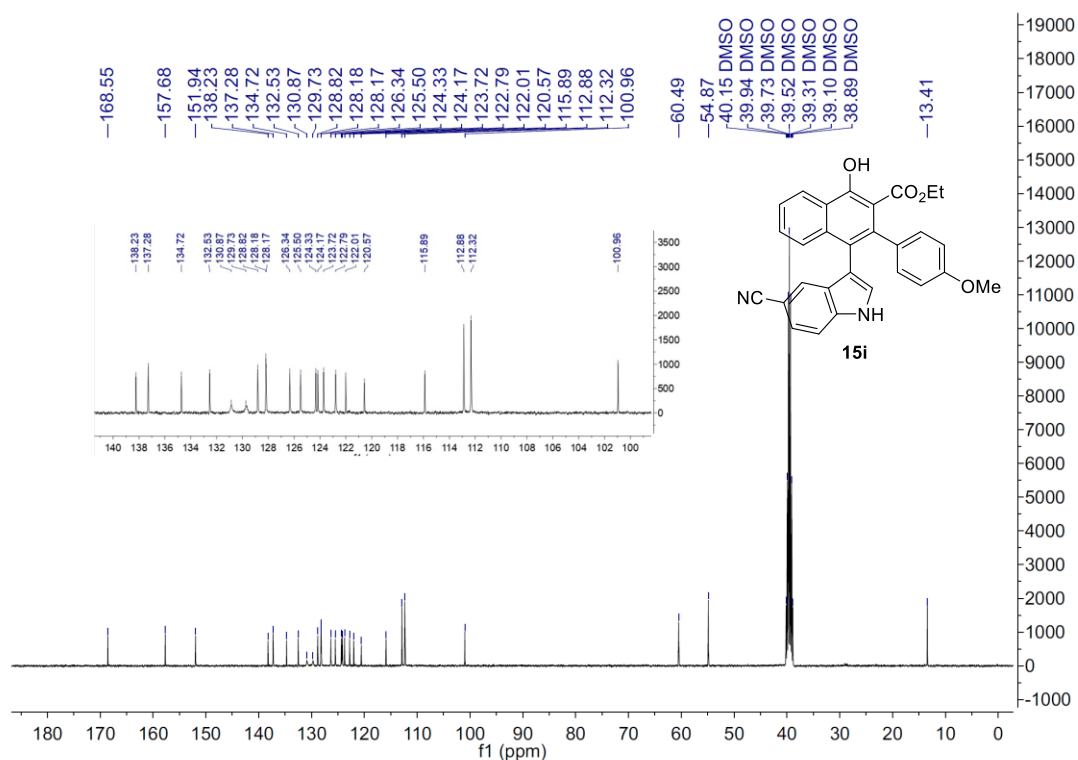

**Figure S69.**  $^{13}\text{C}$  NMR spectra (400 MHz) of **15i** in  $\text{DMSO-}d_6$ , related to **Scheme 1**.

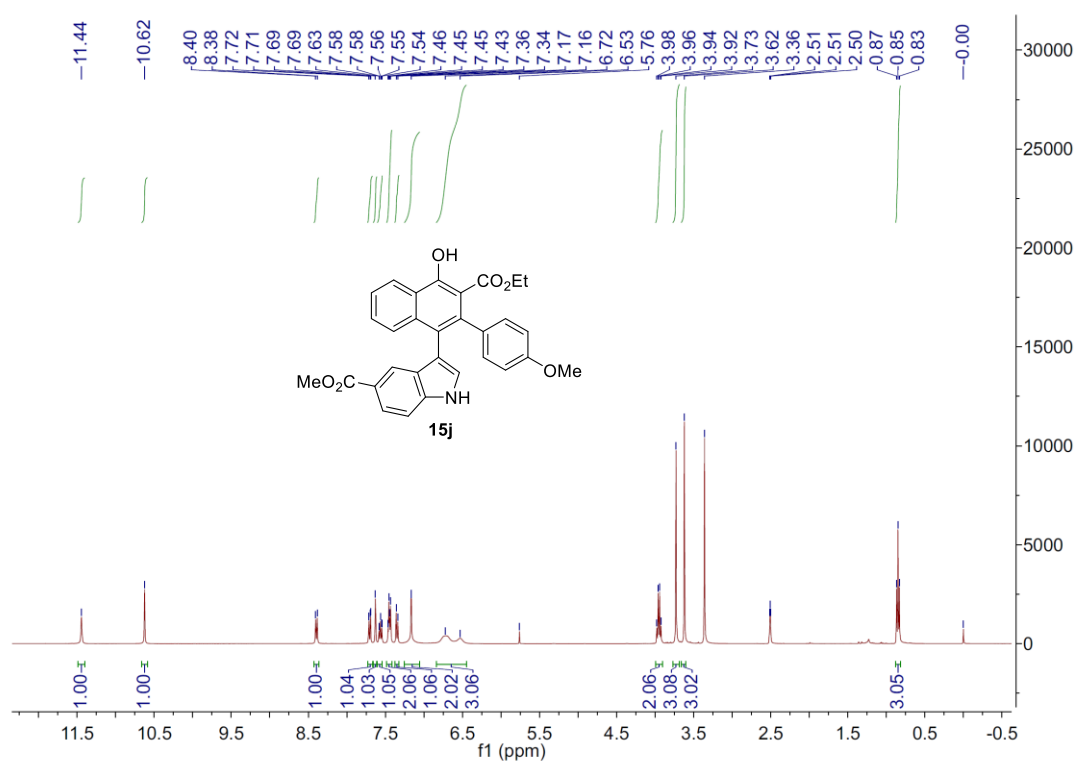

**Figure S70.**  $^1\text{H}$  NMR spectra (400 MHz) of **15j** in  $\text{DMSO-}d_6$ , related to **Scheme 1**.



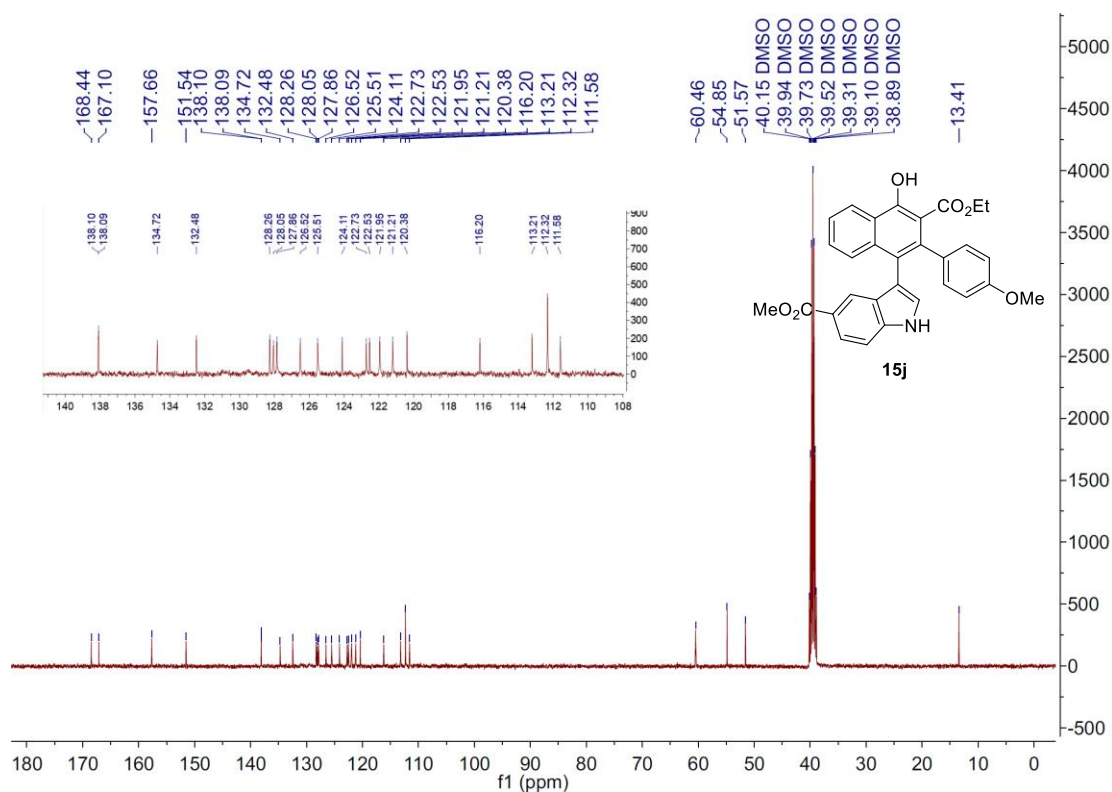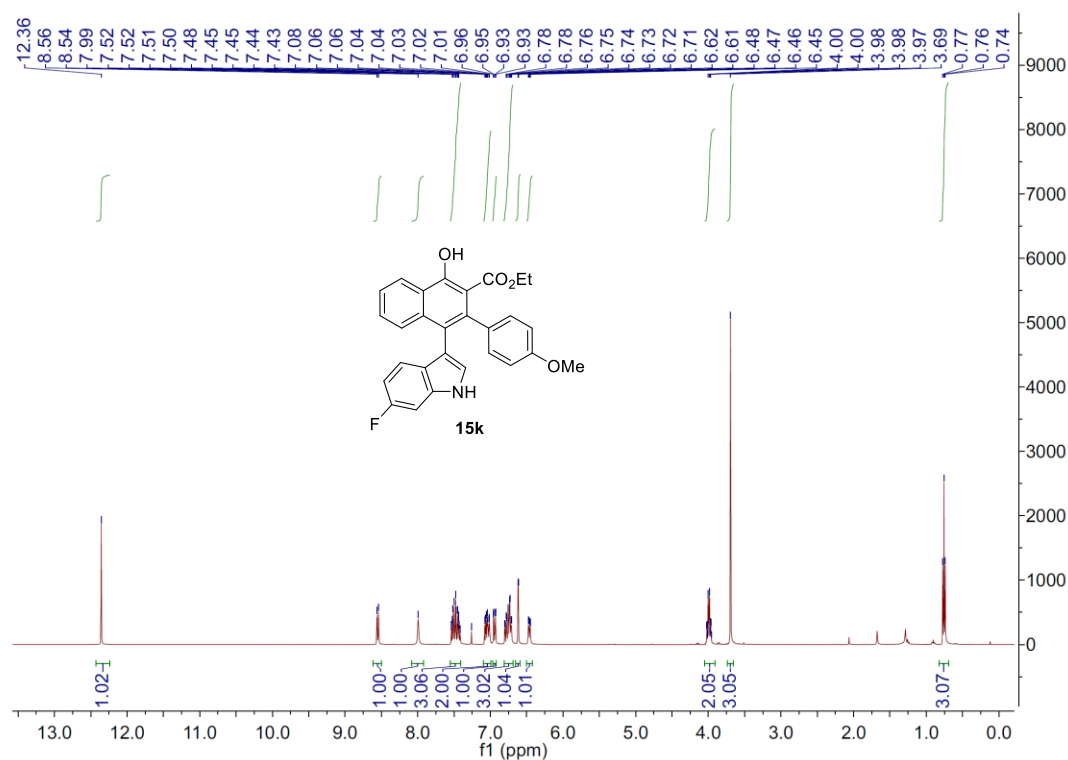

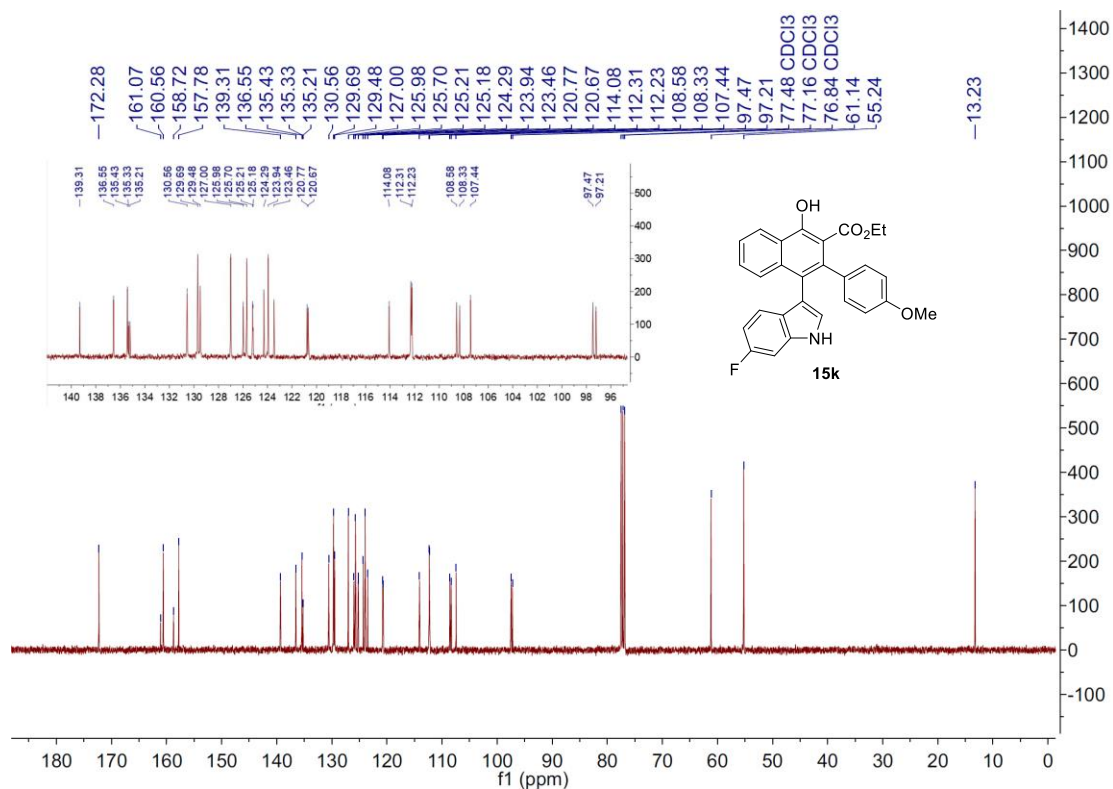

**Figure S73.** <sup>13</sup>C NMR spectra (400 MHz) of **15k** in CDCl<sub>3</sub>, related to **Scheme 1**.

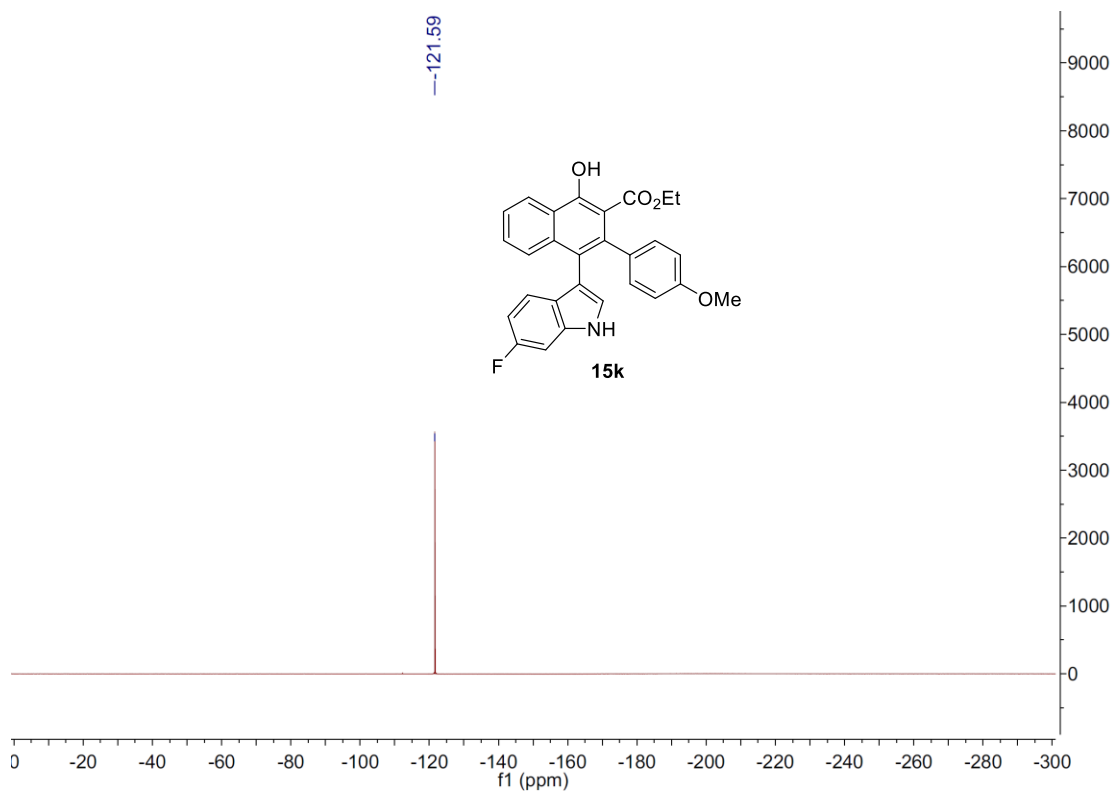

**Figure S74.** <sup>19</sup>F NMR spectra (400 MHz) of **15k** in CDCl<sub>3</sub>, related to **Scheme 1**.

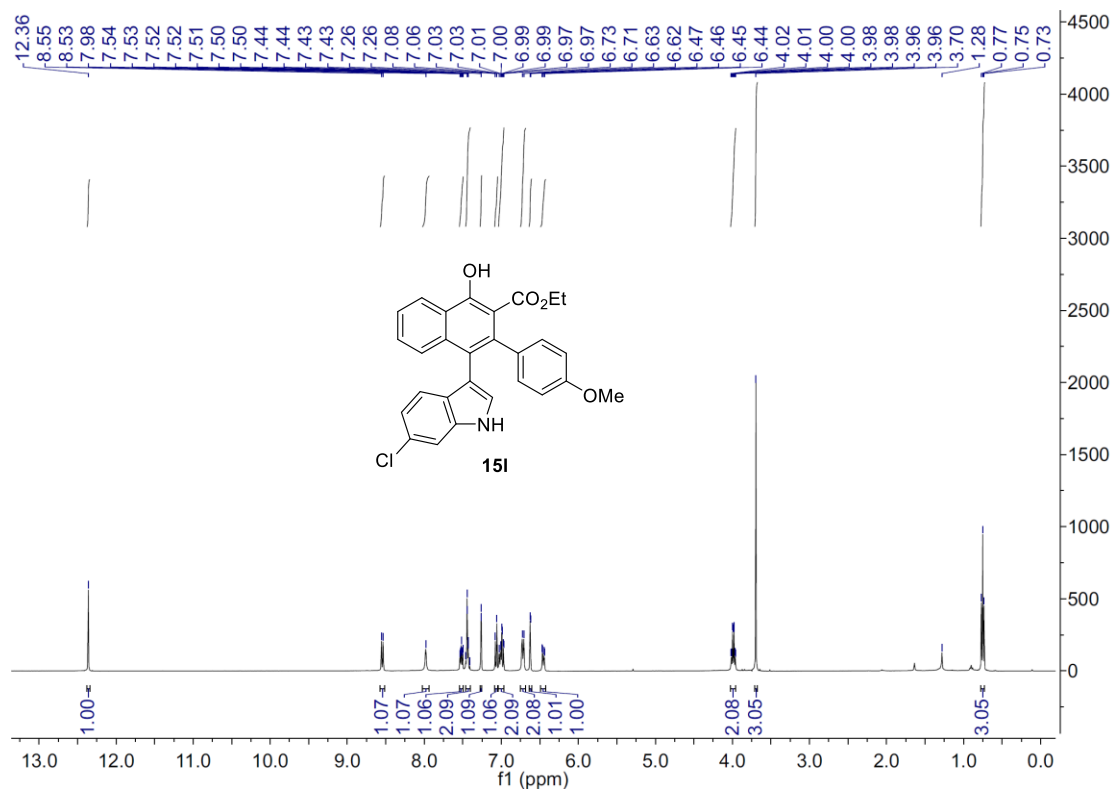

**Figure S75.**  $^1\text{H}$  NMR spectra (400 MHz) of **15I** in  $\text{CDCl}_3$ , related to **Scheme 1**.

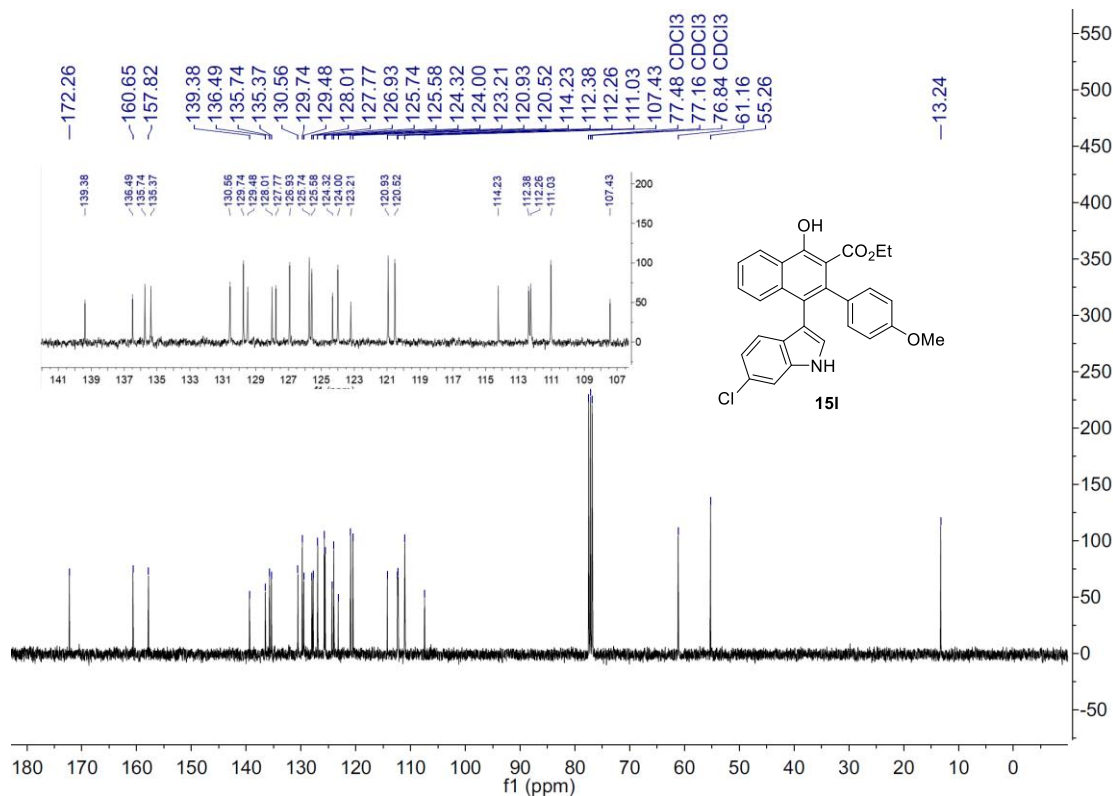

**Figure S76.**  $^{13}\text{C}$  NMR spectra (400 MHz) of **15I** in  $\text{CDCl}_3$ , related to **Scheme 1**.

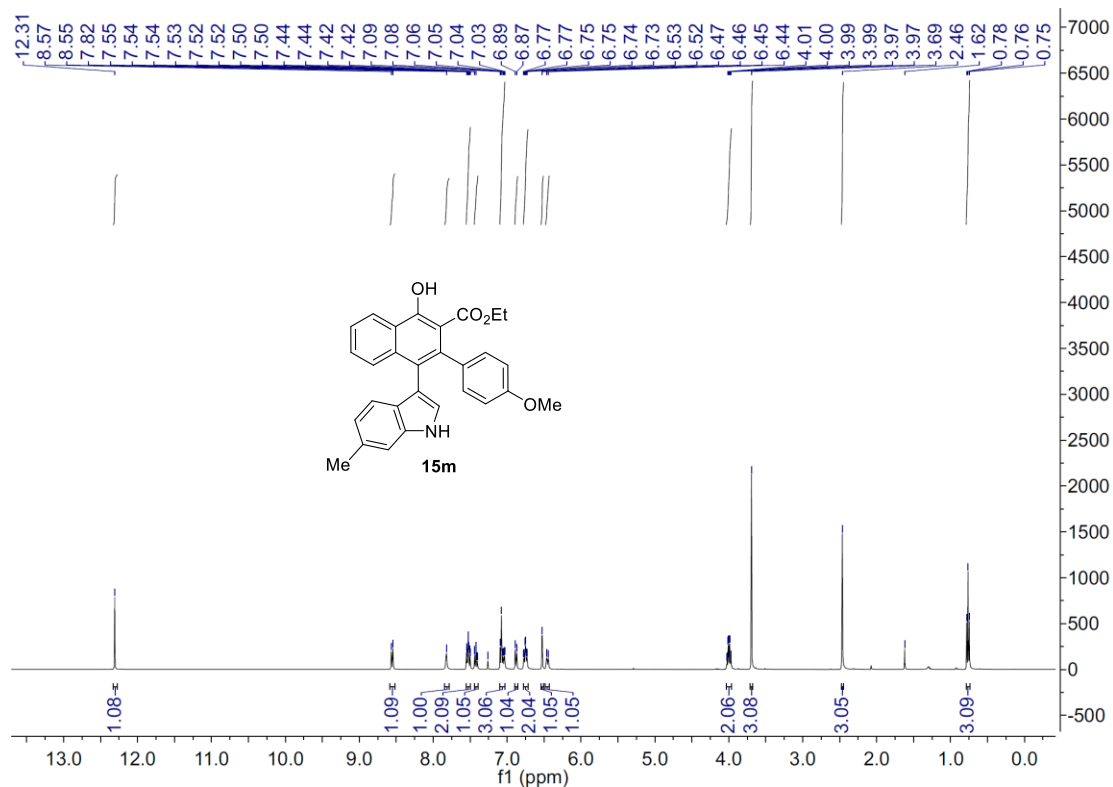

Figure S77. <sup>1</sup>H NMR spectra (400 MHz) of **15m** in CDCl<sub>3</sub>, related to Scheme 1.

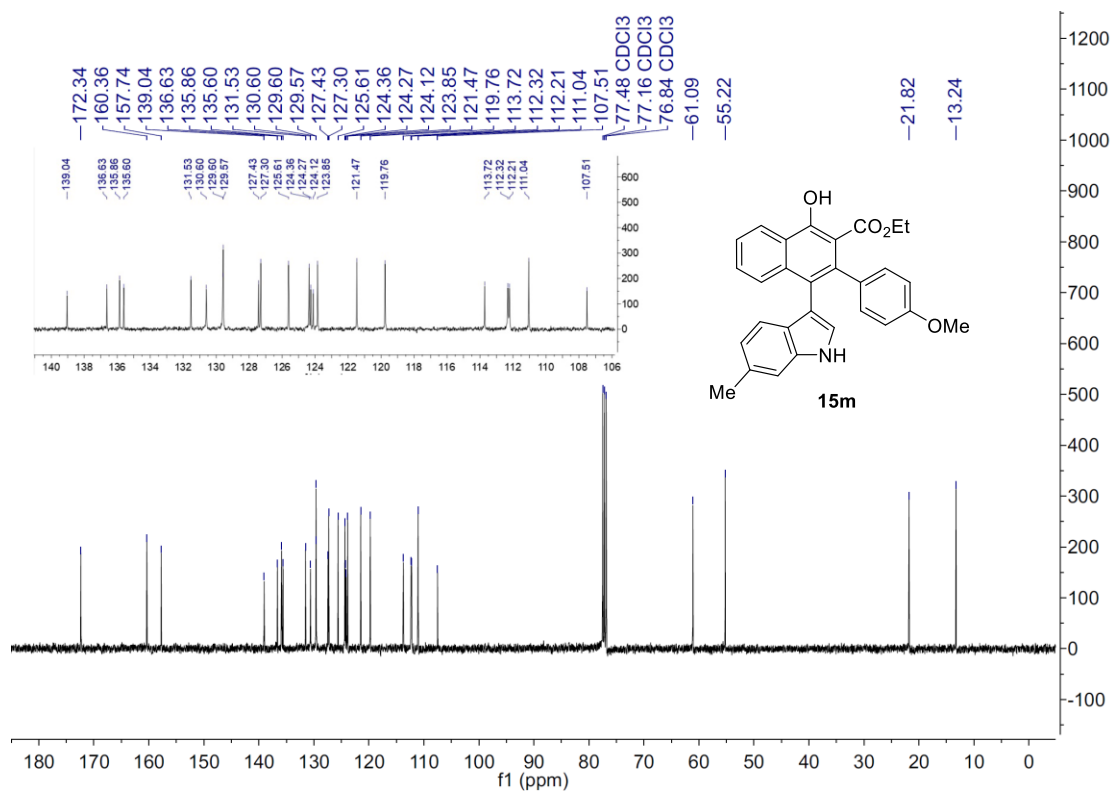

Figure S78. <sup>13</sup>C NMR spectra (400 MHz) of **15m** in CDCl<sub>3</sub>, related to Scheme 1.

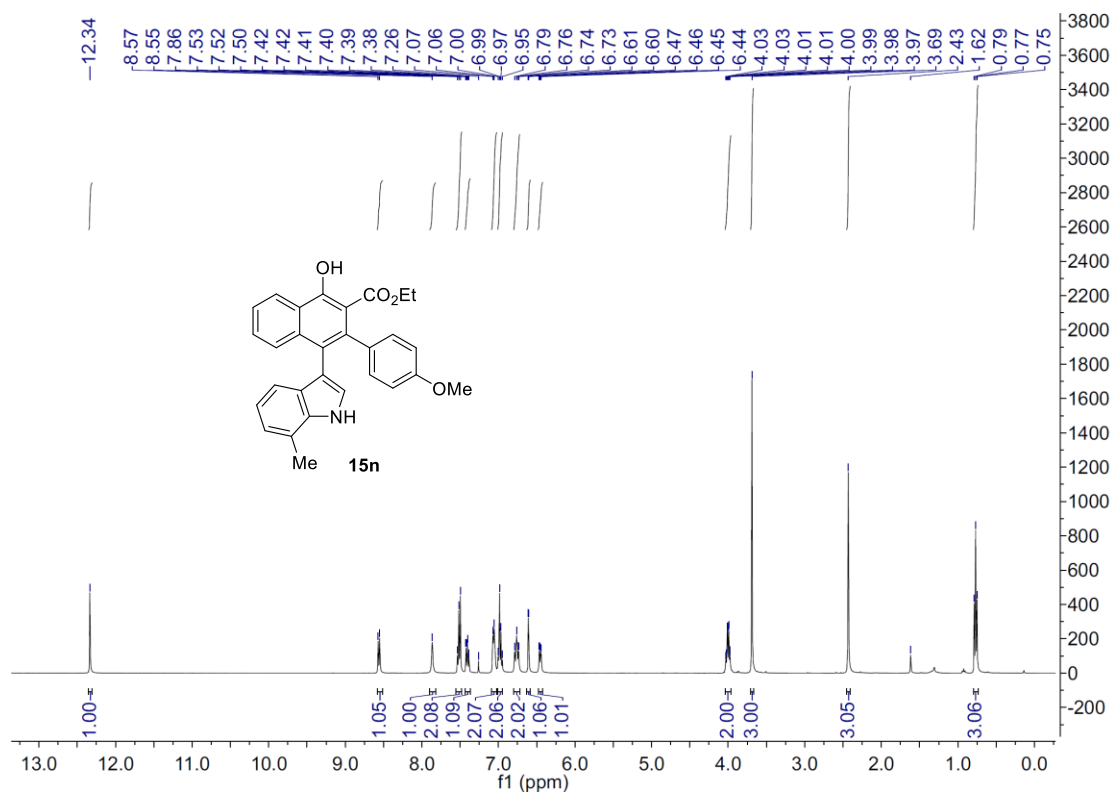

**Figure S79.** <sup>1</sup>H NMR spectra (400 MHz) of **15n** in CDCl<sub>3</sub>, related to **Scheme 1**.

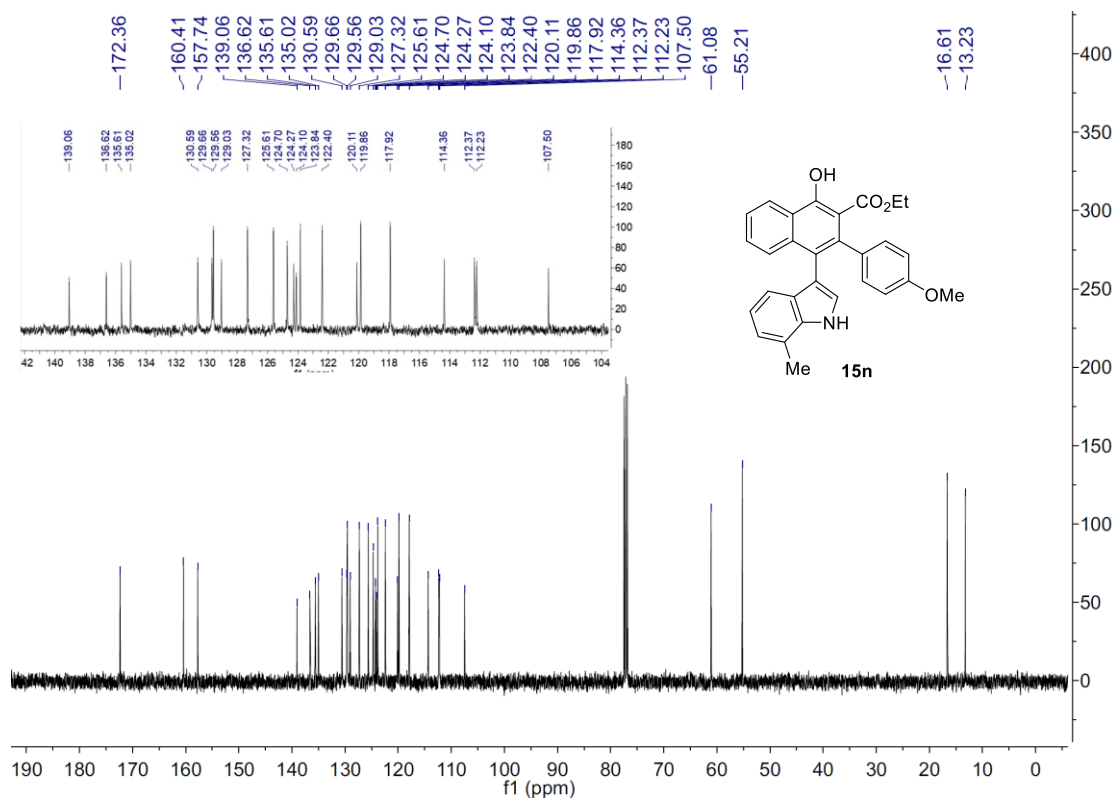

**Figure S80.** <sup>13</sup>C NMR spectra (400 MHz) of **15n** in CDCl<sub>3</sub>, related to **Scheme 1**.

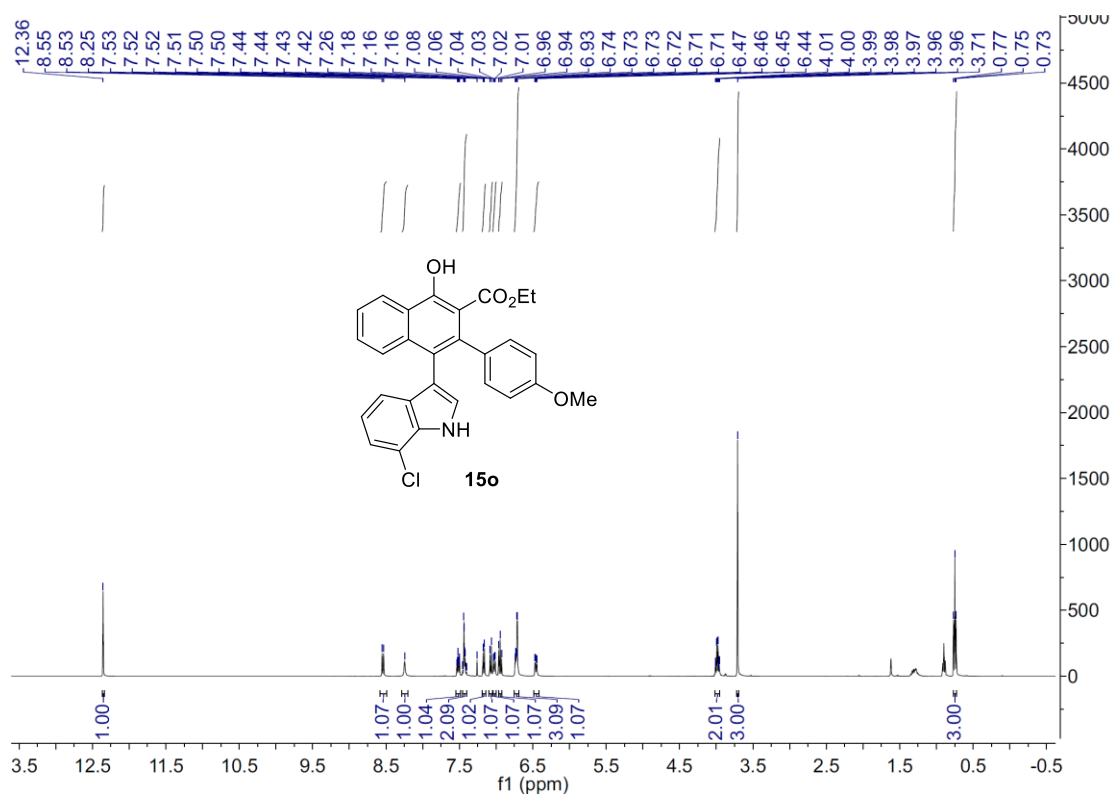

**Figure S81.** <sup>1</sup>H NMR spectra (400 MHz) of **15o** in CDCl<sub>3</sub>, related to **Scheme 1**.

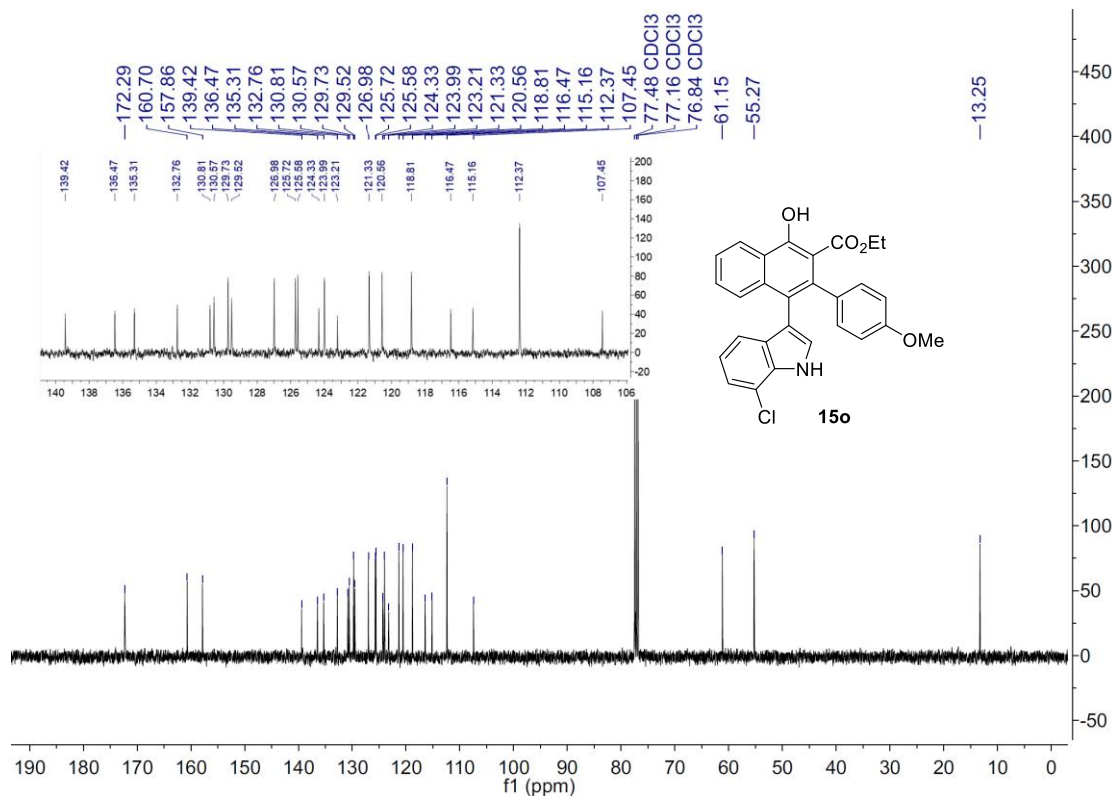

**Figure S82.** <sup>13</sup>C NMR spectra (400 MHz) of **15o** in CDCl<sub>3</sub>, related to **Scheme 1**.

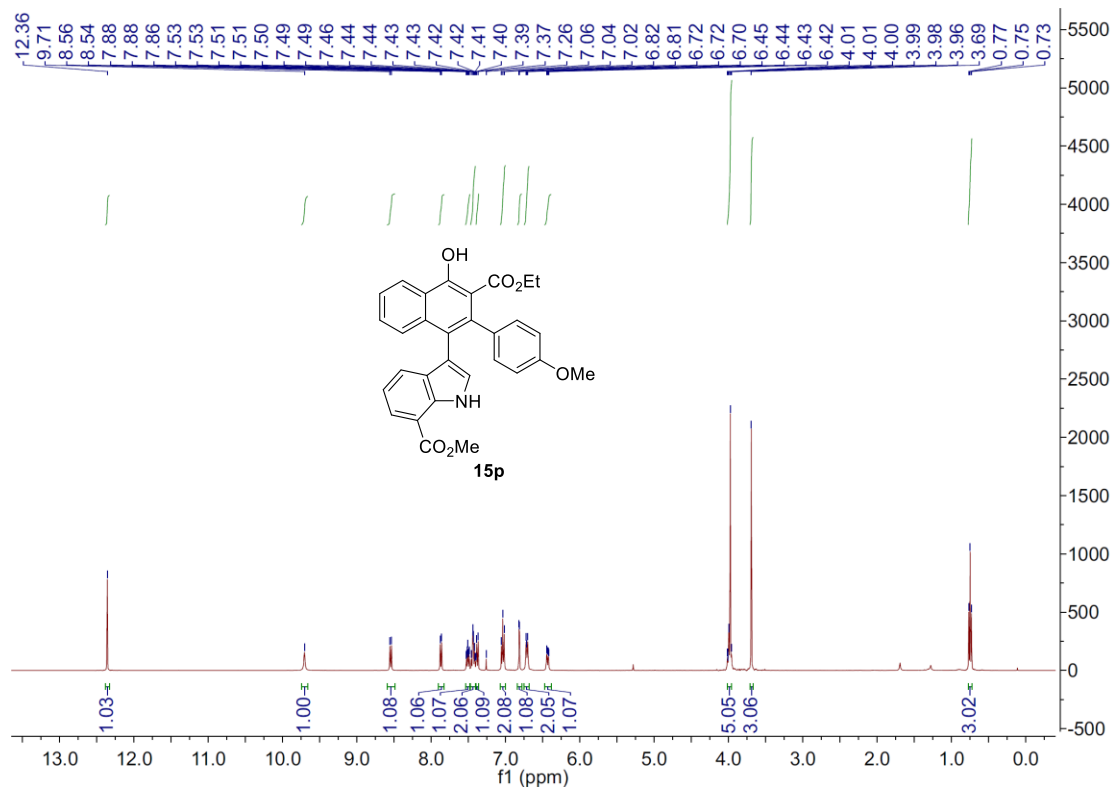

**Figure S83.**  $^1\text{H}$  NMR spectra (400 MHz) of **15p** in  $\text{CDCl}_3$ , related to **Scheme 1**.

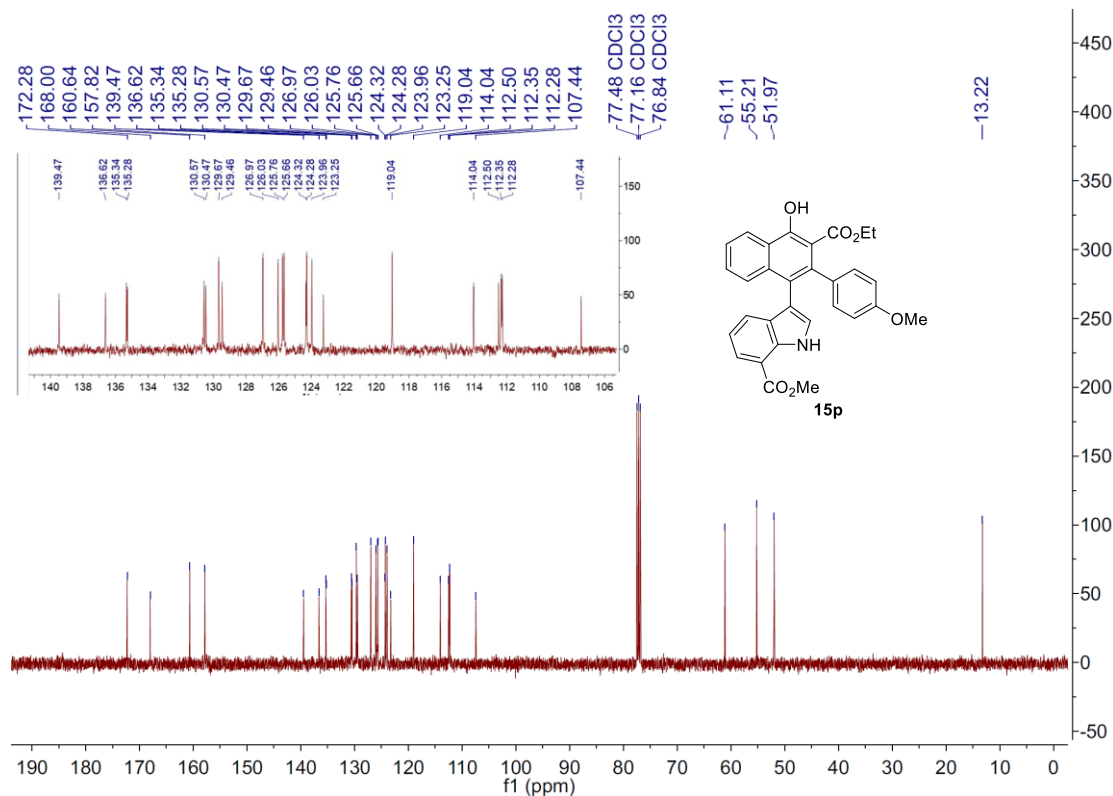

**Figure S84.**  $^{13}\text{C}$  NMR spectra (400 MHz) of **15p** in  $\text{CDCl}_3$ , related to **Scheme 1**.



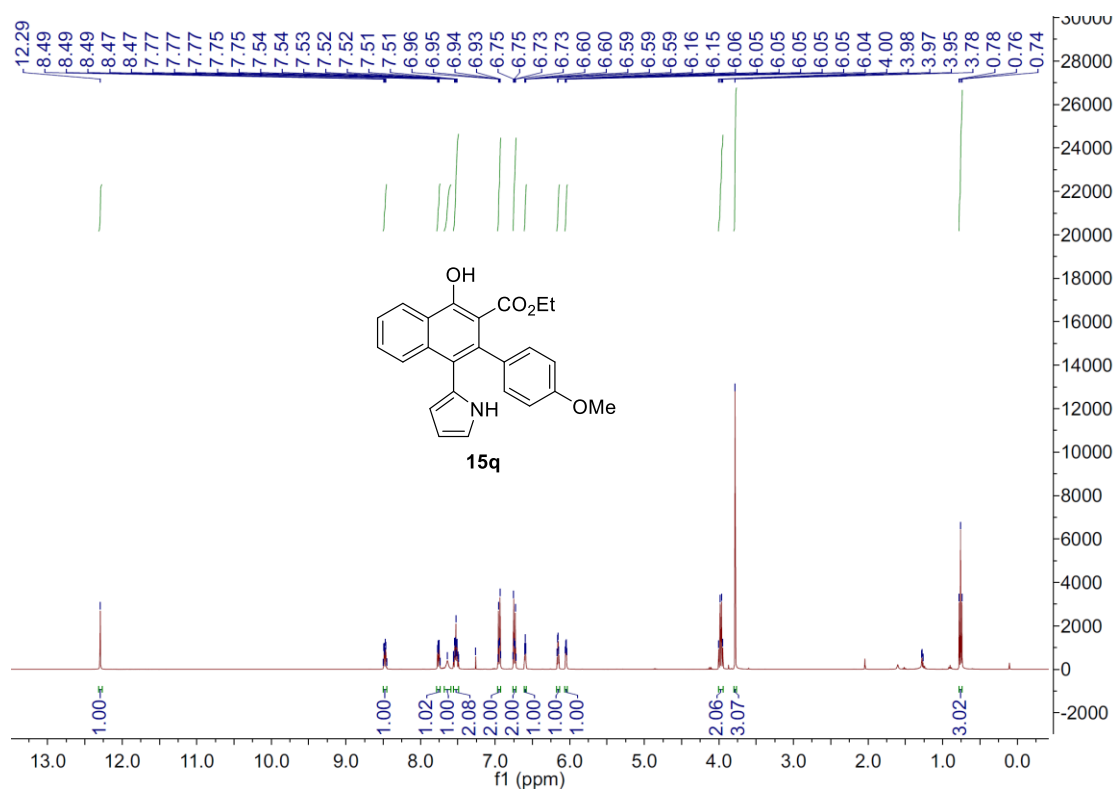

**Figure S85.**  $^1\text{H}$  NMR spectra (400 MHz) of **15q** in  $\text{CDCl}_3$ , related to **Scheme 1**.

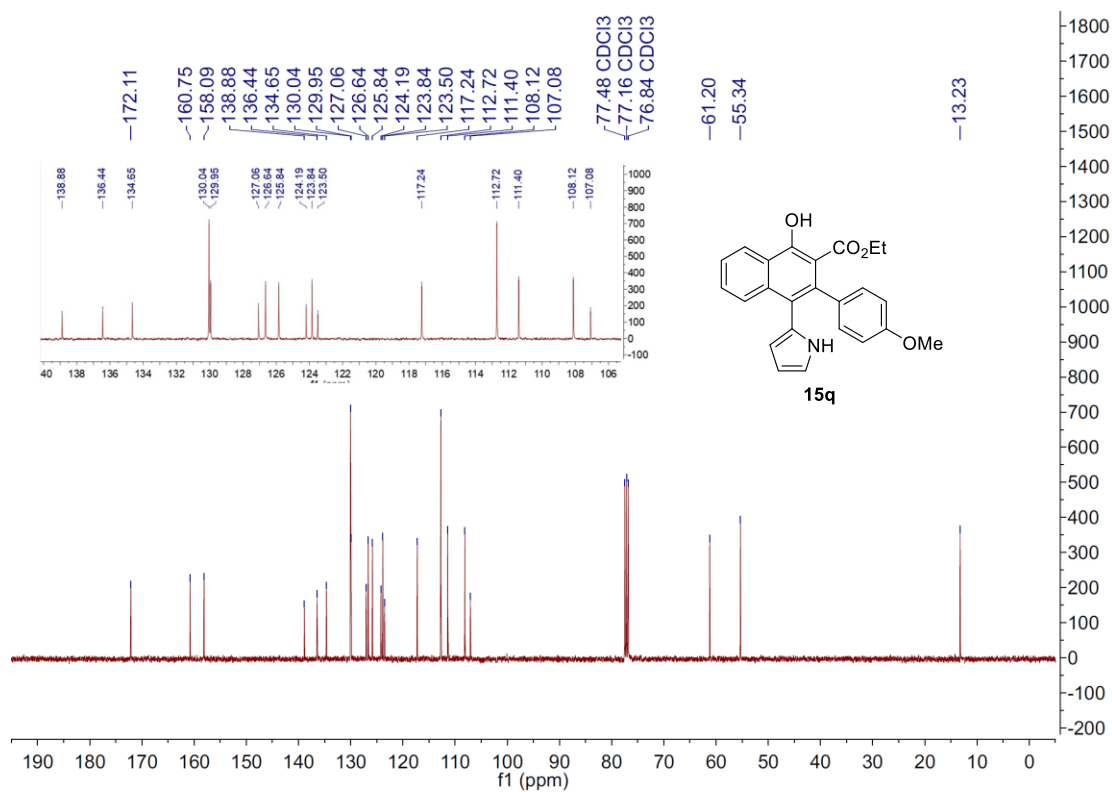

**Figure S86.**  $^{13}\text{C}$  NMR spectra (400 MHz) of **15q** in  $\text{CDCl}_3$ , related to **Scheme 1**.



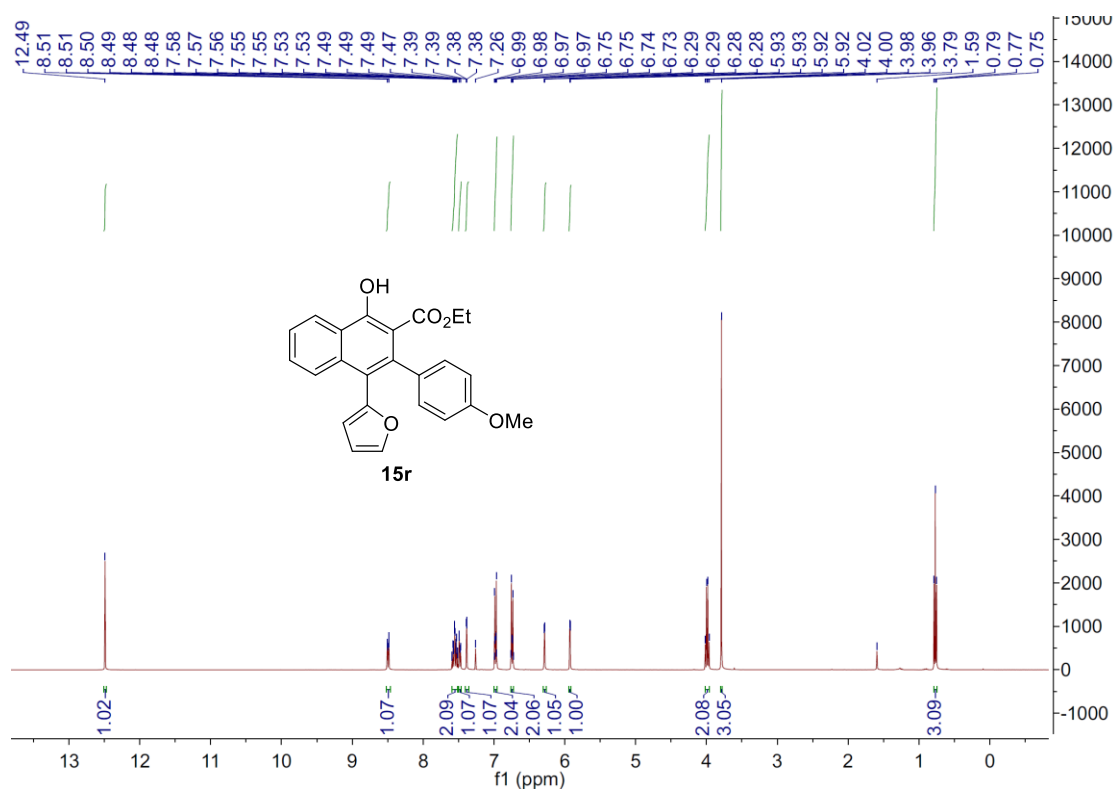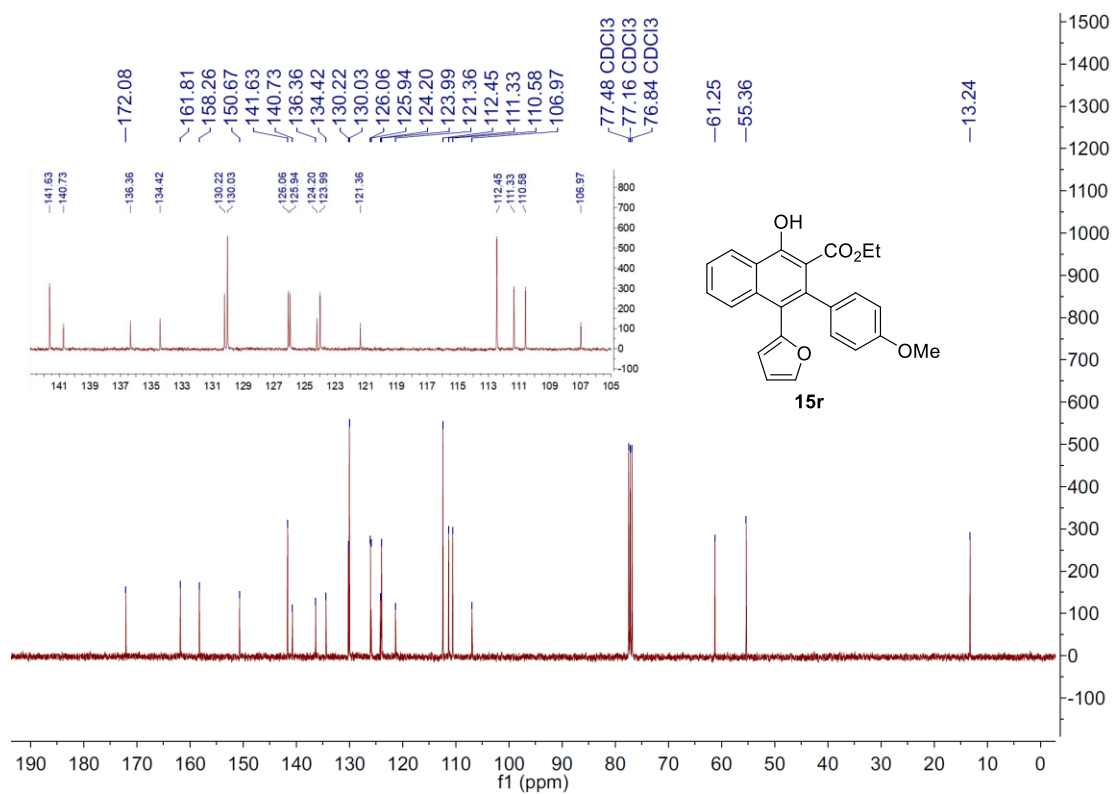

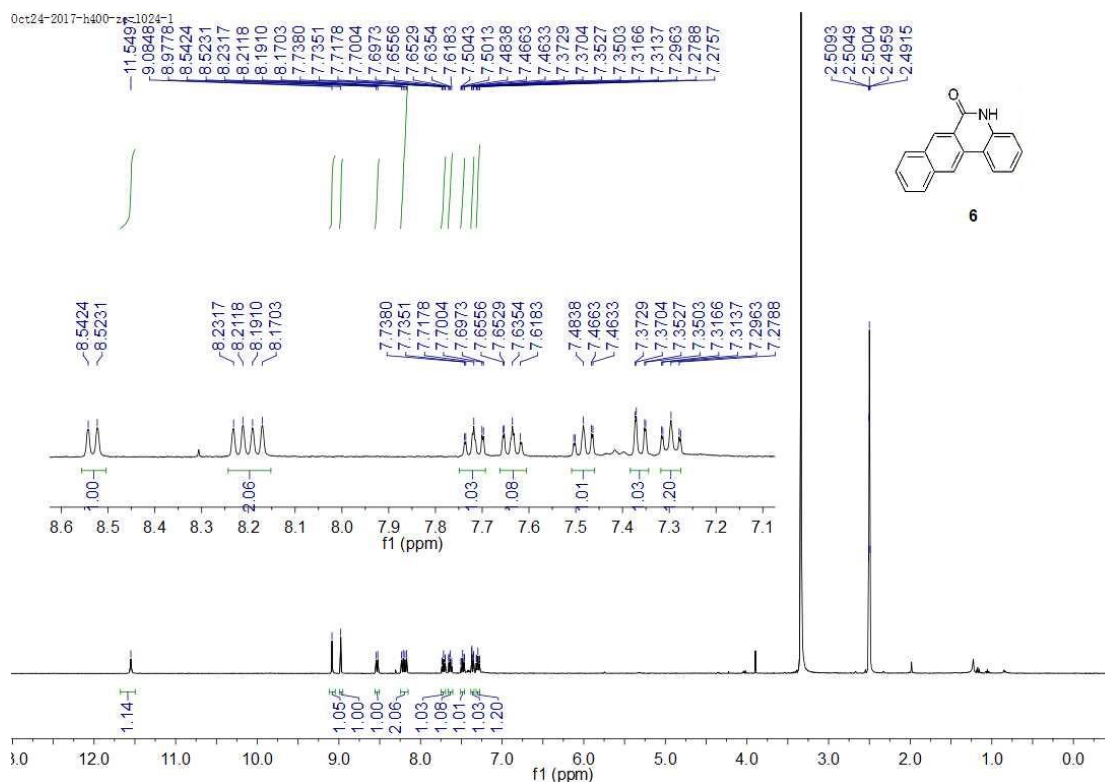

**Figure S89.**  $^1\text{H}$  NMR spectra (400 MHz) of **6** in  $\text{DMSO-}d_6$ , related to **Figure 2A**.

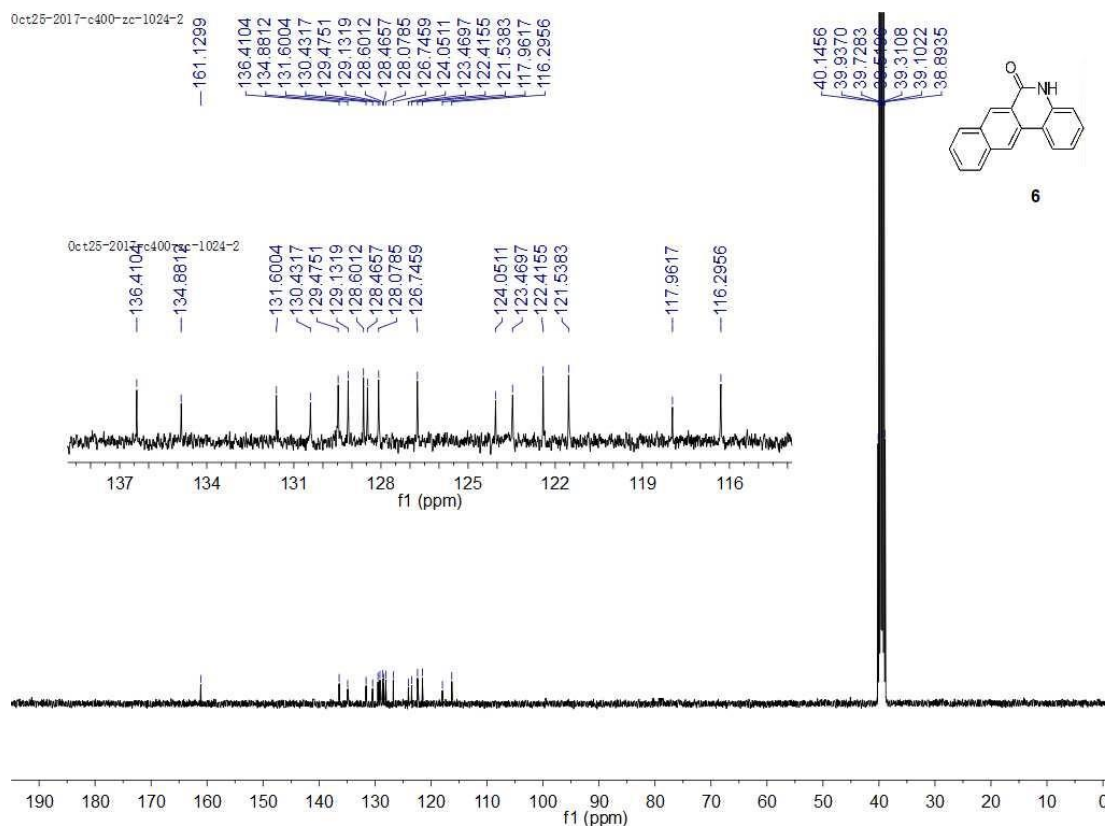

**Figure S90.**  $^{13}\text{C}$  NMR spectra (400 MHz) of **6** in  $\text{DMSO-}d_6$ , related to **Figure 2A**.

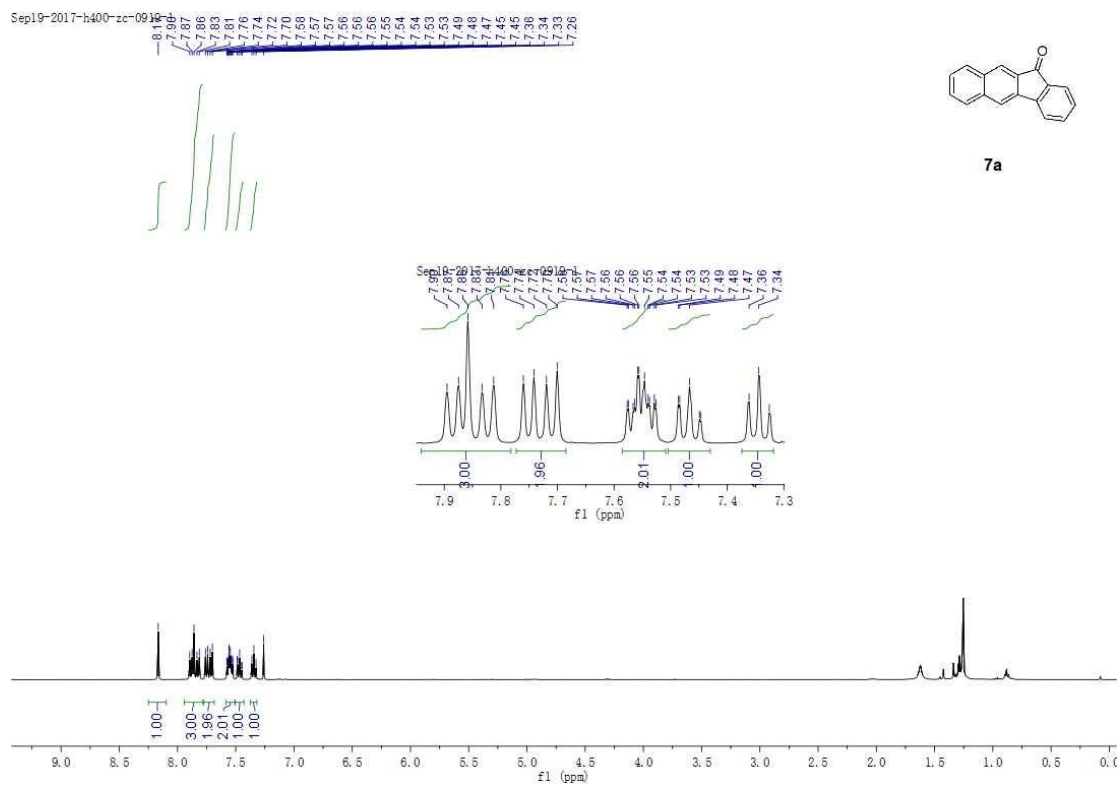

**Figure S91.**  $^1\text{H}$  NMR spectra (400 MHz) of **7a** in  $\text{CDCl}_3$ , related to **Figure 2B**.

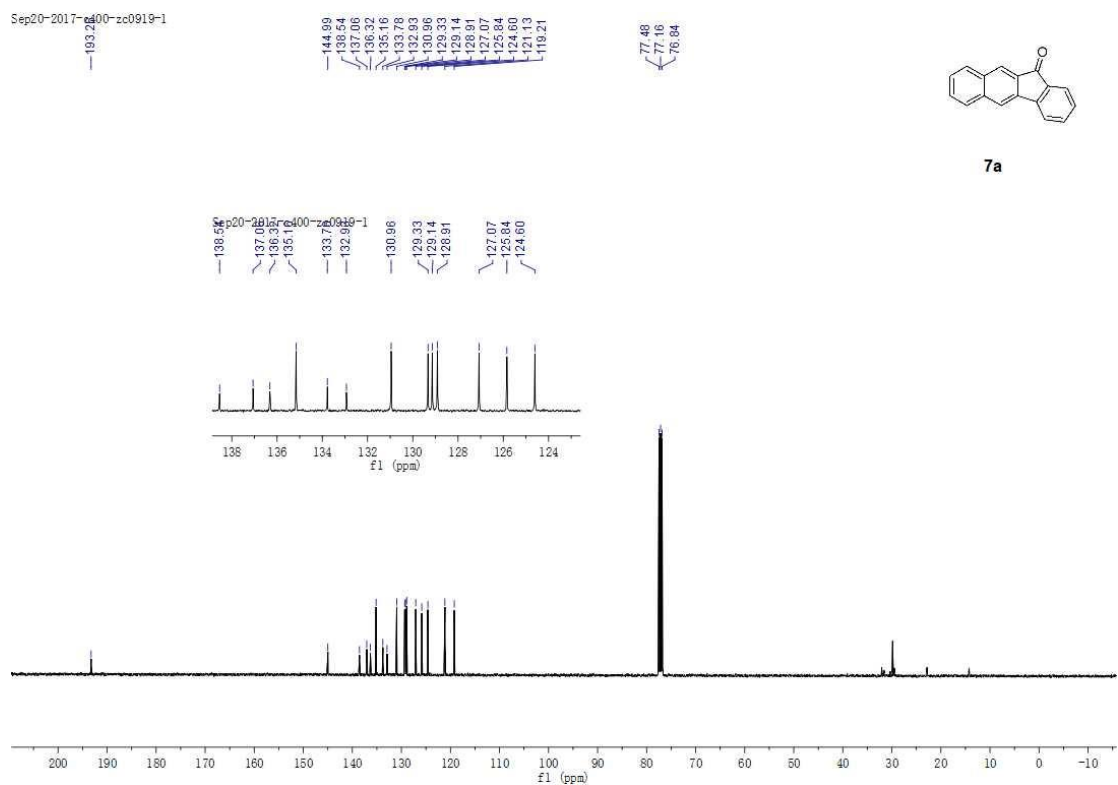

**Figure S92.**  $^{13}\text{C}$  NMR spectra (400 MHz) of **7a** in  $\text{CDCl}_3$ , related to **Figure 2B**.

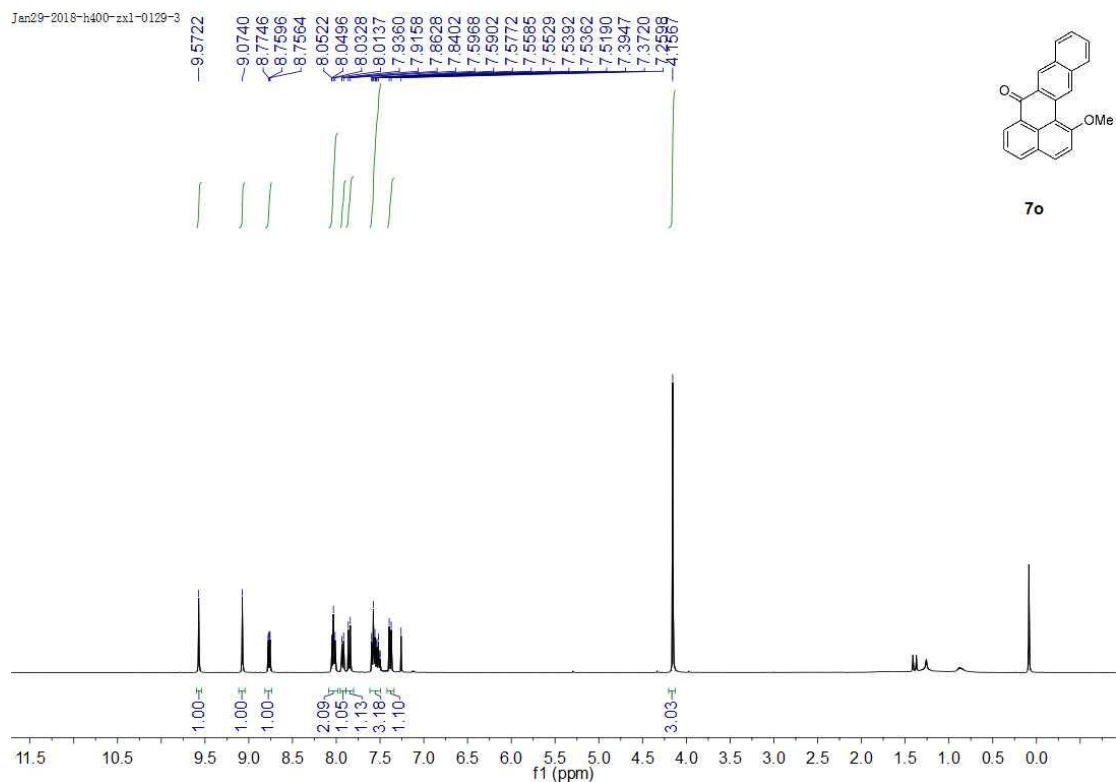

**Figure S93.**  $^1\text{H}$  NMR spectra (400 MHz) of **7o** in  $\text{CDCl}_3$ , related to **Figure 2C**.

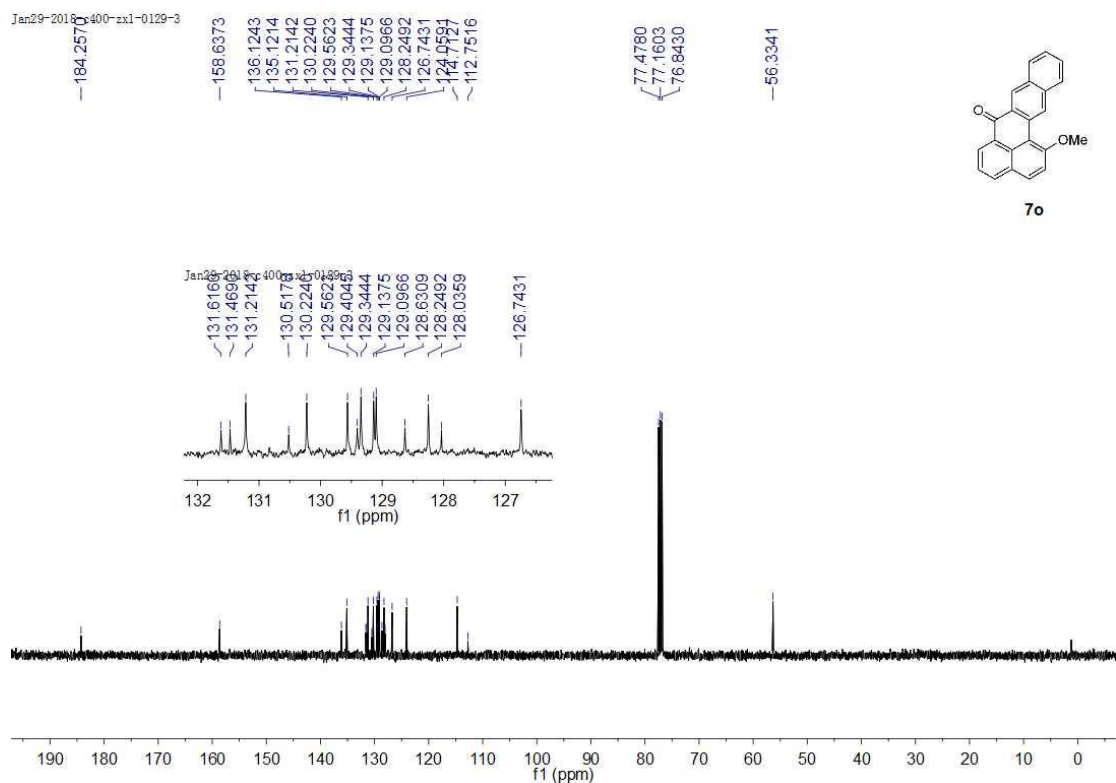

**Figure S94.**  $^{13}\text{C}$  NMR spectra (400 MHz) of **7o** in  $\text{CDCl}_3$ , related to **Figure 2C**.

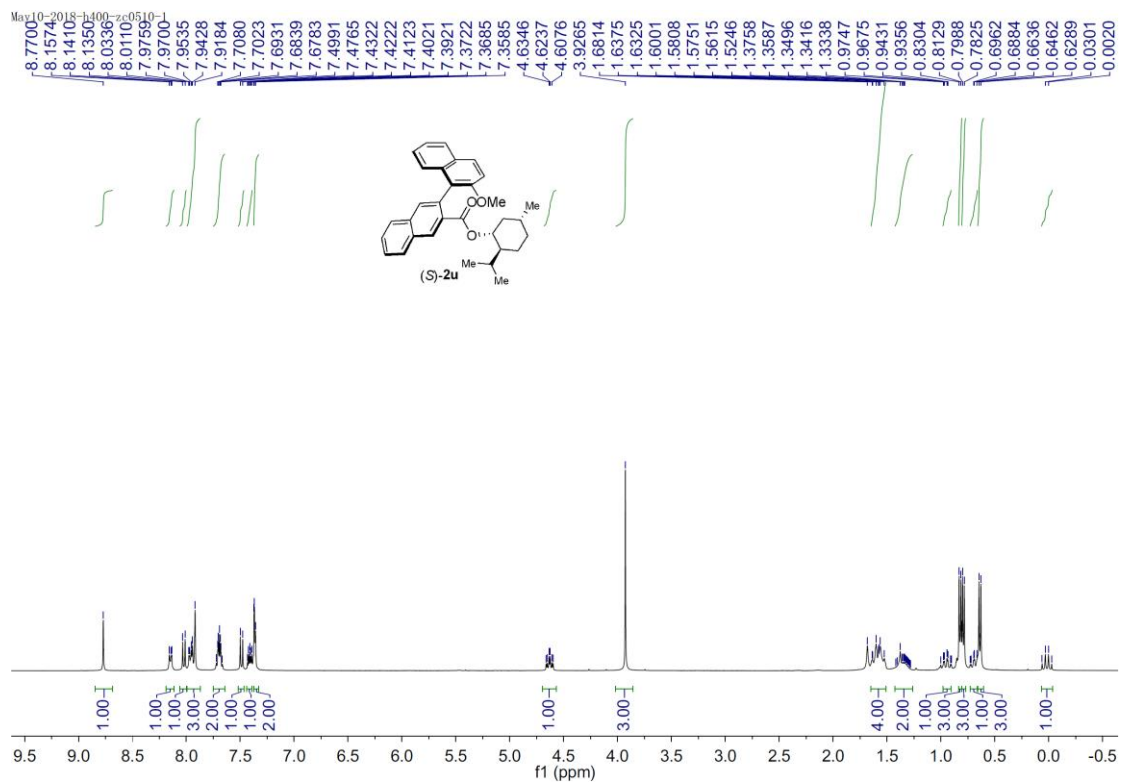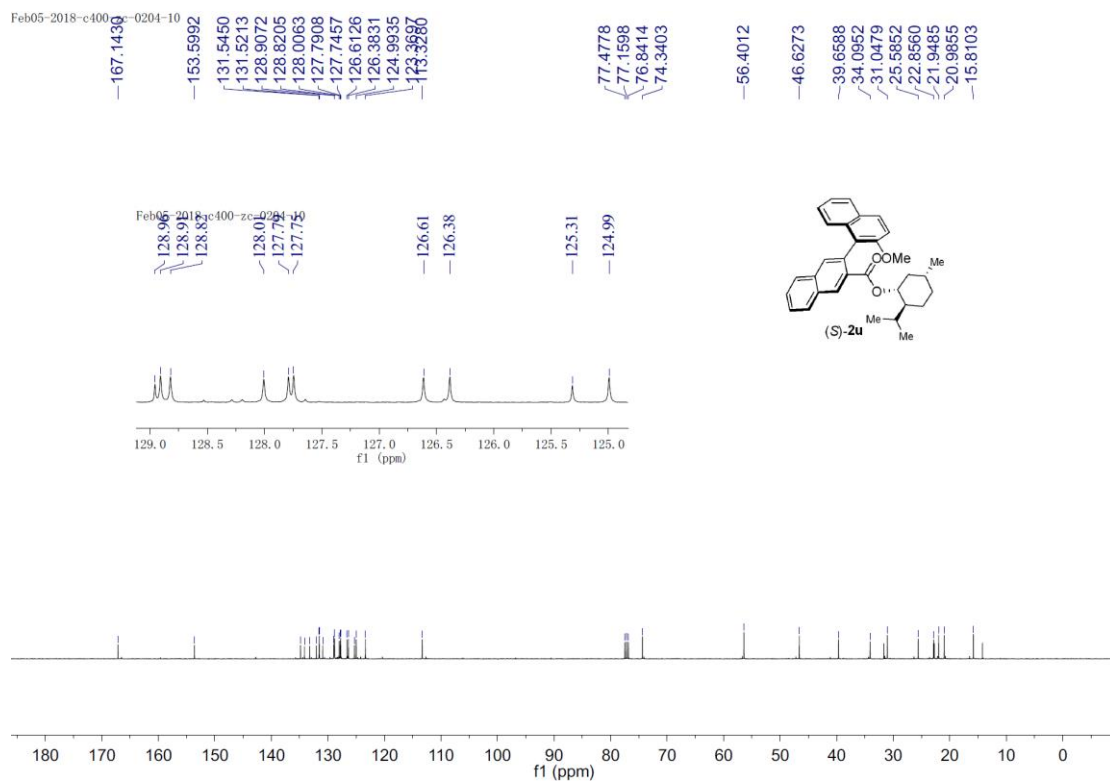

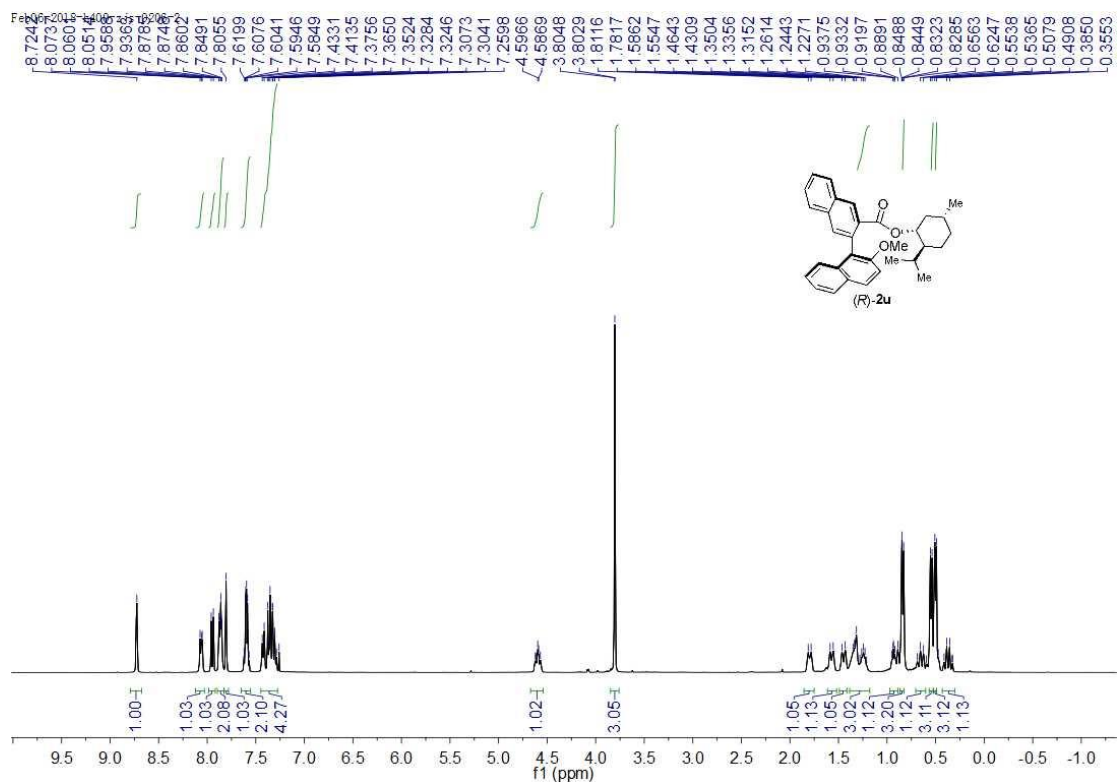

**Figure S97.** <sup>1</sup>H NMR spectra (400 MHz) of (R)-2u in CDCl<sub>3</sub>, related to **Figure 2D**.

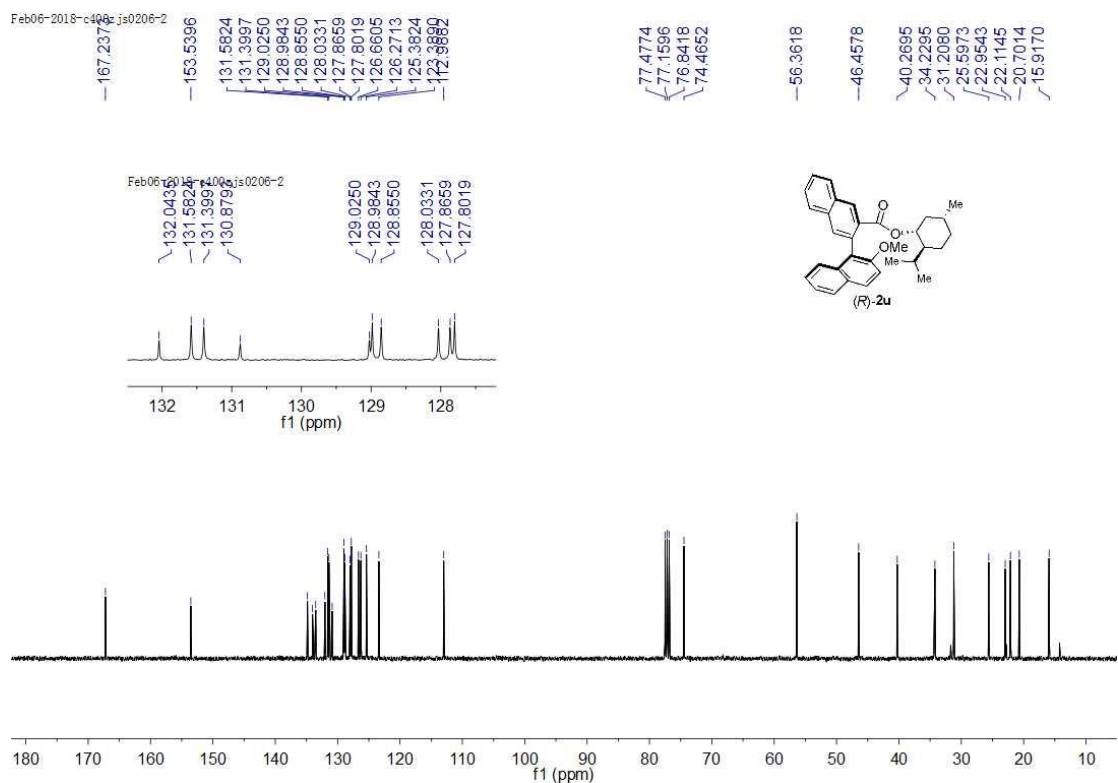

**Figure S98.** <sup>13</sup>C NMR spectra (400 MHz) of (R)-2u in CDCl<sub>3</sub>, related to **Figure 2D**.



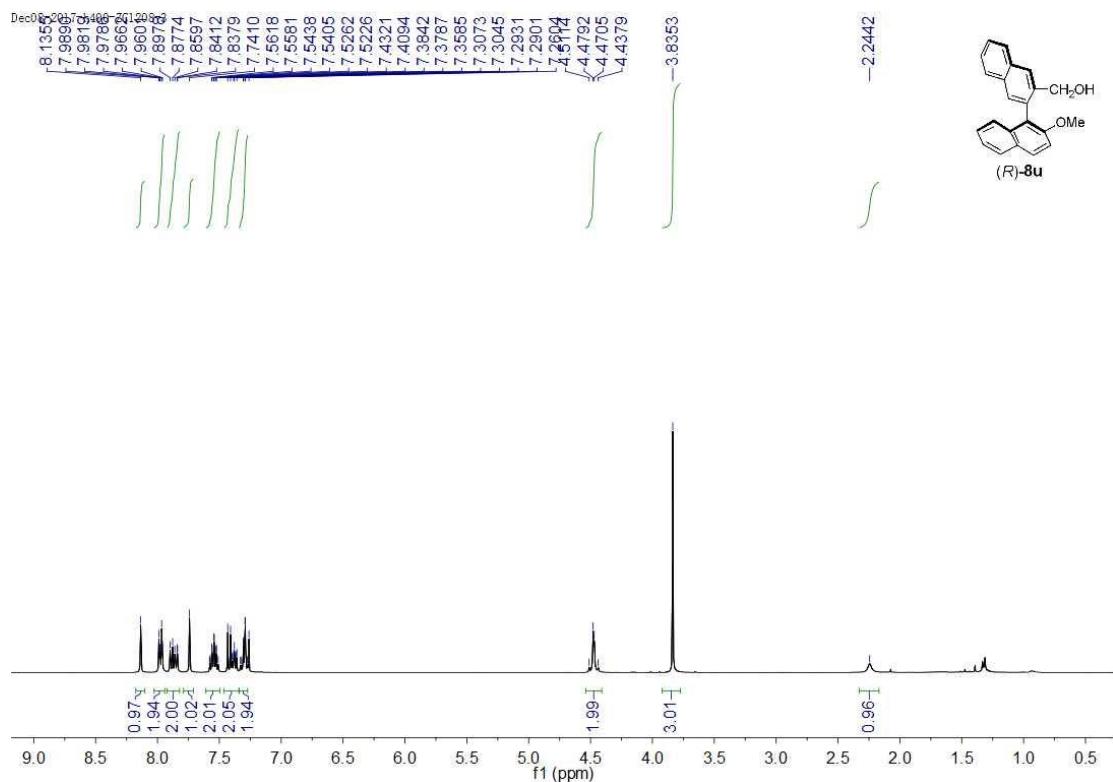

**Figure S99.** <sup>1</sup>H NMR spectra (400 MHz) of (R)-8u in CDCl<sub>3</sub>, related to **Figure 2D**.

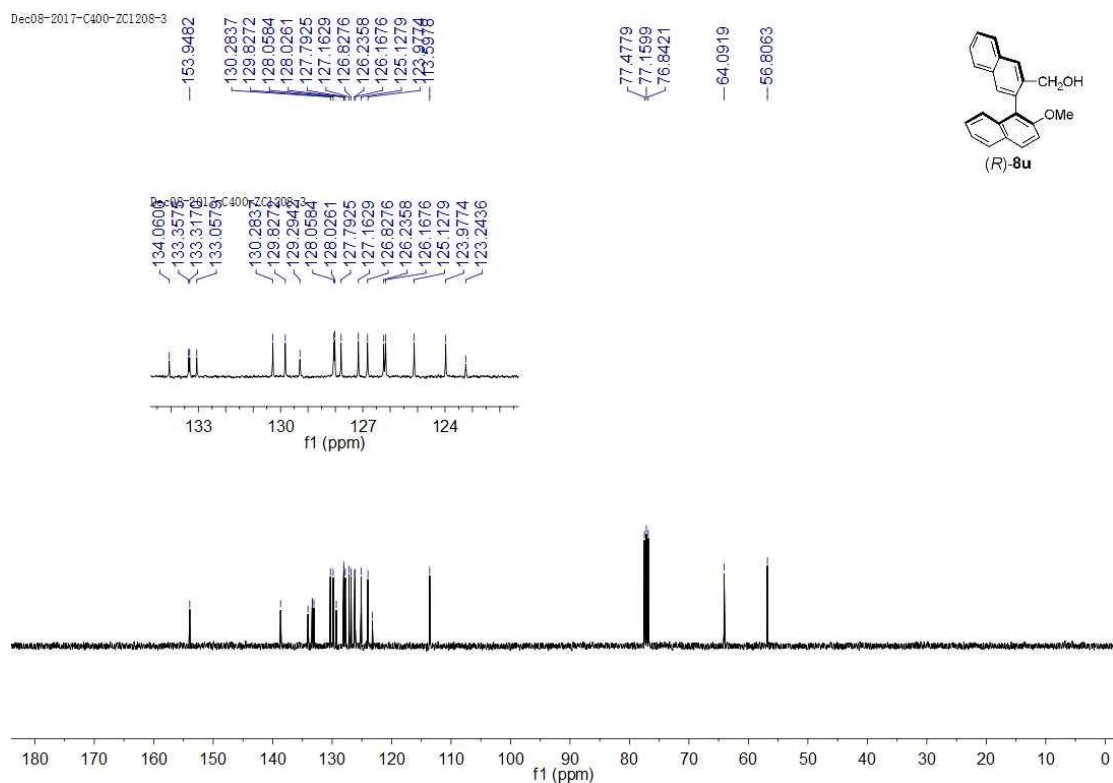

**Figure S100.** <sup>13</sup>C NMR spectra (400 MHz) of (R)-8u in CDCl<sub>3</sub>, related to **Figure 2D**.

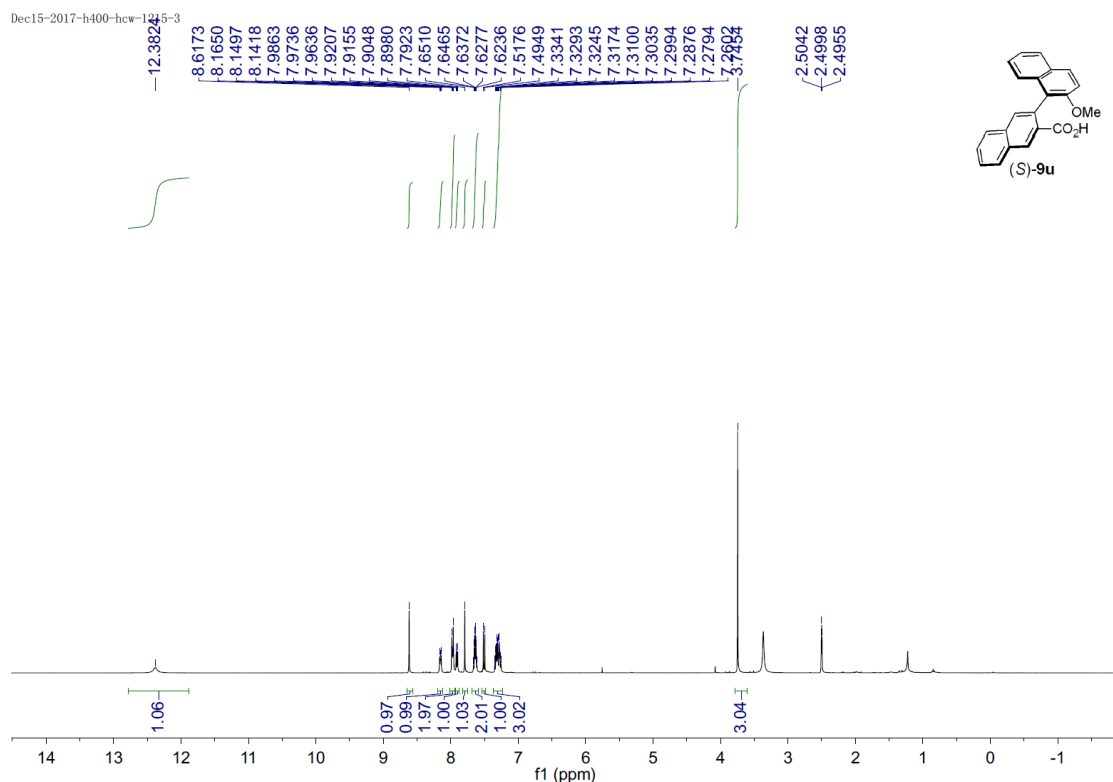

**Figure S101.** <sup>1</sup>H NMR spectra (400 MHz) of (S)-**9u** in DMSO-*d*<sub>6</sub>, related to **Figure 2D**.

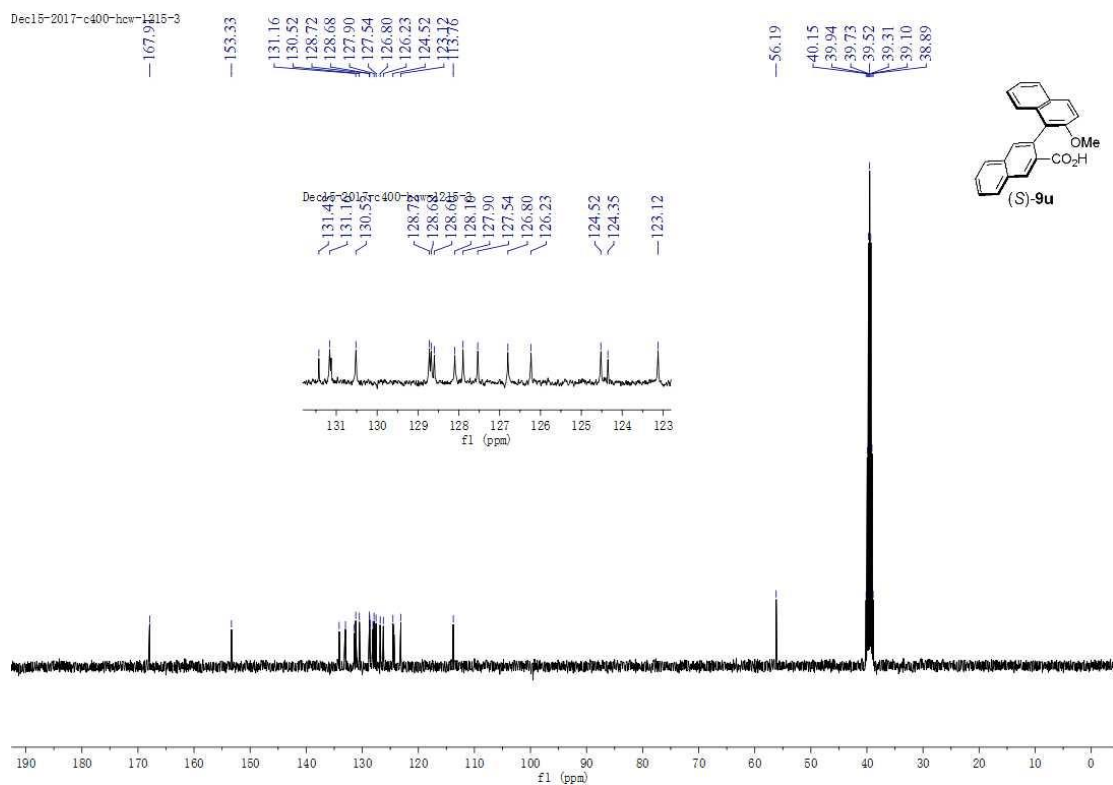

**Figure S102.** <sup>13</sup>C NMR spectra (400 MHz) of (S)-**9u** in DMSO-*d*<sub>6</sub>, related to **Figure 2D**.



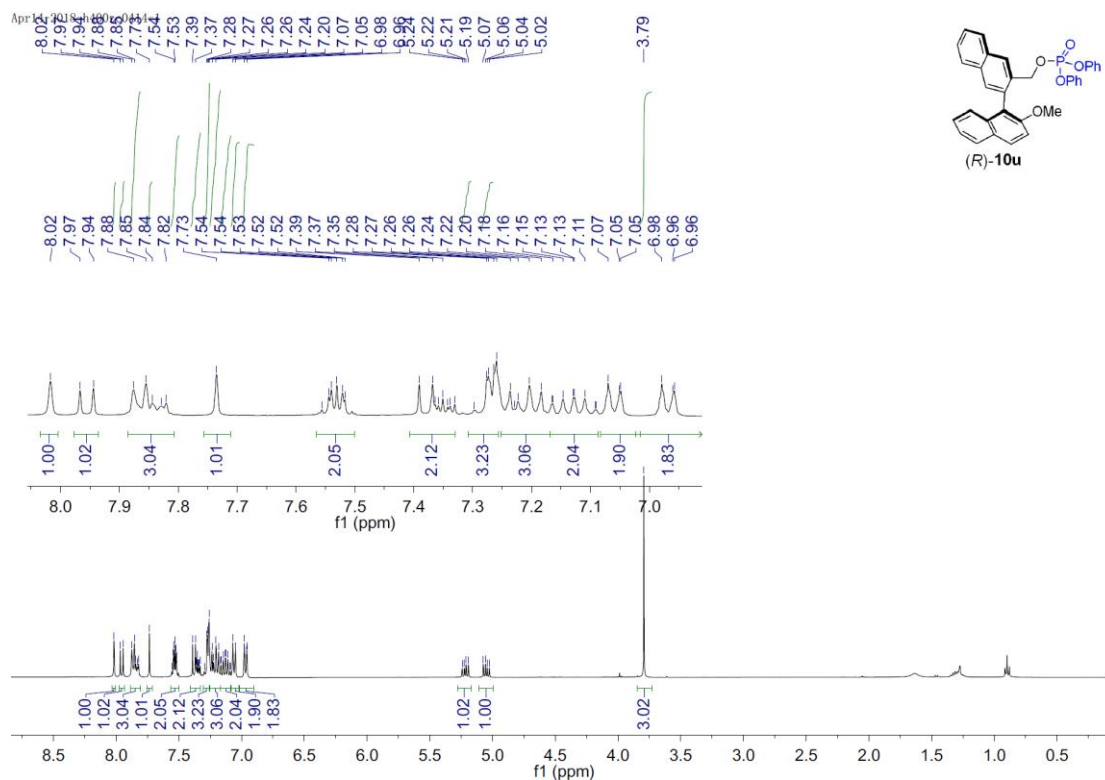

**Figure S103.**  $^1\text{H}$  NMR spectra (400 MHz) of (R)-10u in  $\text{CDCl}_3$ , related to **Figure 2D**.

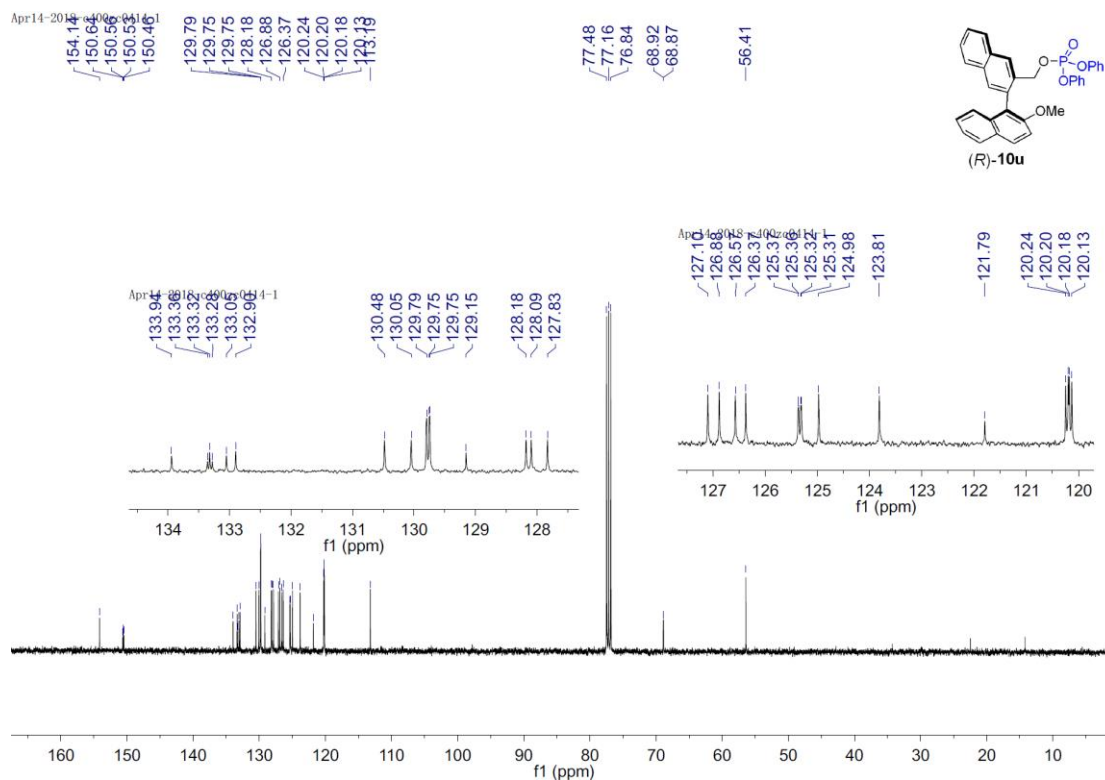

**Figure S104.**  $^{13}\text{C}$  NMR spectra (400 MHz) of (R)-10u in  $\text{CDCl}_3$ , related to **Figure 2D**.

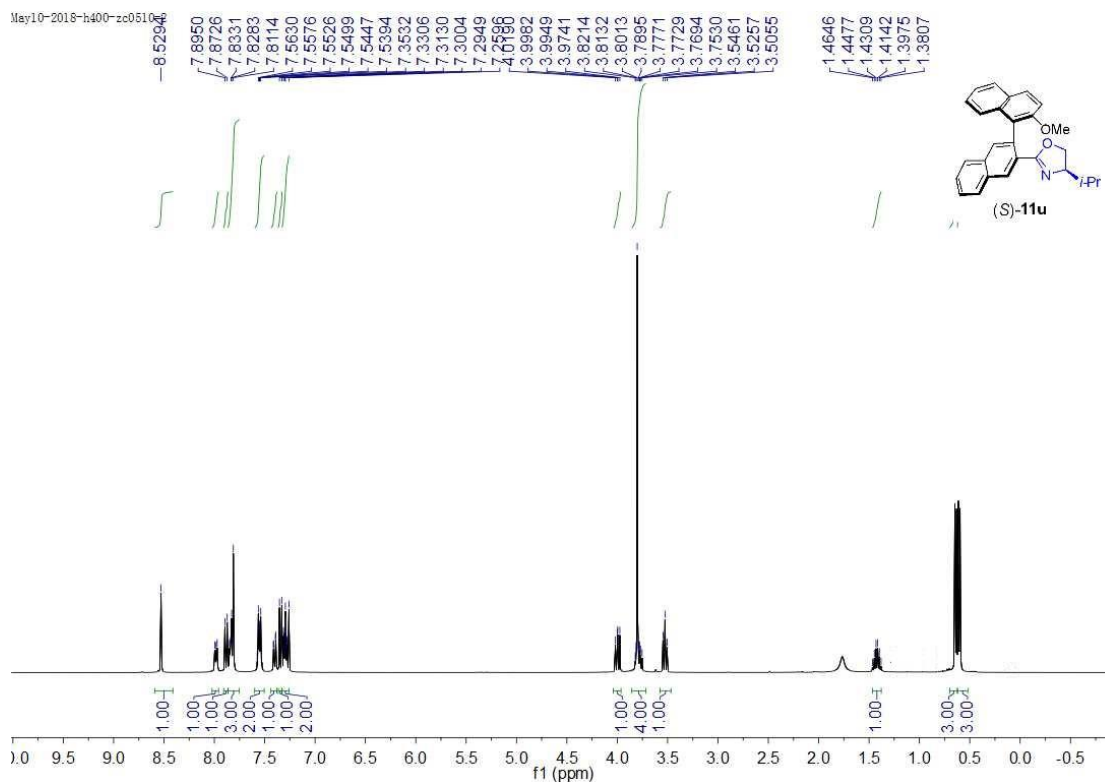

**Figure S105.**  $^1\text{H}$  NMR spectra (400 MHz) of (S)-11u in  $\text{CDCl}_3$ , related to **Figure 2D**.

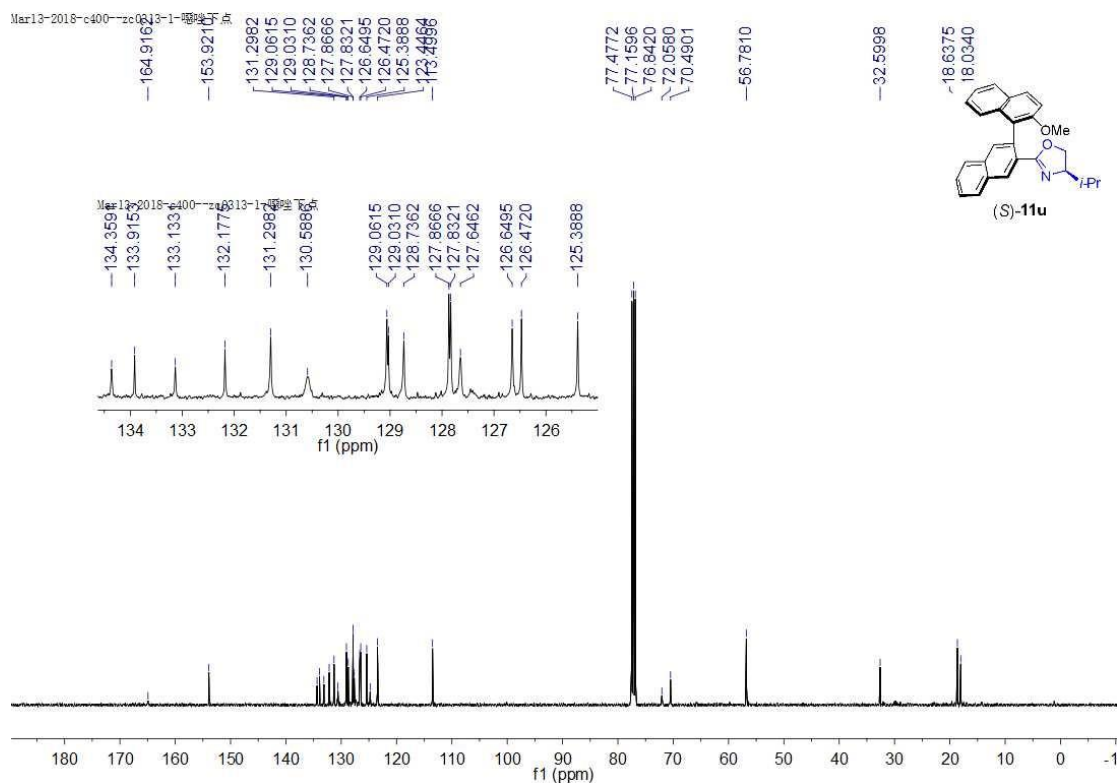

**Figure S106.**  $^{13}\text{C}$  NMR spectra (400 MHz) of (S)-11u in  $\text{CDCl}_3$ , related to **Figure 2D**.

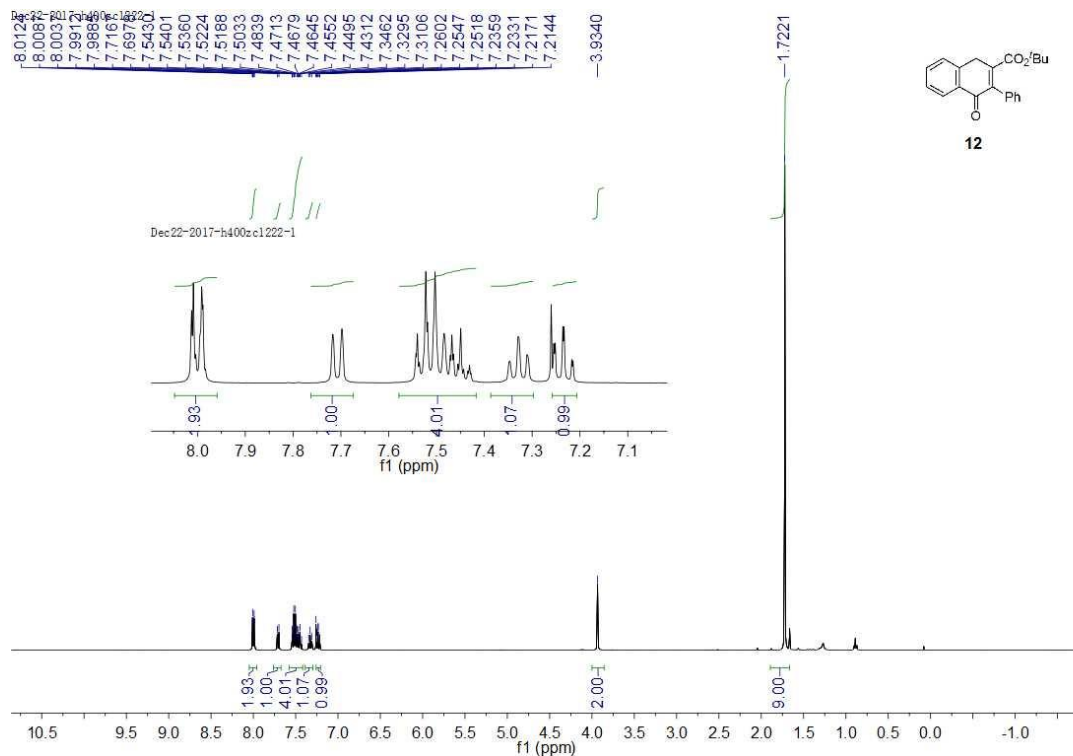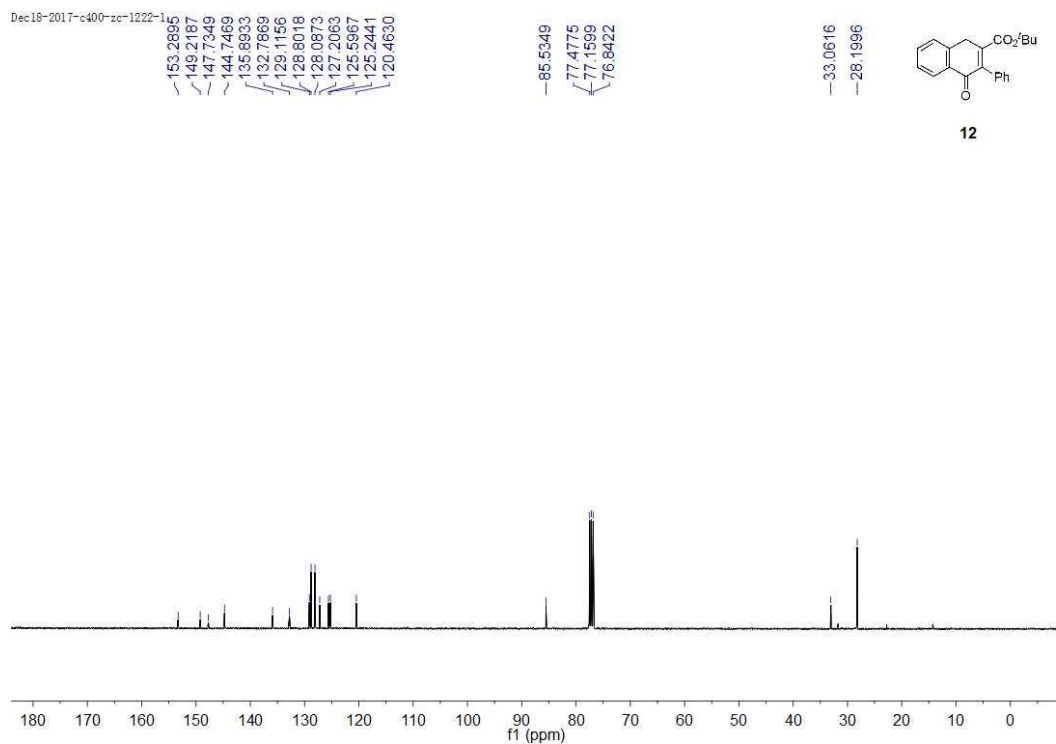

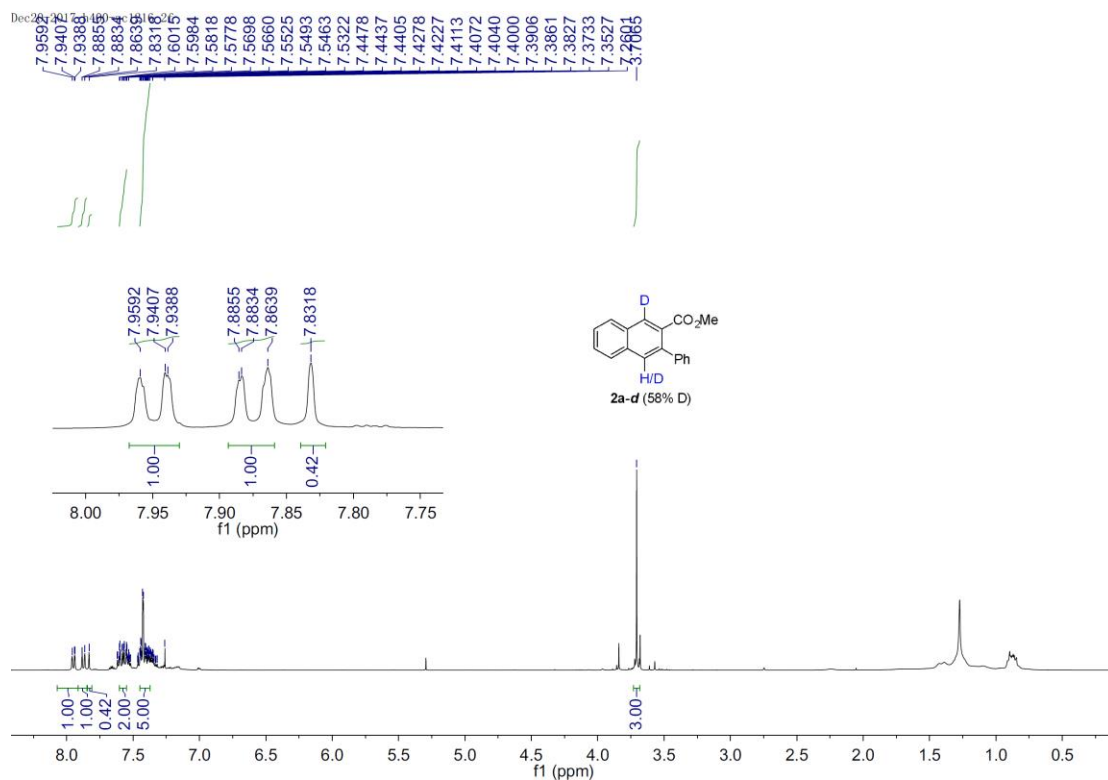

**Figure S109.** Proton NMR of **2a-d** with 58% D, related to **Figure 3B**

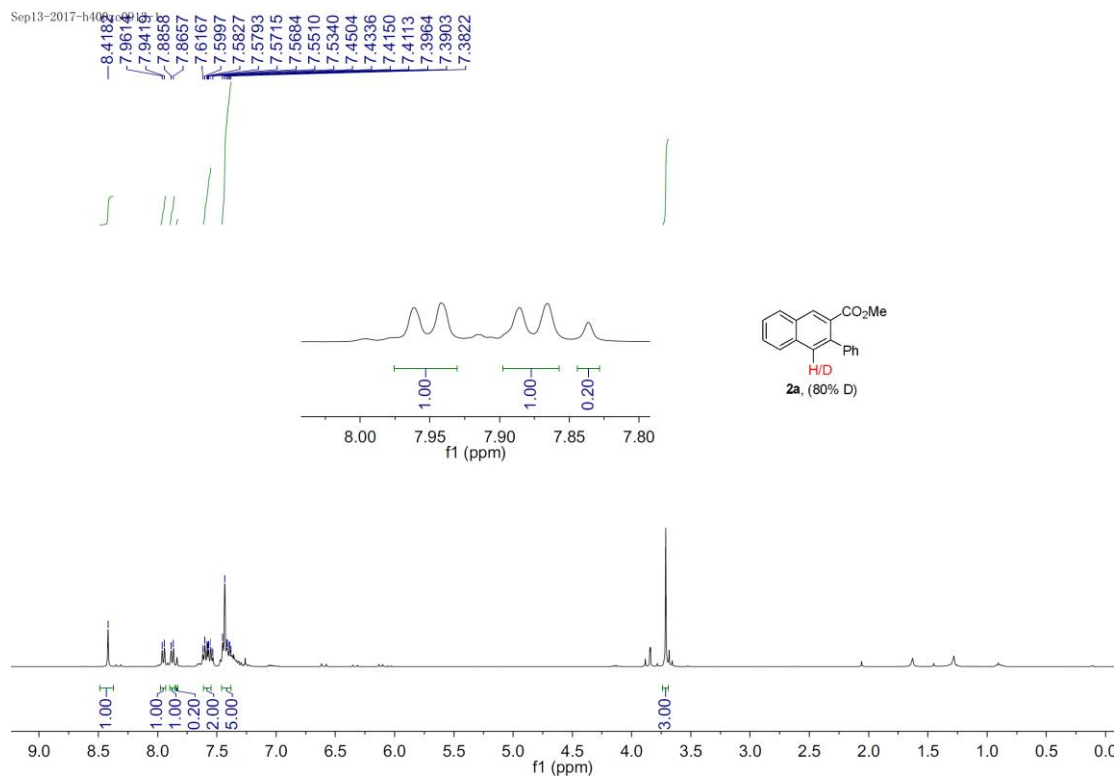

**Figure S110.** Proton NMR of **2a** with 80% D, related to **Figure 3C**.

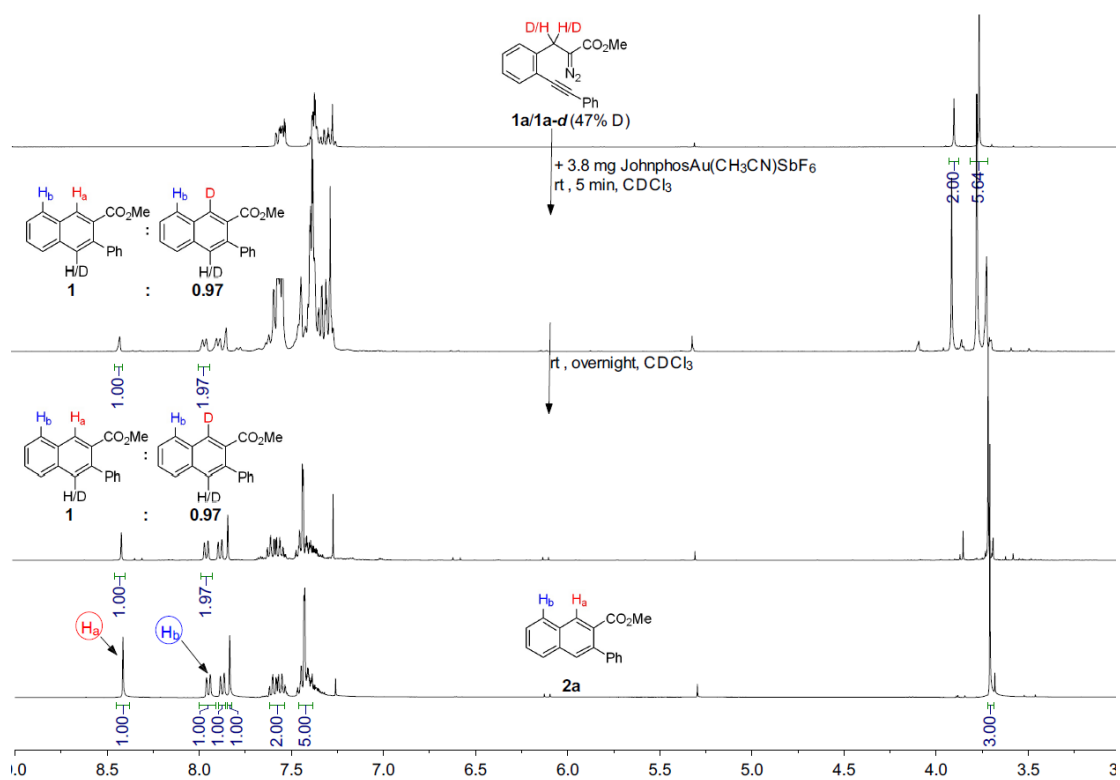

**Figure S111.** Intermolecular Kinetic Isotope Effect (KIE) Experiment, related to **Figure 3D**.

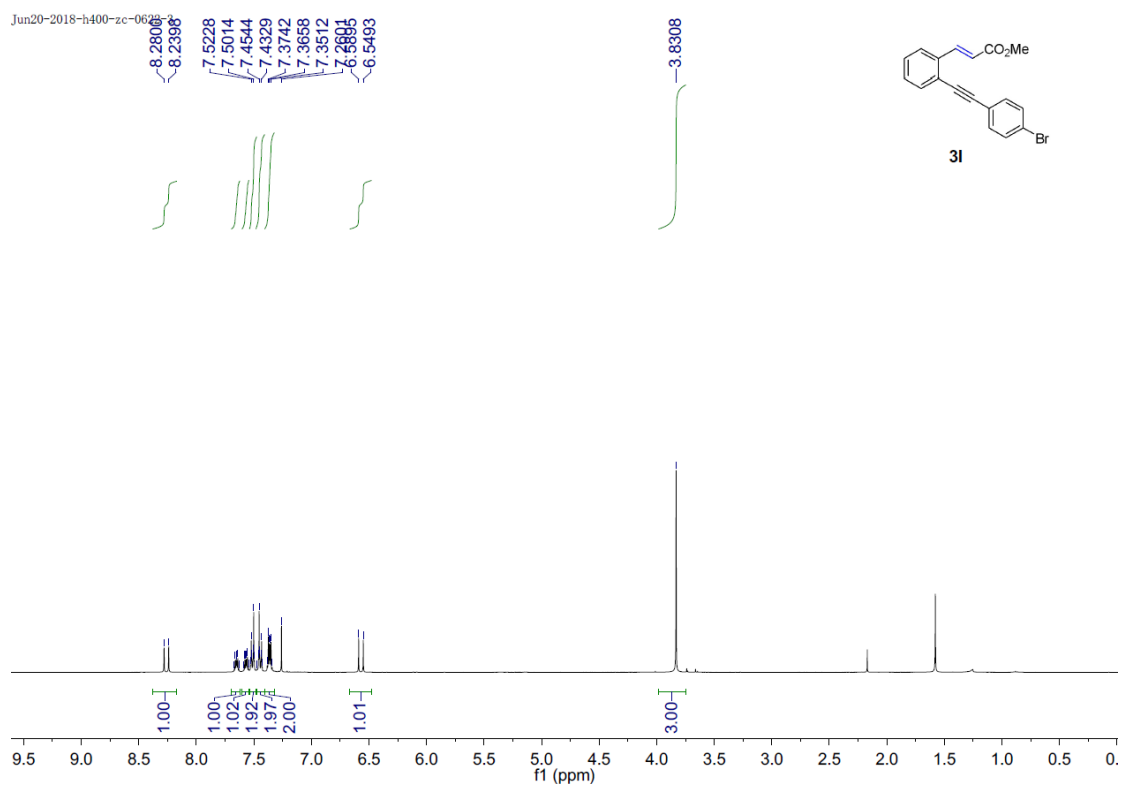

**Figure S112.** <sup>1</sup>H NMR spectra (400 MHz) of **3l** in CDCl<sub>3</sub>, related to **Figure 3E**.

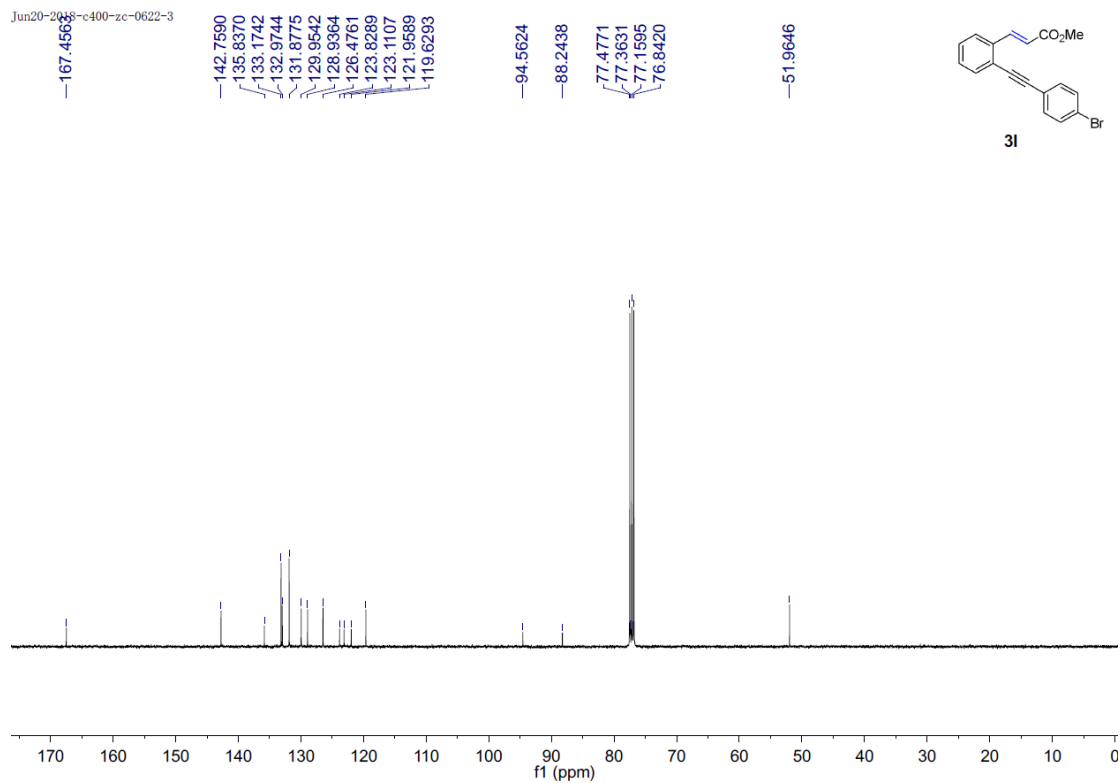

**Figure S113.** <sup>13</sup>C NMR spectra (400 MHz) of **3I** in CDCl<sub>3</sub>, related to **Figure 3E**.

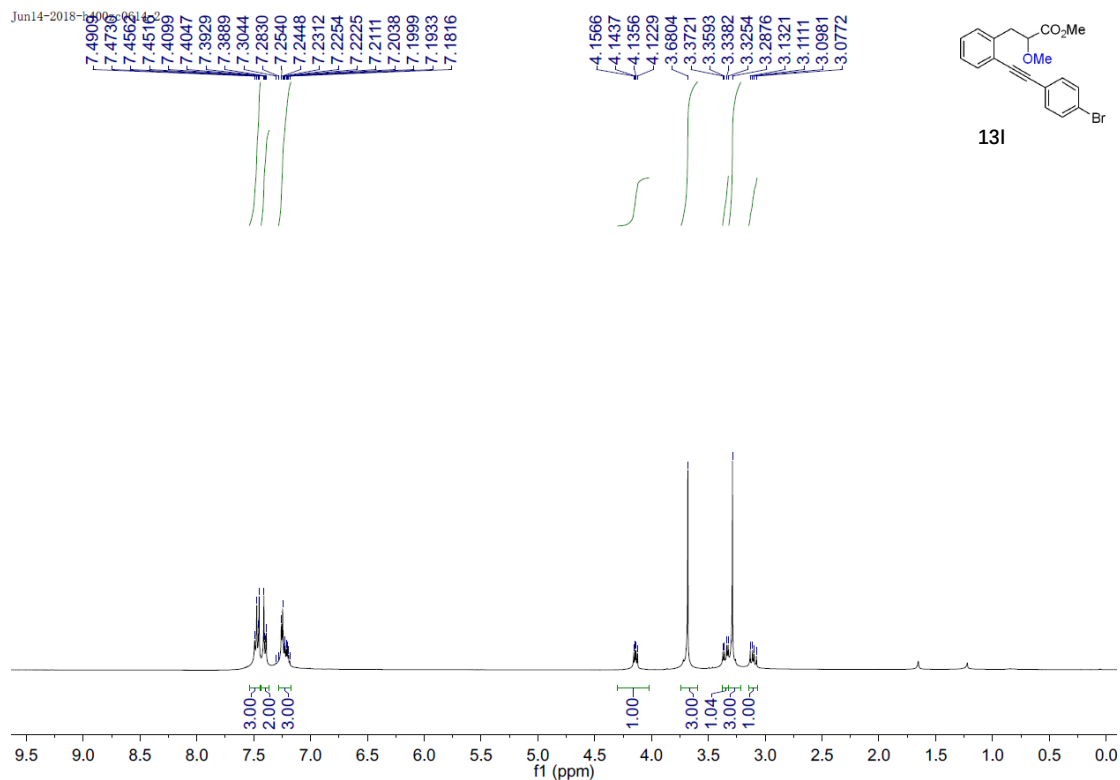

**Figure S114.** <sup>1</sup>H NMR spectra (400 MHz) of **13I** in CDCl<sub>3</sub>, related to **Figure 3E**.

Jun14-2018-c409c0614-2

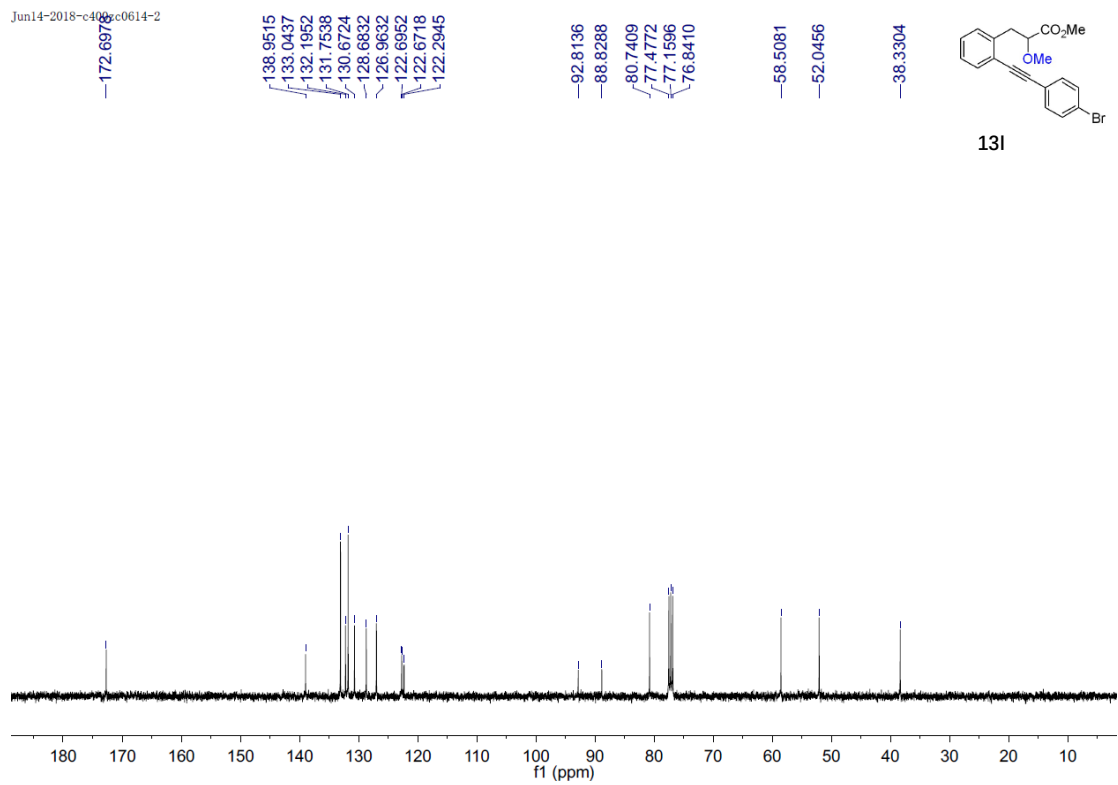

**Figure S115.**  $^{13}\text{C}$  NMR spectra (400 MHz) of **13i** in  $\text{CDCl}_3$ , related to **Figure 3E**.

## Supplemental Tables

**Table S1.** Preparation of Au(I)-Catalysts, related to **Table 1**.

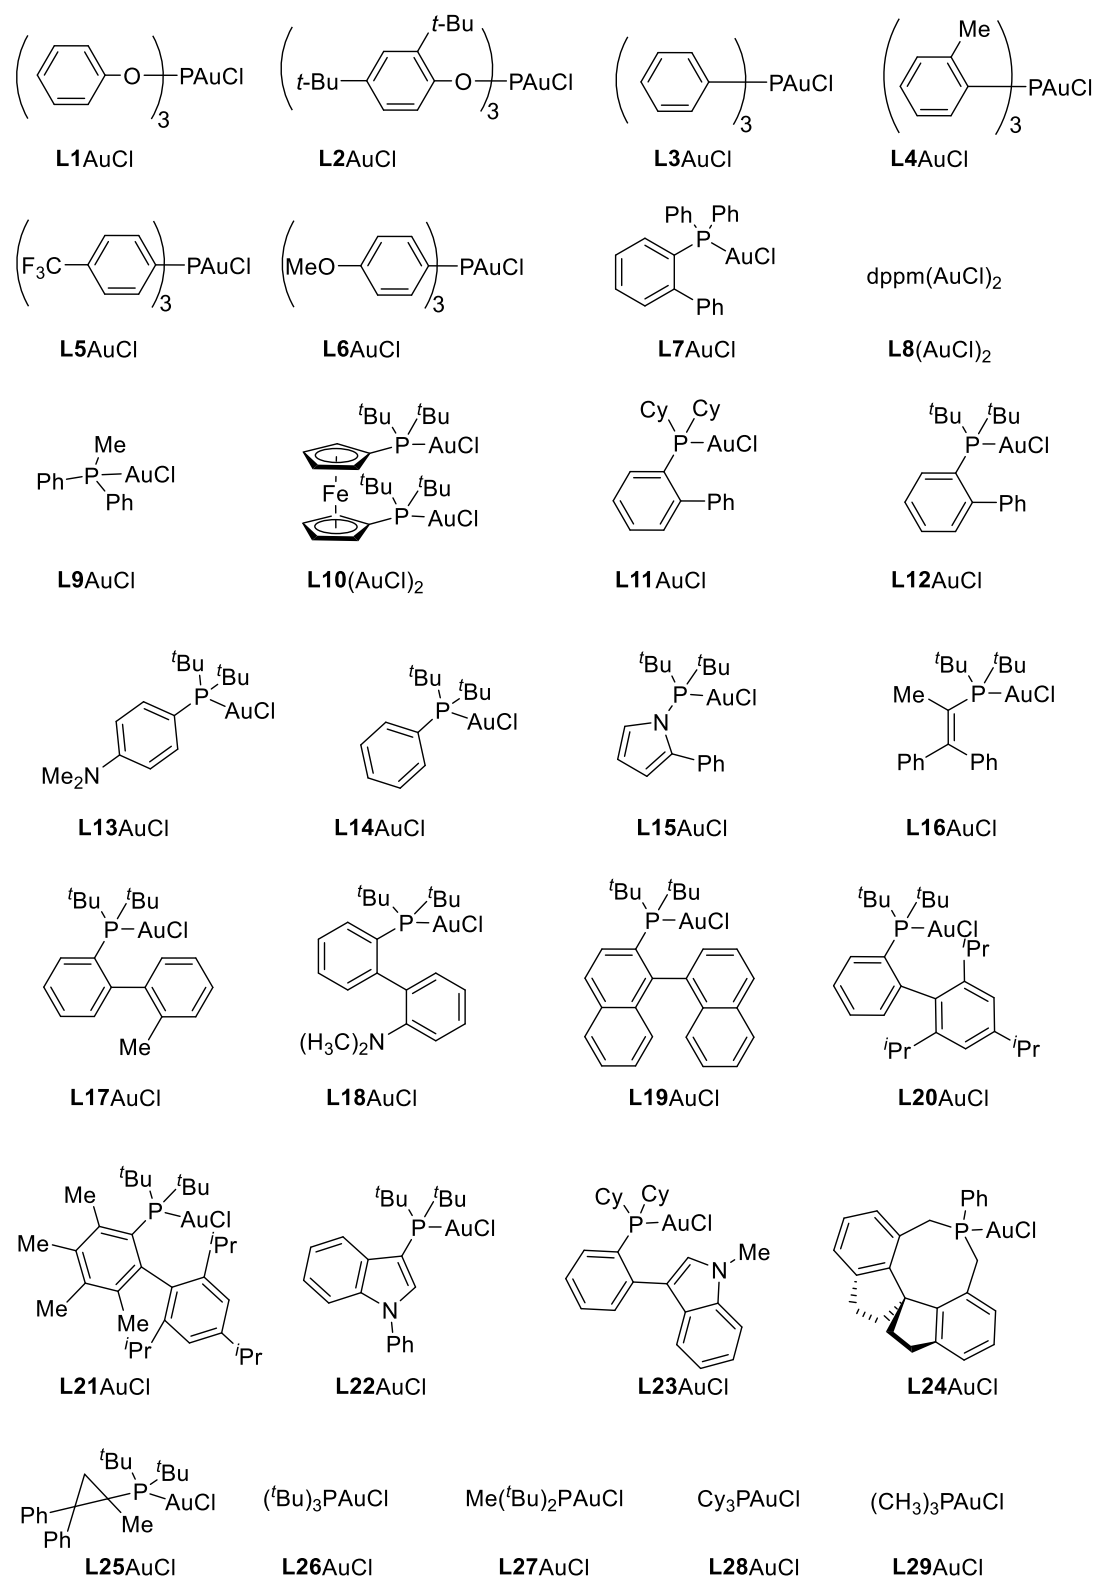



**Table S2.** Ligand Effects on Product Distribution, related to **Table 1.**

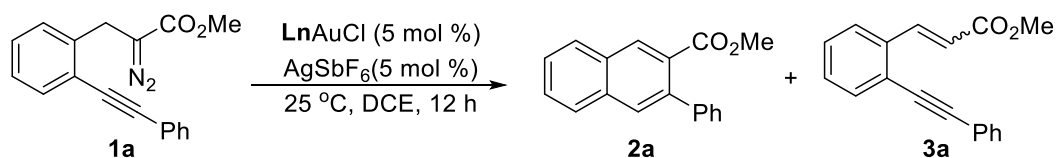

|                        |                        |                        |                        |                        |
|------------------------|------------------------|------------------------|------------------------|------------------------|
|                        |                        |                        |                        |                        |
| <b>L1</b> , 0%; 89%    | <b>L2</b> , 0%; 87%    | <b>L3</b> , 0%; 86%    | <b>L4</b> , < 5%; 85%  | <b>L5</b> , 0%; 65%    |
|                        |                        |                        |                        |                        |
| <b>L6</b> , 0%; 88%    | <b>L7</b> , < 5%; 75%  | <b>L8</b> , 0%; 85%    | <b>L9</b> , 0%; 84%    | <b>L10</b> , < 5%; 86% |
|                        |                        |                        |                        |                        |
| <b>L11</b> , 41%; 55%  | <b>L12</b> , 92%; < 5% | <b>L13</b> , 0%; 78%   | <b>L14</b> , 0%; 73%   | <b>L15</b> , 75/25     |
|                        |                        |                        |                        |                        |
| <b>L16</b> , 70%; 26%  | <b>L17</b> , 92%; < 5% | <b>L18</b> , 52%; 42%  | <b>L19</b> , 92%; < 5% | <b>L20</b> , 94%; < 5% |
|                        |                        |                        |                        |                        |
| <b>L21</b> , 92%; < 5% | <b>L22</b> , 56%; 40%  | <b>L23</b> , 45%; 50%  | <b>L24</b> , 0%; 95%   |                        |
|                        |                        |                        |                        |                        |
| <b>L25</b> , 71%; 25%  | <b>L26</b> , 0%; 93%   | <b>L27</b> , < 5%; 81% | <b>L28</b> , 0%; 95%   | <b>L29</b> , 0%; 79%   |



**Table S4. HPLC spectra of compound (R)-10u, related to Figure 2D.**

Condition: hexane : 2-propanol = 90:10.

Flow rate = 1.0 mL/min,  $\lambda = 272$  nm, Chiral IA-3.

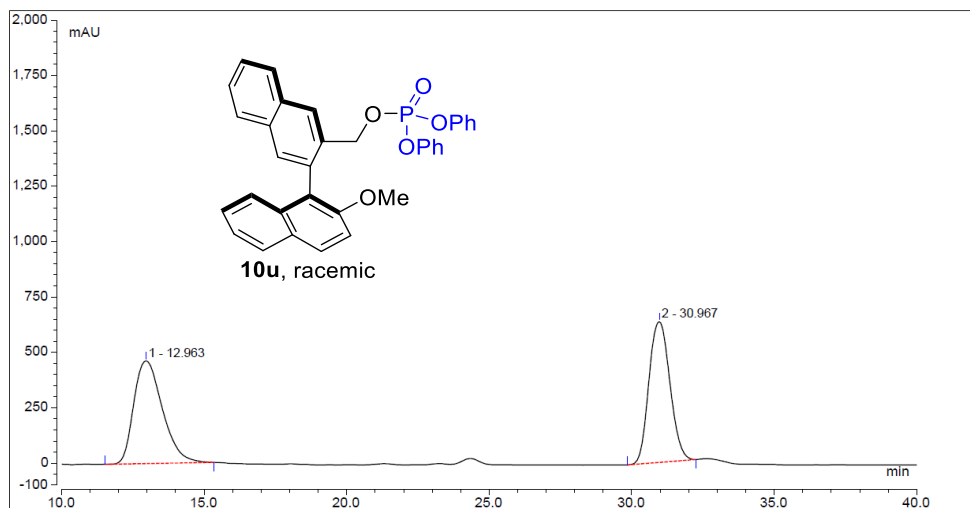

| Entry | RT min | Area mAU*min | Height mAU | % Area % | % Height % |
|-------|--------|--------------|------------|----------|------------|
| 1     | 12.963 | 540.076      | 464.056    | 49.88    | 42.21      |
| 2     | 30.967 | 542.598      | 635.364    | 50.12    | 57.79      |

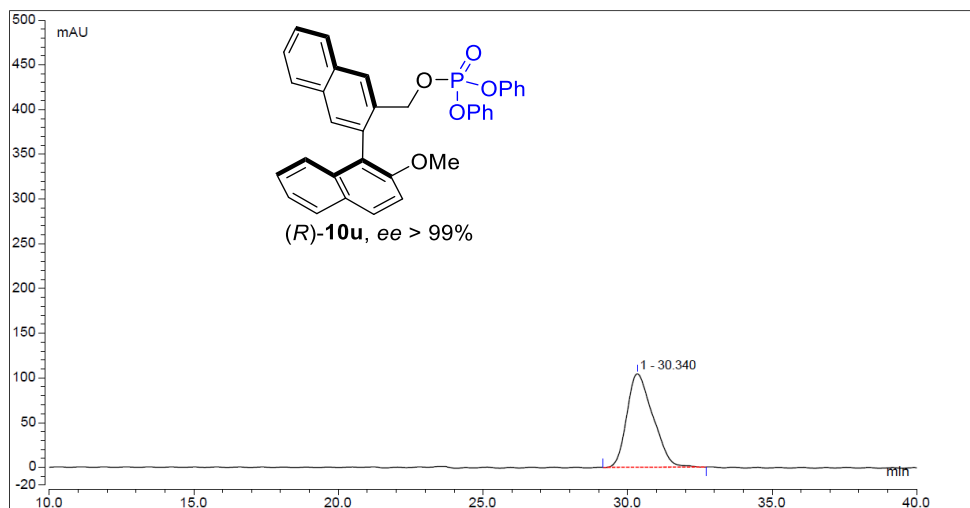

| Entry | RT min | Area mAU*min | Height mAU | % Area % | % Height % |
|-------|--------|--------------|------------|----------|------------|
| 1     | 30.340 | 108.702      | 104.607    | 100.00   | 100.00     |

## Transparent Methods

### General Information

All of the reactions were carried out under argon atmosphere using oven-dried glassware. Super dry dichloroethane (DCE), ethyl diazoacetate, indoles, phosphine ligand, and metal catalysts were purchased from chemical companies and were used without further treatment. Flash column chromatography was performed using a silica gel (300-400 mesh). Analytical thin-layer chromatography was performed using glass plates precoated with 200-300 mesh silica gel impregnated with a fluorescent indicator (254 nm). All of the new compounds were fully characterized.  $^1\text{H}$  NMR and  $^{13}\text{C}$  NMR spectra were recorded in  $\text{CDCl}_3$  or  $\text{DMSO-}d_6$  using a 400/600 MHz spectrometer, and chemical shifts are reported in ppm with the solvent signals as the reference, and coupling constants ( $J$ ) are given in Hz. The peak information is described as: s = singlet, br = broad, d = doublet, t = triplet, q = quartet, m = multiplet, and comp = composite. High-resolution mass spectra (HRMS) were recorded using a commercial apparatus (ESI Source).

## Experimental Procedures

### General Procedure for the Preparation of Diazo Compounds 1a - 1u, related to Scheme 1.

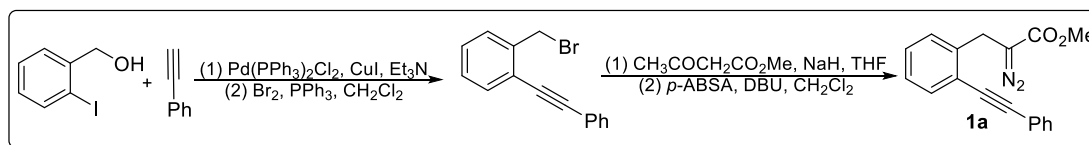

**Synthesis of 1-(bromomethyl)-2-(phenylethynyl)benzene:** To a solution of (2-iodophenyl)methanol (9.36 g, 40.0 mmol), Pd(PPh<sub>3</sub>)<sub>2</sub>Cl<sub>2</sub> (280.8 mg, 1.0 mol %), CuI (76.2 mg, 1.0 mol%) in Et<sub>3</sub>N (40.0 mL), was added a solution of phenylacetylene (4.91 g, 48.0 mmol) in Et<sub>3</sub>N (20.0 mL) slowly at 0 °C under argon atmosphere. The reaction mixture was stirred overnight and the reaction temperature was warmed to room temperature slowly. Upon completion (monitored by TLC), the solvent was evaporated under vacuum after filtering through Celite, and the obtained (2-(phenylethynyl)phenyl)methanol was directly used for the next step without further purification.

To a 100 mL oven-dried round-bottom flask containing a magnetic stirring bar, triphenylphosphine (12.60 g, 48.0 mmol) in CH<sub>2</sub>Cl<sub>2</sub> (40.0 mL), was added bromine (7.67 g, 48.0 mmol) dropwise, and the mixture was stirred vigorously at ambient temperature for 30 min. Then a solution of the above obtained product in CH<sub>2</sub>Cl<sub>2</sub> (16.0 mL) was added to the reaction mixture dropwise and the reaction mixture was stirred for additional 1 hour. *n*-Hexane (40.0 mL) was then added to quench the reaction, and the solvent was evaporated under vacuum after filtering through Celite. The residue was purified by flash chromatography on Al<sub>2</sub>O<sub>3</sub> (ethyl acetate/petroleum ether = 1/20) to afford the product 1-(bromomethyl)-2-(phenylethynyl)benzene (9.65 g, 89 % based on (2-iodophenyl)methanol).

**Synthesis of 1a:** To a 100 mL oven-dried round-bottom flask containing a magnetic stirring bar, sodium hydride (60 % dispersion in mineral oil, 0.60 g, 15.0 mmol) in dry THF (30 mL), was added methyl acetoacetate (1.74 g, 15.0 mmol) dropwise at 0 °C under nitrogen atmosphere. After the mixture turned clear, a solution of 1-(bromomethyl)-2-(phenylethynyl)benzene (2.71 g, 10.0 mmol) in THF (10.0 mL) was added dropwise at ambient temperature, and the reaction was refluxed for 4 hours. Saturated NH<sub>4</sub>Cl (20.0 mL) was added to quench the reaction, the organic phase was separated, and the aqueous layer was extracted with Et<sub>2</sub>O (3 × 20.0 mL). The combined organic layers were washed with brine, dried over anhydrous Na<sub>2</sub>SO<sub>4</sub>. The solvent was evaporated under vacuum after filtration, and the residue was directly used for the next step without further purification.

To a 50-mL oven-dried flask containing a magnetic stirring bar, the above obtained crude product, 4-acetamidobenzenesulfonyl azide (*p*-ABSA, 2.89 g, 12.0 mmol) in DCM (20.0 mL), was added a solution of 1,8-diazabicyclo[5.4.0]undec-7-ene (DBU, 2.29 mg, 15.0 mmol) in DCM (5.0 mL) slowly at 0 °C. The reaction mixture was

stirred at 0 °C for 12 hours. Upon completion (monitored by TLC), the solvent was evaporated under vacuum after filtering through Celite, and the resulting residues was purified by column chromatography on silica gel (ethyl acetate/petroleum ether = 1/10) to give the pure diazoacetate **1a** (2.06 g, 71% yields based on 1-(bromomethyl)-2-(phenylethynyl)benzene).

The synthesis of other substrates (**1b-1u**) is similar to that of **1a**.

#### Methyl 2-diazo-3-(2-(phenylethynyl)phenyl)propanoate.

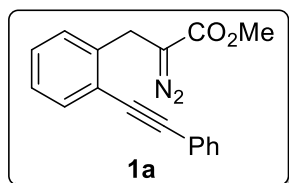

2.06 g, 71% yield. <sup>1</sup>H NMR (400 MHz, CDCl<sub>3</sub>) (δ, ppm) 7.50 – 7.43 (comp, 3H), 7.31 – 7.24 (comp, 4H), 7.23 – 7.16 (comp, 2H), 3.81 (s, 2H), 3.67 (s, 3H); <sup>13</sup>C NMR (100 MHz, CDCl<sub>3</sub>) (δ, ppm) 167.8, 139.4, 132.7, 131.7, 129.3, 128.8, 128.6, 128.5, 127.3, 123.1, 123.0, 94.2, 87.4, 52.1, 28.3. HRMS (TOF MS ESI<sup>+</sup>) calculated for C<sub>18</sub>H<sub>14</sub>N<sub>2</sub>NaO<sub>2</sub><sup>+</sup> [M+Na]<sup>+</sup>: 313.0953, found 313.0939.

#### Isopropyl 2-diazo-3-(2-(phenylethynyl)phenyl)propanoate.

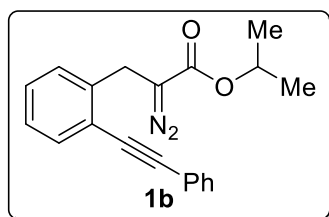

1.97 g, 62% yield. <sup>1</sup>H NMR (400 MHz, CDCl<sub>3</sub>) (δ, ppm) 7.58 – 7.51 (comp, 3H), 7.39 – 7.34 (comp, 4H), 7.33 – 7.24 (comp, 2H), 5.18 – 4.98 (m, 1H), 3.88 (s, 2H), 1.23 (d, *J* = 6.3 Hz, 6H); <sup>13</sup>C NMR (100 MHz, CDCl<sub>3</sub>) (δ, ppm) 166.9, 139.6, 132.7, 131.7, 129.4, 128.7, 128.6, 128.5, 127.2, 123.2, 123.1, 94.1, 87.5, 68.5, 28.3, 22.2. HRMS (TOF MS ESI<sup>+</sup>) calculated for C<sub>20</sub>H<sub>19</sub>N<sub>2</sub>O<sub>2</sub><sup>+</sup> [M+H]<sup>+</sup>: 319.1441, found 319.1438.

#### *tert*-Butyl 2-diazo-3-(2-(phenylethynyl)phenyl)propanoate.

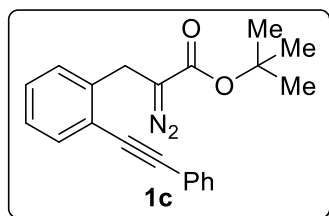

2.30 g, 69% yield. <sup>1</sup>H NMR (400 MHz, CDCl<sub>3</sub>) (δ, ppm) 7.58 – 7.53 (comp, 3H), 7.40 – 7.33 (comp, 5H), 7.33 – 7.23 (m, 2H), 3.85 (s, 2H), 1.47 (s, 9H); <sup>13</sup>C NMR (100 MHz, CDCl<sub>3</sub>) (δ, ppm) 166.9, 139.6, 132.7, 131.7, 129.4, 128.7, 128.6, 128.5, 127.2, 123.2, 123.1, 94.1, 87.5, 68.5, 28.3, 22.2. HRMS (TOF MS ESI<sup>+</sup>) calculated for C<sub>21</sub>H<sub>21</sub>N<sub>2</sub>O<sub>2</sub><sup>+</sup> [M+H]<sup>+</sup>: 333.1598, found 333.1596.

**Benzyl 2-diazo-3-(2-(phenylethynyl)phenyl)propanoate.**

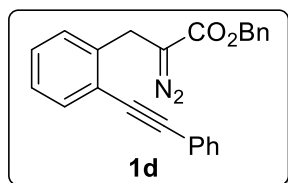

2.20 g, 60% yield.  $^1\text{H}$  NMR (400 MHz,  $\text{CDCl}_3$ ) ( $\delta$ , ppm) 7.64 – 7.55 (comp, 4H), 7.42 – 7.39 (comp, 4H), 7.38 – 7.36 (comp, 4H), 7.34 – 7.29 (comp, 2H), 5.26 (s, 2H), 3.96 (s, 2H);  $^{13}\text{C}$  NMR (100 MHz,  $\text{CDCl}_3$ ) ( $\delta$ , ppm) 167.1, 139.3, 136.1, 132.7, 131.6, 129.3, 128.7, 128.6, 128.4, 128.2, 128.1, 127.3, 122.61, 122.56, 94.2, 87.4, 66.5, 28.3. HRMS (TOF MS  $\text{ESI}^+$ ) calculated for  $\text{C}_{24}\text{H}_{19}\text{N}_2\text{O}_2^+$   $[\text{M}+\text{H}]^+$ : 367.1441, found 367.1435.

**Cinnamyl 2-diazo-3-(2-(phenylethynyl)phenyl)propanoate.**

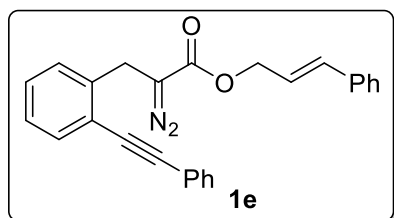

2.28 g, 58% yield.  $^1\text{H}$  NMR (400 MHz,  $\text{CDCl}_3$ ) ( $\delta$ , ppm) 7.61 – 7.53 (comp, 4H), 7.40 – 7.35 (comp, 8H), 7.30 – 7.27 (comp, 2H), 6.67 – 6.59 (m, 1H), 6.32 – 6.23 (m, 1H), 4.86 – 4.81 (m, 2H), 3.93 (s, 2H);  $^{13}\text{C}$  NMR (100 MHz,  $\text{CDCl}_3$ ) ( $\delta$ , ppm) 167.1, 139.3, 136.3, 134.1, 132.7, 131.7, 129.4, 128.8, 128.7, 128.6, 128.5, 128.1, 127.3, 126.7, 123.5, 123.11, 123.06, 94.2, 87.4, 65.4, 28.4. HRMS (TOF MS  $\text{ESI}^+$ ) calculated for  $\text{C}_{26}\text{H}_{21}\text{N}_2\text{O}_2^+$   $[\text{M}+\text{H}]^+$ : 393.1598, found 393.1599.

**Methyl 2-diazo-3-(2-(*p*-tolylethynyl)phenyl)propanoate.**

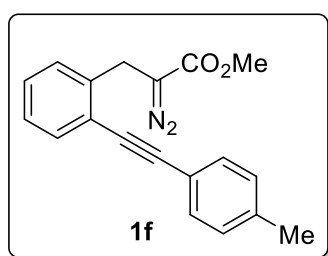

2.19 g, 72% yield.  $^1\text{H}$  NMR (400 MHz,  $\text{CDCl}_3$ ) ( $\delta$ , ppm) 7.55 (d,  $J = 7.5$  Hz, 1H), 7.42 (d,  $J = 7.9$  Hz, 2H), 7.37 – 7.33 (m, 1H), 7.31 – 7.24 (comp, 2H), 7.17 (d,  $J = 7.9$  Hz, 2H), 3.88 (s, 2H), 3.75 (s, 3H), 2.38 (s, 3H);  $^{13}\text{C}$  NMR (100 MHz,  $\text{CDCl}_3$ ) ( $\delta$ , ppm) 167.7, 139.3, 138.8, 132.6, 131.6, 129.31, 129.26, 128.6, 127.3, 123.2, 120.1, 94.4, 86.8, 52.0, 28.3, 21.6. HRMS (TOF MS  $\text{ESI}^+$ ) calculated for  $\text{C}_{19}\text{H}_{16}\text{N}_2\text{NaO}_2^+$   $[\text{M}+\text{Na}]^+$ : 327.1104, found 327.1098.

**Methyl 2-diazo-3-(2-(*m*-tolylethynyl)phenyl)propanoate.**

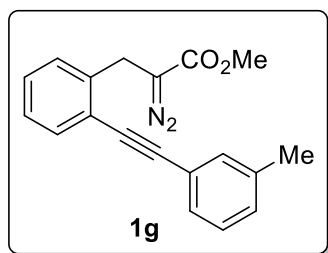

2.22 g, 73% yield.  $^1\text{H}$  NMR (600 MHz,  $\text{CDCl}_3$ ) ( $\delta$ , ppm) 7.58 – 7.54 (m, 1H), 7.49 (d,  $J = 7.5$  Hz, 1H), 7.37 – 7.33 (m, 1H), 7.33 – 7.27 (comp, 2H), 7.26 – 7.23 (comp, 2H), 7.21 – 7.16 (m, 1H), 3.90 (s, 2H), 3.75 (s, 3H), 2.51 (s, 3H);  $^{13}\text{C}$  NMR (150 MHz,  $\text{CDCl}_3$ ) ( $\delta$ , ppm) 167.8, 145.9, 140.2, 139.0, 132.8, 132.1, 129.7, 128.8, 128.7, 127.3, 125.8, 123.4, 123.0, 93.2, 91.3, 52.1, 28.3, 21.0. HRMS (TOF MS  $\text{ESI}^+$ ) calculated for  $\text{C}_{19}\text{H}_{16}\text{N}_2\text{NaO}_2^+$  [ $\text{M}+\text{Na}$ ] $^+$ : 327.1104, found 327.1102.

**Methyl 2-diazo-3-(2-(*o*-tolylethynyl)phenyl)propanoate.**

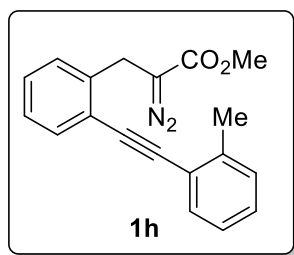

1.98 g, 65% yield.  $^1\text{H}$  NMR (600 MHz,  $\text{CDCl}_3$ ) ( $\delta$ , ppm) 7.51 – 7.47 (m, 1H), 7.30 – 7.28 (comp, 2H), 7.27 – 7.24 (m, 1H), 7.23 – 7.21 (m, 1H), 7.21 – 7.17 (comp, 2H), 7.11 (d,  $J = 7.6$  Hz, 1H), 3.83 (s, 2H), 3.70 (s, 3H), 2.31 (s, 3H);  $^{13}\text{C}$  NMR (100 MHz,  $\text{CDCl}_3$ ) ( $\delta$ , ppm) 171.3, 139.4, 138.2, 132.7, 132.3, 129.5, 129.3, 128.8, 128.7, 128.4, 127.3, 123.2, 123.0, 94.4, 87.1, 52.1, 28.3, 21.4. HRMS (TOF MS  $\text{ESI}^+$ ) calculated for  $\text{C}_{19}\text{H}_{16}\text{N}_2\text{NaO}_2^+$  [ $\text{M}+\text{Na}$ ] $^+$ : 327.1104, found 327.1107.

**Methyl 2-diazo-3-(2-((4-methoxyphenyl)ethynyl)phenyl)propanoate.**

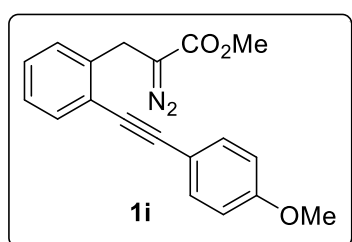

1.67 g, 52% yield.  $^1\text{H}$  NMR (600 MHz,  $\text{CDCl}_3$ ) ( $\delta$ , ppm) 7.54 (d,  $J = 7.3$  Hz, 1H), 7.48 – 7.45 (m, 2H), 7.34 (d,  $J = 7.3$  Hz, 1H), 7.30 – 7.23 (m, 2H), 6.90 (d,  $J = 8.7$  Hz, 2H), 3.87 (s, 2H), 3.83 (s, 3H), 3.75 (s, 3H);  $^{13}\text{C}$  NMR (150 MHz,  $\text{CDCl}_3$ ) ( $\delta$ , ppm) 167.7, 159.9, 139.1, 133.2, 132.5, 129.3, 128.4, 127.3, 123.4, 115.2, 114.1, 94.3, 86.2, 55.4, 52.0, 28.3. HRMS (TOF MS  $\text{ESI}^+$ ) calculated for  $\text{C}_{19}\text{H}_{17}\text{N}_2\text{O}_3^+$  [ $\text{M}+\text{H}$ ] $^+$ : 321.1234, found 321.1227.



**Methyl 2-diazo-3-(2-((4-fluorophenyl)ethynyl)phenyl)propanoate.**

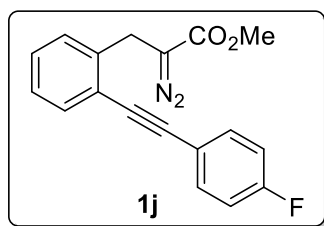

2.16 g, 70% yield.  $^1\text{H}$  NMR (400 MHz,  $\text{CDCl}_3$ ) ( $\delta$ , ppm) 7.45 – 7.38 (comp, 3H), 7.25 – 7.21 (m, 1H), 7.21 – 7.17 (m, 1H), 7.17 – 7.12 (m, 1H), 6.98 – 6.91 (comp, 2H), 3.76 (s, 2H), 3.63 (s, 3H);  $^{13}\text{C}$  NMR (100 MHz,  $\text{CDCl}_3$ ) ( $\delta$ , ppm) 167.6, 162.7 (d,  $J = 249.9$  Hz), 139.3, 133.6 (d,  $J = 8.4$  Hz), 132.7, 129.3, 128.8, 127.3, 122.8, 119.2 (d,  $J = 3.5$  Hz), 115.8 (d,  $J = 22.1$  Hz), 93.1, 87.1, 52.0, 28.3;  $^{19}\text{F}$  NMR (376 MHz,  $\text{CDCl}_3$ )  $\delta$  -110.46. HRMS (TOF MS ESI $^+$ ) calculated for  $\text{C}_{18}\text{H}_{14}\text{FN}_2\text{O}_2^+$   $[\text{M}+\text{H}]^+$ : 309.1034, found 309.1029.

**Methyl 3-(2-((4-chlorophenyl)ethynyl)phenyl)-2-diazopropanoate.**

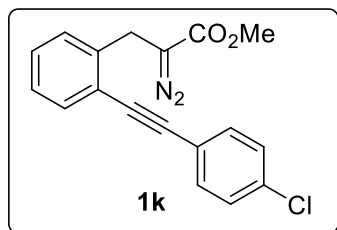

2.14 g, 66% yield.  $^1\text{H}$  NMR (600 MHz,  $\text{CDCl}_3$ ) ( $\delta$ , ppm) 7.54 (d,  $J = 7.6$  Hz, 1H), 7.45 (d,  $J = 8.4$  Hz, 2H), 7.37 – 7.29 (m, 4H), 7.28 – 7.24 (m, 1H), 3.86 (s, 2H), 3.74 (s, 3H);  $^{13}\text{C}$  NMR (150 MHz,  $\text{CDCl}_3$ ) ( $\delta$ , ppm) 167.5, 139.4, 134.6, 132.9, 132.7, 129.3, 129.0, 128.8, 127.3, 122.7, 121.6, 93.0, 88.4, 52.0, 28.3. HRMS (TOF MS ESI $^+$ ) calculated for  $\text{C}_{18}\text{H}_{13}\text{ClN}_2\text{NaO}_2^+$   $[\text{M}+\text{Na}]^+$ : 347.0558, found 347.0550.

**Methyl 3-(2-((4-bromophenyl)ethynyl)phenyl)-2-diazopropanoate.**

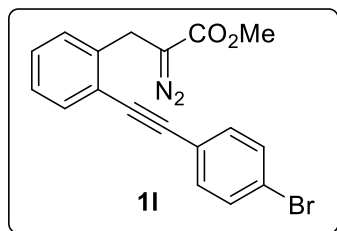

1.96 g, 53% yield.  $^1\text{H}$  NMR (600 MHz,  $\text{CDCl}_3$ ) ( $\delta$ , ppm) 7.49 (d,  $J = 7.4$  Hz, 1H), 7.46 – 7.42 (comp, 2H), 7.35 – 7.31 (comp, 2H), 7.30 – 7.24 (comp, 2H), 7.23 – 7.19 (m, 1H), 3.81 (s, 2H), 3.69 (s, 3H);  $^{13}\text{C}$  NMR (150 MHz,  $\text{CDCl}_3$ ) ( $\delta$ , ppm) 167.7, 139.4, 133.1, 132.8, 131.8, 129.4, 129.0, 127.4, 122.9, 122.7, 122.1, 93.1, 88.6, 52.1, 28.4. HRMS (TOF MS ESI $^+$ ) calculated for  $\text{C}_{18}\text{H}_{13}\text{BrN}_2\text{NaO}_2^+$   $[\text{M}+\text{Na}]^+$ : 391.0053, found 391.0145.

**Methyl 2-diazo-3-(2-((4-(trifluoromethyl)phenyl)ethynyl)phenyl)propanoate.**

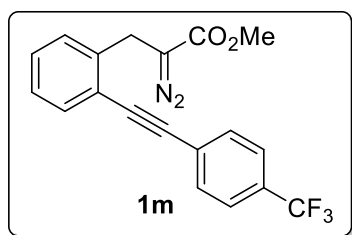

1.97 g, 55% yield.  $^1\text{H}$  NMR (600 MHz,  $\text{CDCl}_3$ ) ( $\delta$ , ppm) 7.70 – 7.47 (comp, 5H), 7.39 – 7.26 (comp, 2H), 7.26 – 7.18 (m, 1H), 3.87 (s, 2H), 3.72 (s, 3H);  $^{13}\text{C}$  NMR (150 MHz,  $\text{CDCl}_3$ ) ( $\delta$ , ppm) 167.3, 139.5, 132.8, 131.8, 130.0 (q,  $J = 32.7$  Hz), 129.3, 129.2, 127.2, 126.8, 125.2 (q,  $J = 3.8$  Hz), 122.2, 92.6, 89.7, 51.8, 28.2. HRMS (TOF MS ESI $^+$ ) calculated for  $\text{C}_{19}\text{H}_{13}\text{F}_3\text{N}_2\text{NaO}_2^+$   $[\text{M}+\text{Na}]^+$ : 381.0821, found 381.0828.

**Methyl 2-diazo-3-(2-(naphthalen-1-ylethynyl)phenyl)propanoate.**

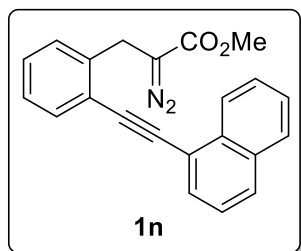

1.67 g, 49% yield.  $^1\text{H}$  NMR (400 MHz,  $\text{CDCl}_3$ ) ( $\delta$ , ppm) 8.45 (d,  $J = 8.3$  Hz, 1H), 7.92 – 7.86 (comp, 2H), 7.83 – 7.79 (m, 1H), 7.74 – 7.70 (m, 1H), 7.68 – 7.61 (m, 1H), 7.60 – 7.54 (m, 1H), 7.53 – 7.47 (m, 1H), 7.45 – 7.40 (m, 1H), 7.39 – 7.32 (comp, 2H), 4.02 (s, 2H), 3.76 (s, 3H);  $^{13}\text{C}$  NMR (100 MHz,  $\text{CDCl}_3$ ) ( $\delta$ , ppm) 167.7, 139.2, 133.3, 133.2, 132.8, 130.7, 129.3, 129.1, 128.9, 128.4, 127.4, 127.0, 126.5, 126.1, 125.4, 123.1, 120.7, 92.3, 92.2, 52.0, 28.4. HRMS (TOF MS ESI $^+$ ) calculated for  $\text{C}_{22}\text{H}_{17}\text{N}_2\text{O}_2^+$   $[\text{M}+\text{H}]^+$ : 341.1285, found 341.1297.

**Methyl 2-diazo-3-(2-((2-methoxynaphthalen-1-yl)ethynyl)phenyl)propanoate.**

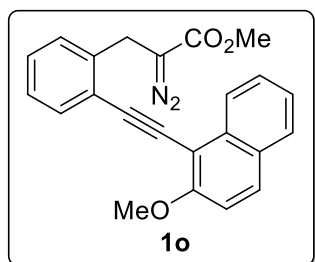

2.11 g, 57% yield.  $^1\text{H}$  NMR (400 MHz,  $\text{CDCl}_3$ ) ( $\delta$ , ppm) 8.30 (d,  $J = 8.3$  Hz, 1H), 7.85 – 7.74 (comp, 2H), 7.70 – 7.65 (m, 1H), 7.59 – 7.52 (m, 1H), 7.45 – 7.33 (comp, 2H), 7.33 – 7.26 (comp, 2H), 7.27 – 7.22 (m, 1H), 4.04 (s, 2H), 4.01 (s, 3H), 3.73 (s, 3H);  $^{13}\text{C}$  NMR (100 MHz,  $\text{CDCl}_3$ ) ( $\delta$ , ppm) 168.2, 159.2, 139.4, 134.3, 132.4, 130.5, 129.3, 128.7, 128.6, 128.2, 127.5, 127.2, 125.3, 124.3, 123.7, 112.6, 106.2, 97.0, 88.9, 56.5, 52.0, 28.0. HRMS (TOF MS ESI $^+$ ) calculated for  $\text{C}_{23}\text{H}_{19}\text{N}_2\text{O}_3^+$   $[\text{M}+\text{H}]^+$ : 371.1390, found 371.1400.

**Methyl 2-diazo-3-(2-(thiophen-2-ylethynyl)phenyl)propanoate.**

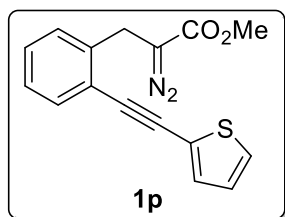

1.24 g, 42% yield.  $^1\text{H}$  NMR (400 MHz,  $\text{CDCl}_3$ ) ( $\delta$ , ppm) 7.52 – 7.48 (m, 1H), 7.34 – 7.26 (comp, 4H), 7.24 – 7.19 (m, 1H), 7.00 – 6.96 (m, 1H), 3.81 (s, 2H), 3.72 (s, 3H);  $^{13}\text{C}$  NMR (100 MHz,  $\text{CDCl}_3$ ) ( $\delta$ , ppm) 167.3, 139.4, 132.5, 132.2, 129.3, 128.9, 127.7, 127.3, 127.2, 123.0, 122.6, 91.1, 87.4, 52.0, 28.4. HRMS (TOF MS  $\text{ESI}^+$ ) calculated for  $\text{C}_{16}\text{H}_{13}\text{N}_2\text{O}_2\text{S}^+ [\text{M}+\text{H}]^+$ : 297.0698, found 297.0694.

**Methyl 3-(2-(cyclopropylethynyl)phenyl)-2-diazopropanoate.**

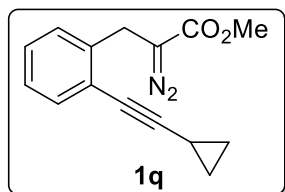

1.35 g, 53% yield.  $^1\text{H}$  NMR (400 MHz,  $\text{CDCl}_3$ ) ( $\delta$ , ppm) 7.43 – 7.38 (m, 1H), 7.32 – 7.26 (m, 1H), 7.26 – 7.16 (comp, 2H), 3.79 (s, 3H), 3.77 (s, 2H), 1.52 – 1.44 (m, 1H), 0.94 – 0.80 (comp, 4H);  $^{13}\text{C}$  NMR (100 MHz,  $\text{CDCl}_3$ ) ( $\delta$ , ppm) 167.7, 139.3, 132.6, 129.1, 127.8, 127.0, 123.7, 98.5, 73.9, 51.9, 28.2, 8.7, 0.4. HRMS (TOF MS  $\text{ESI}^+$ ) calculated for  $\text{C}_{15}\text{H}_{14}\text{N}_2\text{NaO}_2^+ [\text{M}+\text{Na}]^+$ : 277.0947, found 277.0961.

**3-Diazo-4-(2-(phenylethynyl)phenyl)butan-2-one.**

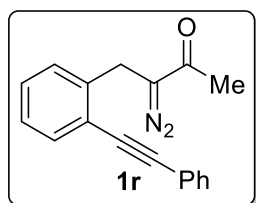

1.67 g, 61% yield.  $^1\text{H}$  NMR (400 MHz,  $\text{CDCl}_3$ ) ( $\delta$ , ppm) 7.60 – 7.53 (comp, 3H), 7.41 – 7.27 (comp, 6H), 3.94 (s, 2H), 2.25 (s, 3H);  $^{13}\text{C}$  NMR (100 MHz,  $\text{CDCl}_3$ ) ( $\delta$ , ppm) 190.5, 139.0, 132.6, 131.6, 129.6, 128.8, 128.6, 128.5, 127.3, 123.0, 94.0, 87.4, 68.2, 27.5. HRMS (TOF MS  $\text{ESI}^+$ ) calculated for  $\text{C}_{18}\text{H}_{14}\text{N}_2\text{NaO}^+ [\text{M}+\text{Na}]^+$ : 297.0998, found 297.0994.

**2-Diazo-1-phenyl-3-(2-(phenylethynyl)phenyl)propan-1-one.**

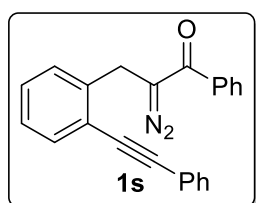

2.42 g, 72% yield.  $^1\text{H}$  NMR (400 MHz,  $\text{CDCl}_3$ ) ( $\delta$ , ppm) 7.61 – 7.55 (comp, 3H), 7.55 – 7.50 (comp, 2H), 7.49 – 7.39 (comp, 3H), 7.39 – 7.32 (comp, 5H), 7.31 – 7.27 (m, 1H), 4.12 (s, 2H);  $^{13}\text{C}$  NMR (100 MHz,  $\text{CDCl}_3$ ) ( $\delta$ , ppm) 189.2, 138.9, 137.7, 132.8, 131.7, 131.5, 129.7, 128.9, 128.6, 128.5, 127.5, 127.3, 123.2, 123.0, 94.3, 87.4, 28.8. HRMS (TOF MS  $\text{ESI}^+$ ) calculated for  $\text{C}_{23}\text{H}_{17}\text{N}_2\text{O}^+$   $[\text{M}+\text{H}]^+$ : 337.1335, found 337.1330.

**Methyl 3-(2-((2-aminophenyl)ethynyl)phenyl)-2-diazo-3-oxopropanoate.**

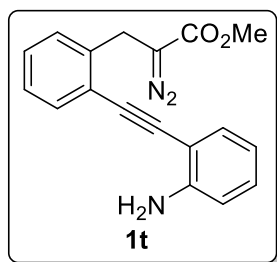

1.22 g, 40% yield.  $^1\text{H}$  NMR (400 MHz,  $\text{CDCl}_3$ ) ( $\delta$ , ppm) 7.58 – 7.53 (m, 1H), 7.38 – 7.24 (comp, 4H), 7.18 – 7.12 (m, 1H), 6.76 – 6.70 (comp, 2H), 4.35 (s, 2H), 3.89 (s, 2H), 3.74 (s, 3H);  $^{13}\text{C}$  NMR (100 MHz,  $\text{CDCl}_3$ ) ( $\delta$ , ppm) 167.7, 148.0, 138.8, 132.6, 132.3, 130.0, 129.1, 128.7, 127.2, 123.1, 117.9, 114.5, 107.6, 92.4, 90.9, 52.0, 28.2. HRMS (TOF MS  $\text{ESI}^+$ ) calculated for  $\text{C}_{18}\text{H}_{15}\text{N}_3\text{NaO}_2^+$   $[\text{M}+\text{Na}]^+$ : 328.1056, found 328.1064.

**(1*R*,2*S*,5*R*)-2-Isopropyl-5-methylcyclohexyl 2-diazo-3-(2-((2-methoxynaphthalen-1-yl)ethynyl)phenyl)propanoate.**

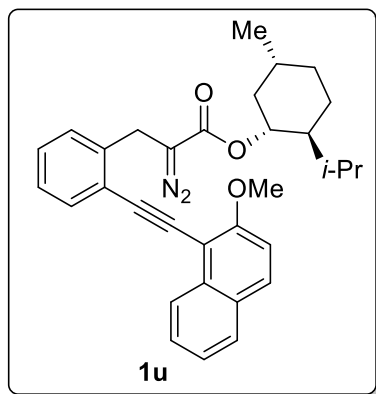

2.92 g, 59% yield.  $^1\text{H}$  NMR (400 MHz,  $\text{CDCl}_3$ ) ( $\delta$ , ppm) 8.32 (d,  $J = 8.4$  Hz, 1H), 7.88 – 7.78 (comp, 2H), 7.72 – 7.66 (m, 1H), 7.60 – 7.54 (m, 1H), 7.46 – 7.37 (comp, 2H), 7.36 – 7.27 (comp, 3H), 4.76 (td,  $J = 10.9, 4.4$  Hz, 1H), 4.06 (s, 2H), 4.05 (s, 3H), 2.04 – 1.95 (m, 1H), 1.70 – 1.60 (comp, 2H), 1.54 – 1.40 (m, 1H), 1.40 – 1.27 (comp, 2H), 1.14 – 1.06 (m, 1H), 1.05 – 0.99 (m, 1H), 0.98 – 0.95 (m, 1H), 0.90 – 0.81 (comp, 6H), 0.75 (d,  $J = 6.9$  Hz, 3H);  $^{13}\text{C}$  NMR (100 MHz,  $\text{CDCl}_3$ ) ( $\delta$ , ppm) 167.2, 159.2, 144.7, 139.8, 134.4, 132.4, 130.5, 128.64, 128.61, 128.3, 127.6, 127.1, 125.3, 124.3, 123.7, 112.6, 106.4, 97.1, 88.8, 74.9, 56.6, 53.6, 47.2, 41.4, 34.7, 34.3, 31.5, 26.0, 22.1, 20.8, 16.2. HRMS (TOF MS  $\text{ESI}^+$ ) calculated for  $\text{C}_{32}\text{H}_{35}\text{N}_2\text{O}_3^+$   $[\text{M}+\text{H}]^+$ : 495.2642, found 495.2650.

## The preparation of diazo compounds **4a** – **4e**, related to Scheme 1.

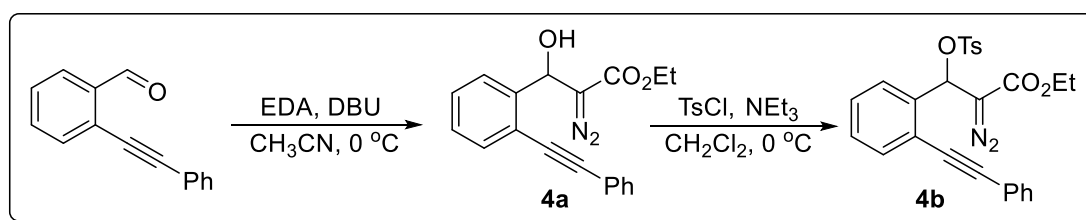

**Synthesis of 4a:** To a solution of ethyl diazoacetate (EDA, 1.37 g, 12.0 mmol) in CH<sub>3</sub>CN (10.0 mL), a solution of 1,8-diazabicyclo[5.4.0]undec-7-ene (DBU 1.53 g, 10.0 mmol) and 2-(phenylethynyl)benzaldehyde (2.07 g, 10.0 mmol) in CH<sub>3</sub>CN (10.0 mL) were added in sequence at 0 °C under nitrogen atmosphere. After the mixture was stirred at 0 °C for 15 hours, the reaction was quenched with saturated aqueous NaHCO<sub>3</sub> and then extracted with CH<sub>2</sub>Cl<sub>2</sub> (3 × 20.0 mL). The combined organic phase was dried over Na<sub>2</sub>SO<sub>4</sub> and the solvent was evaporated under vacuum after filtration. The resulting residues was purified by flash column chromatography on silica gel (ethyl acetate/petroleum ether = 1/3) to afford the pure diazoacetate **4a** (2.85 g, 89% yield based on 2-(phenylethynyl)benzaldehyde).

The synthesis of other substrate **4g** is similar to that of **4a**.

**Synthesis of 4b:** To a solution of diazoacetate **4a** (0.32 g, 1.0 mmol) and 4-toluenesulfonyl chloride (TsCl, 0.19 g, 1.0 mmol) in dry CH<sub>2</sub>Cl<sub>2</sub> (5.0 mL), and triethylamine (0.12 g, 1.2 mmol) in dry CH<sub>2</sub>Cl<sub>2</sub> (1.0 mL) were added in sequence at 0 °C under argon atmosphere. After the mixture was stirred at 0 °C for 15 hours, the reaction was quenched with saturated aqueous NH<sub>4</sub>Cl and extracted with CH<sub>2</sub>Cl<sub>2</sub> (2 × 5.0 mL). Then the combined organic phase was washed with brine and dried over Na<sub>2</sub>SO<sub>4</sub>. The solvent was removed in vacuo after filtration, and the resulting residues was purified by flash column chromatography on silica gel (ethyl acetate/petroleum ether = 1/10) to afford the pure diazoacetates **4b** (370 mg, 78% yield based on **4a**).

The synthesis of other substrates (**4c-4e**) is similar to that of **4b**.

### Ethyl 2-diazo-3-hydroxy-3-(2-(phenylethynyl)phenyl)propanoate.

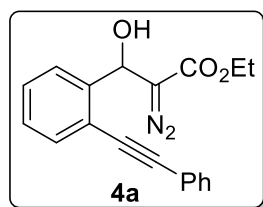

2.85 g, 89% yield. <sup>1</sup>H NMR (400 MHz, CDCl<sub>3</sub>) (δ, ppm) 7.74 (d, *J* = 7.8 Hz, 1H), 7.62 – 7.50 (comp, 3H), 7.45 – 7.38 (m, 1H), 7.37 – 7.28 (comp, 4H), 6.37 (s, 1H), 4.26 – 4.17 (m, 2H), 3.96 (s, 1H), 1.23 – 1.16 (m, 3H); <sup>13</sup>C NMR (100 MHz, CDCl<sub>3</sub>) (δ, ppm) 166.4, 140.9, 132.3, 131.7, 128.7, 128.5, 128.3, 127.9, 125.6, 122.9, 120.7,

95.6, 86.0, 67.5, 61.1, 14.4. HRMS (TOF MS ESI<sup>+</sup>) calculated for C<sub>19</sub>H<sub>16</sub>N<sub>2</sub>NaO<sub>3</sub><sup>+</sup> [M+Na]<sup>+</sup>: 343.1053, found 343.1051.

**Ethyl 2-diazo-3-(2-(phenylethynyl)phenyl)-3-(tosyloxy)propanoate.**

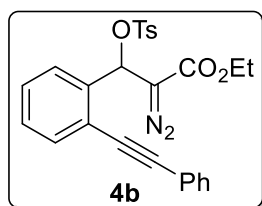

370.0 mg, 78% yield. <sup>1</sup>H NMR (400 MHz, CDCl<sub>3</sub>) (δ, ppm) 7.80 – 7.67 (m, 1H), 7.65 – 7.55 (m, 1H), 7.54 – 7.48 (m, 1H), 7.47 – 7.33 (comp, 4H), 7.33 – 7.15 (comp, 6H), 6.22 (s, 1H), 4.11 – 4.01 (m, 2H), 2.39 (s, 3H), 1.38 – 1.19 (m, 3H); <sup>13</sup>C NMR (100 MHz, CDCl<sub>3</sub>) (δ, ppm) 139.2, 132.5, 131.8, 129.7, 128.6, 128.5, 128.30, 128.25, 128.2, 127.2, 126.4, 125.8, 123.0, 121.6, 95.5, 86.0, 73.1, 61.1, 22.3, 14.4. HRMS (TOF MS ESI<sup>+</sup>) calculated for C<sub>26</sub>H<sub>22</sub>N<sub>2</sub>NaO<sub>5</sub>S<sup>+</sup> [M+Na]<sup>+</sup>: 497.1147, found 497.1141.

**Ethyl 2-diazo-3-(2-(phenylethynyl)phenyl)-3-((trimethylsilyl)oxy)propanoate.**

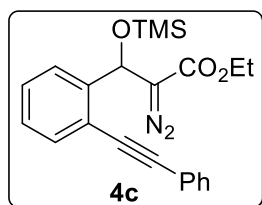

326.0 mg, 83% yield. <sup>1</sup>H NMR (400 MHz, CDCl<sub>3</sub>) (δ, ppm) 7.68 – 7.62 (m, 1H), 7.62 – 7.53 (comp, 3H), 7.42 – 7.32 (comp, 4H), 7.33 – 7.27 (m, 1H), 6.35 (d, *J* = 1.6 Hz, 1H), 4.46 – 3.99 (m, 2H), 1.17 (t, *J* = 7.1 Hz, 3H), 0.19 (s, 9H); <sup>13</sup>C NMR (100 MHz, CDCl<sub>3</sub>) (δ, ppm) 165.6, 142.4, 132.4, 131.8, 128.6, 128.5, 128.4, 127.8, 125.9, 123.1, 120.5, 95.7, 86.2, 68.2, 60.9, 14.5, 0.01. HRMS (TOF MS ESI<sup>+</sup>) calculated for C<sub>22</sub>H<sub>24</sub>N<sub>2</sub>NaO<sub>3</sub>Si<sup>+</sup> [M+Na]<sup>+</sup>: 415.1448, found 415.1454.

**Ethyl 3-acetoxy-2-diazo-3-(2-(phenylethynyl)phenyl)propanoate.**

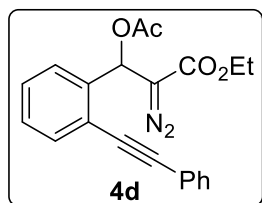

631.0 mg, 87% yield. <sup>1</sup>H NMR (400 MHz, CDCl<sub>3</sub>) (δ, ppm) 7.63 – 7.51 (comp, 3H), 7.49 – 7.44 (m, 1H), 7.41 – 7.29 (comp, 5H), 7.21 (s, 1H), 4.26 – 4.08 (m, 2H), 2.17 (s, 3H), 1.17 (t, *J* = 7.1 Hz, 3H); <sup>13</sup>C NMR (100 MHz, CDCl<sub>3</sub>) (δ, ppm) 169.6, 164.7, 138.1, 132.7, 131.8, 128.7, 128.5, 128.4, 128.3, 125.4, 122.8, 121.2, 96.2, 85.8, 70.0, 61.2, 21.0, 14.3. HRMS (TOF MS ESI<sup>+</sup>) calculated for C<sub>21</sub>H<sub>18</sub>N<sub>2</sub>NaO<sub>4</sub><sup>+</sup> [M+Na]<sup>+</sup>: 385.1159, found 385.1169.

## 2-Diazo-3-ethoxy-3-oxo-1-(2-(phenylethynyl)phenyl)propyl 4-methoxybenzoate.

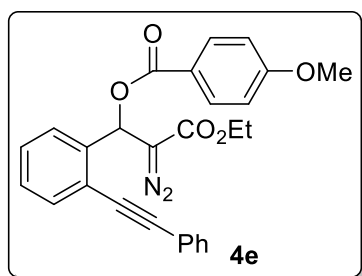

818.0 mg, 90% yield. <sup>1</sup>H NMR (400 MHz, CDCl<sub>3</sub>) (δ, ppm) 8.18 – 8.07 (comp, 2H), 7.67 – 7.52 (comp, 4H), 7.43 (s, 1H), 7.40 – 7.29 (comp, 5H), 7.02 – 6.90 (comp, 2H), 4.25 – 4.09 (m, 2H), 3.85 (s, 3H), 1.17 (t, *J* = 7.1 Hz, 3H); <sup>13</sup>C NMR (100 MHz, CDCl<sub>3</sub>) (δ, ppm) 171.2, 165.0, 163.8, 138.5, 132.8, 132.0, 131.9, 128.7, 128.5, 128.4, 128.3, 125.6, 122.9, 122.2, 121.2, 113.8, 96.2, 86.0, 70.4, 61.2, 55.5, 14.2. HRMS (TOF MS ESI<sup>+</sup>) calculated for C<sub>27</sub>H<sub>22</sub>N<sub>2</sub>NaO<sub>5</sub><sup>+</sup> [M+Na]<sup>+</sup>: 477.1426, found 477.1432.

### The preparation of diazo compound 4f, related to Scheme 1.

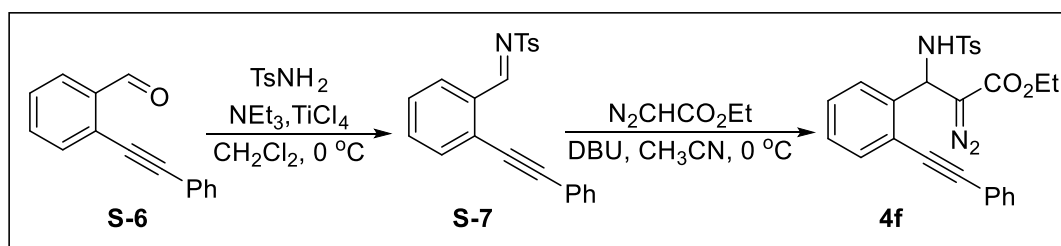

**Synthesis of 4f:** To a solution of 2-alkynylbenzaldehyde **S-6** (412.5 mg, 2.0 mmol), arylsulfonamide (342.5mg, 2.0 mmol) and triethylamine (506.0 mg, 5.0 mmol) in dry CH<sub>2</sub>Cl<sub>2</sub> (10.0 mL), was added titanium tetrachloride (455.2 mg, 2.4 mmol) at 0 °C under argon atmosphere. The reaction mixture was stirred under these conditions for 12 h, and then quenched with brine. The aqueous phase was extracted with CH<sub>2</sub>Cl<sub>2</sub> (10.0 mL X 2), and the combined organic layers were dried over anhydrous Na<sub>2</sub>SO<sub>4</sub> and concentrated in vacuo after filtration, and the resulting residues was purified by recrystallization (solvents: CH<sub>2</sub>Cl<sub>2</sub>/petroleum ether = 5 : 1) to afford 432.0 mg of **S-7** in 60% yield (based on **S-6**).

To a solution of ethyl diazoacetate (0.14 g, 1.2 mmol) in anhydrous CH<sub>3</sub>CN (1.0 mL), was added a solution of 1,8-diazabicyclo[5.4.0]undec-7-ene (DBU, 0.15 g, 1.0 mmol) in anhydrous CH<sub>3</sub>CN (1.0 mL) and **S-7** (0.36 g, 1.0 mmol) in anhydrous CH<sub>3</sub>CN (1.0 mL) in sequence at 0 °C under nitrogen atmosphere. After the mixture was stirred at room temperature for 15 h, the reaction was quenched with saturated aqueous NaHCO<sub>3</sub> and extracted with CH<sub>2</sub>Cl<sub>2</sub> (2 X 5.0 mL). Then the combined organic phase was washed with brine and dried over Na<sub>2</sub>SO<sub>4</sub>. The solvent was removed in vacuo after filtration, and the precipitated solid was washed with petroleum ether (6.0 mL X 2). Then the solid was dried under vacuum to give the corresponding diazoacetate **4f**.

(407.0 mg, 86% yield based on **S-7**) without further purification.  $^1\text{H}$  NMR (400 MHz,  $\text{CDCl}_3$ ) ( $\delta$ , ppm) 7.82 – 7.79 (comp, 2H), 7.71 – 7.69 (m, 1H), 7.53 – 7.45 (comp, 3H), 7.37 – 7.35 (comp, 2H), 7.30 – 7.27 (comp, 2H), 7.25 – 7.22 (m, 1H), 7.19 – 7.14 (comp, 2H), 6.00 (d,  $J = 5.6$  Hz, 1H), 5.84 (d,  $J = 7.6$  Hz, 1H), 4.05 – 3.98 (m, 2H), 2.32 (s, 3H), 1.34 – 1.31 (m, 3H);  $^{13}\text{C}$  NMR (100 MHz,  $\text{CDCl}_3$ ) ( $\delta$ , ppm) 165.4, 143.6, 139.6, 137.0, 132.9, 131.8, 129.8, 129.7, 128.8, 128.5, 128.1, 127.3, 127.0, 126.5, 122.0, 95.9, 86.4, 61.2, 52.6, 21.6, 14.3. HRMS (TOF MS  $\text{Cl}^+$ ) calculated for  $\text{C}_{26}\text{H}_{23}\text{N}_3\text{NaO}_4\text{S}^+$  [ $\text{M}+\text{Na}$ ] $^+$ : 496.1301, found 496.1311.

### The preparation of diazo compounds **14**, related to Scheme 1.

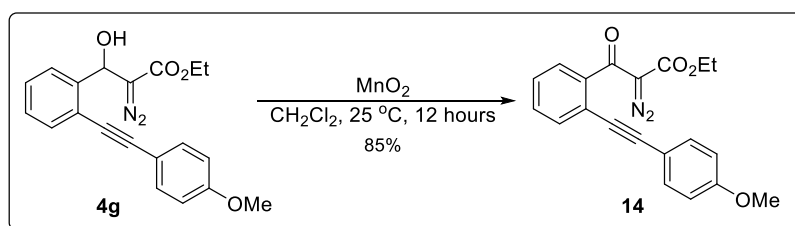

To a 50-mL oven-dried flask containing a magnetic stirring bar, **4g** (2.38 g, 6.8 mmol, prepared according to the above method for **4a**) in  $\text{CH}_2\text{Cl}_2$  (20 mL) was added  $\text{MnO}_2$  (8.88 g, 102.0 mmol) at  $25\text{ }^\circ\text{C}$ , and the reaction mixture was stirred under this condition for 12 hours. After the reaction was finished, the mixture was filtered through a short pad of silica, then the solvent was evaporated under reduced pressure and the residue was purified by flash column chromatography on silica gel (ethyl acetate/petroleum ether = 1/10) to give pure diazoacetate **14** (2.0 g, 85% yield based on **4g**).  $^1\text{H}$  NMR (400 MHz,  $\text{CDCl}_3$ ) ( $\delta$ , ppm) 7.53-7.51 (m, 1H), 8.45-8.35 (comp, 5H), 6.89-6.85 (m, 2H), 4.15 (q,  $J = 7.1$  Hz, 2H), 3.80 (s, 3H), 1.09 (t,  $J = 7.1$  Hz, 3H);  $^{13}\text{C}$  NMR (100 MHz,  $\text{CDCl}_3$ ) ( $\delta$ , ppm) 187.4, 161.1, 160.0, 140.4, 133.1, 131.9, 130.5, 127.9, 127.2, 121.5, 114.8, 114.1, 94.3, 85.5, 61.7, 55.3, 14.0. HRMS (TOF MS  $\text{ESI}^+$ ) calculated for  $\text{C}_{20}\text{H}_{17}\text{N}_2\text{O}_4^+$  [ $\text{M}+\text{H}$ ] $^+$ : 349.1183, found 349.1192.



## General Procedure for the Preparation of Au(I)-Catalysts, related to Table S1.

(Me<sub>2</sub>S)AuCl (294.5 mg, 1.0 equiv) was added to a solution of the corresponding phosphine (1.0 equiv) in CH<sub>2</sub>Cl<sub>2</sub> (2.0 mL) under argon at 25 °C and the solution was left stirring for 6 hours. After TLC indicated complete consumption of the starting material, the reaction solution was concentrated under reduced pressure to yield the desired Au(I) complexes (Mauleón et al., 2009; Gorin et al., 2005; Hashmi et al., 2014).

### Chloro(triphenyl phosphite)gold(I) (L1AuCl)

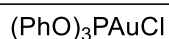

<sup>1</sup>H NMR (400 MHz, CDCl<sub>3</sub>) (δ, ppm) 7.45 – 7.37 (comp, 6H), 7.33 – 7.27 (m, 3H), 7.25 – 7.15 (comp, 6H); <sup>13</sup>C NMR (100 MHz, CDCl<sub>3</sub>) (δ, ppm) 149.49 (d, *J* = 4.5 Hz), 130.58 (d, *J* = 1.2 Hz), 126.78 (d, *J* = 1.8 Hz), 121.24 (d, *J* = 5.7 Hz); <sup>31</sup>P NMR (162 MHz, CDCl<sub>3</sub>) (δ, ppm) 110.49.

### Chloro[tris(2,4-di-tert-butylphenyl) phosphite]gold(I) (L2AuCl)

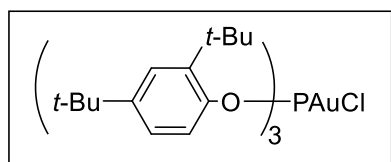

<sup>1</sup>H NMR (400 MHz, CDCl<sub>3</sub>) (δ, ppm) 7.59 – 7.34 (comp, 6H), 7.19 – 7.03 (m, 3H), 1.45 (s, 27H), 1.30 (s, 27H); <sup>13</sup>C NMR (100 MHz, CDCl<sub>3</sub>) (δ, ppm) 148.27 (s), 147.39 (d, *J* = 5.9 Hz), 139.26 (d, *J* = 6.9 Hz), 124.89 (d, *J* = 121.3 Hz), 119.34 (d, *J* = 8.9 Hz), 35.00 (d, *J* = 43.1 Hz), 31.10 (d, *J* = 83.2 Hz). <sup>31</sup>P NMR (162 MHz, CDCl<sub>3</sub>) (δ, ppm) 101.26.

### Chloro(triphenylphosphine)gold(I) (L3AuCl)

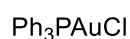

<sup>1</sup>H NMR (400 MHz, CDCl<sub>3</sub>) (δ, ppm) 7.63 – 7.39 (comp, 15H); <sup>13</sup>C NMR (150 MHz, CDCl<sub>3</sub>) (δ, ppm) 134.25 (d, *J* = 13.7 Hz), 132.12 (d, *J* = 1.7 Hz), 129.36 (d, *J* = 11.9 Hz), 128.81 (d, *J* = 62.4 Hz); <sup>31</sup>P NMR (162 MHz, CDCl<sub>3</sub>) (δ, ppm) 33.77.

### Chloro(tri-*o*-tolylphosphine)gold(I) (L4AuCl)

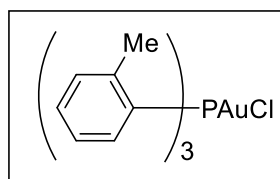

<sup>1</sup>H NMR (400 MHz, CDCl<sub>3</sub>) (δ, ppm) 7.54 – 7.40 (m, 3H), 7.42 – 7.29 (m, 3H), 7.20 (t, *J* = 7.6 Hz, 3H), 7.05 – 6.77 (m, 3H), 2.68 (s, 9H); <sup>13</sup>C NMR (100 MHz, CDCl<sub>3</sub>) δ

143.09 (d,  $J = 11.8$  Hz), 133.65 (d,  $J = 9.7$  Hz), 132.57 (d,  $J = 9.1$  Hz), 132.12 (d,  $J = 2.4$  Hz), 126.85 (d,  $J = 10.4$  Hz), 125.17 (d,  $J = 61.1$  Hz), 23.43 (d,  $J = 11.2$  Hz);  $^{31}\text{P}$  NMR (162 MHz,  $\text{CDCl}_3$ ) ( $\delta$ , ppm) 8.85.

**Chloro[tris(4-(trifluoromethyl)phenyl)phosphine]gold(I) (L5AuCl)**

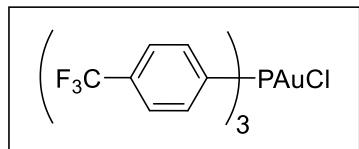

$^1\text{H}$  NMR (600 MHz,  $\text{CDCl}_3$ ) ( $\delta$ , ppm) 7.85 – 7.77 (m, 6H), 7.74 – 7.59 (m, 6H);  $^{13}\text{C}$  NMR (150MHz;  $\text{CDCl}_3$ ) ( $\delta$ , ppm) 134.8 (qd,  $J = 33$ , 2.7 Hz, Ar-C( $\text{CF}_3$ )), 134.7 (d,  $J = 14.6$  Hz, ArCH), 131.8 (d,  $J = 60.6$  Hz, Ar-CP), 126.7 (dq,  $J = 12.2$ , 3.5 Hz, Ar-CH), 123.2 (d,  $J = 271.1$  Hz,  $\text{CF}_3$ );  $^{19}\text{F}$  NMR (564 MHz;  $\text{CDCl}_3$ ) ( $\delta$ , ppm): -63.4 (m);  $^{31}\text{P}$  NMR (162 MHz;  $\text{CDCl}_3$ ) ( $\delta$ , ppm) 33.6.

**Chloro[tris(4-methoxyphenyl)phosphine]gold(I) (L6AuCl)**

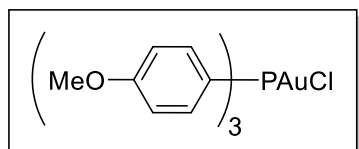

$^1\text{H}$  NMR (400 MHz,  $\text{CDCl}_3$ ) ( $\delta$ , ppm) 7.52 – 7.31 (m, 6H), 7.01 – 6.85 (m, 6H), 3.82 (s, 9H);  $^{13}\text{C}$  NMR (150 MHz,  $\text{cdcl}_3$ ) ( $\delta$ , ppm) 162.42 (s), 135.61 (d,  $J = 15.3$  Hz), 120.41 (d,  $J = 68.4$  Hz), 114.83 (d,  $J = 13.0$  Hz), 55.55 (s);  $^{31}\text{P}$  NMR (162 MHz,  $\text{CDCl}_3$ ) ( $\delta$ , ppm) 29.77.

**Chloro[(1,1'-biphenyl)-2-yl]diphenylphosphine]gold(I) (L7AuCl)**

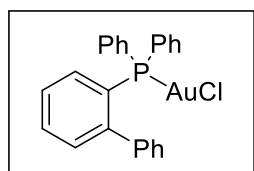

$^1\text{H}$  NMR (400 MHz,  $\text{CDCl}_3$ ) ( $\delta$ , ppm) 7.65 – 7.30 (comp, 14H), 7.28 – 7.24 (m, 2H), 7.10 – 6.90 (comp, 3H);  $^{13}\text{C}$  NMR (100 MHz,  $\text{CDCl}_3$ ) ( $\delta$ , ppm) 148.22 (d,  $J = 15.0$  Hz), 140.06 (d,  $J = 6.7$  Hz), 134.58 (d,  $J = 14.0$  Hz), 133.79 (d,  $J = 6.7$  Hz), 132.12 (d,  $J = 8.2$  Hz), 131.88 (d,  $J = 2.3$  Hz), 131.53 (d,  $J = 2.2$  Hz), 129.94 (d,  $J = 62.1$  Hz), 129.82, 129.26 (d,  $J = 12.0$  Hz), 128.58, 128.54, 127.66 (d,  $J = 8.9$  Hz), 127.658 (d,  $J = 61.5$  Hz);  $^{31}\text{P}$  NMR (162 MHz,  $\text{CDCl}_3$ ) ( $\delta$ , ppm) 60.51.

**dppm(AuCl) $_2$  (L8(AuCl) $_2$ )**

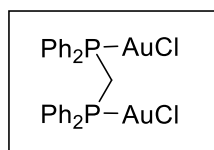

$^1\text{H}$  NMR (600 MHz, DMSO- $d_6$ ) ( $\delta$ , ppm) 7.80 – 7.73 (m, 8H), 7.51 (t,  $J = 7.4$  Hz, 4H), 7.47 – 7.40 (m, 8H), 4.67 (t,  $J = 12.8$  Hz, 2H);  $^{13}\text{C}$  NMR (150 MHz, DMSO- $d_6$ ) ( $\delta$ , ppm) 133.36 (t,  $J = 7.0$  Hz), 132.16 (s), 129.16 (t,  $J = 5.9$  Hz), 128.76 (d,  $J = 33.3$  Hz), 24.55 (t,  $J = 33.5$  Hz);  $^{31}\text{P}$  NMR (162 MHz,  $\text{CDCl}_3$ )  $\delta$  24.61.

### Chloro(methyldiphenylphosphine)gold(I) (**L9**AuCl)

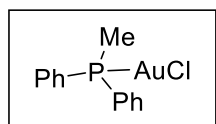

$^1\text{H}$  NMR (600 MHz,  $\text{CDCl}_3$ ) ( $\delta$ , ppm) 7.66 – 7.58 (m, 4H), 7.55 – 7.48 (m, 2H), 7.48 – 7.44 (m, 4H), 2.13 (d,  $J = 10.4$  Hz, 3H);  $^{13}\text{C}$  NMR (150 MHz,  $\text{CDCl}_3$ ) ( $\delta$ , ppm) 132.80 (d,  $J = 13.4$  Hz), 132.09 (d,  $J = 2.6$  Hz), 130.50 (d,  $J = 62.3$  Hz), 129.41 (d,  $J = 11.7$  Hz), 14.90 (d,  $J = 39.9$  Hz);  $^{31}\text{P}$  NMR (162 MHz,  $\text{CDCl}_3$ ) ( $\delta$ , ppm) 17.44.

### 1,1'-Bis(di-*tert*-butylphosphino)ferrocene-(AuCl) $_2$ (**L10**(AuCl) $_2$ )

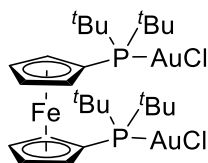

$^1\text{H}$  NMR (600 MHz,  $\text{CDCl}_3$ ) ( $\delta$ , ppm) 4.84 (s, 4H), 4.53 (d,  $J = 1.6$  Hz, 4H), 1.39 (d,  $J = 15.5$  Hz, 36H);  $^{13}\text{C}$  NMR (150 MHz,  $\text{CDCl}_3$ ) ( $\delta$ , ppm) 75.37 (d,  $J = 7.0$  Hz), 74.69 (d,  $J = 9.5$  Hz), 72.51 (d,  $J = 49.4$  Hz), 37.20 (d,  $J = 28.4$  Hz), 30.62 (d,  $J = 5.1$  Hz);  $^{31}\text{P}$  NMR (162 MHz,  $\text{CDCl}_3$ ) ( $\delta$ , ppm) 68.92.

### Chloro[(1,1'-biphenyl)-2-yl]dicyclohexylphosphine]gold(I) (**L11**AuCl)

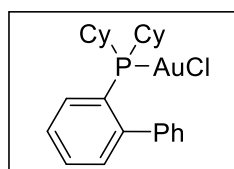

$^1\text{H}$  NMR (400 MHz,  $\text{CDCl}_3$ ) ( $\delta$ , ppm) 7.81 – 7.65 (m, 1H), 7.64 – 7.37 (m, 5H), 7.35 – 7.27 (m, 1H), 7.23 – 7.07 (m, 2H), 2.17 – 1.90 (m, 4H), 1.87 – 1.71 (m, 4H), 1.68 – 1.55 (m, 4H), 1.51 – 1.39 (m, 2H), 1.35 – 1.11 (m, 8H);  $^{13}\text{C}$  NMR (150 MHz,  $\text{CDCl}_3$ ) ( $\delta$ , ppm) 148.97 (d,  $J = 10.5$  Hz), 141.45 (d,  $J = 5.2$  Hz), 134.32 (d,  $J = 7.3$  Hz), 132.55 (d,  $J = 7.4$  Hz), 130.82 (s), 129.02 (d,  $J = 94.3$  Hz), 128.41 (s), 127.57 (d,  $J = 8.9$  Hz), 124.91 (d,  $J = 51.6$  Hz), 36.66 (d,  $J = 33.6$  Hz), 31.26 (d,  $J = 3.7$  Hz), 29.51 (s), 26.563 (s), 26.556 (d,  $J = 26.0$  Hz), 25.69 (s);  $^{31}\text{P}$  NMR (162 MHz,  $\text{CDCl}_3$ ) ( $\delta$ , ppm) 44.51.

**Chloro[(1,1'-biphenyl)-2-yl-di-*tert*-butylphosphine]gold(I) (L12AuCl)**

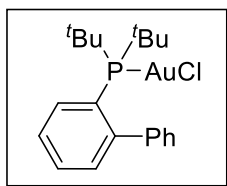

$^1\text{H}$  NMR (400 MHz,  $\text{CDCl}_3$ ) ( $\delta$ , ppm) 7.89 – 7.82 (m, 1H), 7.59 – 7.54 (m, 1H), 7.54 – 7.46 (m, 2H), 7.45 – 7.39 (m, 2H), 7.33 – 7.28 (m, 1H), 7.16 – 7.10 (m, 2H), 1.41 (d,  $J = 15.6$  Hz, 18H);  $^{13}\text{C}$  NMR (100 MHz,  $\text{CDCl}_3$ ) ( $\delta$ , ppm) 150.30 (d,  $J = 13.5$  Hz), 142.25 (d,  $J = 6.5$  Hz), 133.62 (d,  $J = 2.7$  Hz), 133.37 (d,  $J = 7.4$  Hz), 130.68 (d,  $J = 2.3$  Hz), 129.07 (d,  $J = 52.4$  Hz), 128.35 (s), 126.84 (d,  $J = 6.7$  Hz), 126.21 (d,  $J = 45.5$  Hz), 37.91 (d,  $J = 25.9$  Hz), 31.00 (d,  $J = 6.7$  Hz);  $^{31}\text{P}$  NMR (162 MHz,  $\text{CDCl}_3$ ) ( $\delta$ , ppm) 26.74.

**Chloro[4-(di-*tert*-butylphosphaneyl)-*N,N*-dimethylaniline]gold(I) (L13AuCl)**

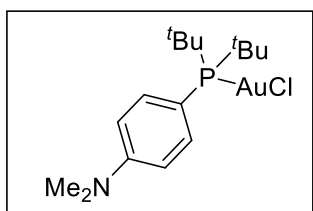

$^1\text{H}$  NMR (600 MHz,  $\text{CDCl}_3$ ) ( $\delta$ , ppm) 7.77 – 7.76 (m, 2H), 6.70 (d,  $J = 8.0$  Hz, 2H), 3.02 (s, 6H), 1.37 (d,  $J = 15.4$  Hz, 18H);  $^{13}\text{C}$  NMR (150 MHz,  $\text{CDCl}_3$ ) ( $\delta$ , ppm) 152.26 (s), 138.29 (s), 111.83 (s), 111.44 (d,  $J = 11.5$  Hz), 40.06 (s), 36.64 (d,  $J = 28.0$  Hz), 30.37 (d,  $J = 5.9$  Hz);  $^{31}\text{P}$  NMR (162 MHz,  $\text{CDCl}_3$ ) ( $\delta$ , ppm) 76.69.

**Chloro[di-*tert*-butyl(phenyl)phosphane]gold(I) (L14AuCl)**

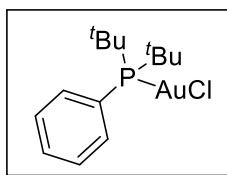

$^1\text{H}$  NMR (400 MHz,  $\text{CDCl}_3$ ) ( $\delta$ , ppm) 8.12 – 7.82 (m, 2H), 7.62 – 7.51 (m, 1H), 7.50 – 7.37 (m, 2H), 1.40 (d,  $J = 15.6$  Hz, 18H);  $^{13}\text{C}$  NMR (100 MHz,  $\text{CDCl}_3$ ) ( $\delta$ , ppm) 136.37 (s), 131.94 (d,  $J = 2.3$  Hz), 128.59 (d,  $J = 10.7$  Hz), 127.67 (d,  $J = 47.6$  Hz), 36.43 (d,  $J = 26.2$  Hz), 30.22 (d,  $J = 5.9$  Hz);  $^{31}\text{P}$  NMR (162 MHz,  $\text{CDCl}_3$ ) ( $\delta$ , ppm) 79.65.

**Chloro[1-(di-*tert*-butylphosphaneyl)-2-phenyl-1*H*-pyrrole]gold(I) (L15AuCl)**

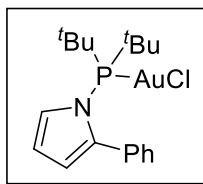

$^1\text{H}$  NMR (400 MHz,  $\text{CDCl}_3$ ) ( $\delta$ , ppm) 7.62 (t,  $J = 7.5$  Hz, 1H), 7.56 – 7.41 (m, 2H), 7.24 – 7.10 (m, 2H), 7.08 – 6.97 (m, 1H), 6.87 (d,  $J = 3.9$  Hz, 1H), 6.49 – 6.31 (m, 1H), 1.35 (d,  $J = 16.1$  Hz, 18H);  $^{13}\text{C}$  NMR (150 MHz,  $\text{CDCl}_3$ ) ( $\delta$ , ppm) 140.22 (s), 130.66 (d,  $J = 3.8$  Hz), 129.87 (s), 129.20 (d,  $J = 173.4$  Hz), 120.38 (d,  $J = 5.5$  Hz), 118.79 (d,  $J = 64.9$  Hz), 109.25 (d,  $J = 7.4$  Hz), 37.91 (d,  $J = 31.0$  Hz), 30.22 (d,  $J = 6.5$  Hz);  $^{31}\text{P}$  NMR (162 MHz) ( $\delta$ , ppm) 46.64.

**Chloro[di-*tert*-butyl(1,1-diphenylprop-1-en-2-yl)phosphine]gold(I) (L16AuCl)**

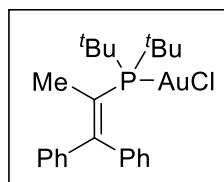

$^1\text{H}$  NMR (600 MHz,  $\text{CDCl}_3$ ) ( $\delta$ , ppm) 7.46 – 7.39 (m, 1H), 7.39 – 7.26 (comp, 4H), 7.24 – 7.20 (m, 1H), 7.17 – 7.00 (comp, 4H), 2.07 (d,  $J = 7.5$  Hz, 3H), 1.51 (d,  $J = 15.3$  Hz, 18H);  $^{13}\text{C}$  NMR (150 MHz,  $\text{CDCl}_3$ ) ( $\delta$ , ppm) 162.32 (d,  $J = 13.9$  Hz), 143.59 (d,  $J = 11.9$  Hz), 142.49 (d,  $J = 9.9$  Hz), 129.22 (d,  $J = 46.0$  Hz), 127.73 (d,  $J = 100.5$  Hz), 127.42 (d,  $J = 177.3$  Hz), 123.27 (d,  $J = 38.8$  Hz), 37.66 (d,  $J = 25.7$  Hz), 31.46 (d,  $J = 6.6$  Hz), 22.01 (d,  $J = 2.9$  Hz);  $^{31}\text{P}$  NMR (162 MHz,  $\text{CDCl}_3$ ) ( $\delta$ , ppm) 66.93.

**Chloro{di-*tert*-butyl(2'-methyl-[1,1'-biphenyl]-2-yl)phosphine}gold(I) (L17AuCl)**

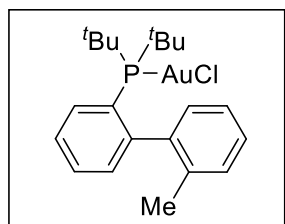

$^1\text{H}$  NMR (400 MHz,  $\text{CDCl}_3$ ) ( $\delta$ , ppm) 8.01 – 7.79 (m, 1H), 7.62 – 7.40 (m, 3H), 7.37 – 7.28 (m, 1H), 7.27 – 7.17 (m, 2H), 7.07 – 6.76 (m, 1H), 2.03 (s, 3H), 1.43 (dd,  $J = 15.5, 9.7$  Hz, 18H);  $^{13}\text{C}$  NMR (150 MHz,  $\text{CDCl}_3$ ) ( $\delta$ , ppm) 149.68 (d,  $J = 13.8$  Hz), 141.28 (d,  $J = 6.3$  Hz), 135.50 (s), 133.95 (d,  $J = 2.2$  Hz), 133.41 (d,  $J = 7.6$  Hz), 131.31 (s), 130.99 (s), 130.24 (s), 128.70 (s), 127.03 (s), 126.74 (d,  $J = 6.6$  Hz), 125.43 (s), 38.01 (dd,  $J = 26.0, 14.0$  Hz), 31.18 (dd,  $J = 122.0, 6.5$  Hz), 20.81 (s);  $^{31}\text{P}$  NMR (162 MHz,  $\text{CDCl}_3$ ) ( $\delta$ , ppm) 60.40.

**Chloro[2'-(di-*tert*-butylphosphaneyl)-*N,N*-dimethyl-[1,1'-biphenyl]-2-amine]gold(I) (L18AuCl)**

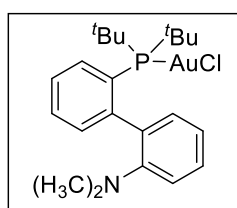

$^1\text{H}$  NMR (600 MHz,  $\text{CDCl}_3$ ) ( $\delta$ , ppm) 7.89 – 7.82 (m, 1H), 7.59 – 7.49 (comp, 2H), 7.48 – 7.42 (m, 1H), 7.37 – 7.31 (m, 1H), 7.13 (d,  $J = 8.1$  Hz, 1H), 7.07 (t,  $J = 7.3$  Hz, 1H), 6.96 (d,  $J = 7.3$  Hz, 1H), 2.46 (s, 6H), 1.53 (d,  $J = 15.6$  Hz, 9H), 1.25 (d,  $J = 15.3$  Hz, 9H);  $^{13}\text{C}$  NMR (150 MHz,  $\text{CDCl}_3$ ) ( $\delta$ , ppm) 151.23 (s), 149.24 (d,  $J = 13.3$  Hz), 136.37 (d,  $J = 5.5$  Hz), 134.52 (d,  $J = 7.8$  Hz), 133.94 (s), 131.13 (d,  $J = 76.3$  Hz), 129.43 (s), 127.10 (d,  $J = 46.2$  Hz), 126.37 (d,  $J = 5.9$  Hz), 122.44 (s), 121.18 (s), 44.05 (s), 38.14 (d,  $J = 26.1$  Hz), 37.65 (d,  $J = 25.8$  Hz), 31.70 (d,  $J = 6.8$  Hz), 30.34 (d,  $J = 6.3$  Hz);  $^{31}\text{P}$  NMR (162 MHz,  $\text{CDCl}_3$ ) ( $\delta$ , ppm) 62.01.

**Chloro[(1,1'-binaphthalen)-2-yl]di-*tert*-butylphosphine]gold(I) (L19AuCl)**

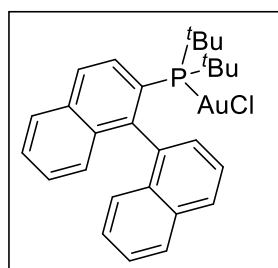

$^1\text{H}$  NMR (400 MHz,  $\text{CDCl}_3$ ) ( $\delta$ , ppm) 8.23 (d,  $J = 8.3$  Hz, 1H), 8.11 – 7.97 (comp, 3H), 7.93 (d,  $J = 8.1$  Hz, 1H), 7.62 – 7.51 (comp, 2H), 7.50 – 7.42 (m, 1H), 7.36 – 7.30 (m, 1H), 7.26 – 7.18 (comp, 2H), 7.03 – 6.86 (comp, 2H), 1.44 (dd,  $J = 15.5$ , 11.5 Hz, 18H);  $^{13}\text{C}$  NMR (101 MHz,  $\text{CDCl}_3$ ) ( $\delta$ , ppm) 147.90 (d,  $J = 13.2$  Hz), 136.26 (d,  $J = 7.9$  Hz), 134.69 (d,  $J = 9.0$  Hz), 134.13 (d,  $J = 1.9$  Hz), 133.56 (s), 129.44 (d,  $J = 13.0$  Hz), 128.87 (d,  $J = 3.3$  Hz), 128.65 (d,  $J = 1.0$  Hz), 127.44 (d,  $J = 7.1$  Hz), 124.98 (s), 38.16 (dd,  $J = 25.3$ , 22.9 Hz), 31.38 (dd,  $J = 89.8$ , 6.8 Hz);  $^{31}\text{P}$  NMR (162 MHz,  $\text{CDCl}_3$ ) ( $\delta$ , ppm) 62.51.

**Chloro{di-*tert*-butyl(2',4',6'-triisopropyl-[1,1'-biphenyl]-2-yl)phosphine}gold(I) (L20AuCl)**

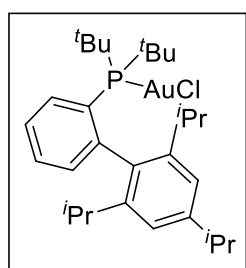

$^1\text{H}$  NMR (400 MHz,  $\text{CDCl}_3$ ) ( $\delta$ , ppm) 7.93 – 7.82 (m, 1H), 7.57 – 7.43 (comp, 2H), 7.36 – 7.28 (m, 1H), 7.06 (s, 2H), 2.98 (dt,  $J = 13.8$ , 6.9 Hz, 1H), 2.33 (dt,  $J = 13.4$ , 6.7 Hz, 2H), 1.41 (d,  $J = 15.4$  Hz, 18H), 1.37 (d,  $J = 6.9$  Hz, 6H), 1.28 (d,  $J = 6.8$  Hz, 6H), 0.91 (d,  $J = 6.6$  Hz, 6H);  $^{13}\text{C}$  NMR (101 MHz,  $\text{CDCl}_3$ ) ( $\delta$ , ppm) 150.21 (s), 148.65 (d,  $J = 14.3$  Hz), 145.77 (s), 135.61 (d,  $J = 5.6$  Hz), 135.03 (d,  $J = 8.0$  Hz), 134.53 (d,  $J = 3.1$  Hz), 130.29 (d,  $J = 2.3$  Hz), 128.43 (d,  $J = 43.1$  Hz), 126.48 (d,  $J = 7.0$  Hz), 121.94 (s), 38.43 (d,  $J = 26.4$  Hz), 34.31 (s), 31.39 (d,  $J = 6.5$  Hz), 30.94 (s), 26.29 (s), 24.46 (s), 23.11 (s);  $^{31}\text{P}$  NMR (162 MHz,  $\text{CDCl}_3$ ) ( $\delta$ , ppm) 59.17.

**Chloro{di-*tert*-butyl(2',4',6'-triisopropyl-3,4,5,6-tetramethyl-[1,1'-biphenyl]-2-yl)phosphine}gold(I) (L21AuCl)**

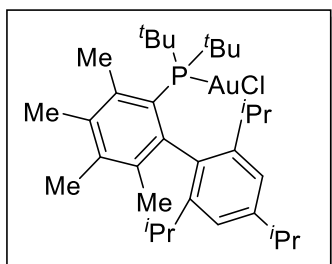

$^1\text{H}$  NMR (400 MHz,  $\text{CDCl}_3$ ) ( $\delta$ , ppm) 7.04 (s, 2H), 3.03 – 2.94 (m, 1H), 2.61 (s, 3H), 2.41 – 2.34 (m, 2H), 2.30 (s, 3H), 2.23 (s, 3H), 1.57 – 1.45 (comp, 21H), 1.38 (d,  $J = 6.9$  Hz, 6H), 1.29 (d,  $J = 6.8$  Hz, 6H), 0.85 (d,  $J = 6.6$  Hz, 6H);  $^{13}\text{C}$  NMR (100 MHz,  $\text{CDCl}_3$ ) ( $\delta$ , ppm) 150.38 (s), 146.31 (d,  $J = 20.4$  Hz), 145.88 (s), 140.34 (d,  $J = 2.5$  Hz), 138.17 (d,  $J = 3.4$  Hz), 137.78 (d,  $J = 1.4$  Hz), 137.69 (d,  $J = 2.7$  Hz), 135.66 (d,  $J = 7.1$  Hz), 128.32 (d,  $J = 35.6$  Hz), 122.68 (s), 41.98 (d,  $J = 20.5$  Hz), 34.36 (s), 33.58 (d,  $J = 8.3$  Hz), 30.80 (s), 28.12 (d,  $J = 1.6$  Hz), 25.31 (s), 25.17 (s), 24.76 (s), 22.33 (d,  $J = 2.7$  Hz), 17.65 (d,  $J = 47.4$  Hz);  $^{31}\text{P}$  NMR (162 MHz,  $\text{CDCl}_3$ ) ( $\delta$ , ppm) 77.67.

**Chloro[3-(di-*tert*-butylphosphaneyl)-1--phenyl-1*H*-indole]gold(I) (L22AuCl)**

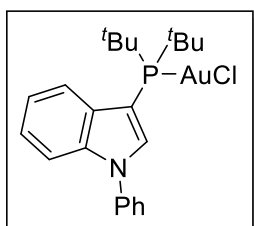

$^1\text{H}$  NMR (600 MHz,  $\text{CDCl}_3$ ) ( $\delta$ , ppm) 7.77 – 7.69 (comp, 2H), 7.63 – 7.57 (comp, 2H), 7.26 – 7.25 (m, 1H), 7.25 – 7.19 (comp, 4H), 6.90 – 6.85 (m, 1H), 1.44 (d,  $J = 16.3$  Hz, 18H);  $^{13}\text{C}$  NMR (150 MHz,  $\text{CDCl}_3$ ) ( $\delta$ , ppm) 141.65 (d,  $J = 4.7$  Hz), 137.83 (s), 130.42 (s), 130.24 (s), 130.04 (s), 126.52 (d,  $J = 7.6$  Hz), 126.15 (d,  $J = 58.0$  Hz), 124.65 (s), 121.34 (d,  $J = 34.8$  Hz), 113.56 (d,  $J = 4.6$  Hz), 111.98 (s), 38.08 (d,  $J = 29.4$  Hz), 30.37 (d,  $J = 6.5$  Hz);  $^{31}\text{P}$  NMR (162 MHz,  $\text{CDCl}_3$ ) ( $\delta$ , ppm) 48.86.

**Chloro[3-(di-*tert*-butylphosphaneyl)-1--phenyl-1*H*-indole]gold(I) (L23AuCl)**

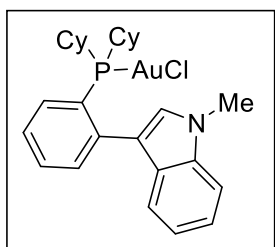

$^1\text{H}$  NMR (400 MHz,  $\text{CDCl}_3$ ) ( $\delta$ , ppm) 7.93 – 7.78 (m, 1H), 7.66 (d,  $J = 7.8$  Hz, 1H), 7.62 – 7.49 (m, 2H), 7.47 – 7.33 (comp, 2H), 7.34 – 7.26 (m, 1H), 7.24 – 7.13 (m, 1H), 6.68 – 6.20 (m, 1H), 3.50 (s, 3H), 2.50 – 2.19 (m, 1H), 2.02 – 1.88 (m, 2H), 1.88 –

1.49 (m, 10H), 1.41 – 1.09 (m, 9H).  $^{13}\text{C}$  NMR (100 MHz,  $\text{CDCl}_3$ ) ( $\delta$ , ppm) 139.33 (d,  $J = 9.9$  Hz), 137.49 (s), 137.41 (d,  $J = 5.6$  Hz), 135.14 (d,  $J = 9.1$  Hz), 134.05 (d,  $J = 7.0$  Hz), 130.88 (d,  $J = 2.2$  Hz), 128.90 (d,  $J = 9.0$  Hz), 127.54 (s), 122.46 (s), 120.72 (s), 120.37 (s), 110.24 (s), 104.97 (s), 37.02 (d,  $J = 32.9$  Hz), 35.82 (d,  $J = 33.9$  Hz), 31.82 (d,  $J = 5.6$  Hz), 30.96 (s), 30.25 (d,  $J = 2.0$  Hz), 29.75 (d,  $J = 2.9$  Hz), 26.73 (dd,  $J = 12.4, 7.5$  Hz), 26.45 (dd,  $J = 20.7, 12.9$  Hz), 25.68 (s).  $^{31}\text{P}$  NMR (162 MHz,  $\text{CDCl}_3$ ) ( $\delta$ , ppm) 46.55.

**Chloro[*S*-dimethylene-[7,7'-(1,1'-spiroindan)]-phenylphospholine]gold(I)**  
(L24AuCl)

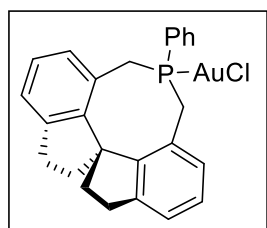

$^1\text{H}$  NMR (400 MHz,  $\text{CDCl}_3$ ) ( $\delta$ , ppm) 7.53 – 7.45 (m, 1H), 7.38 – 7.27 (comp, 4H), 7.26 – 7.22 (m, 1H), 7.21 – 7.11 (comp, 3H), 6.85 (t,  $J = 7.5$  Hz, 1H), 5.94 (d,  $J = 7.6$  Hz, 1H), 3.76 (dd,  $J = 16.0, 12.9$  Hz, 1H), 3.50 (dd,  $J = 14.5, 8.6$  Hz, 1H), 3.12 – 2.98 (comp, 3H), 2.98 – 2.84 (comp, 3H), 2.32 (dd,  $J = 12.4, 6.4$  Hz, 1H), 2.24 (dd,  $J = 12.4, 6.5$  Hz, 1H), 2.06 – 1.94 (m, 1H), 1.94 – 1.83 (m, 1H);  $^{13}\text{C}$  NMR (151 MHz,  $\text{CDCl}_3$ ) ( $\delta$ , ppm) 147.94 (d,  $J = 4.6$  Hz), 147.71 (d,  $J = 5.3$  Hz), 143.98 (d,  $J = 3.6$  Hz), 143.80 (d,  $J = 3.1$  Hz), 133.73 (d,  $J = 12.6$  Hz), 132.38 (d,  $J = 2.5$  Hz), 130.69 (d,  $J = 6.2$  Hz), 129.89 (d,  $J = 4.6$  Hz), 128.84 (d,  $J = 3.8$  Hz), 128.56 (d,  $J = 11.1$  Hz), 127.21 (d,  $J = 4.3$  Hz), 127.07 (d,  $J = 2.9$  Hz), 126.73 (s), 125.64 (d,  $J = 11.4$  Hz), 124.96 (d,  $J = 4.1$  Hz), 124.69 (d,  $J = 3.5$  Hz), 61.78 (d,  $J = 2.1$  Hz), 38.21 (d,  $J = 42.4$  Hz), 31.75 (d,  $J = 28.4$  Hz), 30.48 (d,  $J = 23.2$  Hz), 26.21 (d,  $J = 34.8$  Hz);  $^{31}\text{P}$  NMR (162 MHz,  $\text{CDCl}_3$ ) ( $\delta$ , ppm) 27.00.

**Chloro[di-*tert*-butyl(1-methyl-2,2-diphenylcyclopropyl)phosphine]gold(I)**  
(L25AuCl)

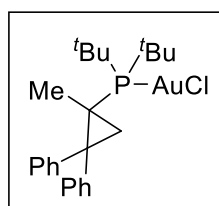

$^1\text{H}$  NMR (400 MHz,  $\text{CDCl}_3$ ) ( $\delta$ , ppm) 7.56 – 7.45 (m, 2H), 7.45 – 7.37 (m, 2H), 7.32 – 7.24 (m, 5H), 7.21 – 7.14 (m, 1H), 2.45 (dd,  $J = 15.3, 5.3$  Hz, 1H), 1.67 – 1.49 (m, 19H), 1.42 (d,  $J = 7.7$  Hz, 3H);  $^{13}\text{C}$  NMR (100 MHz,  $\text{CDCl}_3$ ) ( $\delta$ , ppm) 143.21 (s), 141.37 (d,  $J = 5.9$  Hz), 130.47 (s), 129.65 (d,  $J = 1.6$  Hz), 129.34 (s), 128.84 (s), 127.72 (s), 126.87 (s), 42.40 (s), 39.51 (dd,  $J = 309.9, 25.3$  Hz), 32.22 (dd,  $J = 97.0, 5.1$  Hz), 27.40 (s), 25.37 (d,  $J = 35.8$  Hz), 24.26 (s);  $^{31}\text{P}$  NMR (162 MHz,  $\text{CDCl}_3$ ) ( $\delta$ , ppm) 77.64.



**Chloro[tri-*tert*-butylphosphine]gold(I) (L26AuCl)**

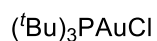

$^1\text{H}$  NMR (400 MHz,  $\text{CDCl}_3$ ) ( $\delta$ , ppm) 1.52 (d,  $J = 13.9$  Hz, 27H);  $^{13}\text{C}$  NMR (100 MHz,  $\text{CDCl}_3$ ) ( $\delta$ , ppm) 39.61 (d,  $J = 20.9$  Hz), 32.38 (d,  $J = 4.0$  Hz);  $^{31}\text{P}$  NMR (162 MHz,  $\text{CDCl}_3$ ) ( $\delta$ , ppm) 91.18.

**Chloro[di-*tert*-butyl(methyl)phosphine]gold(I) (L27AuCl)**

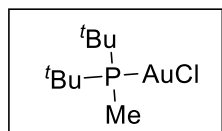

$^1\text{H}$  NMR (400 MHz,  $\text{CDCl}_3$ ) ( $\delta$ , ppm) 1.49 (d,  $J = 9.3$  Hz, 3H), 1.33 (d,  $J = 15.2$  Hz, 18H);  $^{13}\text{C}$  NMR (101 MHz,  $\text{CDCl}_3$ ) ( $\delta$ , ppm) 34.48 (d,  $J = 29.6$  Hz), 29.16 (d,  $J = 5.2$  Hz), 5.77 (d,  $J = 31.6$  Hz);  $^{31}\text{P}$  NMR (162 MHz,  $\text{CDCl}_3$ ) ( $\delta$ , ppm) 58.18.

**Chloro(tricyclohexylphosphine)gold(I) (L28AuCl)**

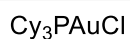

$^1\text{H}$  NMR (400 MHz,  $\text{CDCl}_3$ ) ( $\delta$ , ppm) 2.04 – 1.90 (m, 9H), 1.90 – 1.78 (m, 6H), 1.75 – 1.67 (m, 3H), 1.52 – 1.38 (m, 6H), 1.36 – 1.18 (m, 9H);  $^{13}\text{C}$  NMR (101 MHz,  $\text{CDCl}_3$ ) ( $\delta$ , ppm) 33.44 (d,  $J = 31.0$  Hz), 30.89 (s), 27.10 (d,  $J = 12.2$  Hz), 25.94 (d,  $J = 1.2$  Hz);  $^{31}\text{P}$  NMR (162 MHz,  $\text{CDCl}_3$ ) ( $\delta$ , ppm) 54.65.

**Chloro(trimethylphosphine)gold(I) (L29AuCl)**

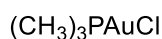

$^1\text{H}$  NMR (400 MHz,  $\text{CDCl}_3$ ) ( $\delta$ , ppm) 1.62 (d,  $J = 11.3$  Hz, 9H);  $^{13}\text{C}$  NMR (100 MHz,  $\text{CDCl}_3$ ) ( $\delta$ , ppm) 16.25 (d,  $J = 40.3$  Hz);  $^{31}\text{P}$  NMR (162 MHz,  $\text{CDCl}_3$ ) ( $\delta$ , ppm) -9.80.

### General Procedure for the Optimization of Ligands, related to Table S2.

The **LnAuCl** complex (0.01 mmol) and  $\text{AgSbF}_6$  (3.34mg, 0.01 mmol) were suspended in DCE (0.5 mL). The reaction was stirred at room temperature for 2.0 hours. The solvent was evaporated and the mixture dissolved in 0.5 mL of DCE. Then the mixture was filtered through a pad of Celite, which was added into a solution of **1a** (58mg, 0.2mmol) in DCE (0.5 mL) at 25 °C for 12.0 hours. Afterwards, 1,3,5-trimethoxybenzene (16.8 mg, 0.1mmol) was added into the reaction mixture, and yield determined by proton *NMR* using 1,3,5-trimethoxybenzene as the internal standard. E.g., “**L1**, 0%; 89%” is equal to “**L1AuCl**, 0% **2a**; 89% **3a**”.

## General Procedure for the Gold-Catalyzed Aromatization, related to Scheme1

### Method A

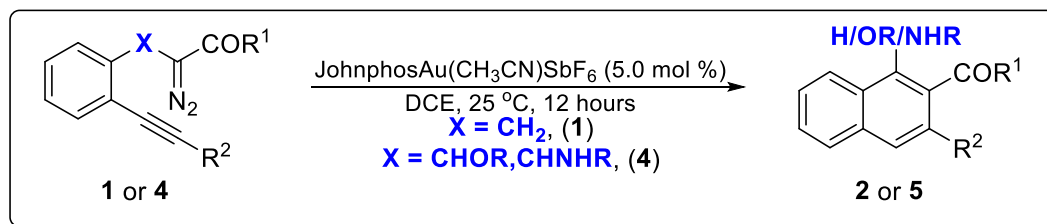

A solution of diazoacetate **1** or **4** (0.2 mmol) in 1,2-dichloroethane (2.0 mL) was added over 5 min to a 10-mL oven-dried flask containing a magnetic stirring bar, and  $\text{JohnphosAu(CH}_3\text{CN)SbF}_6$  (7.7 mg, 0.01 mmol, 5.0 mol %) in dry 1,2-dichloroethane (2.0 mL) using a syringe at room temperature under argon atmosphere. After the addition, the reaction mixture was stirred at 25 °C for 12 hours. Then, the solvent was removed under reduced pressure and the crude product was purified by column chromatography on a silica gel (solvents: ethyl acetate/petroleum ether = 1/10) to afford the pure naphthalene derivatives **2** or **5** in 62%-94% yields.

(The experimental procedure for the synthesis of **6** is same to that mentioned above in Method A, related to **Figure 2A**.)

### Method B

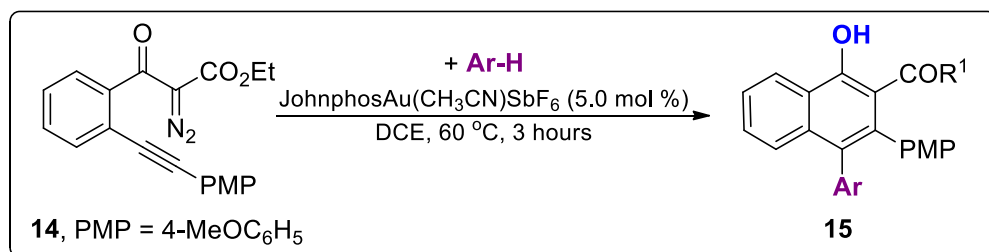

A solution of diazoacetate **14** (69.6 mg, 0.2 mmol) in dry 1,2-dichloroethane (2.0 mL) was added over 5 min to a 10-mL oven-dried flask containing a magnetic stirring bar,  $\text{JohnphosAu(CH}_3\text{CN)SbF}_6$  (7.7 mg, 0.01 mmol, 5.0 mol %), and nucleophiles (0.3 mmol, 1.5 equiv) in dry 1,2-dichloroethane (2.0 mL) using a syringe at room temperature under argon atmosphere. After the addition, the reaction mixture was stirred at 60 °C for 3 hours (performed for 12 h in the case of **15i**). Then, the solvent was removed under reduced pressure and the crude product was purified by column chromatography on a silica gel (solvents: ethyl acetate/petroleum ether = 1/10 to 1/5) to afford the pure products **15** in 53%-94% yields.

### Methyl 3-phenyl-2-naphthoate.

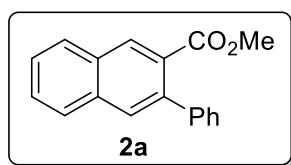

47.7 mg, 91% yield.  $^1\text{H}$  NMR (400 MHz,  $\text{CDCl}_3$ ) ( $\delta$ , ppm) 8.41 (s, 1H), 7.95 (d,  $J = 8.0$  Hz, 1H), 7.87 (d,  $J = 8.1$  Hz, 1H), 7.83 (s, 1H), 7.63 – 7.52 (comp, 2H), 7.48 – 7.35 (comp, 5H), 3.71 (s, 3H);  $^{13}\text{C}$  NMR (100 MHz,  $\text{CDCl}_3$ ) ( $\delta$ , ppm) 169.1, 141.6, 138.9, 134.5, 131.7, 131.1, 129.9, 129.2, 128.7, 128.6, 128.4, 128.2, 127.9, 127.2, 126.9, 52.2. HRMS (TOF MS  $\text{ESI}^+$ ) calculated for  $\text{C}_{18}\text{H}_{14}\text{NaO}_2^+$  [ $\text{M}+\text{Na}$ ] $^+$ : 285.0886, found 285.0881.

### Isopropyl 3-phenyl-2-naphthoate.

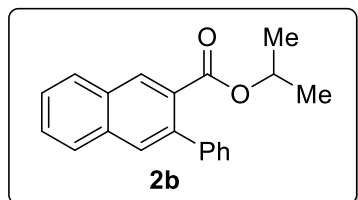

52.8 mg, 91% yield.  $^1\text{H}$  NMR (400 MHz,  $\text{CDCl}_3$ ) ( $\delta$ , ppm) 8.38 (s, 1H), 7.96 (d,  $J = 7.9$  Hz, 1H), 7.87 (d,  $J = 8.0$  Hz, 1H), 7.82 (s, 1H), 7.61 – 7.52 (comp, 2H), 7.44 – 7.34 (comp, 5H), 5.05 (dt,  $J = 12.5, 6.3$  Hz, 1H), 1.07 (d,  $J = 6.3$  Hz, 6H);  $^{13}\text{C}$  NMR (100 MHz,  $\text{CDCl}_3$ ) ( $\delta$ , ppm) 168.5, 141.7, 138.8, 134.3, 131.7, 130.7, 130.3, 129.7, 128.8, 128.6, 128.2, 128.1, 127.9, 127.1, 126.8, 68.8, 21.5. HRMS (TOF MS  $\text{CI}^+$ ) calculated for  $\text{C}_{20}\text{H}_{18}\text{NaO}_2^+$  [ $\text{M}+\text{Na}$ ] $^+$ : 313.1199, found 313.1215.

### *tert*-Butyl 3-phenyl-2-naphthoate.

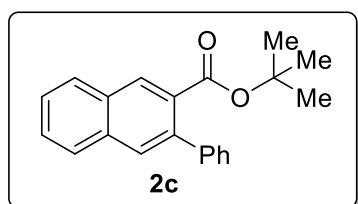

54.8 mg, 90% yield.  $^1\text{H}$  NMR (400 MHz,  $\text{CDCl}_3$ ) ( $\delta$ , ppm) 8.35 (s, 1H), 7.95 (d,  $J = 7.8$  Hz, 1H), 7.86 (d,  $J = 7.9$  Hz, 1H), 7.79 (s, 1H), 7.61 – 7.51 (m, 2H), 7.46 – 7.35 (m, 5H), 1.29 (s, 9H);  $^{13}\text{C}$  NMR (100 MHz,  $\text{CDCl}_3$ ) ( $\delta$ , ppm) 168.2, 142.2, 138.8, 134.2, 131.8, 131.5, 130.6, 129.6, 128.9, 128.6, 128.1, 128.0, 127.9, 127.0, 126.7, 81.5, 27.7. HRMS (TOF MS  $\text{ESI}^+$ ) calculated for  $\text{C}_{21}\text{H}_{20}\text{NaO}_2^+$  [ $\text{M}+\text{Na}$ ] $^+$ : 327.1356, found 327.1351.

### Benzyl 3-phenyl-2-naphthoate.

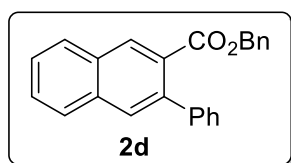

60.2 mg, 89% yield.  $^1\text{H}$  NMR (400 MHz,  $\text{CDCl}_3$ ) ( $\delta$ , ppm) 8.44 (s, 1H), 7.95 (d,  $J = 8.0$  Hz, 1H), 7.87 (d,  $J = 8.1$  Hz, 1H), 7.84 (s, 1H), 7.62 – 7.58 (m, 1H), 7.57 – 7.53 (m, 1H), 7.44 – 7.36 (comp, 5H), 7.33 – 7.28 (comp, 3H), 7.20 – 6.97 (comp, 2H), 5.17 (s, 2H);  $^{13}\text{C}$  NMR (100 MHz,  $\text{CDCl}_3$ ) ( $\delta$ , ppm) 168.7, 141.6, 138.8, 135.5, 134.5, 131.70, 131.65, 131.2, 129.9, 129.3, 128.71, 128.70, 128.5, 128.4, 128.3, 128.2, 127.9, 127.2, 126.8, 67.2. HRMS (TOF MS  $\text{ESI}^+$ ) calculated for  $\text{C}_{24}\text{H}_{18}\text{NaO}_2^+$   $[\text{M}+\text{Na}]^+$ : 361.1199, found 361.1194.

### Cinnamyl 3-phenyl-2-naphthoate.

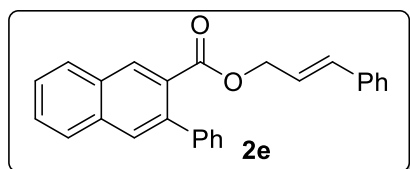

67.1 mg, 92% yield.  $^1\text{H}$  NMR (400 MHz,  $\text{CDCl}_3$ ) ( $\delta$ , ppm) 8.45 (s, 1H), 7.96 (d,  $J = 8.1$  Hz, 1H), 7.88 (d,  $J = 8.1$  Hz, 1H), 7.84 (s, 1H), 7.63 – 7.58 (m, 1H), 7.58 – 7.53 (m, 1H), 7.47 – 7.38 (comp, 4H), 7.37 – 7.32 (comp, 5H), 7.30 – 7.26 (m, 1H), 6.52 – 6.42 (m, 1H), 6.07 – 5.95 (m, 1H), 4.77 (dd,  $J = 6.4, 1.3$  Hz, 2H);  $^{13}\text{C}$  NMR (100 MHz,  $\text{CDCl}_3$ ) ( $\delta$ , ppm) 168.6, 141.7, 138.9, 136.4, 134.5, 134.2, 131.7, 131.2, 129.9, 129.4, 128.8, 128.74, 128.67, 128.4, 128.2, 128.1, 127.9, 127.2, 126.9, 126.7, 122.9, 65.7. HRMS (TOF MS  $\text{ESI}^+$ ) calculated for  $\text{C}_{26}\text{H}_{20}\text{NaO}_2^+$   $[\text{M}+\text{Na}]^+$ : 387.1356, found 387.1370.

### Methyl 3-(*p*-tolyl)-2-naphthoate.

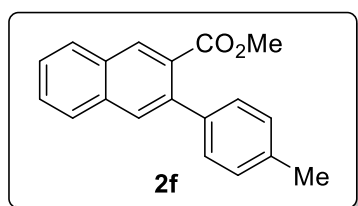

49.8 mg, 90% yield.  $^1\text{H}$  NMR (400 MHz,  $\text{CDCl}_3$ ) ( $\delta$ , ppm) 8.37 (s, 1H), 7.92 (d,  $J = 8.0$  Hz, 1H), 7.84 (d,  $J = 8.1$  Hz, 1H), 7.80 (s, 1H), 7.59 – 7.49 (comp, 2H), 7.32 – 7.28 (comp, 2H), 7.26 – 7.21 (comp, 2H), 3.72 (s, 3H), 2.41 (s, 3H);  $^{13}\text{C}$  NMR (100 MHz,  $\text{CDCl}_3$ ) ( $\delta$ , ppm) 169.2, 138.9, 138.6, 136.9, 134.5, 131.6, 131.0, 129.8, 129.2, 128.9, 128.6, 128.5, 128.3, 127.9, 126.7, 52.2, 21.3. HRMS (TOF MS  $\text{ESI}^+$ ) calculated for  $\text{C}_{19}\text{H}_{16}\text{NaO}_2^+$   $[\text{M}+\text{Na}]^+$ : 299.1043, found 299.1044.

### Methyl 3-(*m*-tolyl)-2-naphthoate.

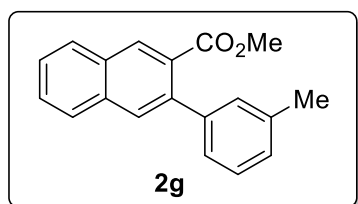

49.2 mg, 89% yield.  $^1\text{H}$  NMR (400 MHz,  $\text{CDCl}_3$ ) ( $\delta$ , ppm) 8.38 (s, 1H), 7.94 (d,  $J = 8.0$  Hz, 1H), 7.87 (d,  $J = 8.1$  Hz, 1H), 7.83 (s, 1H), 7.62 – 7.50 (comp, 2H), 7.37 – 7.29 (m, 1H), 7.28 – 7.23 (m, 1H), 7.23 – 7.15 (comp, 2H), 3.72 (s, 3H), 2.43 (s, 3H);  $^{13}\text{C}$  NMR (100 MHz,  $\text{CDCl}_3$ ) ( $\delta$ , ppm) 169.3, 141.5, 139.0, 137.8, 134.5, 131.7, 131.0, 129.8, 129.34, 129.28, 128.7, 128.3, 128.03, 128.01, 127.9, 126.8, 125.8, 52.2, 21.6. HRMS (TOF MS  $\text{ESI}^+$ ) calculated for  $\text{C}_{19}\text{H}_{16}\text{NaO}_2^+$   $[\text{M}+\text{Na}]^+$ : 299.1043, found 299.1049.

### Methyl 3-(*o*-tolyl)-2-naphthoate.

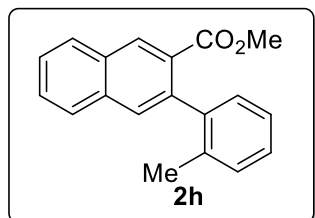

44.8 mg, 81% yield.  $^1\text{H}$  NMR (400 MHz,  $\text{CDCl}_3$ ) ( $\delta$ , ppm) 8.56 (s, 1H), 7.98 (d,  $J = 8.0$  Hz, 1H), 7.85 (d,  $J = 8.0$  Hz, 1H), 7.71 (s, 1H), 7.66 – 7.50 (comp, 2H), 7.35 – 7.23 (comp, 3H), 7.19 (d,  $J = 7.2$  Hz, 1H), 3.69 (s, 3H), 2.11 (s, 3H);  $^{13}\text{C}$  NMR (100 MHz,  $\text{CDCl}_3$ ) ( $\delta$ , ppm) 167.9, 141.7, 139.1, 135.8, 134.7, 131.7, 131.4, 130.0, 129.5, 129.0, 128.9, 128.7, 128.5, 127.8, 127.4, 126.8, 125.4, 52.1, 20.2. HRMS (TOF MS  $\text{ESI}^+$ ) calculated for  $\text{C}_{19}\text{H}_{16}\text{NaO}_2^+$   $[\text{M}+\text{Na}]^+$ : 299.1043, found 299.1042.

### Methyl 3-(4-methoxyphenyl)-2-naphthoate (2i).

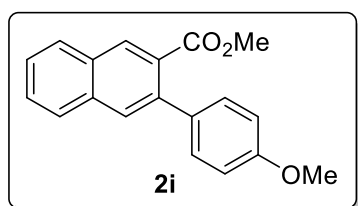

52.0 mg, 89% yield.  $^1\text{H}$  NMR (400 MHz,  $\text{CDCl}_3$ ) ( $\delta$ , ppm) 8.38 (s, 1H), 7.93 (d,  $J = 8.1$  Hz, 1H), 7.86 (d,  $J = 7.9$  Hz, 1H), 7.81 (s, 1H), 7.64 – 7.50 (comp, 2H), 7.43 – 7.32 (comp, 2H), 7.04 – 6.95 (comp, 2H), 3.87 (s, 3H), 3.74 (s, 3H);  $^{13}\text{C}$  NMR (100 MHz,  $\text{CDCl}_3$ ) ( $\delta$ , ppm) 169.3, 159.0, 138.4, 134.5, 133.9, 131.5, 131.0, 129.71, 129.66, 129.3, 128.6, 128.3, 127.8, 126.7, 113.7, 55.4, 52.2. HRMS (TOF MS  $\text{ESI}^+$ ) calculated for  $\text{C}_{19}\text{H}_{16}\text{NaO}_3^+$   $[\text{M}+\text{Na}]^+$ : 315.0992, found 315.0986.

### Methyl 3-(4-fluorophenyl)-2-naphthoate.

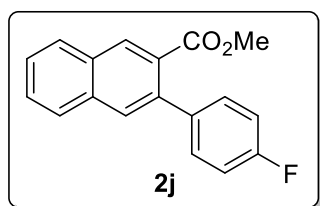

51.6 mg, 92% yield.  $^1\text{H}$  NMR (400 MHz,  $\text{CDCl}_3$ ) ( $\delta$ , ppm) 8.42 (s, 1H), 7.95 (d,  $J = 8.1$  Hz, 1H), 7.86 (d,  $J = 8.1$  Hz, 1H), 7.79 (s, 1H), 7.62 – 7.53 (comp, 2H), 7.39 – 7.33 (comp, 2H), 7.20 – 7.08 (comp, 2H), 3.73 (s, 3H);  $^{13}\text{C}$  NMR (100 MHz,  $\text{CDCl}_3$ ) ( $\delta$ , ppm) 168.8, 162.4 (d,  $J = 246.0$  Hz), 137.9, 137.6 (d,  $J = 3.4$  Hz), 134.5, 131.7, 131.4, 130.2 (d,  $J = 8.0$  Hz), 130.0, 128.9, 128.8, 128.5, 127.9, 127.0, 115.1 (d,  $J = 21.5$  Hz), 52.3;  $^{19}\text{F}$  NMR (376 MHz,  $\text{CDCl}_3$ ) ( $\delta$ , ppm) -115.69. HRMS (TOF MS  $\text{ESI}^+$ ) calculated for  $\text{C}_{18}\text{H}_{13}\text{FNaO}_2^+$  [ $\text{M}+\text{Na}$ ] $^+$ : 303.0792, found 303.0785.

### Methyl 3-(4-chlorophenyl)-2-naphthoate.

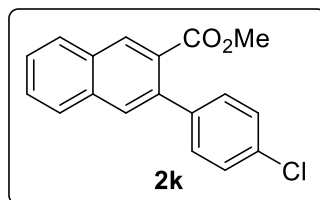

52.2 mg, 88% yield.  $^1\text{H}$  NMR (400 MHz,  $\text{CDCl}_3$ ) ( $\delta$ , ppm) 8.44 (s, 1H), 7.95 (d,  $J = 8.0$  Hz, 1H), 7.86 (d,  $J = 8.1$  Hz, 1H), 7.78 (s, 1H), 7.64 – 7.53 (comp, 2H), 7.44 – 7.37 (comp, 2H), 7.35 – 7.29 (comp, 2H), 3.74 (s, 3H);  $^{13}\text{C}$  NMR (100 MHz,  $\text{CDCl}_3$ ) ( $\delta$ , ppm) 168.7, 140.1, 137.8, 134.5, 133.3, 131.8, 131.5, 129.99, 129.97, 128.8, 128.7, 128.6, 128.3, 127.9, 127.1, 52.3. HRMS (TOF MS  $\text{ESI}^+$ ) calculated for  $\text{C}_{18}\text{H}_{13}\text{ClNaO}_2^+$  [ $\text{M}+\text{Na}$ ] $^+$ : 319.0496, found 319.0500.

### Methyl 3-(4-bromophenyl)-2-naphthoate.

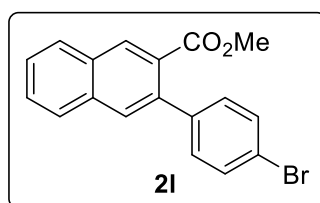

56.0 mg, 82% yield.  $^1\text{H}$  NMR (400 MHz,  $\text{CDCl}_3$ ) ( $\delta$ , ppm) 8.44 (s, 1H), 7.95 (d,  $J = 8.0$  Hz, 1H), 7.86 (d,  $J = 8.1$  Hz, 1H), 7.77 (s, 1H), 7.64 – 7.52 (comp, 4H), 7.31 – 7.23 (comp, 2H), 3.74 (s, 3H);  $^{13}\text{C}$  NMR (100 MHz,  $\text{CDCl}_3$ ) ( $\delta$ , ppm) 168.6, 140.6, 137.8, 134.5, 131.8, 131.6, 131.3, 130.3, 129.9, 128.8, 128.62, 128.55, 127.9, 127.1, 121.5, 52.3. HRMS (TOF MS  $\text{ESI}^+$ ) calculated for  $\text{C}_{18}\text{H}_{13}\text{BrNaO}_2^+$  [ $\text{M}+\text{Na}$ ] $^+$ : 362.9991, found 362.9992.

### Methyl 3-(4-(trifluoromethyl)phenyl)-2-naphthoate.

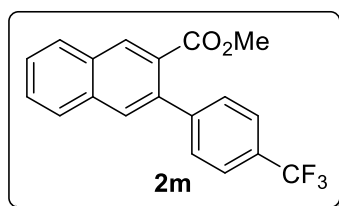

44.3 mg, 67% yield.  $^1\text{H}$  NMR (400 MHz,  $\text{CDCl}_3$ ) ( $\delta$ , ppm) 8.49 (s, 1H), 7.97 (d,  $J = 8.0$  Hz, 1H), 7.88 (d,  $J = 8.1$  Hz, 1H), 7.79 (s, 1H), 7.69 (d,  $J = 8.0$  Hz, 2H), 7.66 – 7.55 (comp, 2H), 7.54 – 7.47 (comp, 2H), 3.73 (s, 3H);  $^{13}\text{C}$  NMR (100 MHz,  $\text{CDCl}_3$ ) ( $\delta$ , ppm) 168.4, 145.5, 137.7, 134.5, 132.0, 131.8, 130.2, 129.1, 128.9, 128.8, 128.3, 128.0, 127.4, 125.1 (q,  $J = 3.7$  Hz), 52.3;  $^{19}\text{F}$  NMR (376 MHz,  $\text{CDCl}_3$ ) ( $\delta$ , ppm) -62.32. HRMS (TOF MS ESI $^+$ ) calculated for  $\text{C}_{19}\text{H}_{13}\text{F}_3\text{NaO}_2^+$   $[\text{M}+\text{Na}]^+$ : 353.0760, found 353.0755.

### Methyl [1,2'-binaphthalene]-3'-carboxylate.

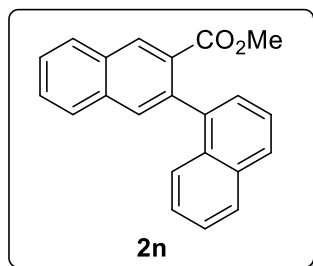

51.9 mg, 83% yield.  $^1\text{H}$  NMR (400 MHz,  $\text{CDCl}_3$ ) ( $\delta$ , ppm) 8.65 (s, 1H), 8.05 (d,  $J = 7.4$  Hz, 1H), 7.96 – 7.87 (comp, 4H), 7.67 – 7.55 (comp, 4H), 7.52 – 7.46 (comp, 2H), 7.42 – 7.36 (m, 1H), 3.45 (s, 3H);  $^{13}\text{C}$  NMR (100 MHz,  $\text{CDCl}_3$ ) ( $\delta$ , ppm) 167.9, 139.9, 137.6, 134.7, 133.3, 132.5, 132.0, 131.4, 131.0, 129.7, 128.9, 128.6, 128.3, 127.9, 127.7, 127.0, 126.4, 126.1, 125.7, 125.3, 52.0. HRMS (TOF MS ESI $^+$ ) calculated for  $\text{C}_{22}\text{H}_{16}\text{NaO}_2^+$   $[\text{M}+\text{Na}]^+$ : 335.1048, found 335.1041.

### Methyl 2-methoxy-[1,2'-binaphthalene]-3'-carboxylate.

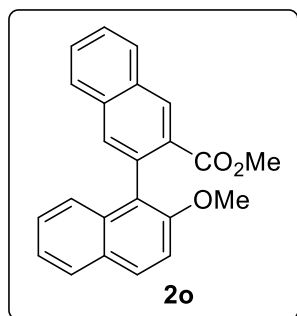

62.3 mg, 91% yield.  $^1\text{H}$  NMR (400 MHz,  $\text{CDCl}_3$ ) ( $\delta$ , ppm) 8.70 (s, 1H), 8.10 – 8.01 (m, 1H), 7.95 (d,  $J = 9.0$  Hz, 1H), 7.91 – 7.81 (comp, 3H), 7.65 – 7.56 (comp, 2H), 7.49 – 7.43 (m, 1H), 7.42 – 7.38 (m, 1H), 7.37 – 7.30 (comp, 2H), 3.83 (s, 3H), 3.58 (s, 3H);  $^{13}\text{C}$  NMR (100 MHz,  $\text{CDCl}_3$ ) ( $\delta$ , ppm) 167.7, 153.6, 134.9, 133.7, 133.5, 132.0, 131.7, 131.5, 130.1, 129.2, 129.1, 129.0, 128.2, 128.1, 127.9, 126.8, 126.4,



125.0, 124.8, 123.5, 113.3, 56.6, 51.9. HRMS (TOF MS ESI<sup>+</sup>) calculated for C<sub>23</sub>H<sub>18</sub>NaO<sub>3</sub><sup>+</sup> [M+Na]<sup>+</sup>: 365.1154, found 365.1151.

### Methyl 3-(thiophen-2-yl)-2-naphthoate.

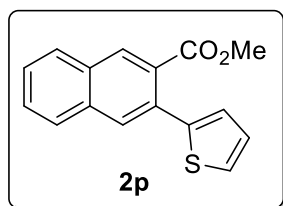

43.5 mg, 81% yield. <sup>1</sup>H NMR (400 MHz, CDCl<sub>3</sub>) (δ, ppm) 8.31 (s, 1H), 7.95 (s, 1H), 7.91 (d, *J* = 8.0 Hz, 1H), 7.86 (d, *J* = 8.0 Hz, 1H), 7.61 – 7.52 (comp, 2H), 7.40 – 7.35 (m, 1H), 7.14 – 7.06 (comp, 2H), 3.81 (s, 3H); <sup>13</sup>C NMR (100 MHz, CDCl<sub>3</sub>) (δ, ppm) 169.0, 142.5, 134.2, 131.9, 130.8, 130.6, 130.5, 129.7, 128.6, 128.4, 127.9, 127.3, 127.2, 126.4, 125.8, 52.4. HRMS (TOF MS ESI<sup>+</sup>) calculated for C<sub>16</sub>H<sub>12</sub>NaO<sub>2</sub>S<sup>+</sup> [M+Na]<sup>+</sup>: 291.0456, found 291.0457.

### Methyl 3-cyclopropyl-2-naphthoate.

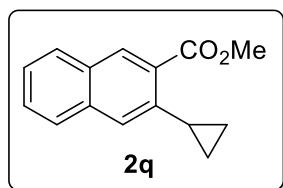

34.4 mg, 76% yield. <sup>1</sup>H NMR (400 MHz, CDCl<sub>3</sub>) (δ, ppm) 8.37 (s, 1H), 7.86 (d, *J* = 8.1 Hz, 1H), 7.76 (d, *J* = 8.1 Hz, 1H), 7.65 – 7.49 (comp, 2H), 7.48 – 7.42 (m, 1H), 3.98 (s, 3H), 2.77 – 2.63 (m, 1H), 1.09 – 0.95 (comp, 2H), 0.84 – 0.69 (comp, 2H); <sup>13</sup>C NMR (100 MHz, CDCl<sub>3</sub>) (δ, ppm) 168.9, 140.4, 135.0, 131.2, 130.9, 130.0, 128.7, 128.1, 127.3, 126.0, 125.3, 52.2, 14.4, 8.2. HRMS (TOF MS ESI<sup>+</sup>) calculated for C<sub>15</sub>H<sub>14</sub>NaO<sub>2</sub><sup>+</sup> [M+Na]<sup>+</sup>: 249.0892, found 249.0876.

### 1-(3-Phenylnaphthalen-2-yl)ethan-1-one.

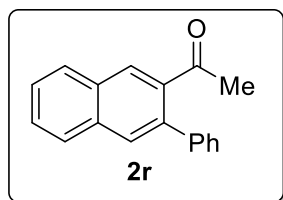

39.9 mg, 81% yield. <sup>1</sup>H NMR (400 MHz, CDCl<sub>3</sub>) (δ, ppm) 8.10 (s, 1H), 7.95 (d, *J* = 7.9 Hz, 1H), 7.88 (d, *J* = 8.0 Hz, 1H), 7.85 (s, 1H), 7.63 – 7.51 (comp, 2H), 7.51 – 7.39 (comp, 5H), 2.13 (s, 3H); <sup>13</sup>C NMR (100 MHz, CDCl<sub>3</sub>) (δ, ppm) 204.4, 141.1, 139.4, 137.6, 134.2, 131.9, 129.6, 129.1, 128.9, 128.8, 128.6, 128.1, 127.9, 127.8, 126.9, 30.6. HRMS (TOF MS ESI<sup>+</sup>) calculated for C<sub>18</sub>H<sub>14</sub>NaO<sup>+</sup> [M+Na]<sup>+</sup>: 269.0937, found 269.0941.

**Phenyl (3-phenylnaphthalen-2-yl)methanone.**

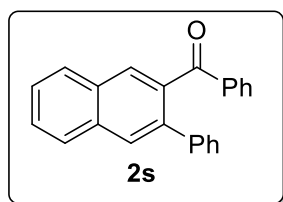

38.2 mg, 62% yield.  $^1\text{H}$  NMR (400 MHz,  $\text{CDCl}_3$ ) ( $\delta$ , ppm) 8.04 (s, 1H), 8.00 – 7.87 (comp, 3H), 7.78 – 7.68 (comp, 2H), 7.63 – 7.54 (comp, 2H), 7.47 – 7.42 (m, 1H), 7.38 – 7.34 (comp, 2H), 7.33 – 7.28 (comp, 2H), 7.27 – 7.22 (comp, 2H), 7.22 – 7.17 (m, 1H);  $^{13}\text{C}$  NMR (100 MHz,  $\text{CDCl}_3$ ) ( $\delta$ , ppm) 198.4, 140.5, 138.6, 137.8, 137.5, 134.2, 133.0, 131.7, 130.2, 129.5, 129.3, 129.2, 128.6, 128.4, 128.3, 128.1, 128.0, 127.3, 127.0. HRMS (TOF MS  $\text{ESI}^+$ ) calculated for  $\text{C}_{23}\text{H}_{16}\text{NaO}^+$   $[\text{M}+\text{Na}]^+$ : 331.1093, found 331.1089.

**(R)-(1R,2S,5R)-2-Isopropyl-5-methylcyclohexyl 2-methoxy-[1,2'-binaphthalene]-3'-carboxylate.**

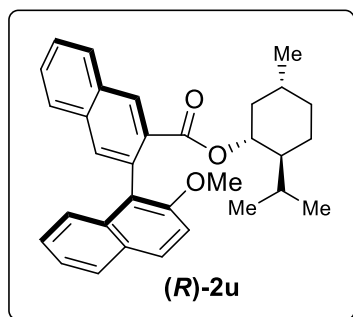

42.0 mg, 45% yield.  $^1\text{H}$  NMR (400 MHz,  $\text{CDCl}_3$ ) ( $\delta$ , ppm) 8.72 (s, 1H), 8.12 – 8.03 (m, 1H), 7.95 (d,  $J = 9.0$  Hz, 1H), 7.90 – 7.83 (comp, 2H), 7.81 (s, 1H), 7.65 – 7.55 (comp, 2H), 7.45 – 7.28 (comp, 4H), 4.67 – 4.54 (m, 1H), 3.80 (s, 3H), 1.86 – 1.75 (m, 1H), 1.61 – 1.52 (m, 1H), 1.49 – 1.41 (m, 1H), 1.39 – 1.18 (comp, 3H), 0.97 – 0.89 (m, 1H), 0.87 – 0.83 (m, 3H), 0.70 – 0.60 (m, 1H), 0.50 (d,  $J = 6.9$  Hz, 3H), 0.63 (d,  $J = 6.9$  Hz, 3H), 0.43 – 0.30 (m, 1H);  $^{13}\text{C}$  NMR (100 MHz,  $\text{CDCl}_3$ ) 167.2, 153.5, 134.8, 134.0, 133.5, 132.0, 131.6, 131.4, 130.9, 129.03, 128.98, 128.9, 128.0, 127.9, 127.8, 126.7, 126.3, 125.4, 123.4, 113.0, 74.5, 56.4, 46.5, 40.3, 34.2, 31.2, 25.6, 23.0, 22.1, 20.7, 15.9. ( $\delta$ , ppm) HRMS (TOF MS  $\text{ESI}^+$ ) calculated for  $\text{C}_{32}\text{H}_{35}\text{O}_3^+$   $[\text{M}+\text{H}]^+$ : 467.2581, found 467.2593.

**(S)-(1R,2S,5R)-2-isopropyl-5-methylcyclohexyl 2-methoxy-[1,2'-binaphthalene]-3'-carboxylate.**

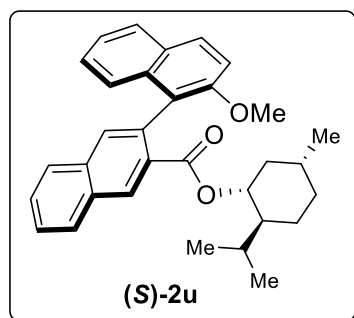

42.0 mg, 45% yield.  $^1\text{H}$  NMR (400 MHz,  $\text{CDCl}_3$ ) 8.77 (s, 1H), 8.19 – 8.11 (m, 1H), 8.02 (d,  $J = 9.0$  Hz, 1H), 7.99 – 7.87 (comp, 3H), 7.75 – 7.64 (comp, 2H), 7.49 (d,  $J = 9.0$  Hz, 1H), 7.44 – 7.39 (m, 1H), 7.37 – 7.33 (comp, 2H), 4.63 (td,  $J = 10.8, 4.4$  Hz, 1H), 3.93 (s, 3H), 1.65 – 1.51 (comp, 4H), 1.43 – 1.26 (comp, 2H), 0.98 – 0.90 (m, 1H), 0.82 (d,  $J = 7.0$  Hz, 3H), 0.79 (d,  $J = 6.5$  Hz, 3H), 0.73 – 0.66 (m, 1H), 0.64 (d,  $J = 7.0$  Hz, 3H), 0.07 – -0.04 (m, 1H);  $^{13}\text{C}$  NMR (100 MHz,  $\text{CDCl}_3$ ) ( $\delta$ , ppm) 167.1, 153.6, 134.9, 134.2, 133.3, 132.0, 131.6, 131.5, 130.9, 129.0, 128.9, 128.8, 128.0, 127.79, 127.75, 126.6, 126.4, 125.3, 125.0, 123.4, 113.3, 74.3, 56.4, 46.6, 39.7, 34.1, 31.1, 25.6, 22.9, 22.0, 21.0, 15.8. HRMS (TOF MS  $\text{ESI}^+$ ) calculated for  $\text{C}_{32}\text{H}_{35}\text{O}_3^+$   $[\text{M}+\text{H}]^+$ : 467.2581, found 467.2593.

**Ethyl 1-hydroxy-3-phenyl-2-naphthoate.**

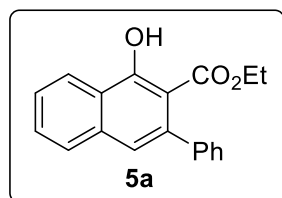

76% yield with **4b** and 91% yield with **4c**.  $^1\text{H}$  NMR (400 MHz,  $\text{CDCl}_3$ ) ( $\delta$ , ppm) 12.32 (s, 1H), 8.46 (d,  $J = 8.3$  Hz, 1H), 7.74 (d,  $J = 8.1$  Hz, 1H), 7.65 – 7.60 (m, 1H), 7.57 – 7.51 (m, 1H), 7.41 – 7.31 (comp, 5H), 7.21 (s, 1H), 4.05 (q,  $J = 7.1$  Hz, 2H), 0.79 (t,  $J = 7.1$  Hz, 3H);  $^{13}\text{C}$  NMR (100 MHz,  $\text{CDCl}_3$ ) ( $\delta$ , ppm) 171.9, 161.5, 143.8, 139.6, 135.7, 129.9, 128.6, 127.6, 127.5, 126.6, 125.9, 124.2, 124.1, 121.3, 106.1, 61.1, 13.1. HRMS (TOF MS  $\text{ESI}^+$ ) calculated for  $\text{C}_{19}\text{H}_{16}\text{NaO}_3^+$   $[\text{M}+\text{Na}]^+$ : 315.0992, found 315.0986.

**Ethyl 1-acetoxy-3-phenyl-2-naphthoate.**

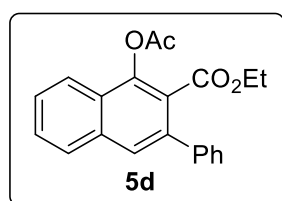

62.2 mg, 93% yield.  $^1\text{H}$  NMR (400 MHz,  $\text{CDCl}_3$ ) ( $\delta$ , ppm) 7.97 – 7.83 (comp, 2H),

7.78 (s, 1H), 7.63 – 7.54 (comp, 2H), 7.50 – 7.35 (comp, 5H), 4.08 (q,  $J = 7.1$  Hz, 2H), 2.48 (s, 3H), 0.95 (t,  $J = 7.1$  Hz, 3H);  $^{13}\text{C}$  NMR (100 MHz,  $\text{CDCl}_3$ ) ( $\delta$ , ppm) 169.3, 166.8, 145.7, 140.6, 138.1, 134.6, 128.6, 128.4, 128.2, 127.6, 127.3, 127.0, 126.0, 123.6, 122.2, 61.5, 20.8, 13.7. HRMS (TOF MS ESI $^+$ ) calculated for  $\text{C}_{21}\text{H}_{18}\text{NaO}_4^+$   $[\text{M}+\text{Na}]^+$ : 357.1097, found 357.1105.

#### Ethyl 1-((4-methoxybenzoyl)oxy)-3-phenyl-2-naphthoate

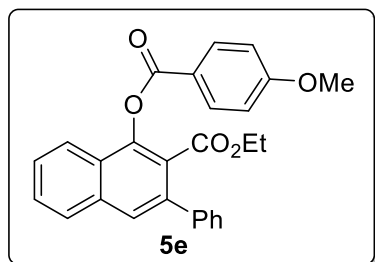

74.1 mg, 87% yield.  $^1\text{H}$  NMR (400 MHz,  $\text{CDCl}_3$ ) ( $\delta$ , ppm) 8.28 (d,  $J = 8.8$  Hz, 2H), 7.91 (d,  $J = 8.6$  Hz, 2H), 7.81 (s, 1H), 7.61 – 7.56 (m, 1H), 7.55 – 7.49 (comp, 3H), 7.45 – 7.37 (comp, 3H), 7.07 – 7.01 (comp, 2H), 4.00 (q,  $J = 7.1$  Hz, 2H), 3.92 (s, 3H), 0.88 (t,  $J = 7.1$  Hz, 3H);  $^{13}\text{C}$  NMR (100 MHz,  $\text{CDCl}_3$ ) ( $\delta$ , ppm) 166.8, 164.7, 164.3, 145.8, 140.5, 138.1, 134.7, 132.8, 128.7, 128.5, 128.2, 128.2, 127.6, 127.3, 127.0, 126.4, 124.2, 122.5, 121.3, 114.2, 61.5, 55.7, 13.7. HRMS (TOF MS ESI $^+$ ) calculated for  $\text{C}_{27}\text{H}_{22}\text{NaO}_5^+$   $[\text{M}+\text{Na}]^+$ : 449.1359, found 449.1359.

#### Ethyl 1-((4-methylphenyl)sulfonamido)-3-phenyl-2-naphthoate.

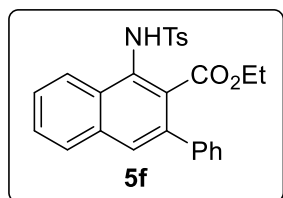

72.2 mg, 81% yield.  $^1\text{H}$  NMR (400 MHz,  $\text{CDCl}_3$ ) ( $\delta$ , ppm) 8.72 – 8.63 (m, 1H), 8.24 (s, 1H), 7.86 – 7.79 (m, 1H), 7.76 (s, 1H), 7.68 – 7.57 (comp, 2H), 7.51 – 7.42 (comp, 2H), 7.39 – 7.29 (comp, 3H), 7.25 – 7.21 (comp, 2H), 7.15 (d,  $J = 8.1$  Hz, 2H), 3.38 (q,  $J = 7.2$  Hz, 2H), 2.33 (s, 3H), 0.47 (t,  $J = 7.2$  Hz, 3H);  $^{13}\text{C}$  NMR (100 MHz,  $\text{CDCl}_3$ ) ( $\delta$ , ppm) 168.6, 143.7, 141.7, 137.9, 136.0, 134.9, 133.3, 130.4, 129.6, 129.3, 128.9, 128.3, 128.2, 128.0, 127.6, 127.4, 127.2, 126.9, 126.2, 61.6, 21.6, 12.7. HRMS (TOF MS ESI $^+$ ) calculated for  $\text{C}_{26}\text{H}_{23}\text{NNaO}_4\text{S}^+$   $[\text{M}+\text{Na}]^+$ : 468.1240, found 468.1257.

#### Benzo[*j*]phenanthridin-6(5*H*)-one (Gao, et al., 2019).

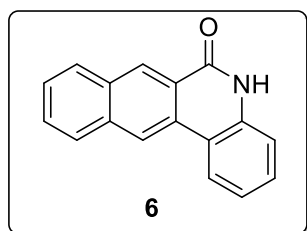

45.6 mg, 93% yield.  $^1\text{H}$  NMR (400 MHz,  $\text{DMSO-}d_6$ ) ( $\delta$ , ppm) 11.55 (s, 1H), 9.08 (s, 1H), 8.98 (s, 1H), 8.56 – 8.50 (m, 1H), 8.24 – 8.15 (comp, 2H), 7.75 – 7.69 (m, 1H), 7.66 – 7.61 (m, 1H), 7.51 – 7.46 (m, 1H), 7.38 – 7.34 (m, 1H), 7.32 – 7.28 (m, 1H);  $^{13}\text{C}$  NMR (100 MHz,  $\text{DMSO-}d_6$ ) ( $\delta$ , ppm) 161.1, 136.4, 134.9, 131.6, 130.4, 129.5, 129.1, 128.6, 128.5, 128.1, 126.8, 124.1, 123.5, 122.4, 121.5, 118.0, 116.3. HRMS (TOF MS ESI $^+$ ) calculated for  $\text{C}_{17}\text{H}_{11}\text{NNaO}^+$   $[\text{M}+\text{Na}]^+$ : 268.0733, found 268.0720.

**Ethyl 1-hydroxy-4-(1*H*-indol-3-yl)-3-(4-methoxyphenyl)-2-naphthoate (15a).**

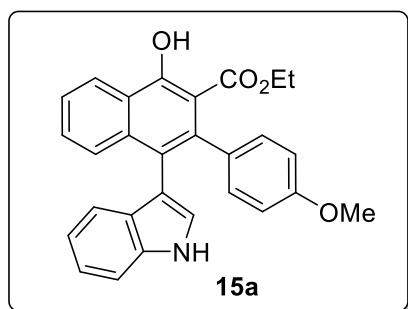

72.6 mg, 83% yield. White solid, mp: 175-176 °C.  $^1\text{H}$  NMR (400 MHz,  $\text{CDCl}_3$ ) ( $\delta$ , ppm) 12.30 (s, 1H), 8.55 – 8.53 (m, 1H), 7.98 (s, 1H), 7.53 – 7.50 (m, 2H), 7.44 – 7.40 (m, 1H), 7.33 – 7.30 (m, 1H), 7.19 – 7.16 (m, 2H), 7.05 – 7.01 (m, 2H), 6.74 – 6.71 (m, 2H), 6.62 (d,  $J = 2.4$  Hz, 1H), 6.43 (dd,  $J = 8.5, 2.5$  Hz, 1H), 4.01 – 3.95 (m, 2H), 3.69 (s, 3H), 0.74 (t,  $J = 7.1$  Hz, 3H);  $^{13}\text{C}$  NMR (100 MHz,  $\text{CDCl}_3$ ) ( $\delta$ , ppm) 172.4, 160.5, 157.8, 139.2, 136.6, 135.6, 135.4, 130.6, 129.6, 129.5, 127.3, 125.6, 125.0, 124.3, 123.92, 123.90, 121.8, 120.2, 119.7, 114.0, 112.2, 111.0, 107.5, 61.1, 55.3, 13.3. HRMS (TOF MS ESI $^+$ ) calculated for  $\text{C}_{28}\text{H}_{23}\text{NO}_4\text{Na}^+$   $[\text{M}+\text{Na}]^+$ : 460.1519, found 460.1508.

**Ethyl 4-(4-chloro-1*H*-indol-3-yl)-1-hydroxy-3-(4-methoxyphenyl)-2-naphthoate.**

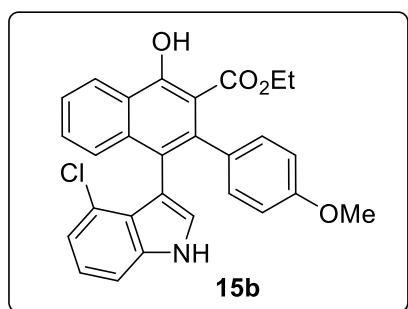

79.1 mg, 84% yield. White solid, mp: 204-205 °C.  $^1\text{H}$  NMR (400 MHz,  $\text{CDCl}_3$ ) ( $\delta$ , ppm) 12.49 (s, 1H), 8.53 (d,  $J = 8.1$  Hz, 1H), 8.05 (s, 1H), 7.52 – 7.48 (m, 1H), 7.45 – 7.38 (m, 2H), 7.14 – 7.12 (m, 1H), 7.05 – 6.96 (comp, 4H), 6.70 (dd,  $J = 8.3, 2.6$  Hz, 1H), 6.66 (d,  $J = 2.3$  Hz, 1H), 6.48 (dd,  $J = 8.4, 2.6$  Hz, 1H), 4.02 – 3.95 (m, 2H), 3.66 (s, 3H), 0.75 (t,  $J = 7.1$  Hz, 3H);  $^{13}\text{C}$  NMR (100 MHz,  $\text{CDCl}_3$ ) ( $\delta$ , ppm) 172.5, 160.9, 157.6, 139.0, 137.9, 136.8, 135.8, 130.6, 129.8, 129.6, 127.1, 126.4, 126.1, 125.8, 125.5, 124.5, 123.9, 123.7, 122.5, 120.5, 113.7, 112.29, 112.25, 109.9, 107.1, 61.0, 55.2, 13.2. HRMS (TOF MS ESI $^+$ ) calculated for  $\text{C}_{28}\text{H}_{22}\text{ClNO}_4\text{Na}^+$   $[\text{M}+\text{Na}]^+$ : 494.1130, found 494.1096.

**Ethyl 4-(4-bromo-1*H*-indol-3-yl)-1-hydroxy-3-(4-methoxyphenyl)-2-naphthoate.**

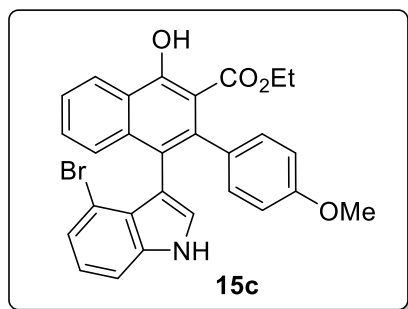

89.8 mg, 87% yield. White solid, mp: 215-216 °C. <sup>1</sup>H NMR (400 MHz, CDCl<sub>3</sub>) (δ, ppm) 12.51 (s, 1H), 8.57 – 8.49 (m, 1H), 8.06 (s, 1H), 7.52 – 7.48 (m, 1H), 7.45 – 7.41 (m, 1H), 7.35 (d, *J* = 8.0 Hz, 1H), 7.18 (d, *J* = 8.0 Hz, 2H), 7.03 – 6.93 (comp, 3H), 6.71 – 6.68 (m, 2H), 6.50 – 6.44 (m, 1H), 4.03 – 3.94 (m, 2H), 3.65 (s, 3H), 0.75 (t, *J* = 7.1 Hz, 3H); <sup>13</sup>C NMR (100 MHz, CDCl<sub>3</sub>) (δ, ppm) 172.5, 161.0, 157.5, 139.1, 138.2, 136.5, 135.8, 130.6, 129.7, 129.6, 127.3, 127.2, 126.1, 125.5, 124.2, 124.0, 123.8, 123.7, 122.8, 114.5, 114.4, 112.3, 110.6, 107.1, 61.1, 55.2, 13.2. HRMS (TOF MS ESI<sup>+</sup>) calculated for C<sub>28</sub>H<sub>22</sub>BrNO<sub>4</sub>Na<sup>+</sup> [M+Na]<sup>+</sup>: 538.0624, found 538.0589.

**Ethyl 1-hydroxy-3-(4-methoxyphenyl)-4-(5-methyl-1*H*-indol-3-yl)-2-naphthoate.**

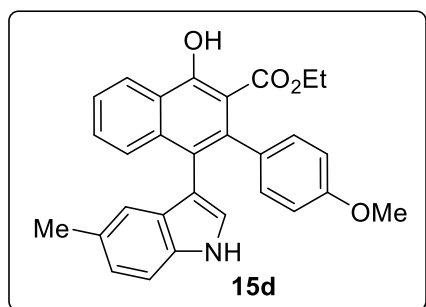

64.4 mg, 71% yield. White solid, mp: 184-185 °C. <sup>1</sup>H NMR (400 MHz, CDCl<sub>3</sub>) (δ, ppm) 12.31 (s, 1H), 8.57 (d, *J* = 8.0 Hz, 1H), 7.86 (s, 1H), 7.56 – 7.51 (m, 2H), 7.46 – 7.40 (m, 1H), 7.18 (d, *J* = 8.8 Hz, 1H), 7.05 – 6.99 (comp, 3H), 6.79 – 6.72 (m, 2H), 6.55 (d, *J* = 2.3 Hz, 1H), 6.45 (dd, *J* = 8.4, 2.4 Hz, 1H), 4.04 – 3.97 (m, 2H), 3.69 (s, 3H), 2.36 (s, 3H), 0.77 (t, *J* = 7.1 Hz, 3H); <sup>13</sup>C NMR (100 MHz, CDCl<sub>3</sub>) (δ, ppm) 172.4, 160.4, 157.7, 139.1, 136.6, 135.6, 133.8, 130.6, 129.8, 129.6, 128.9, 127.4, 125.6, 125.1, 124.3, 124.1, 123.9, 123.4, 119.7, 113.4, 112.3, 112.2, 110.7, 107.5, 61.1, 55.2, 21.6, 13.2. HRMS (TOF MS ESI<sup>+</sup>) calculated for C<sub>29</sub>H<sub>25</sub>NO<sub>4</sub>Na<sup>+</sup> [M+Na]<sup>+</sup>: 474.1676, found 474.1695.

**Ethyl 4-(5-fluoro-1*H*-indol-3-yl)-1-hydroxy-3-(4-methoxyphenyl)-2-naphthoate.**

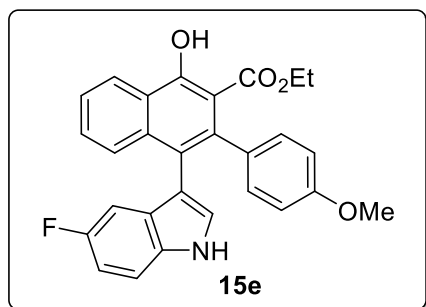

77.4 mg, 85% yield. White solid, mp: 172-173 °C. <sup>1</sup>H NMR (400 MHz, CDCl<sub>3</sub>) (δ, ppm) 12.37 (s, 1H), 8.55 (d, *J* = 8.2 Hz, 1H), 7.99 (s, 1H), 7.54 – 7.42 (comp, 3H), 7.20 – 7.16 (m, 1H), 7.02 (dd, *J* = 8.4, 1.9 Hz, 1H), 6.92 – 6.87 (m, 1H), 6.82 (dd, *J* = 9.6, 2.3 Hz, 1H), 6.76 – 6.70 (m, 2H), 6.68 (d, *J* = 2.3 Hz, 1H), 6.46 (dd, *J* = 8.4, 2.5 Hz, 1H), 3.99 (q, *J* = 7.1 Hz, 2H), 3.69 (s, 3H), 0.75 (t, *J* = 7.1 Hz, 3H); <sup>13</sup>C NMR (100 MHz, CDCl<sub>3</sub>) (δ, ppm) 172.3, 159.2 (d, *J* = 284.0 Hz), 158.1 (d, *J* = 234.6 Hz), 139.4, 136.4, 135.4, 131.9, 130.5, 129.8, 129.7, 129.6, 126.9, 126.7, 125.7, 124.3, 123.9, 123.3, 114.2 (d, *J* = 4.6 Hz), 112.3, 111.7 (d, *J* = 9.6 Hz), 110.3 (d, *J* = 26.5 Hz), 107.4, 104.8 (d, *J* = 23.5 Hz), 61.1, 55.3, 13.2; <sup>19</sup>F NMR (376 MHz, CDCl<sub>3</sub>) (δ, ppm) -124.4. HRMS (TOF MS ESI<sup>+</sup>) calculated for C<sub>28</sub>H<sub>22</sub>FNO<sub>4</sub>Na<sup>+</sup> [M+Na]<sup>+</sup>: 478.1425, found 478.1464.

**Ethyl 4-(5-chloro-1*H*-indol-3-yl)-1-hydroxy-3-(4-methoxyphenyl)-2-naphthoate (15f)**

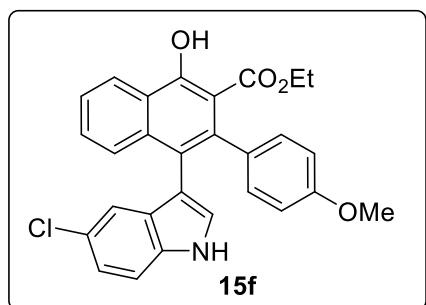

76.3 mg, 81% yield. White solid, mp: 195-196 °C. <sup>1</sup>H NMR (400 MHz, CDCl<sub>3</sub>) (δ, ppm) 12.37 (s, 1H), 8.55 (d, *J* = 8.3 Hz, 1H), 8.03 (s, 1H), 7.55 – 7.51 (m, 1H), 7.45 – 7.44 (m, 2H), 7.19 – 7.08 (comp, 3H), 7.00 (dd, *J* = 8.4, 2.0 Hz, 1H), 6.76 – 6.70 (m, 2H), 6.65 (d, *J* = 2.4 Hz, 1H), 6.46 (dd, *J* = 8.4, 2.6 Hz, 1H), 3.99 (q, *J* = 7.1 Hz, 2H), 3.69 (s, 3H), 0.75 (t, *J* = 7.1 Hz, 3H); <sup>13</sup>C NMR (100 MHz, CDCl<sub>3</sub>) (δ, ppm) 172.2, 160.7, 157.8, 139.4, 136.5, 135.4, 133.8, 130.5, 130.4, 129.8, 129.6, 126.9, 126.3, 125.8, 125.5, 124.3, 124.0, 123.1, 122.2, 119.4, 113.8, 112.3, 112.2, 112.1, 107.4, 61.2, 55.3, 13.2. HRMS (TOF MS ESI<sup>+</sup>) calculated for C<sub>28</sub>H<sub>22</sub>ClNO<sub>4</sub>Na<sup>+</sup> [M+Na]<sup>+</sup>: 494.1130, found 494.1160.

**Ethyl 4-(5-bromo-1*H*-indol-3-yl)-1-hydroxy-3-(4-methoxyphenyl)-2-naphthoate.**

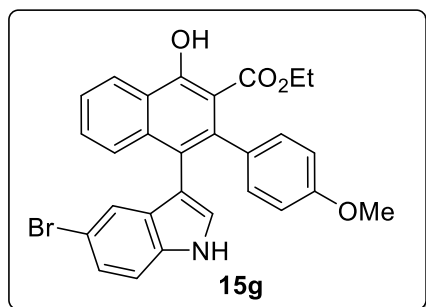

88.5 mg, 86% yield. White solid, mp: 210-211 °C. <sup>1</sup>H NMR (400 MHz, CDCl<sub>3</sub>) (δ, ppm) 12.37 (s, 1H), 8.55 (d, *J* = 8.3 Hz, 1H), 8.03 (s, 1H), 7.55 – 7.51 (m, 1H), 7.45 (d, *J* = 3.4 Hz, 2H), 7.30 (d, *J* = 1.7 Hz, 1H), 7.23 (dd, *J* = 8.6, 1.8 Hz, 1H), 7.13 (d, *J* = 8.6 Hz, 1H), 7.00 (dd, *J* = 8.4, 2.1 Hz, 1H), 6.76 – 6.70 (m, 2H), 6.63 (d, *J* = 2.4 Hz, 1H), 6.47 (dd, *J* = 8.5, 2.6 Hz, 1H), 3.99 (q, *J* = 7.1 Hz, 2H), 3.69 (s, 3H), 0.75 (t, *J* = 7.1 Hz, 3H); <sup>13</sup>C NMR (100 MHz, CDCl<sub>3</sub>) (δ, ppm) 172.2, 160.7, 157.8, 139.5, 136.4, 135.4, 134.0, 131.1, 130.5, 129.9, 129.6, 126.9, 126.2, 125.8, 124.8, 124.3, 124.0, 123.0, 122.4, 113.8, 113.1, 112.6, 112.4, 112.3, 107.4, 61.2, 55.3, 13.2. HRMS (TOF MS ESI<sup>+</sup>) calculated for C<sub>28</sub>H<sub>22</sub>BrNO<sub>4</sub>Na<sup>+</sup> [M+Na]<sup>+</sup>:538.0624, found 538.0642.

**Ethyl 1-hydroxy-4-(5-methoxy-1*H*-indol-3-yl)-3-(4-methoxyphenyl)-2-naphthoate**

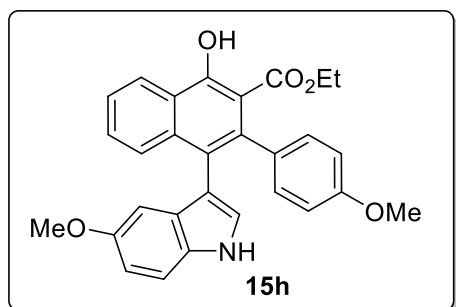

70.0 mg, 75% yield. White solid, mp: 177-178 °C. <sup>1</sup>H NMR (400 MHz, CDCl<sub>3</sub>) (δ, ppm) 12.28 (s, 1H), 8.54 (d, *J* = 8.3 Hz, 1H), 7.91 (s, 1H), 7.55 – 7.50 (m, 2H), 7.46 – 7.41 (m, 1H), 7.18 (d, *J* = 8.8 Hz, 1H), 7.02 – 7.00 (m, 1H), 6.82 (dd, *J* = 8.8, 2.4 Hz, 1H), 6.78 – 6.75 (m, 1H), 6.72 – 6.69 (m, 1H), 6.60 – 6.59 (m, 2H), 6.46 – 6.44 (m, 1H), 4.02 – 3.96 (m, 2H), 3.68 (s, 3H), 3.67 (s, 3H), 0.75 (t, *J* = 7.1 Hz, 3H); <sup>13</sup>C NMR (100 MHz, CDCl<sub>3</sub>) (δ, ppm) 172.3, 160.4, 157.8, 154.2, 139.2, 136.6, 135.5, 130.6, 129.9, 129.64, 129.60, 127.3, 125.7, 125.6, 124.3, 124.0, 123.9, 113.8, 112.3, 112.2, 111.8, 107.6, 101.5, 61.1, 55.8, 55.2, 13.2. HRMS (TOF MS ESI<sup>+</sup>) calculated for C<sub>29</sub>H<sub>25</sub>NO<sub>5</sub>Na<sup>+</sup> [M+Na]<sup>+</sup>: 490.1625, found 490.1601.



**Ethyl 4-(5-cyano-1*H*-indol-3-yl)-1-hydroxy-3-(4-methoxyphenyl)-2-naphthoate**

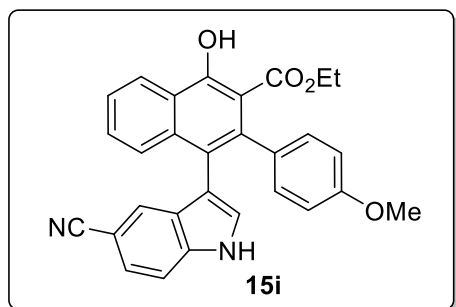

84.1 mg, 91% yield. White solid, mp: 289-290 °C. <sup>1</sup>H NMR (400 MHz, DMSO) (δ, ppm) 11.63 (s, 1H), 10.68 (s, 1H), 8.38 (d, *J* = 8.3 Hz, 1H), 7.58 – 7.51 (m, 2H), 7.46 (t, *J* = 7.3 Hz, 1H), 7.39 – 7.37 (m, 2H), 7.33 (d, *J* = 8.4, 1H), 7.26 (d, *J* = 2.2, 1H), 7.12 (s, 1H), 6.80 (s, 1H), 6.71 (s, 1H), 6.56 (s, 1H), 3.94 (q, *J* = 7.1 Hz, 2H), 3.62 (s, 3H), 0.84 (t, *J* = 7.1 Hz, 3H); <sup>13</sup>C NMR (100 MHz, DMSO) (δ, ppm) 168.6, 157.7, 151.9, 138.2, 137.3, 134.7, 132.5, 130.9, 129.7, 128.8, 128.18, 128.17, 126.3, 125.5, 124.3, 124.2, 123.7, 122.8, 122.0, 120.6, 115.9, 112.9, 112.3, 100.9, 60.5, 54.9, 13.4. HRMS (TOF MS ESI<sup>+</sup>) calculated for C<sub>29</sub>H<sub>22</sub>N<sub>2</sub>O<sub>4</sub>Na<sup>+</sup> [M+Na]<sup>+</sup>: 485.1472, found 485.1484.

**Methyl 3-(3-(ethoxycarbonyl)-4-hydroxy-2-(4-methoxyphenyl)naphthalen-1-yl)-1*H*-indole-5-carboxylate**

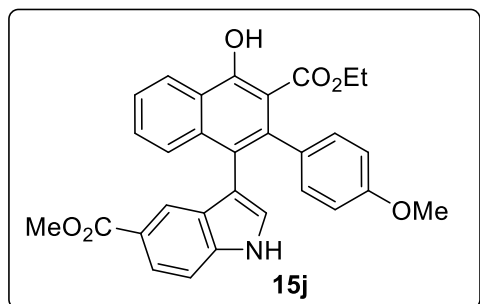

88.7 mg, 90% yield. White solid, mp: 320-321 °C. <sup>1</sup>H NMR (400 MHz, DMSO) (δ, ppm) 11.44 (s, 1H), 10.62 (s, 1H), 8.39 (d, *J* = 8.3 Hz, 1H), 7.70 (dd, *J* = 8.6, 1.5 Hz, 1H), 7.63 (s, 1H), 7.60 – 7.54 (m, 1H), 7.46 – 7.43 (m, 2H), 7.35 (d, *J* = 8.4 Hz, 1H), 7.16 (d, *J* = 2.2 Hz, 2H), 6.72 – 6.53 (comp, 3H), 3.95 (q, *J* = 7.1 Hz, 2H), 3.73 (s, 3H), 3.62 (s, 3H), 0.85 (t, *J* = 7.1 Hz, 3H); <sup>13</sup>C NMR (100 MHz, DMSO) (δ, ppm) 168.4, 167.1, 157.7, 151.5, 138.10, 138.09, 134.7, 132.5, 128.3, 128.1, 127.9, 126.5, 125.5, 124.1, 122.7, 122.5, 122.0, 121.2, 120.4, 116.2, 113.2, 112.3, 111.6, 60.5, 54.9, 51.6, 13.4. HRMS (TOF MS ESI<sup>+</sup>) calculated for C<sub>30</sub>H<sub>25</sub>NO<sub>6</sub>Na<sup>+</sup> [M+Na]<sup>+</sup>: 518.1574, found 518.1528.

**Ethyl 4-(6-fluoro-1H-indol-3-yl)-1-hydroxy-3-(4-methoxyphenyl)-2-naphthoate.**

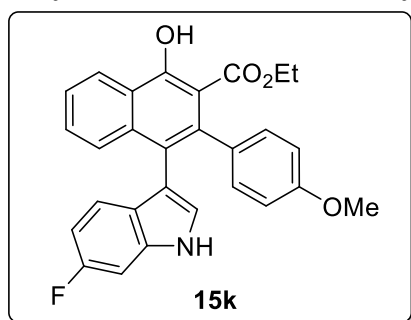

79.2 mg, 87% yield. White solid, mp: 178-179 °C.  $^1\text{H}$  NMR (400 MHz,  $\text{CDCl}_3$ ) ( $\delta$ , ppm) 12.36 (s, 1H), 8.55 (d,  $J = 8.3$  Hz, 1H), 7.99 (s, 1H), 7.57 – 7.39 (comp, 3H), 7.08 – 7.01 (m, 2H), 6.94 (dd,  $J = 9.6, 2.2$  Hz, 1H), 6.80 – 6.71 (comp, 3H), 6.62 (d,  $J = 2.3$  Hz, 1H), 6.46 (dd,  $J = 8.4, 2.6$  Hz, 1H), 3.99 (m, 2H), 3.69 (s, 3H), 0.76 (t,  $J = 7.1$  Hz, 3H);  $^{13}\text{C}$  NMR (100 MHz,  $\text{CDCl}_3$ ) ( $\delta$ , ppm) 172.3, 160.8 (d,  $J = 51.4$  Hz), 158.3 (d,  $J = 93.7$  Hz), 139.3, 136.6, 135.4, 135.27 (d,  $J = 12.6$  Hz), 130.6, 129.7, 129.5, 127.0, 126.0, 125.7, 125.2 (d,  $J = 3.5$  Hz), 124.3, 123.9, 123.5, 120.7 (d,  $J = 10.1$  Hz), 114.1, 112.3 (d,  $J = 8.1$  Hz), 108.5 (d,  $J = 24.4$  Hz), 107.4, 97.34 (d,  $J = 26.1$  Hz), 61.1, 55.2, 13.2;  $^{19}\text{F}$  NMR (376 MHz,  $\text{CDCl}_3$ ) ( $\delta$ , ppm) -121.6. HRMS (TOF MS ESI $^+$ ) calculated for  $\text{C}_{28}\text{H}_{22}\text{FNO}_4\text{Na}^+$  [ $\text{M}+\text{Na}$ ] $^+$ :478.1431, found 478.1452.

**Ethyl 4-(6-chloro-1H-indol-3-yl)-1-hydroxy-3-(4-methoxyphenyl)-2-naphthoate.**

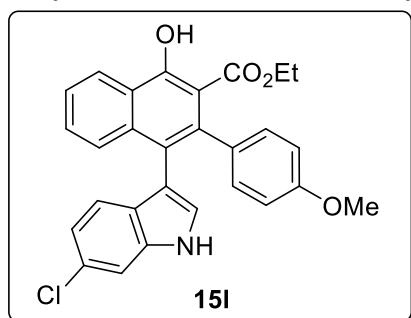

87.6 mg, 93% yield. White solid, mp: 198-199 °C.  $^1\text{H}$  NMR (400 MHz,  $\text{CDCl}_3$ ) ( $\delta$ , ppm) 12.36 (s, 1H), 8.54 (d,  $J = 8.3$  Hz, 1H), 7.98 (s, 1H), 7.54 – 7.50 (m, 1H), 7.46 – 7.41 (m, 2H), 7.26 (s, 1H), 7.07 (d,  $J = 8.4$  Hz, 1H), 7.03 – 6.97 (m, 2H), 6.72 (d,  $J = 8.3$  Hz, 2H), 6.62 (d,  $J = 2.3$  Hz, 1H), 6.45 (dd,  $J = 8.5, 2.6$  Hz, 1H), 4.02 – 3.96 (m, 2H), 3.70 (s, 3H), 0.75 (t,  $J = 7.1$  Hz, 3H);  $^{13}\text{C}$  NMR (100 MHz,  $\text{CDCl}_3$ ) ( $\delta$ , ppm) 172.3, 160.7, 157.8, 139.4, 136.5, 135.7, 135.4, 130.6, 129.7, 129.5, 128.0, 127.8, 126.9, 125.7, 125.6, 124.3, 124.0, 123.2, 120.9, 120.5, 114.2, 112.4, 112.3, 111.0, 107.4, 61.2, 55.3, 13.2. HRMS (TOF MS ESI $^+$ ) calculated for  $\text{C}_{28}\text{H}_{22}\text{ClNO}_4\text{Na}^+$  [ $\text{M}+\text{Na}$ ] $^+$ : 494.1130, found 494.1088.

**Ethyl 1-hydroxy-3-(4-methoxyphenyl)-4-(6-methyl-1*H*-indol-3-yl)-2-naphthoate.**

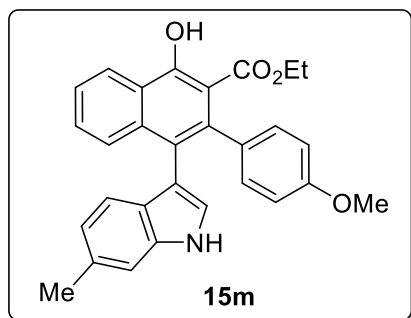

66.7 mg, 74% yield. White solid, mp: 216-217 °C. <sup>1</sup>H NMR (400 MHz, CDCl<sub>3</sub>) (δ, ppm) 12.31 (s, 1H), 8.56 (d, *J* = 8.3 Hz, 1H), 7.82 (s, 1H), 7.55 – 7.50 (m, 2H), 7.44 – 7.40 (m, 1H), 7.10 – 7.03 (comp, 3H), 6.88 (d, *J* = 8.6 Hz, 1H), 6.77 – 6.73 (m, 2H), 6.53 (d, *J* = 2.3 Hz, 1H), 6.45 (dd, *J* = 8.4, 2.5 Hz, 1H), 4.03 – 3.97 (m, 2H), 3.69 (s, 3H), 2.46 (s, 3H), 0.76 (t, *J* = 7.1 Hz, 3H); <sup>13</sup>C NMR (100 MHz, CDCl<sub>3</sub>) (δ, ppm) 172.3, 160.4, 157.7, 139.0, 136.6, 135.9, 135.6, 131.5, 130.6, 129.60, 129.57, 127.4, 127.3, 125.6, 124.4, 124.3, 124.1, 123.9, 121.5, 119.8, 113.7, 112.3, 112.2, 111.0, 107.5, 61.1, 55.2, 21.8, 13.2. HRMS (TOF MS ESI<sup>+</sup>) calculated for C<sub>29</sub>H<sub>25</sub>NO<sub>4</sub>Na<sup>+</sup> [M+Na]<sup>+</sup>: 474.1676, found 474.1658.

**Ethyl 1-hydroxy-3-(4-methoxyphenyl)-4-(7-methyl-1*H*-indol-3-yl)-2-naphthoate**

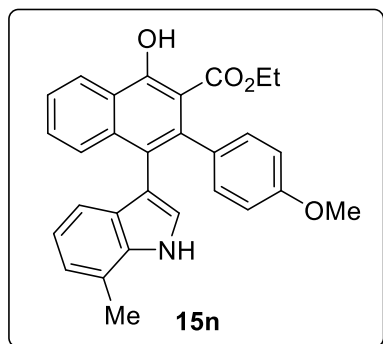

54.1 mg, 60% yield. White solid, mp: 161-162 °C. <sup>1</sup>H NMR (400 MHz, CDCl<sub>3</sub>) (δ, ppm) 12.34 (s, 1H), 8.56 (d, *J* = 8.0 Hz, 1H), 7.86 (s, 1H), 7.51 (d, *J* = 7.9 Hz, 2H), 7.44 – 7.37 (m, 1H), 7.06 (d, *J* = 6.7 Hz, 2H), 7.00 – 6.95 (m, 2H), 6.80 – 6.72 (m, 2H), 6.61 (d, *J* = 2.3 Hz, 1H), 6.45 (dd, *J* = 8.4, 2.3 Hz, 1H), 4.00 (m, 2H), 3.69 (s, 3H), 2.43 (s, 3H), 0.77 (t, *J* = 7.1 Hz, 3H); <sup>13</sup>C NMR (100 MHz, CDCl<sub>3</sub>) (δ, ppm) 172.4, 160.4, 157.7, 139.1, 136.6, 135.6, 135.0, 130.6, 129.7, 129.6, 129.0, 127.3, 125.6, 124.7, 124.3, 124.1, 123.8, 122.4, 120.1, 119.9, 117.9, 114.4, 112.4, 112.2, 107.5, 61.1, 55.2, 16.6, 13.2. HRMS (TOF MS ESI<sup>+</sup>) calculated for C<sub>29</sub>H<sub>25</sub>NO<sub>4</sub>Na<sup>+</sup> [M+Na]<sup>+</sup>: 474.1676, found 474.1627.

**Ethyl 4-(7-chloro-1*H*-indol-3-yl)-1-hydroxy-3-(4-methoxyphenyl)-2-naphthoate**

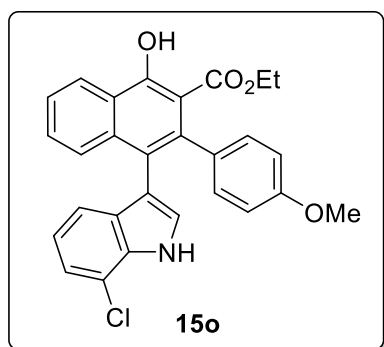

80.1 mg, 85% yield. White solid, mp: 144-145 °C.  $^1\text{H}$  NMR (400 MHz,  $\text{CDCl}_3$ ) ( $\delta$ , ppm) 12.36 (s, 1H), 8.54 (d,  $J = 8.2$  Hz, 1H), 8.25 (s, 1H), 7.54 – 7.50 (m, 1H), 7.45 – 7.40 (m, 2H), 7.18 – 7.16 (m, 1H), 7.07 (d,  $J = 7.9$  Hz, 1H), 7.02 (dd,  $J = 8.4$ , 2.1 Hz, 1H), 6.94 (t,  $J = 7.7$  Hz, 1H), 6.74 – 6.71 (comp, 3H), 6.46 (dd,  $J = 8.5$ , 2.6 Hz, 1H), 4.01 – 3.96 (m, 2H), 3.71 (s, 3H), 0.75 (t,  $J = 7.1$  Hz, 3H);  $^{13}\text{C}$  NMR (100 MHz,  $\text{CDCl}_3$ ) ( $\delta$ , ppm) 172.3, 160.7, 157.9, 139.4, 136.5, 135.3, 132.8, 130.8, 130.6, 129.7, 129.5, 127.0, 125.7, 125.6, 124.3, 124.0, 123.2, 121.3, 120.6, 118.8, 116.5, 115.2, 112.4, 107.5, 61.2, 55.3, 13.3. HRMS (TOF MS  $\text{ESI}^+$ ) calculated for  $\text{C}_{28}\text{H}_{22}\text{ClNO}_4\text{Na}^+$  [ $\text{M}+\text{Na}$ ] $^+$ : 494.1130, found 494.1093.

**Methyl 3-(3-(ethoxycarbonyl)-4-hydroxy-2-(4-methoxyphenyl)naphthalen-1-yl)-1*H*-indole-7-carboxylate**

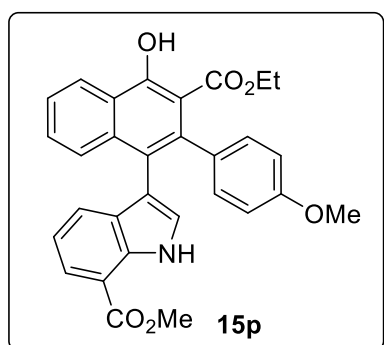

80.2 mg, 81% yield. White solid, mp: 189-190 °C.  $^1\text{H}$  NMR (400 MHz,  $\text{CDCl}_3$ ) ( $\delta$ , ppm) 12.36 (s, 1H), 9.71 (s, 1H), 8.55 (d,  $J = 8.2$  Hz, 1H), 7.90 – 7.82 (m, 1H), 7.53 – 7.49 (m, 1H), 7.47 – 7.41 (m, 2H), 7.40 – 7.36 (m, 1H), 7.04 (t,  $J = 7.7$  Hz, 2H), 6.82 (d,  $J = 2.2$  Hz, 1H), 6.75 – 6.68 (m, 2H), 6.43 (dd,  $J = 8.5$ , 2.5 Hz, 1H), 3.99 (comp, 5H), 3.69 (s, 3H), 0.75 (t,  $J = 7.1$  Hz, 3H);  $^{13}\text{C}$  NMR (100 MHz,  $\text{CDCl}_3$ ) ( $\delta$ , ppm) 172.3, 168.0, 160.6, 157.8, 139.5, 136.6, 135.34, 135.28, 130.6, 130.5, 129.7, 129.5, 127.0, 126.0, 125.8, 125.7, 124.3, 124.3, 124.0, 123.3, 119.0, 114.0, 112.5, 112.4, 112.3, 107.4, 61.1, 55.2, 52.0, 13.2. HRMS (TOF MS  $\text{ESI}^+$ ) calculated for  $\text{C}_{30}\text{H}_{25}\text{NO}_6\text{Na}^+$  [ $\text{M}+\text{Na}$ ] $^+$ : 518.1574, found 518.1541.

### Ethyl 1-hydroxy-3-(4-methoxyphenyl)-4-(1*H*-pyrrol-2-yl)-2-naphthoate

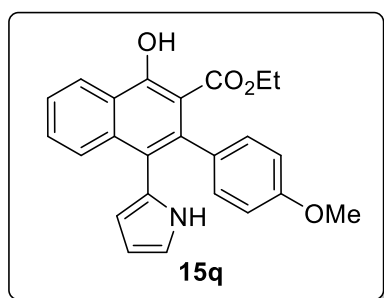

52.7 mg, 68% yield. White solid, mp: 146-147 °C. <sup>1</sup>H NMR (400 MHz, CDCl<sub>3</sub>) (δ, ppm) <sup>1</sup>H NMR (400 MHz, Chloroform-*d*) δ 12.29 (s, 1H), 8.50 – 8.45 (m, 1H), 7.78 – 7.74 (m, 1H), 7.64 (s, 1H), 7.56 – 7.49 (m, 2H), 6.97 – 6.93 (m, 2H), 6.76 – 6.72 (m, 2H), 6.60 – 6.59 (m, 1H), 6.17 – 6.15 (m, 1H), 6.06 – 6.04 (m, 1H), 3.97 (q, *J* = 7.1 Hz, 2H), 3.78 (s, 3H), 0.76 (t, *J* = 7.1 Hz, 3H); <sup>13</sup>C NMR (100 MHz, CDCl<sub>3</sub>) (δ, ppm) 172.1, 160.8, 158.1, 138.9, 136.4, 134.7, 130.04, 129.95, 127.1, 126.6, 125.8, 124.2, 123.8, 123.5, 117.2, 112.7, 111.4, 108.1, 107.1, 61.2, 55.3, 13.2. HRMS (TOF MS ESI<sup>+</sup>) calculated for C<sub>24</sub>H<sub>21</sub>NO<sub>4</sub>Na<sup>+</sup> [M+Na]<sup>+</sup>: 410.1363, found 410.1375.

### Ethyl 4-(furan-2-yl)-1-hydroxy-3-(4-methoxyphenyl)-2-naphthoate

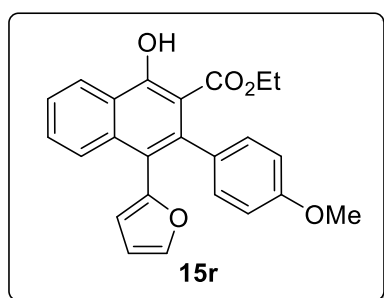

69.3 mg, 89% yield. White solid, mp: 116-117 °C. <sup>1</sup>H NMR (400 MHz, CDCl<sub>3</sub>) (δ, ppm) 12.49 (s, 1H), 8.52 – 8.46 (m, 1H), 7.59 – 7.51 (m, 2H), 7.50 – 7.46 (m, 1H), 7.39 (dd, *J* = 1.8, 0.8 Hz, 1H), 7.00 – 6.96 (m, 2H), 6.76 – 6.72 (m, 2H), 6.29 (dd, *J* = 3.2, 1.9 Hz, 1H), 5.93 (dd, *J* = 3.2, 0.7 Hz, 1H), 3.99 (q, *J* = 7.1 Hz, 2H), 3.79 (s, 3H), 0.77 (t, *J* = 7.1 Hz, 3H); <sup>13</sup>C NMR (100 MHz, CDCl<sub>3</sub>) (δ, ppm) 172.1, 161.8, 158.3, 150.7, 141.6, 140.7, 136.4, 134.4, 130.2, 130.0, 126.1, 125.9, 124.2, 124.0, 121.4, 112.5, 111.3, 110.6, 107.0, 61.3, 55.4, 13.2. HRMS (TOF MS ESI<sup>+</sup>) calculated for C<sub>24</sub>H<sub>20</sub>O<sub>5</sub>Na<sup>+</sup> [M+Na]<sup>+</sup>: 411.1203, found 411.1189.

**The Preparation of  $\pi$ -conjugated polycyclic hydrocarbons (CPHs), related to Figure 2B.**

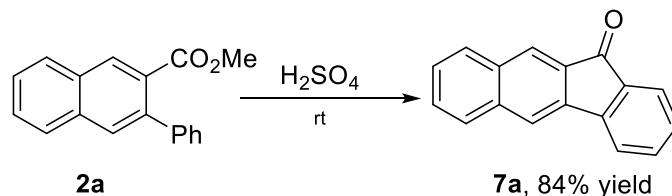

**Synthesis of 7a:** To a 50-mL oven-dried round-bottom flask containing a magnetic stirring bar, **2a** (52.5 mg, 0.2 mmol) was added sulphuric acid (8.0 ml) in 5 min at 0 °C. The reaction mixture was stirred overnight and the reaction temperature was warmed to room temperature slowly. Then, water (50 mL) was added to the reaction mixture and the reaction mixture was stirred for 1-2 h. The yellow solid precipitated out and was filtered under vacuum. The crude product was purified by column chromatography on silica gel (solvents: petroleum ether/ethyl acetate = 20 : 1) to afford 38.7 mg **7a** in 84% yield.  $^1\text{H}$  NMR (400 MHz,  $\text{CDCl}_3$ ) ( $\delta$ , ppm) 8.17 (s, 1H), 7.94 – 7.78 (comp, 3H), 7.77 – 7.68 (comp, 2H), 7.59 – 7.51 (comp, 2H), 7.50 – 7.43 (m, 1H), 7.37 – 7.32 (m, 1H);  $^{13}\text{C}$  NMR (100 MHz,  $\text{CDCl}_3$ ) ( $\delta$ , ppm) 193.3, 145.0, 138.5, 137.1, 136.3, 135.2, 133.8, 132.9, 131.0, 129.3, 129.1, 128.9, 127.1, 125.8, 124.6, 121.1, 119.2. HRMS (TOF MS  $\text{CI}^+$ ) calculated for  $\text{C}_{17}\text{H}_{10}\text{NaO}^+$  [ $\text{M}+\text{Na}$ ] $^+$ : 253.0624, found 253.0630.

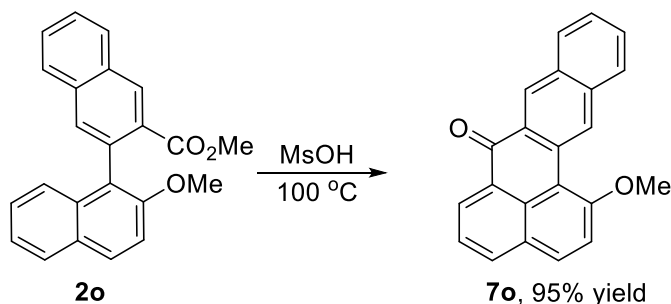

**Synthesis of 7o:** To a 25-mL oven-dried round-bottom flask containing a magnetic stirring bar, **2o** (68.5 mg, 0.2 mmol), and methanesulphonic acid (8.0 mL) were added in sequence under argon at room temperature. Then the reaction mixture was refluxed at 100 °C for 2 h. After cooling to room temperature, water (50 mL) was added to the reaction mixture and the reaction mixture was stirred for 1-2 h. The yellow solid precipitated out and was filtered under vacuum. The crude product was purified by column chromatography on silica gel (ethyl acetate/petroleum ether = 1/3) to give 59.0 mg **7o** in 95% yield.  $^1\text{H}$  NMR (400 MHz,  $\text{CDCl}_3$ ) ( $\delta$ , ppm) 9.57 (s, 1H), 9.07 (s, 1H), 8.81 – 8.74 (m, 1H), 8.09 – 7.98 (comp, 2H), 7.93 (d,  $J = 8.1$  Hz, 1H), 7.85 (d,  $J = 9.1$  Hz, 1H), 7.62 – 7.49 (comp, 3H), 7.38 (d,  $J = 9.1$  Hz, 1H), 4.16 (s, 3H);  $^{13}\text{C}$  NMR (100 MHz,  $\text{CDCl}_3$ ) ( $\delta$ , ppm) 184.3, 158.6, 136.1, 135.1, 131.6, 131.5, 131.2, 130.5, 130.2, 129.6, 129.4, 129.3, 129.14, 129.10, 128.6, 128.3, 128.0, 126.7, 124.1,

114.7, 112.8, 56.3. HRMS (TOF MS  $\text{Cl}^+$ ) calculated for  $\text{C}_{22}\text{H}_{14}\text{NaO}_2^+$   $[\text{M}+\text{Na}]^+$ : 333.0886, found 333.0891.

### The Preparation of chiral 1,2'-dinaphthalene ligands, related to 2D.

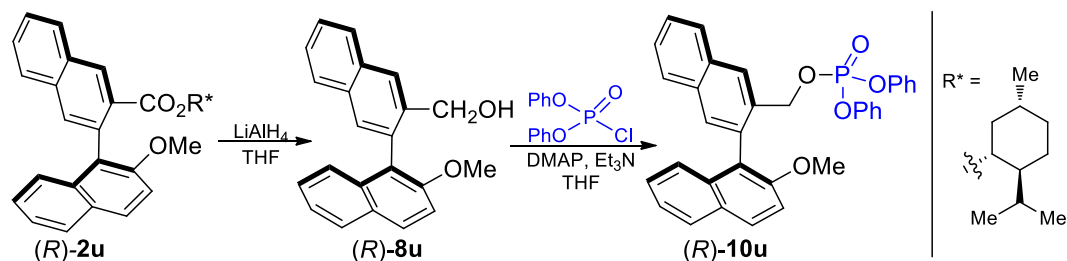

**Synthesis of (R)-8u:** To a 10-mL oven-dried flask containing a magnetic stirring bar, compound (R)-2u (93.3 mg, 0.2 mmol) in dry THF (4.0 mL), was added LiAlH<sub>4</sub> (15.2 mg, 0.4 mmol) portion-wise at 0 °C under argon atmosphere. After completion of addition, the reaction mixture was allowed to warm up to room temperature and stirred for 2 h. After the consumption of starting material (monitored by TLC analysis), the reaction mixture was quenched by addition of Na<sub>2</sub>SO<sub>4</sub>·10H<sub>2</sub>O followed by saturated NH<sub>4</sub>Cl, and extracted with DCM (2 X 5 mL). The combined organic phase was dried over Na<sub>2</sub>SO<sub>4</sub> and the solvent was evaporated under vacuum after filtration. The resulting residues was purified by column chromatography on silica gel (eluent: petroleum ether /EtOAc = 1 : 1) to give 61.0 mg (R)-8u in 97% yield.  $[\alpha]_D^{20} = -54.2^\circ$ , ( $c = 0.34$ , CHCl<sub>3</sub>). <sup>1</sup>H NMR (400 MHz, CDCl<sub>3</sub>) ( $\delta$ , ppm) 8.14 (s, 1H), 8.03 – 7.94 (comp, 2H), 7.92 – 7.82 (comp, 2H), 7.74 (s, 1H), 7.61 – 7.50 (comp, 2H), 7.46 – 7.34 (comp, 2H), 7.34 – 7.27 (comp, 2H), 4.54 – 4.41 (comp, 2H), 3.84 (s, 3H), 2.24 (s, 1H); <sup>13</sup>C NMR (100 MHz, CDCl<sub>3</sub>) ( $\delta$ , ppm) 154.0, 138.7, 134.1, 133.4, 133.3, 133.1, 130.3, 129.8, 129.3, 128.1, 128.0, 127.8, 127.2, 126.8, 126.2, 126.2, 125.1, 124.0, 123.2, 113.6, 64.1, 56.8. HRMS (TOF MS  $\text{Cl}^+$ ) calculated for  $\text{C}_{22}\text{H}_{18}\text{NaO}_2^+$   $[\text{M}+\text{Na}]^+$ : 337.1199, found 337.1210.

**Synthesis of (R)-10u:** To a 10-mL oven-dried flask containing a magnetic stirring bar, (R)-8u (31.4 mg, 0.1 mmol), triethylamine (0.02 mL, 0.3 mmol), and DMAP (1.3 mg, 0.01 mmol) in THF (1.0 mL), was added diphenyl phosphorochloridate (26.9 mg, 0.1 mmol, 100 mol %) over 30 min at 0 °C under argon atmosphere. The reaction mixture was stirred overnight and the reaction temperature was warmed to room temperature slowly. After the consumption of starting material (monitored by TLC analysis), the solvent was removed under reduced pressure and the crude product was purified by column chromatography on silica gel (eluent: petroleum ether /EtOAc = 1:1) to give 46.0 mg (R)-10u in 84%. > 99% ee,  $[\alpha]_D^{20} = -312.5^\circ$ , ( $c = 0.16$ , CHCl<sub>3</sub>). <sup>1</sup>H NMR (400 MHz, CDCl<sub>3</sub>) ( $\delta$ , ppm) 8.02 (s, 1H), 7.96 (d,  $J = 9.1$  Hz, 1H), 7.89 – 7.81 (m, 3H), 7.73 (s, 1H), 7.57 – 7.50 (comp, 2H), 7.41 – 7.33 (comp, 2H), 7.31 – 7.26 (comp,

3H), 7.25 – 7.17 (comp, 3H), 7.17 – 7.09 (comp, 2H), 7.08 – 7.02 (comp, 2H), 7.02 – 6.90 (comp, 2H), 5.22 (dd,  $J = 12.7, 7.3$  Hz, 1H), 5.05 (dd,  $J = 12.6, 7.0$  Hz, 1H), 3.79 (s, 3H);  $^{13}\text{C}$  NMR (100 MHz,  $\text{CDCl}_3$ ) ( $\delta$ , ppm) 154.1, 150.6 (d,  $J = 7.3$  Hz), 150.50 (d,  $J = 7.3$  Hz), 133.9, 133.4, 133.32, 133.28, 133.1, 132.9, 130.5, 130.1, 129.79, 129.749, 129.750, 129.2, 128.2, 128.1, 127.8, 127.1, 126.9, 126.6, 126.4, 125.4 (d,  $J = 1.0$  Hz), 125.3 (d,  $J = 1.1$  Hz), 125.0, 123.8, 121.8, 120.22 (d,  $J = 4.9$  Hz), 120.15 (d,  $J = 4.9$  Hz), 113.2, 68.89 (d,  $J = 5.6$  Hz), 56.4;  $^{31}\text{P}$  NMR (162 MHz,  $\text{CDCl}_3$ ) ( $\delta$ , ppm) -12.04. HRMS (TOF MS  $\text{CI}^+$ ) calculated for  $\text{C}_{34}\text{H}_{28}\text{O}_5\text{P}^+ [\text{M}+\text{H}]^+$ : 547.1669, found 547.1681. HPLC conditions for determination of enantiomeric excess: Chiral IB-3,  $\lambda = 272$  nm, hexane : 2-propanol = 95:5, flow rate = 1.0 mL/min,  $t_{\text{S}} = 27.7$  min,  $t_{\text{R}} = 35.2$  min.

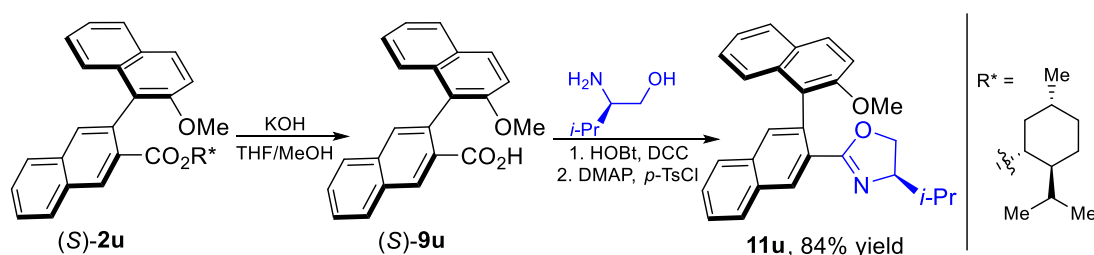

**Synthesis of (S)-9u:** To a 10-mL oven-dried flask containing a magnetic stirring bar, and KOH (112.0 mg, 2.0 mmol) in THF (6.0 mL) and CH<sub>3</sub>OH (2.0 mL), was added the white solid (S)-2u (93.3 mg, 0.2 mmol) at 0 °C. The reaction mixture was stirred at room temperature overnight. Then the solvent was removed under vacuum and the reaction mixture was acidified with 6 N HCl (10.0 mL). The precipitated solid was filtered and washed with water (3 X 15 mL) to give 58.5 mg pure (S)-9u in 86% yield.

$[\alpha]_{\text{D}}^{20} = +22.4^\circ$ , ( $c = 0.08$ ,  $\text{CHCl}_3$ ).  $^1\text{H}$  NMR (400 MHz,  $\text{DMSO}-d_6$ ) ( $\delta$ , ppm) 12.38 (s, 1H), 8.62 (s, 1H), 8.19 – 8.11 (m, 1H), 8.01 – 7.94 (comp, 2H), 7.93 – 7.87 (m, 1H), 7.79 (s, 1H), 7.68 – 7.59 (comp, 2H), 7.51 (d,  $J = 9.1$  Hz, 1H), 7.37 – 7.23 (comp, 3H), 3.75 (s, 3H).;  $^{13}\text{C}$  NMR (100 MHz,  $\text{DMSO}-d_6$ ) ( $\delta$ , ppm) 167.9, 153.3, 134.1, 133.1, 133.0, 131.4, 131.2, 131.1, 130.5, 128.72, 128.68, 128.6, 128.1, 127.9, 127.5, 126.8, 126.2, 124.5, 124.4, 123.1, 113.8, 56.2. HRMS (TOF MS  $\text{CI}^+$ ) calculated for  $\text{C}_{22}\text{H}_{16}\text{NaO}_3^+ [\text{M}+\text{Na}]^+$ : 351.0992, found 351.1000.

**Synthesis of 11u:** To a 10-mL oven-dried flask containing a magnetic stirring bar, (S)-9u (32.8 mg, 0.1 mmol), *N,N*-dicyclohexylcarbodiimide (DCC, 41.2 mg, 0.2 mmol), benzotriazol-1-ol (16.2 mg, 0.12 mmol), and (*R*)-2-amino-3-methylbutan-1-ol (12.4 mg, 0.12 mmol), and dry THF (1.0 mL) were added in sequence at -5 °C. The reaction mixture was stirred for 1 h under these conditions, and then stirred at room temperature overnight. The solvent was evaporated under vacuum after filtration, the obtained white solid was directly used for the next step without further purification.

To a 10-mL oven-dried flask containing a magnetic stirring bar, the above obtained white solid, 4-(dimethylamino)pyridine (1.3 mg, 0.01 mmol), and  $\text{CH}_2\text{Cl}_2$  (1.0 mL), was added triethylamine (22.2 mg, 0.22 mmol) under argon atmosphere at 0 °C. Then



a solution of *p*-toluenesulfonyl chloride (38.2 mg, 0.2 mmol) in CH<sub>2</sub>Cl<sub>2</sub> (0.5 mL) was added to the above reaction mixture at 0 °C. The reaction mixture was stirred at room temperature for 12 h. Then the solvent was evaporated under reduced pressure, and the resulting residues was purified by silica gel column chromatography (petroleum ester/ethyl acetate = 1:1) to give 33.2 mg **11u** in 84% yield. 98% ee,  $[\alpha]_D^{20} = +30.5^\circ$ , (*c* = 0.18, CHCl<sub>3</sub>). <sup>1</sup>H NMR (400 MHz, CDCl<sub>3</sub>) (δ, ppm) 8.59 (s, 1H), 8.03 – 7.97 (m, 1H), 7.89 – 7.78 (comp, 4H), 7.60 – 7.53 (comp, 2H), 7.42 – 7.28 (comp, 4H), 4.06 – 3.98 (m, 1H), 3.85 – 3.77 (comp, 4H), 3.55 (t, *J* = 8.1 Hz, 1H), 1.47 (td, *J* = 13.3, 6.6 Hz, 1H), 0.65 (d, *J* = 6.7 Hz, 3H), 0.62 (d, *J* = 6.7 Hz, 3H); <sup>13</sup>C NMR (100 MHz, CDCl<sub>3</sub>) (δ, ppm) 164.9, 153.9, 134.4, 133.9, 133.1, 132.2, 131.3, 130.6, 129.1, 129.0, 128.7, 127.9, 127.8, 127.7, 126.7, 126.5, 125.4, 124.8, 123.5, 113.5, 72.1, 70.5, 56.8, 32.6, 18.6, 18.0. HRMS (TOF MS CI<sup>+</sup>) calculated for C<sub>27</sub>H<sub>26</sub>NO<sub>2</sub><sup>+</sup> [M+H]<sup>+</sup>: 396.1958, found 396.1969.

**Experimental procedure for the interception reaction of vinyl gold carbenoid intermediate, related to Figure 3A.**

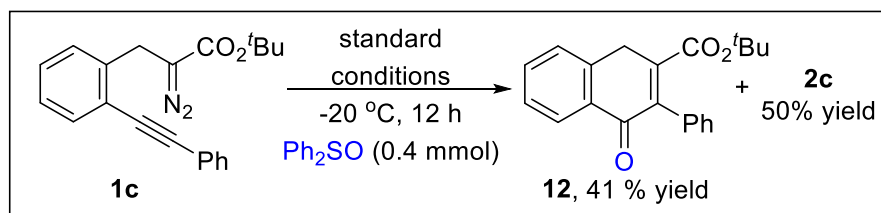

To a 10-mL oven-dried flask containing a magnetic stirring bar, JohnphosAu ( $\text{CH}_3\text{CN}$ ) $\text{SbF}_6$  (7.7 mg, 0.01 mmol, 5.0 mol %), and  $\text{Ph}_2\text{SO}$  (81.0 mg, 0.4 mmol) in dry 1,2-dichloroethane (2.0 mL), was added a solution of diazoacetate **1c** (66.5 mg, 0.2 mmol) in dry 1,2-dichloroethane (2.0 mL) by a syringe in 5 mins at -20 °C under argon atmosphere. After addition, the reaction mixture was stirred at -20 °C for 12 h. Then the solvent was removed under reduced pressure and the crude product was purified by column chromatography on silica gel (solvents: petroleum ether/ethyl acetate = 10 : 1) to afford **2c** (30.5 mg, 50% yield) and **12** (26.3 mg, 41% yield). Compound **12**:  $^1\text{H}$  NMR (400 MHz,  $\text{CDCl}_3$ ) ( $\delta$ , ppm) 8.05 – 7.96 (comp, 2H), 7.71 (d,  $J = 7.6$  Hz, 1H), 7.58 – 7.42 (comp, 4H), 7.39 – 7.30 (m, 1H), 7.26 – 7.21 (m, 1H), 3.93 (s, 2H), 1.72 (s, 9H);  $^{13}\text{C}$  NMR (100 MHz,  $\text{CDCl}_3$ ) ( $\delta$ , ppm) 153.3, 149.2, 147.7, 144.8, 135.9, 132.8, 129.1, 128.8, 128.1, 127.2, 125.6, 125.2, 120.5, 85.5, 33.1, 28.2. HRMS (TOF MS  $\text{CI}^+$ ) calculated for  $\text{C}_{21}\text{H}_{21}\text{O}_3^+$  [ $\text{M}+\text{H}$ ] $^+$ : 321.1485, found 321.1490.

**Experimental procedure for the deuterated reaction of 1a-d to 2a-d, related to Figure 3B.**

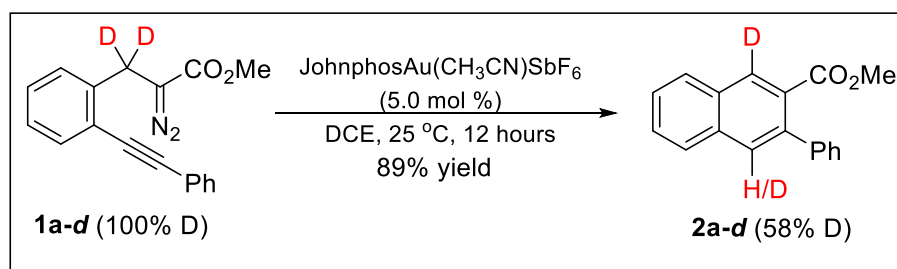

To a 10-mL oven-dried flask containing a magnetic stirring bar, JohnphosAu ( $\text{CH}_3\text{CN}$ ) $\text{SbF}_6$  (7.7 mg, 0.01 mmol, 5.0 mol %) in dry 1,2-dichloroethane (2.0 mL), was added a solution of diazoacetate **1a-d** (58.4 mg, 0.2 mmol) in dry 1,2-dichloroethane (2.0 mL) by a syringe in 5 mins at room temperature under argon atmosphere. After addition, the reaction mixture was stirred at room temperature for 12 h. Then the solvent was removed under reduced pressure and the crude product was purified by column chromatography on silica gel (solvents: petroleum ether/ethyl acetate = 10 : 1) to afford 47.0 mg **2a-d** (58% D, see Figure S2) in 89% yield.

**Experimental procedure for the deuterated reaction of 1a to 2a, related to Figure 3C.**

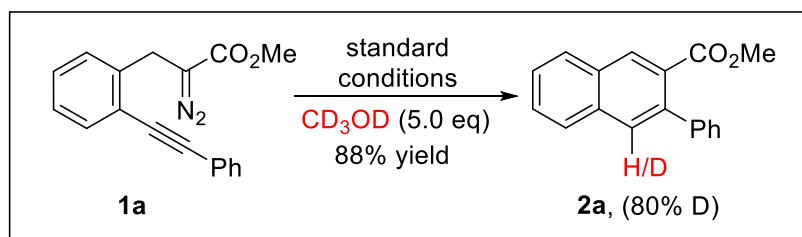

To a 10-mL oven-dried flask containing a magnetic stirring bar, JohnphosAu ( $\text{CH}_3\text{CN}$ ) $\text{SbF}_6$  (7.7 mg, 0.01 mmol, 5.0 mol %) and  $\text{CD}_3\text{OD}$  (36.1 mg, 1.0 mmol) in dry 1,2-dichloroethane (2.0 mL), was added a solution of diazoacetate **1a** (58.0 mg, 0.2 mmol) in dry 1,2-dichloroethane (2.0 mL) by a syringe in 5 mins at room temperature under argon atmosphere. After addition, the reaction mixture was stirred at room temperature for 12 h. Then the solvent was removed under reduced pressure and the crude product was purified by column chromatography on silica gel (solvents: petroleum ether/ethyl acetate = 10 : 1) to give 46.5 mg **2a** (80% D, see Figure S1) in 88% yield.

**Intermolecular kinetic isotope effect (KIE) experiment, related to Figure 3C.**

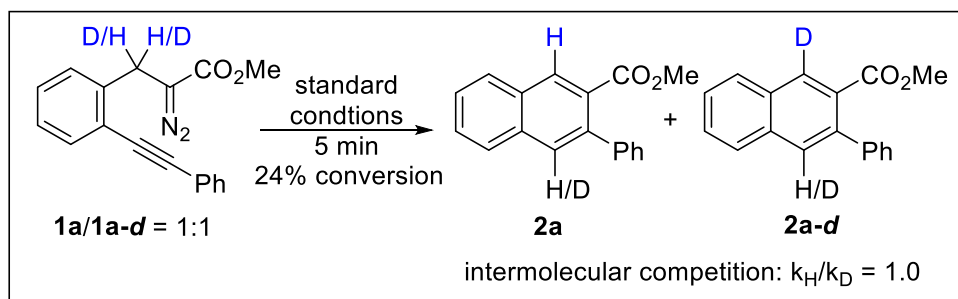

To a dried NMR tube, **1a** (14.5 mg, 0.05 mmol) and **1a-d** (14.6 mg, 0.05 mmol) in dry  $\text{CDCl}_3$  (1.0 mL), was added JohnphosAu( $\text{CH}_3\text{CN}$ ) $\text{SbF}_6$  (3.8 mg, 0.005 mmol, 5.0 mol %). And the reaction mixture was analyzed by proton NMR after 5 minutes at room temperature (Figure S3). And these results intermolecular kinetic isotope effect (KIE) experiment turned out that  $k_{\text{H}}/k_{\text{D}} = 1:1$ .

### Experimental procedure for the $\beta$ -H shift reaction of **1a** to **3a**, related to Table 1.

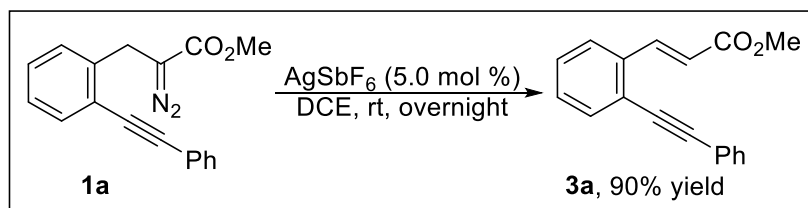

To a 10-mL oven-dried flask containing a magnetic stirring bar,  $\text{AgSbF}_6$  (3.4 mg, 0.01 mmol, 5.0 mol %) in dry 1,2-dichloroethane (2.0 mL), was added a solution of diazoacetate **1a** (58.0 mg, 0.2 mmol) in 1,2-dichloroethane (2.0 mL) by a syringe in 5 mins at room temperature under argon atmosphere. After addition, the reaction mixture was stirred at room temperature for 12 h. Then the solvent was removed under reduced pressure and the crude product was purified by column chromatography on silica gel (solvents: petroleum ether/ethyl acetate = 10 : 1) to give 47.5 mg **3a** in 90% yield.  $^1\text{H NMR}$  (400 MHz,  $\text{CDCl}_3$ ) ( $\delta$ , ppm) 8.15 – 8.05 (m, 1H), 7.87 – 7.74 (comp, 2H), 7.68 – 7.58 (comp, 2H), 7.42 – 7.39 (comp, 4H), 7.07 (d,  $J = 11.5$  Hz, 1H), 6.16 (d,  $J = 15.3$  Hz, 1H), 3.81 (s, 3H);  $^{13}\text{C NMR}$  (100 MHz,  $\text{CDCl}_3$ ) ( $\delta$ , ppm) 167.5, 142.3, 137.0, 131.9, 131.3, 131.1, 129.4, 129.1, 128.8, 128.6, 126.8, 123.0, 122.7, 100.5, 86.0, 51.8. HRMS (TOF MS  $\text{CI}^+$ ) calculated for  $\text{C}_{18}\text{H}_{14}\text{NaO}_2^+$  [ $\text{M}+\text{Na}$ ] $^+$ : 285.0886, found 285.0890.

### Experimental procedure for the $\beta$ -H shift reaction of **11** to **31**, related to Figure 3E.

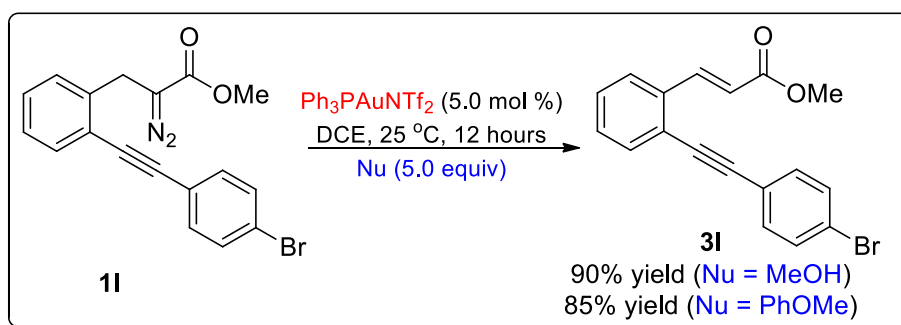

To a 10-mL oven-dried flask containing a magnetic stirring bar,  $\text{Ph}_3\text{PAuNTf}_2$  (7.4 mg, 0.01 mmol, 5.0 mol %) and MeOH (32.0 mg, 1.0 mmol, 5.0 equiv.) or anisole (108.1 mg, 1.0 mmol, 5.0 equiv.) in dry 1,2-dichloroethane (1.0 mL), was added a solution of diazoacetate **11** (73.8 mg, 0.2 mmol) in dry 1,2-dichloroethane (1.0 mL) by a syringe in 5 minutes at room temperature under argon atmosphere. After addition, the reaction mixture was stirred overnight at room temperature. Then the solvent was removed under reduced pressure and the crude product was purified by column chromatography on silica gel (eluent: ethyl acetate/petroleum ether = 1/10) to afford

61.5 mg **3I** in 90% yield with MeOH (85% yield with anisole).  $^1\text{H}$  NMR (400 MHz,  $\text{CDCl}_3$ ) ( $\delta$ , ppm) 8.26 (d,  $J = 16.1$  Hz, 1H), 7.70 – 7.62 (m, 1H), 7.60 – 7.54 (m, 1H), 7.54 – 7.48 (comp, 2H), 7.48 – 7.41 (comp, 2H), 7.41 – 7.32 (comp, 2H), 6.57 (d,  $J = 16.1$  Hz, 1H), 3.83 (s, 3H);  $^{13}\text{C}$  NMR (100 MHz,  $\text{CDCl}_3$ ) ( $\delta$ , ppm) 167.5, 142.8, 135.8, 133.2, 133.0, 131.9, 130.0, 128.9, 126.5, 123.8, 123.1, 122.0, 119.6, 94.6, 88.2, 77.5, 52.0. HRMS (TOF MS  $\text{CI}^+$ ) calculated for  $\text{C}_{18}\text{H}_{14}\text{BrO}_2^+$   $[\text{M}+\text{H}]^+$ : 341.0172, found 341.0164.

### Experimental procedure for the carbocyclization of **1I** to **2I** with MeOH, related to Figure 3E.

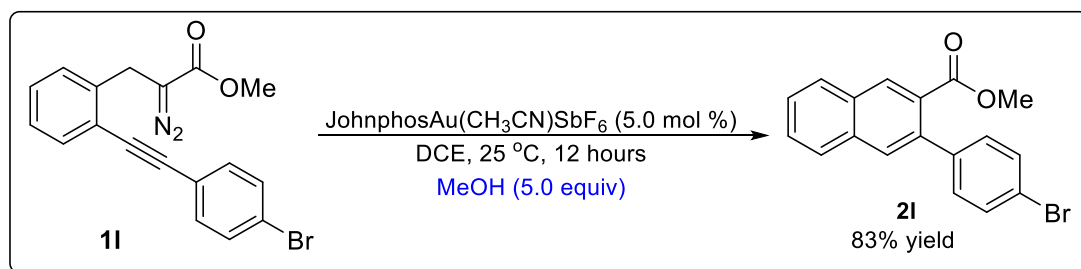

To a 10-mL oven-dried flask containing a magnetic stirring bar, JohnphosAu(CH<sub>3</sub>CN)SbF<sub>6</sub> (7.7 mg, 0.01 mmol, 5.0 mol %) and CH<sub>3</sub>OH (32.0 mg, 1.0 mmol, 5.0 equiv.) in dry 1,2-dichloroethane (1.0 mL), was added a solution of diazoacetate **1I** (73.8 mg, 0.2 mmol) in dry 1,2-dichloroethane (1.0 mL) by a syringe in 5 minutes at room temperature under argon atmosphere. After addition, the reaction mixture was stirred overnight at room temperature. Then the solvent was removed under reduced pressure and the crude product was purified by column chromatography on silica gel (eluent: ethyl acetate/petroleum ether = 1/10) to afford 56.6 mg **2I** in 83% yield.

### Experimental procedure for the Comparison with Rh<sub>2</sub>(OAc)<sub>4</sub>, related to Figure 3E.

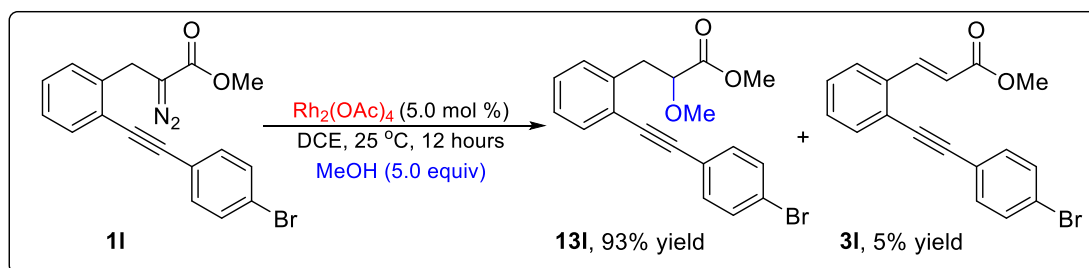

To a 10-mL oven-dried flask containing a magnetic stirring bar, Rh<sub>2</sub>(OAc)<sub>4</sub> (4.4 mg, 0.01 mmol, 5.0 mol %) and CH<sub>3</sub>OH (32.0 mg, 1.0 mmol, 5.0 equiv.) in dry 1,2-dichloroethane (1.0 mL), was added a solution of diazoacetate **1I** (73.8 mg, 0.2 mmol) in dry 1,2-dichloroethane (1.0 mL) by a syringe in 5 minutes at 25°C under

argon atmosphere. After addition, the reaction mixture was stirred at 25°C for 12 hours. Then the solvent was removed under reduced pressure and the crude product was purified by column chromatography on silica gel (eluent: ethyl acetate/petroleum ether = 1/10) to afford **13l** (69.4 mg, 93% yield) and **3l** (3.4 mg, 5% yield). Compound **13l**: <sup>1</sup>H NMR (400 MHz, CDCl<sub>3</sub>) (δ, ppm) 7.54 – 7.44 (comp, 3H), 7.43 – 7.36 (comp, 2H), 7.28 – 7.17 (comp, 3H), 4.14 (dd, *J* = 8.4, 5.1 Hz, 1H), 3.68 (s, 3H), 3.35 (dd, *J* = 13.6, 5.1 Hz, 1H), 3.29 (s, 3H), 3.10 (dd, *J* = 13.6, 8.4 Hz, 1H); <sup>13</sup>C NMR (100 MHz, CDCl<sub>3</sub>) (δ, ppm) 172.7, 139.0, 133.0, 132.2, 131.8, 130.7, 128.7, 127.0, 122.7, 122.7, 122.3, 92.8, 88.8, 80.7, 58.5, 52.1, 38.3. HRMS (TOF MS CI<sup>+</sup>) calculated for C<sub>19</sub>H<sub>18</sub>BrO<sub>3</sub><sup>+</sup> [M+H]<sup>+</sup>: 373.0434, found 373.0450.

### Supplemental References.

Gao, Y., Cai, Z., Li, S., and Li, G. (2019). Rhodium(I)-Catalyzed Aryl C–H Carboxylation of 2-Arylanilines with CO<sub>2</sub>. *Org. Lett.* *21*, 3663–3669.

Gorin, D. J., Davis, N. R., and Toste, F. D. (2005). Gold(I)-catalyzed intramolecular acetylenic schmidt reaction. *J. Am. Chem. Soc.* *127*, 11260–11261.

Hashmi, A. S. K., Bechem, B., Loos, A., Hamzic, M., Rominger, F., and Rabaa, H. (2014). Gold catalysis: biarylphosphine ligands as key for the synthesis of dihydroisocoumarins. *Aust. J. Chem.* *67*, 481–499.

Mauleón, P., M. Zeldin, R., González, A. Z., and Toste, F. D. (2009). Ligand-controlled access to [4 + 2] and [4 + 3] cycloadditions in gold-catalyzed reactions of allene-dienes. *J. Am. Chem. Soc.* *131*, 6348–6349.
